# Supplementary material for: Genome-Wide Analysis of 24-nt siRNAs Dynamic Variations during Rice Superior and Inferior Grain Filling
Source: PLoS One. 2013 Apr 12;8(4):e61029. doi: 10.1371/journal.pone.0061029 (PMC3625182; doi:10.1371/journal.pone.0061029)
Supplement: Table S1 — Frequency of 24 nt-siRNAs greater than 10TPM and their corresponding 24 nt-siRNA*s in each library. (XLS) [file pone.0061029.s005.xls]

## Sheet: siRNA_pairs
Table S1, Frequency of 24nt-siRNAs greater than 10TPM and their corresponding 24nt-siRNA*s in each library.
name	siRNA	TPM	name	siRNA*	TPM
siR217	AAAAACAAAATGTAGGAGCAATAG	14.6	siR198711	ATTGCTCCTACATTTTGTTTTTAG	0.07
siR396	AAAAACTCGACGAGATTGGAGGTG	10.67	siR270044	CCTCCAATCTCGTCGAGTTTTTGT	0.28
siR420	AAAAACTTTGAATAGGACGAATGA	49.2	siR196248	ATTCGTCCTATTCAAAGTTTTTGT	0.07
siR2149	AAAAGATGCCGACAGTACGTCCAA	12.07	siR400799	GGACGTACTGTCGGCATCTTTTCC	4.56
siR2210	AAAAGCAAGTGTATGACGAACTAA	12.07	siR148492	AGTTCGTCATACACTTGCTTTTAA	0.07
siR4102	AAACAAAATGCAGGAGTAGTAGAA	12.49	siR310399	CTACTACTCCTGCATTTTGTTTTT	0.07
siR4821	AAACATACAAAATTAATTCTGGCA	10.53	siR251240	CCAGAATTAATTTTGTATGTTTGC	0.07
siR4919	AAACATCATGTAGAAGCATTTTTC	13.12	siR3678	AAAATGCTTCTACATGATGTTTGT	0.07
siR5153	AAACATTGTGATCCTCCTGACTGT	12.42	siR142651	AGTCAGGAGGATCACAATGTTTTG	0.07
siR5665	AAACCGAGTCTGGACAGTGGCATT	28.63	siR534231	TGCCACTGTCCAGACTCGGTTTGT	0.28
siR6845	AAACTCAGAGACGTACTTCACCTT	11.51	siR415365	GGTGAAGTACGTCTCTGAGTTTGG	0.07
siR6909	AAACTCCTCTACATTGATCGTTGC	38.04	siR22759	AACGATCAATGTAGAGGAGTTTGA	2.18
siR6920	AAACTCGACGAGATTGGAGGTGGC	12.56	siR221292	CACCTCCAATCTCGTCGAGTTTTT	0.07
siR7383	AAACTTCTAGCTCTTCGGATCCAT	15.86	siR403327	GGATCCGAAGAGCTAGAAGTTTGT	0.07
siR7906	AAAGACCGAGCTACACCAAAAGGA	11.79	siR337899	CTTTTGGTGTAGCTCGGTCTTTTC	0.35
siR7990	AAAGACGATCCTAGCAGAGCTTCA	46.88	siR33464	AAGCTCTGCTAGGATCGTCTTTTT	0.21
siR8053	AAAGACTAATAAGGGGGCATTTGC	10.25	siR13455	AAATGCCCCCTTATTAGTCTTTAC	0.07
siR8540	AAAGATGGGGACTATGCAATATAG	20.07	siR162368	ATATTGCATAGTCCCCATCTTTCA	0.07
siR8584	AAAGATTCAGCGTTGGGACCAATA	27.58	siR588847	TTGGTCCCAACGCTGAATCTTTCC	0.14
siR8986	AAAGCCTAAGACTGCATAGCCACT	14.53	siR547297	TGGCTATGCAGTCTTAGGCTTTCT	0.07
siR9247	AAAGCTGTTGGATCCGGTATGTAT	41.13	siR62078	ACATACCGGATCCAACAGCTTTAG	0.14
siR9439	AAAGGATCTGAAACAGCTCGGTAA	33.34	siR72968	ACCGAGCTGTTTCAGATCCTTTTG	0.07
siR9574	AAAGGCGGCAAGCAGTCACTCTCA	12.63	siR111591	AGAGTGACTGCTTGCCGCCTTTTC	0.35
siR9616	AAAGGCTTGTGAAGATGTTCCCAT	10.74	siR409058	GGGAACATCTTCACAAGCCTTTGC	0.07
siR11672	AAATAGCGGACTTCTGCAGAAAGG	26.74	siR597251	TTTCTGCAGAAGTCCGCTATTTAT	9.83
siR11849	AAATATATTCATGGTCGTCTGTAT	15.65	siR59879	ACAGACGACCATGAATATATTTTA	0.49
siR12286	AAATCATAGTAGAAGAGAGCTTGC	53.34	siR33453	AAGCTCTCTTCTACTATGATTTAT	0.07
siR12509	AAATCCGGAAGCAGCATAGATCAC	31.16	siR367478	GATCTATGCTGCTTCCGGATTTAC	0.21
siR12656	AAATCGACTAGGGCTTCCACGGTG	13.54	siR267443	CCGTGGAAGCCCTAGTCGATTTAG	0.07
siR13552	AAATGCGTAACTTTCCGATCGTCA	12.84	siR82121	ACGATCGGAAAGTTACGCATTTTT	1.47
siR14160	AAATTACAAGGTCGACTGCATCCC	31.65	siR369243	GATGCAGTCGACCTTGTAATTTTG	0.07
siR14485	AAATTCTGGCACAAGCGATGATCG	29.34	siR166580	ATCATCGCTTGTGCCAGAATTTTG	0.07
siR15462	AACAACGCCGAGAACATGACCGCA	20.42	siR299236	CGGTCATGTTCTCGGCGTTGTTGA	0.56
siR15655	AACAAGCTCAAAAAGGATTGTATG	10.67	siR453326	TACAATCCTTTTTGAGCTTGTTGT	0.14
siR15983	AACAATGGTGTAGAACGGTGTAGA	11.72	siR453720	TACACCGTTCTACACCATTGTTAC	0.07
siR16046	AACACAAACGATAGAGAGATGACG	20.91	siR484754	TCATCTCTCTATCGTTTGTGTTAT	0.14
siR16144	AACACACGGCACCTGAATGACGGA	17.19	siR302378	CGTCATTCAGGTGCCGTGTGTTGT	0.07
siR16934	AACAGATCGGCATACCTCGCAACC	108.43	siR585349	TTGCGAGGTATGCCGATCTGTTGT	1.75
siR17176	AACAGGCATGAGGAGGTAGGTAGG	42.6	siR456891	TACCTACCTCCTCATGCCTGTTGC	0.07
siR17309	AACAGTCGAAGAGGAAACGTGAAG	21.9	siR480528	TCACGTTTCCTCTTCGACTGTTGC	0.07
siR17618	AACATATTTTGTATTGGTCTGTCA	10.32	siR59807	ACAGACCAATACAAAATATGTTAT	0.07
siR17918	AACATGAAGAGGATAGATCTGTGA	11.44	siR60182	ACAGATCTATCCTCTTCATGTTCC	0.07
siR19300	AACCATCGTCCAAGCAATGAAGAA	10.39	siR331423	CTTCATTGCTTGGACGATGGTTGA	0.07
siR19486	AACCCAAGTGACTACAGAAGATAT	20.07	siR179043	ATCTTCTGTAGTCACTTGGGTTAA	0.7
siR22074	AACGACAAGGCTAGTGAGCGGATG	12.91	siR492311	TCCGCTCACTAGCCTTGTCGTTGT	0.35
siR22504	AACGAGATAGAGCATTAGAGCTAA	18.18	siR125917	AGCTCTAATGCTCTATCTCGTTAC	0.21
siR22830	AACGATCCTTGCGTAATTCAGCTG	20.56	siR394612	GCTGAATTACGCAAGGATCGTTAT	0.21
siR22947	AACGATGAGGTGATGGAGGATAAC	15.51	siR471374	TATCCTCCATCACCTCATCGTTGT	0.35
siR24223	AACGTATCCTAGAACTCAAGAGGC	12.7	siR321957	CTCTTGAGTTCTAGGATACGTTGT	2.32
siR24617	AACTAAAGCTGTTGGATCCGGTAT	53.41	siR74106	ACCGGATCCAACAGCTTTAGTTGA	0.14
siR24918	AACTACTGAACTGCTGAAGGTGGT	51.65	siR221636	CACCTTCAGCAGTTCAGTAGTTCA	0.21
siR24952	AACTAGAACCTGCAGACGGGATAA	14.81	siR169365	ATCCCGTCTGCAGGTTCTAGTTCC	0.07
siR25942	AACTGAATTAGAATGACGTGTGTG	85.55	siR217651	CACACGTCATTCTAATTCAGTTGC	0.07
siR25985	AACTGACGGCTAAGATTTGGTGCA	13.83	siR219249	CACCAAATCTTAGCCGTCAGTTGG	0.07
siR26384	AACTGGCAAATCTGATATCGGTAA	17.69	siR73096	ACCGATATCAGATTTGCCAGTTTG	0.07
siR26553	AACTGTCCTCGGAATTGACTGCAA	20.91	siR378158	GCAGTCAATTCCGAGGACAGTTAT	0.28
siR26731	AACTTACCTTGGATCTATCCGGAC	29.2	siR264022	CCGGATAGATCCAAGGTAAGTTGC	0.21
siR28708	AAGACATCCAAGCATACTCTCGAA	17.05	siR282793	CGAGAGTATGCTTGGATGTCTTAT	0.07
siR28821	AAGACCGAGCTACACCAAAAGGAT	12.14	siR275186	CCTTTTGGTGTAGCTCGGTCTTTT	0.14
siR28831	AAGACCGAGCTGCACTAGAAGGAT	27.86	siR274138	CCTTCTAGTGCAGCTCGGTCTTTT	0.07
siR29164	AAGACGATCCTAGCAGAGCTTCAT	122.68	siR343942	GAAGCTCTGCTAGGATCGTCTTTT	0.28
siR29636	AAGAGAAATGAATAAGATGGCTGA	19.93	siR120485	AGCCATCTTATTCATTTCTCTTGG	0.42
siR30269	AAGAGTGGTCACCTGGTCGTCAAA	10.39	siR522526	TGACGACCAGGTGACCACTCTTTT	0.21
siR31050	AAGATTCAGCGTTGGGACCAATAA	35.72	siR199335	ATTGGTCCCAACGCTGAATCTTTC	0.07
siR31170	AAGATTTGTAGTCATCGTCGATAT	18.81	siR172857	ATCGACGATGACTACAAATCTTAT	0.07
siR31336	AAGCAACTCGACGATTCTTGATAT	20.84	siR163736	ATCAAGAATCGTCGAGTTGCTTGC	0.07
siR31358	AAGCAAGCATACTCTGAAGATTCA	18.11	siR45858	AATCTTCAGAGTATGCTTGCTTCC	0.07
siR31424	AAGCAATGCAAGACCGTAGTTAGT	14.95	siR448785	TAACTACGGTCTTGCATTGCTTAT	0.14
siR31580	AAGCACTGAACCGTCCATTTCCAT	10.46	siR398905	GGAAATGGACGGTTCAGTGCTTAG	4.14
siR31769	AAGCAGTGATCTGGTGTAGTTGTC	11.86	siR209824	CAACTACACCAGATCACTGCTTCT	0.14
siR31785	AAGCAGTTGGAACTTGGAAGTAAA	50.53	siR460811	TACTTCCAAGTTCCAACTGCTTGT	0.07
siR31912	AAGCATCGTAGGCAGTCAGCAACA	11.16	siR586069	TTGCTGACTGCCTACGATGCTTAG	1.19
siR32655	AAGCCTGAGAAGAAGAAGACGTAG	10.25	siR87466	ACGTCTTCTTCTTCTCAGGCTTCA	0.07
siR32880	AAGCGATTGAGGTAGCTGGTTATG	15.44	siR448152	TAACCAGCTACCTCAATCGCTTAT	0.07
siR33533	AAGCTGAGCACGATGACGAATGAC	10.39	siR244545	CATTCGTCATCGTGCTCAGCTTCC	0.07
siR33681	AAGCTGTCGACAAAAATCTTCCTC	12.07	siR399353	GGAAGATTTTTGTCGACAGCTTGC	0.21
siR33696	AAGCTGTGCGGTCATGTTCTCGGC	11.37	siR282313	CGAGAACATGACCGCACAGCTTCG	0.35
siR33728	AAGCTTACAACTGCTAACCGTCGA	35.86	siR354145	GACGGTTAGCAGTTGTAAGCTTCT	0.07
siR33932	AAGCTTTTGCGGAACTTTACCTTC	19.37	siR137227	AGGTAAAGTTCCGCAAAAGCTTGT	0.14
siR34128	AAGGAATACATACTCTGCCGGTAC	28.77	siR74244	ACCGGCAGAGTATGTATTCCTTAT	0.42
siR34328	AAGGACGGCAAGTTGGTGACCATA	25.76	siR550781	TGGTCACCAACTTGCCGTCCTTAA	0.07
siR34407	AAGGAGAGGAAGAACTGCCGGTGT	29.2	siR74265	ACCGGCAGTTCTTCCTCTCCTTGA	0.07
siR34658	AAGGATGAACCGCAGTGCGAGCGC	12.35	siR393705	GCTCGCACTGCGGTTCATCCTTCT	0.14
siR35835	AAGGGTTCATATGTGGTGGCT	37.9	siR249569	CCACCACATATGAACCCTTGT	0.21
siR35914	AAGGTACGAACAGATCGCGAGCAG	36.7	siR393726	GCTCGCGATCTGTTCGTACCTTAG	0.28
siR36032	AAGGTCACTTTGACTCAAATCGTT	11.51	siR287035	CGATTTGAGTCAAAGTGACCTTAA	0.07
siR36103	AAGGTCGACTGCATCCCAAAGTAC	68.36	siR99327	ACTTTGGGATGCAGTCGACCTTGT	1.47
siR36920	AAGTATACTCTTGATCTCACGTGC	28.56	siR87583	ACGTGAGATCAAGAGTATACTTAG	0.21
siR38371	AAGTGTAGAGGATAAACATGTATG	23.09	siR455035	TACATGTTTATCCTCTACACTTCC	0.28
siR39017	AAGTTTAATTCGGAGATTTATGCA	12.98	siR234250	CATAAATCTCCGAATTAAACTTGA	0.07
siR39974	AATAATTAAGTTGATCGATCTGCA	21.76	siR227804	CAGATCGATCAACTTAATTATTGC	0.07
siR40319	AATACCCGACTGCGCTAAGACTGC	34.11	siR144610	AGTCTTAGCGCAGTCGGGTATTGG	7.23
siR40414	AATACCGGGTATTGAATCTTCGTA	17.97	siR276828	CGAAGATTCAATACCCGGTATTTA	0.07
siR40555	AATACGGACCACAAGACGCAATGT	15.58	siR198633	ATTGCGTCTTGTGGTCCGTATTGC	0.14
siR41438	AATAGTCTAGAACACTGCAGGTGC	18.67	siR77659	ACCTGCAGTGTTCTAGACTATTAG	0.07
siR42104	AATATGGATTCGTGTTGGGCCTTC	20.98	siR133006	AGGCCCAACACGAATCCATATTGT	0.28
siR42485	AATATTTTTTGCCGGACACATAAG	23.44	siR474047	TATGTGTCCGGCAAAAAATATTGG	0.14
siR42965	AATCACGGCTGTTGATCGTTGATG	43.09	siR477236	TCAACGATCAACAGCCGTGATTAA	0.21
siR42996	AATCACTAACACCGGCATGTTCTG	12.7	siR340844	GAACATGCCGGTGTTAGTGATTGT	0.21
siR43036	AATCAGAACTACAAGGCACATTAC	12.42	siR49081	AATGTGCCTTGTAGTTCTGATTTT	0.07
siR45378	AATCTCCGACACTGAAGACCGTGA	21.83	siR86195	ACGGTCTTCAGTGTCGGAGATTTA	0.07
siR46298	AATGAATCAGAACTGCAAGCTTCA	10.11	siR33844	AAGCTTGCAGTTCTGATTCATTAG	1.54
siR46561	AATGACTGATGTGCACATTTCTAT	10.67	siR100955	AGAAATGTGCACATCAGTCATTAA	0.07
siR46811	AATGATCTCAAGCACATAGGCTAC	10.88	siR122154	AGCCTATGTGCTTGAGATCATTGA	0.07
siR47549	AATGCGTAACTTTCCGATCGTCAC	18.95	siR352126	GACGATCGGAAAGTTACGCATTTT	0.07
siR48267	AATGGGTGTGCAGCAGGAGTGTAG	14.25	siR59042	ACACTCCTGCTGCACACCCATTTC	0.07
siR48307	AATGGTAGGCTGTGGGTGTAAGGT	10.67	siR329801	CTTACACCCACAGCCTACCATTAA	0.21
siR48974	AATGTCTGAAGTCTGAACCAGAGG	28.42	siR512153	TCTGGTTCAGACTTCAGACATTGA	0.21
siR49737	AATTACCAAGTAGATGACTGTGAA	122.33	siR218188	CACAGTCATCTACTTGGTAATTAG	0.07
siR50231	AATTCAGAAGTGAGAGCAAATGGA	17.4	siR245813	CATTTGCTCTCACTTCTGAATTAA	0.07
siR52437	ACAAAACATTGTGATCCTCCTGAC	60.29	siR231036	CAGGAGGATCACAATGTTTTGTAC	0.07
siR52580	ACAAAATGAATGACGGTGATCTCG	16.56	siR112764	AGATCACCGTCATTCATTTTGTAT	0.07
siR53236	ACAAATGGTAGACGATGAGAAGAT	20.56	siR332985	CTTCTCATCGTCTACCATTTGTGC	0.14
siR53509	ACAACAGATCGGCATACCTCGCAA	35.93	siR387600	GCGAGGTATGCCGATCTGTTGTCA	0.07
siR54008	ACAACGCCGAGAACATGACCGCAC	12.49	siR389937	GCGGTCATGTTCTCGGCGTTGTTG	0.21
siR54789	ACAAGCGTGGCACGAACCAAACAG	35.16	siR445049	GTTTGGTTCGTGCCACGCTTGTAG	0.07
siR54957	ACAAGGTCGACTGCATCCCAAAGT	26.67	siR600054	TTTGGGATGCAGTCGACCTTGTAA	0.63
siR55408	ACAATATTTCTGACGGCTTCACAA	19.16	siR430912	GTGAAGCCGTCAGAAATATTGTGC	0.21
siR55937	ACAATTGATCTCAGAAGGCAAGTA	51.51	siR334608	CTTGCCTTCTGAGATCAATTGTGT	0.07
siR57814	ACACCGACGGGCTTAAATAGGTGG	12.21	siR76597	ACCTATTTAAGCCCGTCGGTGTCT	3.79
siR58259	ACACGAGCTGCACGAGATCCTGGT	15.58	siR231169	CAGGATCTCGTGCAGCTCGTGTGT	0.07
siR59750	ACAGACAAGCCAACGAAGACCTGA	15.93	siR138463	AGGTCTTCGTTGGCTTGTCTGTAA	0.14
siR59785	ACAGACAGATAACATACCTTGAAC	15.44	siR478075	TCAAGGTATGTTATCTGTCTGTTT	0.07
siR60212	ACAGATGACTAGTACTACAAATGA	10.74	siR202510	ATTTGTAGTACTAGTCATCTGTCA	0.07
siR60404	ACAGCATCGTCACCGCTTACGGCC	60.22	siR266286	CCGTAAGCGGTGACGATGCTGTGT	2.39
siR60951	ACAGGCATAGTAGAAAAAACCGGA	66.39	siR300920	CGGTTTTTTCTACTATGCCTGTAG	0.14
siR61440	ACAGTCCGACATTGAAGCCGAGCA	14.32	siR319318	CTCGGCTTCAATGTCGGACTGTTC	0.14
siR61674	ACAGTTGATTTGCGCGGACCATGG	14.6	siR188047	ATGGTCCGCGCAAATCAACTGTCG	0.07
siR61815	ACATAACGGAGCAACTGACAGTGT	17.05	siR96036	ACTGTCAGTTGCTCCGTTATGTGT	0.07
siR62285	ACATAGACTTCAGCACGACACTAC	10.25	siR147314	AGTGTCGTGCTGAAGTCTATGTTT	0.35
siR64508	ACATGGAAGCAAGCATACTCTGAA	18.67	siR227496	CAGAGTATGCTTGCTTCCATGTGC	0.07
siR65152	ACATTATCTTGTTCGACTGGTGGC	11.02	siR219795	CACCAGTCGAACAAGATAATGTGT	0.07
siR65565	ACATTGTGTGAGCGGTAAAATGAC	46.25	siR245898	CATTTTACCGCTCACACAATGTCC	0.07
siR66688	ACCAAGGAGCTAGAGCGACAGCGG	28.28	siR396266	GCTGTCGCTCTAGCTCCTTGGTTT	0.14
siR67836	ACCACTGCTAGACTACAAGACGAG	40.21	siR304083	CGTCTTGTAGTCTAGCAGTGGTCA	1.19
siR68008	ACCAGAAGTAGAGACGAGACACAC	30.25	siR437072	GTGTCTCGTCTCTACTTCTGGTCA	0.07
siR69394	ACCATGGCGCTAGAGGAGGATGAG	10.11	siR238678	CATCCTCCTCTAGCGCCATGGTAA	0.21
siR69402	ACCATGGGGATTGTAGTCATAGGT	10.32	siR313898	CTATGACTACAATCCCCATGGTGC	0.07
siR70099	ACCCACTTGTTTTGAACCGTCGGA	14.46	siR280886	CGACGGTTCAAAACAAGTGGGTAG	0.21
siR70964	ACCCGACTGCGCTAAGACTGCCTA	10.18	siR405083	GGCAGTCTTAGCGCAGTCGGGTAT	1.47
siR72657	ACCGACGGGCTTAAATAGGTGGGG	27.44	siR249941	CCACCTATTTAAGCCCGTCGGTGT	0.14
siR72999	ACCGAGGCTGCTGGTGATTTGCGT	10.25	siR373592	GCAAATCACCAGCAGCCTCGGTTG	0.07
siR73357	ACCGCACGACACCTGAATGACGAA	21.26	siR302382	CGTCATTCAGGTGTCGTGCGGTTG	0.42
siR73815	ACCGCTGCCAGACTACAAGACGAG	12.91	siR304087	CGTCTTGTAGTCTGGCAGCGGTAG	2.81
siR75589	ACCGTGCTCTATGAATTTGATGGT	22.67	siR236522	CATCAAATTCATAGAGCACGGTTT	0.07
siR76045	ACCTAAGTCGACGCAAAGGGCATA	10.32	siR535166	TGCCCTTTGCGTCGACTTAGGTAC	0.21
siR76119	ACCTACAGGACACAAGATTGGCTC	10.18	siR381135	GCCAATCTTGTGTCCTGTAGGTAT	0.14
siR77800	ACCTGGACATGAACAACAAGATGC	11.79	siR179447	ATCTTGTTGTTCATGTCCAGGTAG	0.14
siR79851	ACGACACACGCATTGGAGAGACAT	12.14	siR429420	GTCTCTCCAATGCGTGTGTCGTCT	0.07
siR79951	ACGACAGCGGAGAGGTAGCAGTAG	10.88	siR95154	ACTGCTACCTCTCCGCTGTCGTTG	0.07
siR80862	ACGACTCCACAGACTACCAAGCAC	10.67	siR397908	GCTTGGTAGTCTGTGGAGTCGTGC	0.77
siR81059	ACGAGAAATCTGAGATGCAAGAAG	37.2	siR515632	TCTTGCATCTCAGATTTCTCGTAT	3.86
siR81254	ACGAGATGAAGAGCGAAGTTTGAT	13.12	siR205521	CAAACTTCGCTCTTCATCTCGTCT	0.14
siR81278	ACGAGATTGGTAAAAAGACAGCTC	27.51	siR396361	GCTGTCTTTTTACCAATCTCGTCG	0.21
siR81280	ACGAGATTGTAGTAAATAGATGGA	157.56	siR239902	CATCTATTTACTACAATCTCGTGC	0.14
siR84442	ACGGACTAGCGGTTTACCCCCATT	52.71	siR549410	TGGGGGTAAACCGCTAGTCCGTGT	0.14
siR85142	ACGGCGATGGCTAAGGAAGACTGG	11.02	siR144703	AGTCTTCCTTAGCCATCGCCGTTA	0.07
siR85763	ACGGTACACCCCGTCGACGTCGCC	25.62	siR281000	CGACGTCGACGGGGTGTACCGTGC	0.21
siR86039	ACGGTCAGGCGAGGTGGAGACGCG	39.37	siR303697	CGTCTCCACCTCGCCTGACCGTCT	0.14
siR86475	ACGGTTTATCTATGGCGTCGGTTC	12.07	siR72632	ACCGACGCCATAGATAAACCGTTA	0.14
siR86704	ACGTACTGTCGGCATCTTTTCCAT	27.72	siR398650	GGAAAAGATGCCGACAGTACGTCC	0.21
siR87711	ACGTGCGGATATGACGGTGATGAT	26.39	siR236955	CATCACCGTCATATCCGCACGTGC	0.28
siR87905	ACGTGTAGAAGAGATCATCAGTAG	11.02	siR94498	ACTGATGATCTCTTCTACACGTAT	0.07
siR88059	ACGTTAGATTGATGGGTAGAAGGC	12	siR332761	CTTCTACCCATCAATCTAACGTCG	0.14
siR89838	ACTACTGAACTGCTGAAGGTGGTG	14.95	siR250080	CCACCTTCAGCAGTTCAGTAGTTC	0.14
siR90689	ACTATAGTCGAAGCTGCATTTCAT	51.09	siR340183	GAAATGCAGCTTCGACTATAGTTT	0.07
siR90849	ACTATCGGAACCAAGCAAGCCATT	10.25	siR547761	TGGCTTGCTTGGTTCCGATAGTCC	0.07
siR91657	ACTCAGCGCTCGGTATACTTTACA	23.79	siR447087	TAAAGTATACCGAGCGCTGAGTGG	0.28
siR92700	ACTCGACGAGATTGGAGGTGGCTA	59.09	siR381363	GCCACCTCCAATCTCGTCGAGTTT	0.07
siR93014	ACTCGTCCGGATAGATCCAAGGTA	19.86	siR274562	CCTTGGATCTATCCGGACGAGTGC	0.07
siR93926	ACTGAACAGTCCGACATTGAAGCC	10.74	siR330879	CTTCAATGTCGGACTGTTCAGTGT	0.28
siR94118	ACTGACCAAGCAAAGCCCTGTACC	25.27	siR454323	TACAGGGCTTTGCTTGGTCAGTCG	0.07
siR95516	ACTGGATGGACTTGAGCAAGCGGT	44.92	siR292394	CGCTTGCTCAAGTCCATCCAGTTC	0.07
siR96464	ACTGTTGGCTTGGATCCAGATGGT	23.16	siR240489	CATCTGGATCCAAGCCAACAGTGG	0.07
siR96946	ACTTATATGGTTGTTGGAGAATGA	19.37	siR196655	ATTCTCCAACAACCATATAAGTTT	0.14
siR97887	ACTTCTTAGTTCTGTGGGATGGTT	27.37	siR253609	CCATCCCACAGAACTAAGAAGTAT	0.07
siR98156	ACTTGCACAAAGACATCGCTCGGT	14.11	siR283351	CGAGCGATGTCTTTGTGCAAGTGT	0.63
siR98384	ACTTGGAAGTAAAAGGAAGCAGCA	13.54	siR326009	CTGCTTCCTTTTACTTCCAAGTTC	0.07
siR99316	ACTTTGGATGTACATAGATCG	17.69	siR175697	ATCTATGTACATCCAAAGTTT	0.35
siR99386	ACTTTGTTTGTCGACTTAAGCGGT	49.27	siR292202	CGCTTAAGTCGACAAACAAAGTAA	0.35
siR100017	AGAAAAGTTGCATACCTCTGGAGA	11.09	siR488084	TCCAGAGGTATGCAACTTTTCTGA	0.07
siR100551	AGAAAGCCTAAGACTGCATAGCCA	54.11	siR392701	GCTATGCAGTCTTAGGCTTTCTTC	0.14
siR101032	AGAACAAAACACGACAGAAACTCA	12.14	siR149920	AGTTTCTGTCGTGTTTTGTTCTGT	0.21
siR101335	AGAACCCAACGAAATGATCGTCTT	58.39	siR352075	GACGATCATTTCGTTGGGTTCTCA	0.49
siR101435	AGAACCGTCGAACATATGGCGTCA	28	siR83133	ACGCCATATGTTCGACGGTTCTAG	0.14
siR101448	AGAACCTATCCGAAGTCGTAGGAC	112.15	siR268748	CCTACGACTTCGGATAGGTTCTTC	0.07
siR101845	AGAACTTCTGGATGGTAGAGAACA	46.67	siR578801	TTCTCTACCATCCAGAAGTTCTGC	0.21
siR101975	AGAAGAAGTAGTAGCTGTCCACCA	11.93	siR433925	GTGGACAGCTACTACTTCTTCTAG	0.07
siR102006	AGAAGACACAAACAATCGCGAACA	35.09	siR576540	TTCGCGATTGTTTGTGTCTTCTGA	0.07
siR102048	AGAAGACCCTACTCTGTGTTATCG	42.95	siR150992	ATAACACAGAGTAGGGTCTTCTAA	0.42
siR102429	AGAAGCACTAAGGCGGGTCTGTCG	11.44	siR59822	ACAGACCCGCCTTAGTGCTTCTCG	0.14
siR102457	AGAAGCAGTGATCTGGTGTAGTTG	11.37	siR89117	ACTACACCAGATCACTGCTTCTCT	0.14
siR102640	AGAAGCTGAAGCTGGACTTGTTGT	20.14	siR15735	AACAAGTCCAGCTTCAGCTTCTAG	0.14
siR103439	AGAATACTGGAGACAATCATAACT	60.92	siR569890	TTATGATTGTCTCCAGTATTCTGT	0.14
siR103703	AGAATCGAACTGTGCATCAACTAG	11.93	siR148922	AGTTGATGCACAGTTCGATTCTTA	0.07
siR103827	AGAATGAGTAAGGGACAAATGGTA	10.95	siR255345	CCATTTGTCCCTTACTCATTCTGA	0.28
siR104428	AGACAAGCGACCGAAGAACGTGTG	66.88	siR223742	CACGTTCTTCGGTCGCTTGTCTGT	0.07
siR104433	AGACAAGGACCTATTTAGATTGCA	14.88	siR214964	CAATCTAAATAGGTCCTTGTCTAG	0.07
siR104677	AGACACGATTAACGAGGATTGGTG	15.51	siR248601	CCAATCCTCGTTAATCGTGTCTAC	0.07
siR105122	AGACCAAAGCTCAAGCGACTTCAA	11.44	siR344875	GAAGTCGCTTGAGCTTTGGTCTAT	0.28
siR106163	AGACGACGATTACTACTGGTGGCT	16.91	siR249644	CCACCAGTAGTAATCGTCGTCTGT	0.07
siR106223	AGACGACTAACCATAATACTGCGT	27.51	siR378138	GCAGTATTATGGTTAGTCGTCTAG	0.28
siR106292	AGACGAGATTGTGCATAGCCTACC	93.27	siR465949	TAGGCTATGCACAATCTCGTCTAT	0.07
siR106489	AGACGATCCTAGCAGAGCTTCATC	16	siR519340	TGAAGCTCTGCTAGGATCGTCTTT	1.19
siR106810	AGACGCGTGGTTTCTGTTCGTGGT	68.92	siR221848	CACGAACAGAAACCACGCGTCTAC	0.07
siR107159	AGACGTCCTAGAGCAGATACGAAG	10.95	siR502109	TCGTATCTGCTCTAGGACGTCTAT	0.07
siR107198	AGACGTGAGTGGGAAGACTAATGG	35.58	siR193577	ATTAGTCTTCCCACTCACGTCTCA	0.07
siR107486	AGACTATCGGGAGCATGTTGATGT	12.21	siR163428	ATCAACATGCTCCCGATAGTCTTC	0.07
siR109270	AGAGATATGCGGATGATTAACAGA	13.19	siR561784	TGTTAATCATCCGCATATCTCTGT	0.21
siR109806	AGAGCATGTGAACACAAACCGGAG	23.3	siR266140	CCGGTTTGTGTTCACATGCTCTGC	0.07
siR110090	AGAGCTAGGGCATATTGTAGAAAA	37.97	siR577636	TTCTACAATATGCCCTAGCTCTGA	0.07
siR110234	AGAGCTTGGAACAATGAAGAGTGA	159.17	siR93722	ACTCTTCATTGTTCCAAGCTCTAG	0.07
siR110642	AGAGGCAGAAAGTAGTATGAGTGG	50.74	siR91739	ACTCATACTACTTTCTGCCTCTGC	0.07
siR111280	AGAGTACTCGATTTCATGAAGACA	26.04	siR514189	TCTTCATGAAATCGAGTACTCTGT	0.07
siR112283	AGATAGACCAAAGCTCAAGCGACT	24.56	siR500287	TCGCTTGAGCTTTGGTCTATCTAC	0.07
siR113144	AGATCCTTTTGGTGTAGCTCGGTC	16.98	siR261161	CCGAGCTACACCAAAAGGATCTGA	0.49
siR113232	AGATCGGACACACTACAAGCAGCA	31.86	siR326094	CTGCTTGTAGTGTGTCCGATCTGC	0.14
siR113869	AGATGACGTAGGCTGCTGTGTAAC	13.54	siR453551	TACACAGCAGCCTACGTCATCTAG	0.07
siR113907	AGATGACTGCAACATAGACCACAT	38.18	siR435776	GTGGTCTATGTTGCAGTCATCTAG	0.07
siR114433	AGATGCTCTAAGCTGGTTGTCGTT	32	siR277881	CGACAACCAGCTTAGAGCATCTGT	0.28
siR114767	AGATGTACGAAGTTATAACCCTGA	19.3	siR137070	AGGGTTATAACTTCGTACATCTTG	0.35
siR115084	AGATGTTTGCATATGGTCGTCTGG	131.24	siR106049	AGACGACCATATGCAAACATCTTT	0.98
siR116066	AGATTTTGGCCGACTCGTAGATGG	13.33	siR175070	ATCTACGAGTCGGCCAAAATCTTT	0.07
siR116244	AGCAAAGGCTAAGACTACACCATA	18.11	siR552103	TGGTGTAGTCTTAGCCTTTGCTAT	0.07
siR117310	AGCACCTTCCCCGTCGACCGTCGT	21.55	siR353972	GACGGTCGACGGGGAAGGTGCTAT	0.77
siR117629	AGCACTACTGAAGTTCGAGACATA	10.74	siR557646	TGTCTCGAACTTCAGTAGTGCTGC	1.19
siR117770	AGCAGAAGTCGATCGACGCAACTC	24.91	siR442269	GTTGCGTCGATCGACTTCTGCTGC	0.14
siR117866	AGCAGAGCTTGGCACATTTCACGG	38.53	siR430756	GTGAAATGTGCCAAGCTCTGCTGC	0.14
siR118608	AGCAGTTGTAAGCTTCTTCGAACA	16.63	siR575968	TTCGAAGAAGCTTACAACTGCTAA	0.14
siR123022	AGCGACATTAACAGAACAAGCAAG	20.35	siR541194	TGCTTGTTCTGTTAATGTCGCTGA	0.21
siR123432	AGCGATCTGAAGACATAAGCAAAA	20.7	siR586293	TTGCTTATGTCTTCAGATCGCTAG	0.07
siR123850	AGCGCTGTCTCTGATATCGTCGGG	15.93	siR280054	CGACGATATCAGAGACAGCGCTAA	2.39
siR123937	AGCGGACGGCTGTCTTCTTCTACC	19.16	siR461571	TAGAAGAAGACAGCCGTCCGCTCC	0.07
siR123949	AGCGGACTTCTGCAGAAAGGCACC	59.72	siR536336	TGCCTTTCTGCAGAAGTCCGCTAT	4.77
siR125630	AGCTCCAGACTAGCATATCGGACA	22.11	siR491823	TCCGATATGCTAGTCTGGAGCTAA	0.07
siR126243	AGCTGAGAACTGAGATAATGCAGA	18.46	siR533650	TGCATTATCTCAGTTCTCAGCTAA	0.07
siR126274	AGCTGAGTGTAGATAGACCAAAGC	16.28	siR600234	TTTGGTCTATCTACACTCAGCTAC	0.14
siR126312	AGCTGATGTAGCAGAAGTGAATGC	16.56	siR194644	ATTCACTTCTGCTACATCAGCTCC	0.07
siR126319	AGCTGATGTTGGTAGGGCGGG	21.05	siR288939	CGCCCTACCAACATCAGCTGC	0.21
siR127031	AGCTGTTATGCTAGTCGTCTGAAT	37.9	siR481351	TCAGACGACTAGCATAACAGCTTC	1.97
siR127055	AGCTGTTGGATCCGGTATGTATGT	18.88	siR153657	ATACATACCGGATCCAACAGCTTT	0.35
siR127097	AGCTTACAACTGCTAACCGTCGAC	22.88	siR280880	CGACGGTTAGCAGTTGTAAGCTTC	0.42
siR127196	AGCTTATGTAGGTAGTAGGGTGGA	48.35	siR220348	CACCCTACTACCTACATAAGCTAT	0.14
siR127550	AGCTTGACGATGCTGAAGGATGAT	22.67	siR238832	CATCCTTCAGCATCGTCAAGCTCA	0.14
siR127555	AGCTTGACGGTTTTACTATAGACG	44.49	siR505777	TCTATAGTAAAACCGTCAAGCTGT	0.14
siR128025	AGGAAAATTTAGACAGCACCCATT	30.74	siR549887	TGGGTGCTGTCTAAATTTTCCTAC	0.07
siR128363	AGGAACTGCATGCATTGGAACTAA	19.72	siR148297	AGTTCCAATGCATGCAGTTCCTGT	0.07
siR128446	AGGAAGAGTGACGATGCCAATTTG	15.09	siR51264	AATTGGCATCGTCACTCTTCCTCC	0.07
siR129145	AGGACATGACTATGGTATCTTGAC	11.58	siR211652	CAAGATACCATAGTCATGTCCTCA	0.07
siR129168	AGGACATGTATGATAGCAGGGCAT	49.48	siR383304	GCCCTGCTATCATACATGTCCTCT	0.07
siR129718	AGGACTGATAACCAGAAGTAAGAC	16.98	siR330026	CTTACTTCTGGTTATCAGTCCTAT	0.07
siR130773	AGGAGTTCTGCTAGGAAGGCTGCT	12	siR229389	CAGCCTTCCTAGCAGAACTCCTCC	0.07
siR130853	AGGATAACTAGTGCAGGTGAAGAC	21.19	siR330970	CTTCACCTGCACTAGTTATCCTCC	0.07
siR131783	AGGATTCCAACGAACCAGTGGCTA	46.88	siR381539	GCCACTGGTTCGTTGGAATCCTCT	0.07
siR131894	AGGATTGGTCTTGAAGTCGCTTGA	40.21	siR32802	AAGCGACTTCAAGACCAATCCTTA	4.42
siR132155	AGGCAAGGAATGCAACTGTGATGC	26.95	siR164400	ATCACAGTTGCATTCCTTGCCTAT	0.7
siR132423	AGGCACTCGTAGGCTGCAATGGAG	90.32	siR255117	CCATTGCAGCCTACGAGTGCCTCT	0.07
siR132597	AGGCAGTCTTAGCGCAGTCGGGTA	10.95	siR257451	CCCGACTGCGCTAAGACTGCCTAT	0.49
siR132622	AGGCATAAGGACGGGAAGAGATGT	12.84	siR176978	ATCTCTTCCCGTCCTTATGCCTAC	0.07
siR132875	AGGCCAATAGTAGAAGTTGATCGA	13.54	siR365996	GATCAACTTCTACTATTGGCCTGG	0.07
siR133690	AGGCGCTAAGTAGGCAGGGCAAGT	10.46	siR584952	TTGCCCTGCCTACTTAGCGCCTGA	0.35
siR134630	AGGGAACGTCGATGGCAGCCTGAG	11.86	siR231637	CAGGCTGCCATCGACGTTCCCTCC	0.07
siR134881	AGGGACCTAGCTACACAACTCGCA	16.63	siR284782	CGAGTTGTGTAGCTAGGTCCCTTG	0.07
siR135289	AGGGATGAACTCTTAAAGATGGTG	85.62	siR254193	CCATCTTTAAGAGTTCATCCCTGC	0.07
siR135596	AGGGCATGAGTAGCACGTATTTGC	10.88	siR11519	AAATACGTGCTACTCATGCCCTAC	0.07
siR135920	AGGGCTATGTCATACATCTTGTTC	10.6	siR54628	ACAAGATGTATGACATAGCCCTAC	0.84
siR136193	AGGGGATGTGCAGATAGTATGTGC	21.97	siR62174	ACATACTATCTGCACATCCCCTAG	0.07
siR136331	AGGGGCTGAGCATCAGGATACGGA	19.51	siR301767	CGTATCCTGATGCTCAGCCCCTCA	0.14
siR136602	AGGGTAACTGTCAATGCGCGCATA	11.23	siR537106	TGCGCGCATTGACAGTTACCCTGA	0.07
siR137275	AGGTAAGCGAGCAACGACATGTAC	12.14	siR64824	ACATGTCGTTGCTCGCTTACCTTA	0.21
siR137408	AGGTACGAACAGATCGCGAGCAGT	37.97	siR539187	TGCTCGCGATCTGTTCGTACCTTA	0.07
siR137453	AGGTACTGTGTAACAATCAATGGC	74.11	siR244947	CATTGATTGTTACACAGTACCTAC	0.07
siR138217	AGGTCCTGTTTCGTGTCGGCAATC	13.4	siR584988	TTGCCGACACGAAACAGGACCTTC	0.14
siR138305	AGGTCGGTGTTAGCAATTGATGGG	19.37	siR236781	CATCAATTGCTAACACCGACCTCA	0.07
siR138309	AGGTCGGTTGCGCAGTTTGGAGGC	22.81	siR316220	CTCCAAACTGCGCAACCGACCTGC	0.14
siR138351	AGGTCTAGCAGAAGAATGTGTCAA	15.02	siR347866	GACACATTCTTCTGCTAGACCTGA	0.07
siR138471	AGGTCTTGATCTTCTGATAGGTAT	12.77	siR76466	ACCTATCAGAAGATCAAGACCTAT	0.07
siR138894	AGGTGGAAGAACGTCAACAATTTG	20.35	siR51534	AATTGTTGACGTTCTTCCACCTTT	0.49
siR139731	AGGTTTCATTGTGGTCATCGTCGT	22.39	siR352247	GACGATGACCACAATGAAACCTGA	0.07
siR140709	AGTACGGGTATGAATGAAGTGGCG	24.42	siR250996	CCACTTCATTCATACCCGTACTGT	0.21
siR141776	AGTATCCCAACAACATGATCGCGT	12.14	siR387756	GCGATCATGTTGTTGGGATACTAC	0.07
siR142544	AGTCACGATTGTCGCTGGTGCATG	56.43	siR531319	TGCACCAGCGACAATCGTGACTGC	0.28
siR142954	AGTCCAAGGCGGTCGAGTAGGTAC	19.65	siR76240	ACCTACTCGACCGCCTTGGACTCC	0.63
siR143593	AGTCCTCTGAGCTAACTTTCCGGC	15.23	siR292649	CGGAAAGTTAGCTCAGAGGACTAG	1.61
siR144127	AGTCTAAGATCGTAAAAAATGGAC	11.02	siR255412	CCATTTTTTACGATCTTAGACTTT	0.07
siR144628	AGTCTTATCAAACTGAATCGTCAC	27.16	siR352527	GACGATTCAGTTTGATAAGACTAA	0.07
siR145360	AGTGACTACAGAAGATATATTCAA	19.72	siR345524	GAATATATCTTCTGTAGTCACTTG	0.07
siR146291	AGTGGAAGTCAATGTTGGAAGTCA	17.19	siR97280	ACTTCCAACATTGACTTCCACTAT	0.07
siR146341	AGTGGACGGCTCAAGCGACGATGG	13.05	siR174388	ATCGTCGCTTGAGCCGTCCACTGG	0.07
siR146373	AGTGGAGCATGTTAGAAGTGGAGC	14.39	siR487926	TCCACTTCTAACATGCTCCACTTT	0.07
siR147537	AGTGTTACTGCACAGAGGTCGTCA	25.83	siR80215	ACGACCTCTGTGCAGTAACACTAT	0.07
siR151235	ATAACGAACTTGAGGAATGCAGCG	15.3	siR324859	CTGCATTCCTCAAGTTCGTTATGC	0.14
siR151407	ATAACTGTCCTCGGAATTGACTGC	14.88	siR142461	AGTCAATTCCGAGGACAGTTATGC	0.07
siR152187	ATAAGTAGACGCGGTTCCAATTGG	10.04	siR51207	AATTGGAACCGCGTCTACTTATAT	0.91
siR153126	ATACAAGGAAACAGCTATGAATGA	20.84	siR194835	ATTCATAGCTGTTTCCTTGTATTG	0.07
siR153471	ATACACTAGCTTGGAATTCGATAT	18.25	siR172688	ATCGAATTCCAAGCTAGTGTATCC	0.35
siR154433	ATACCCGACTGCGCTAAGACTGCC	27.09	siR233266	CAGTCTTAGCGCAGTCGGGTATTG	0.14
siR156531	ATAGAACTCCACTGGCATGTTTAA	93.13	siR5023	AAACATGCCAGTGGAGTTCTATAT	0.14
siR156619	ATAGACATTTCAGAGAACAACGGA	124.43	siR306658	CGTTGTTCTCTGAAATGTCTATAT	0.07
siR157574	ATAGCTCTAATGATCACCGGTTAA	11.16	siR20693	AACCGGTGATCATTAGAGCTATAG	0.07
siR158113	ATAGGTTCTGGATGATTATGATGG	11.93	siR166045	ATCATAATCATCCAGAACCTATGC	0.07
siR158164	ATAGTACAAGAGGAAAAGGAGACG	16	siR508084	TCTCCTTTTCCTCTTGTACTATGC	0.07
siR159855	ATATCACACGTTGGTCAGTTTGGT	10.6	siR205416	CAAACTGACCAACGTGTGATATTT	0.07
siR161491	ATATGGTGACAGGCTGACAGCGAT	89.83	siR292099	CGCTGTCAGCCTGTCACCATATGC	0.07
siR163028	ATCAAAAGGATAAGTGGATGGTAT	14.81	siR68986	ACCATCCACTTATCCTTTTGATCA	0.07
siR164336	ATCACACGTTGGTCAGTTTGGTAA	16.77	siR65959	ACCAAACTGACCAACGTGTGATAT	0.14
siR165102	ATCACTGCAGCATTCATCGGCGTC	25.27	siR289215	CGCCGATGAATGCTGCAGTGATTC	0.07
siR165222	ATCAGAACTGCTTGTATTATTCGG	12.35	siR345319	GAATAATACAAGCAGTTCTGATAG	0.14
siR165796	ATCAGTAGCACACTTTAGGATGGT	21.76	siR238534	CATCCTAAAGTGTGCTACTGATAA	0.07
siR166782	ATCATGAATGATCTGACCGTTGGA	35.72	siR209578	CAACGGTCAGATCATTCATGATAT	0.07
siR166885	ATCATGCCTTGTAAAGATCGTCAT	61.76	siR352205	GACGATCTTTACAAGGCATGATGG	0.56
siR167180	ATCATTGAACACTTGTCGGAGTCG	10.88	siR92266	ACTCCGACAAGTGTTCAATGATAA	0.07
siR169329	ATCCCGGGAAGATATGATGGCGTA	30.53	siR288603	CGCCATCATATCTTCCCGGGATGC	0.14
siR169787	ATCCGACCACTGCAAGCTCGAGGA	12.63	siR318740	CTCGAGCTTGCAGTGGTCGGATTT	0.28
siR169941	ATCCGAGTTGACAAGTTTAGAATG	11.65	siR577516	TTCTAAACTTGTCAACTCGGATGA	0.42
siR170205	ATCCGCGCGCTGCAGGACGGTTGT	23.72	siR20782	AACCGTCCTGCAGCGCGCGGATCC	0.07
siR170653	ATCCGTCAGAGAGCAAGGACAGCC	12.56	siR328343	CTGTCCTTGCTCTCTGACGGATAG	0.14
siR172874	ATCGACGGAAGAACATACTCCATT	32.28	siR543943	TGGAGTATGTTCTTCCGTCGATAG	0.56
siR173473	ATCGCCGCTCAGATTGTCGCCGTG	10.18	siR296087	CGGCGACAATCTGAGCGGCGATCT	0.14
siR175326	ATCTAGGAGGGCATTGGAGTGGAT	12.56	siR250658	CCACTCCAATGCCCTCCTAGATGT	0.07
siR177334	ATCTGATCAGGCGTAAGGATCCGC	23.93	siR403361	GGATCCTTACGCCTGATCAGATGC	0.07
siR177701	ATCTGGACAGAAGAAGAGGACAGG	13.47	siR556750	TGTCCTCTTCTTCTGTCCAGATGT	0.07
siR178923	ATCTTCGTAAACTAGTTGGGCATA	12	siR534700	TGCCCAACTAGTTTACGAAGATAA	0.14
siR179333	ATCTTGGTTCTGGAAGAAGAAGGC	11.65	siR333636	CTTCTTCTTCCAGAACCAAGATGG	0.07
siR181359	ATGACGGTAAGTGGGGATGTGTAC	14.67	siR57089	ACACATCCCCACTTACCGTCATGG	0.35
siR181512	ATGACTGCTTTACGGGACGGAGTG	43.79	siR317571	CTCCGTCCCGTAAAGCAGTCATGT	0.56
siR181709	ATGAGATAGCTTTTTTGGTCGTGG	14.18	siR80059	ACGACCAAAAAAGCTATCTCATAC	0.49
siR181890	ATGAGCTGCAAGTTTGAAATGATG	23.58	siR486217	TCATTTCAAACTTGCAGCTCATCC	0.07
siR182839	ATGATTTGTATGAGTGAAGATTGA	21.26	siR45855	AATCTTCACTCATACAAATCATTT	0.21
siR183600	ATGCATAGTTTGACGGTTGAGTGA	10.46	siR91382	ACTCAACCGTCAAACTATGCATAG	0.07
siR184481	ATGCCTTGTAAAGATCGTCATCTG	10.53	siR368480	GATGACGATCTTTACAAGGCATGA	0.07
siR185461	ATGCTGCTGAATGAGAAGATGGAT	48.49	siR254163	CCATCTTCTCATTCAGCAGCATGC	0.07
siR186633	ATGGCACGAGCACGATCTTTCGCA	10.46	siR275559	CGAAAGATCGTGCTCGTGCCATTG	0.84
siR186665	ATGGCAGAGCGACGAGACTAAGAA	32.84	siR330300	CTTAGTCTCGTCGCTCTGCCATCT	0.07
siR187118	ATGGCTCCGTGCTTGATTGTTGGT	11.09	siR207372	CAACAATCAAGCACGGAGCCATGA	0.07
siR187785	ATGGTAGACGCTGAAGAACATGGC	30.32	siR243674	CATGTTCTTCAGCGTCTACCATAA	0.35
siR188562	ATGTAACAAAGATAGCAGGACGTG	66.39	siR302988	CGTCCTGCTATCTTTGTTACATGT	0.14
siR188682	ATGTACATAGATCGTTGAGGC	10.18	siR314768	CTCAACGATCTATGTACATCC	0.21
siR188839	ATGTAGAGATGGTGAAGCAAAGGC	11.44	siR337213	CTTTGCTTCACCATCTCTACATAC	0.07
siR189994	ATGTCTCGTACTGTTATGTGCATC	25.34	siR531215	TGCACATAACAGTACGAGACATGT	0.07
siR190615	ATGTGGAAGGAACCAGAAGCTGAT	12.42	siR230529	CAGCTTCTGGTTCCTTCCACATAT	0.07
siR191233	ATGTTCGACAACTATGATGAGGAC	14.18	siR269907	CCTCATCATAGTTGTCGAACATGT	0.07
siR191315	ATGTTCTTCGATCGTAGGATGGCG	18.88	siR253714	CCATCCTACGATCGAAGAACATGC	0.35
siR192568	ATTACAGGACATGCAACAAGTAAG	14.25	siR461119	TACTTGTTGCATGTCCTGTAATGC	0.07
siR193581	ATTAGTGACAAGTGTAGGCCGACA	18.11	siR500967	TCGGCCTACACTTGTCACTAATAG	0.07
siR194576	ATTCACGACATAGCCAGTAGAGCA	16.56	siR320169	CTCTACTGGCTATGTCGTGAATAT	0.28
siR196101	ATTCGGATGGCACTTCAAGTGGAG	28.14	siR251031	CCACTTGAAGTGCCATCCGAATAG	0.07
siR198224	ATTGCAGTAGCTGAGTGTAGATAG	10.25	siR174913	ATCTACACTCAGCTACTGCAATAC	0.14
siR198885	ATTGGAACTTGGCAGCATATGGAG	12	siR253168	CCATATGCTGCCAAGTTCCAATGA	0.07
siR199265	ATTGGTAAAGTAGCATCTAGGTAT	26.53	siR76324	ACCTAGATGCTACTTTACCAATGA	0.07
siR199664	ATTGTATGAGTGGACTATCGGTTT	10.46	siR73093	ACCGATAGTCCACTCATACAATAG	0.07
siR200445	ATTTAACGACGCGGAATGAACGGA	31.58	siR306098	CGTTCATTCCGCGTCGTTAAATAC	0.42
siR200690	ATTTAGAACCGACGCCATAGATAA	12.56	siR175687	ATCTATGGCGTCGGTTCTAAATTT	0.07
siR203137	ATTTTCGGACTTACATGTGGTATT	98.6	siR455413	TACCACATGTAAGTCCGAAAATAC	0.14
siR203635	ATTTTTCTAAATGGCTGAATCGAC	11.23	siR286646	CGATTCAGCCATTTAGAAAAATAA	0.07
siR206012	CAAAGGGAAGGAATGGAGCAA	382.06	siR393338	GCTCCATTCCTTCCCTTTGTT	0.07
siR206085	CAAAGTACTGTGTGTATGCGTCAT	38.81	siR352643	GACGCATACACACAGTACTTTGAG	19.58
siR207707	CAACAGATCGGCATACCTCGCAAC	14.53	siR536720	TGCGAGGTATGCCGATCTGTTGTC	0.7
siR208998	CAACGACAAGGCTAGTGAGCGGAT	13.05	siR263235	CCGCTCACTAGCCTTGTCGTTGTA	0.42
siR209571	CAACGGTAGTAGGAAGGACAGTGT	16.91	siR96131	ACTGTCCTTCCTACTACCGTTGTT	0.07
siR210226	CAACTCTGAAGACGTGCTCCCGAT	11.09	siR297662	CGGGAGCACGTCTTCAGAGTTGAG	0.07
siR210613	CAACTTCTACGAGTTGTTGTCGGC	10.32	siR277835	CGACAACAACTCGTAGAAGTTGGG	0.42
siR211712	CAAGATCAAGACACATTAATTCGC	14.6	siR346708	GAATTAATGTGTCTTGATCTTGCT	0.07
siR212744	CAAGGAGCTAGAGCGACAGCGGCG	11.51	siR263437	CCGCTGTCGCTCTAGCTCCTTGGT	0.21
siR214322	CAATAGTGTTGATCGTGTCGGAAA	19.16	siR491353	TCCGACACGATCAACACTATTGCC	0.07
siR215743	CAATGTAGGTTTTAGAGGGGGTAT	15.23	siR70537	ACCCCCTCTAAAACCTACATTGTG	0.07
siR215785	CAATGTCGGACTGTTCAGTGTCAT	13.54	siR348083	GACACTGAACAGTCCGACATTGAA	2.11
siR216172	CAATTGGAAGAACACATATCACGT	11.86	siR431918	GTGATATGTGTTCTTCCAATTGTT	0.07
siR216240	CAATTGTTACAGGGAGGCTAGAGC	10.95	siR505289	TCTAGCCTCCCTGTAACAATTGTA	0.07
siR221282	CACCTCATCGTTGTCTTCGTCGTC	18.11	siR279368	CGACGAAGACAACGATGAGGTGAT	6.18
siR221716	CACCTTGATCCTCTGGAACGTCGC	15.3	siR354688	GACGTTCCAGAGGATCAAGGTGGC	0.07
siR223098	CACGGCTGTTGATCGTTGATGGTG	13.83	siR253264	CCATCAACGATCAACAGCCGTGAT	0.07
siR223123	CACGGGCACTGCATTCATACACGT	13.97	siR436589	GTGTATGAATGCAGTGCCCGTGCC	0.21
siR224460	CACTCGTCCAAGTAGAAGCAAGGT	35.51	siR334837	CTTGCTTCTACTTGGACGAGTGCA	0.21
siR224841	CACTGCTAGACTACAAGACGAGAT	35.16	siR319741	CTCGTCTTGTAGTCTAGCAGTGGT	21.69
siR225690	CAGAAAATTAGTGGATCTGGTCAT	12.35	siR349303	GACCAGATCCACTAATTTTCTGCA	0.07
siR225739	CAGAAAGACGCAACCGCACTCTAA	13.62	siR111637	AGAGTGCGGTTGCGTCTTTCTGCT	1.05
siR226011	CAGAACTGCTTGTATTATTCGGAC	15.72	siR259763	CCGAATAATACAAGCAGTTCTGAT	0.35
siR226041	CAGAAGAAAATAGAACAGCAACAT	11.09	siR442412	GTTGCTGTTCTATTTTCTTCTGTG	0.21
siR226050	CAGAAGAAGGAACAGAGCAGTGAA	15.3	siR224864	CACTGCTCTGTTCCTTCTTCTGCC	0.07
siR226242	CAGAAGTAGGCATATGGCAATCGA	12.49	siR372228	GATTGCCATATGCCTACTTCTGAA	0.07
siR226355	CAGAATGAGTAAGGGACAAATGGT	12.98	siR245850	CATTTGTCCCTTACTCATTCTGAG	0.07
siR226454	CAGACAAGCCAACGAAGACCTGAA	11.58	siR232244	CAGGTCTTCGTTGGCTTGTCTGTA	0.07
siR227789	CAGATCCTTTTGGTGTAGCTCGGT	109.55	siR283419	CGAGCTACACCAAAAGGATCTGAA	1.05
siR227828	CAGATCGGCATACCTCGCAACCGT	12.14	siR417863	GGTTGCGAGGTATGCCGATCTGTT	0.07
siR228079	CAGATGGTGTTGAAGGCGGATGAT	14.88	siR238430	CATCCGCCTTCAACACCATCTGGA	0.28
siR228183	CAGATTCGTAGAAAACCATGGCAA	49.9	siR382413	GCCATGGTTTTCTACGAATCTGAG	0.07
siR229010	CAGCCACCAGTAGTAATCGTCGTC	14.18	siR280252	CGACGATTACTACTGGTGGCTGCT	0.28
siR230660	CAGGAAAATAATGCAAGGGGCTAT	19.79	siR120913	AGCCCCTTGCATTATTTTCCTGGA	0.07
siR231691	CAGGGAAAAGCAGAAAGTGAATGT	11.16	siR194660	ATTCACTTTCTGCTTTTCCCTGAT	0.07
siR231782	CAGGGATCTCTTGGATGGAAGCAG	16.63	siR397148	GCTTCCATCCAAGAGATCCCTGAT	0.14
siR233435	CAGTGATCTGGTGTAGTTGTCGAT	31.02	siR277925	CGACAACTACACCAGATCACTGCT	1.05
siR234495	CATAATCACCATCACTATCGTCGT	11.44	siR351890	GACGATAGTGATGGTGATTATGAT	0.21
siR235052	CATACGTGCGTGTAGAGGGAGTTA	11.3	siR92241	ACTCCCTCTACACGCACGTATGCA	0.14
siR235081	CATACTACCTGCAAGAGCTGCATT	13.76	siR532260	TGCAGCTCTTGCAGGTAGTATGAT	0.56
siR235408	CATAGATCGTTGAGGCCACCA	14.53	siR434784	GTGGCCTCAACGATCTATGTA	0.7
siR235928	CATATCAGAGGAAAGAAGGTGGAA	12.84	siR250096	CCACCTTCTTTCCTCTGATATGGC	0.07
siR236704	CATCAATATCAAGAATCGTCGAGT	20.42	siR497855	TCGACGATTCTTGATATTGATGAT	0.07
siR237073	CATCAGAATTATTGTGCGGCTCAT	13.97	siR359398	GAGCCGCACAATAATTCTGATGGC	0.21
siR237319	CATCAGTTGGCCTAATAAGACGTT	11.44	siR303968	CGTCTTATTAGGCCAACTGATGGG	0.07
siR239474	CATCGTCGAACCGGCCAAAGGCAC	11.79	siR386673	GCCTTTGGCCGGTTCGACGATGAC	0.42
siR241237	CATGAAGTCTAATGTAGTAGCATA	15.58	siR538350	TGCTACTACATTAGACTTCATGAC	0.21
siR241368	CATGACGACGAACAGCCGATCGGT	11.51	siR285602	CGATCGGCTGTTCGTCGTCATGCT	0.07
siR241387	CATGACGGTAAGTGGGGATGTGTA	34.6	siR218617	CACATCCCCACTTACCGTCATGGT	0.84
siR241424	CATGACTGCTTTACGGGACGGAGT	17.33	siR493415	TCCGTCCCGTAAAGCAGTCATGTC	0.07
siR241700	CATGATTGTCATACTGATACGGTA	33.83	siR266554	CCGTATCAGTATGACAATCATGAA	0.07
siR242180	CATGCTACAGGACGAGAACAGGTA	16.49	siR273434	CCTGTTCTCGTCCTGTAGCATGAT	0.07
siR243359	CATGTCTCGTACTGTTATGTGCAT	62.74	siR375274	GCACATAACAGTACGAGACATGTG	0.14
siR243405	CATGTGAATGATGACGACAGATGA	20.63	siR178089	ATCTGTCGTCATCATTCACATGCT	0.07
siR244566	CATTCTAAACTTGTCAACTCGGAT	15.51	siR261442	CCGAGTTGACAAGTTTAGAATGAC	1.26
siR244908	CATTGATCAAGTGTAGTCGTGCAT	16.28	siR375760	GCACGACTACACTTGATCAATGAC	0.14
siR245183	CATTGGGACTCTGCATGCATGCAG	14.81	siR379826	GCATGCATGCAGAGTCCCAATGAT	0.07
siR245249	CATTGTACTTGTCGGTCTGGTCGG	15.02	siR349299	GACCAGACCGACAAGTACAATGAC	5.68
siR246115	CATTTTTTCTGTTGGTCGATCGAT	12.49	siR285489	CGATCGACCAACAGAAAAAATGGA	1.26
siR246253	CCAAAAGATAGCTTGACTCGGCAT	11.58	siR383940	GCCGAGTCAAGCTATCTTTTGGAG	0.63
siR246483	CCAAACGCTGGGCTGCGGAGATGG	23.23	siR176307	ATCTCCGCAGCCCAGCGTTTGGCT	0.07
siR246774	CCAAATTAAGAAACGTTGTCGGGT	13.54	siR259939	CCGACAACGTTTCTTAATTTGGTG	0.07
siR248747	CCAATGCGTGTGTCGTCTGTGGCC	12.49	siR249282	CCACAGACGACACACGCATTGGAG	0.98
siR250793	CCACTGACTGCAGAAGAGAGAGGT	25.48	siR320916	CTCTCTCTTCTGCAGTCAGTGGTA	0.07
siR250869	CCACTGCTAGACTACAAGACGAGA	13.33	siR502763	TCGTCTTGTAGTCTAGCAGTGGTC	1.26
siR252438	CCAGTAGAGGATTTGGCCGATGAG	16.84	siR239298	CATCGGCCAAATCCTCTACTGGCA	0.14
siR253281	CCATCAAGGACAAGTTTAGATCGG	24.63	siR367344	GATCTAAACTTGTCCTTGATGGTG	0.07
siR260932	CCGAGACAGACAGCATTGACGCAT	59.44	siR390446	GCGTCAATGCTGTCTGTCTCGGAC	0.14
siR261392	CCGAGTCGTAGTGAAGTGGAGGGC	18.6	siR270114	CCTCCACTTCACTACGACTCGGAC	1.89
siR263638	CCGGAACTAGAACCTGCAGACGGG	10.53	siR303874	CGTCTGCAGGTTCTAGTTCCGGTT	3.79
siR263893	CCGGAGATCGATGTTTGGAGCAGC	12	siR538969	TGCTCCAAACATCGATCTCCGGCA	4.35
siR264195	CCGGATTAGCAGACGAAACGCCAT	24.49	siR408004	GGCGTTTCGTCTGCTAATCCGGTG	0.14
siR265468	CCGGTAGGATGAAAGTTGATGGAT	10.67	siR253274	CCATCAACTTTCATCCTACCGGCA	0.28
siR271461	CCTCTCTGATACAGCAACAACCGG	10.25	siR418112	GGTTGTTGCTGTATCAGAGAGGGC	0.42
siR271711	CCTCTGTTTGTTGGCTAGTTGGAG	10.18	siR247480	CCAACTAGCCAACAAACAGAGGAA	0.28
siR271997	CCTGAACTCGTGGGTAGTATGGAC	11.86	siR252956	CCATACTACCCACGAGTTCAGGCA	0.07
siR274353	CCTTGACCAGGTAGAAGAAGACAG	20.28	siR430296	GTCTTCTTCTACCTGGTCAAGGGA	0.07
siR274803	CCTTTACGTGTTGAGCTGGGGCGG	44.92	siR382840	GCCCCAGCTCAACACGTAAAGGCA	0.07
siR276435	CGAACTGAATTGGGACATACGGTG	10.95	siR266593	CCGTATGTCCCAATTCAGTTCGGC	0.07
siR277809	CGACAAATTAGACTCGGAATCGGA	21.83	siR286692	CGATTCCGAGTCTAATTTGTCGGT	0.07
siR278075	CGACAATCGCAGTTGGGCTCGCAT	16.91	siR387501	GCGAGCCCAACTGCGATTGTCGCC	3.86
siR279671	CGACGACGAGCAACCCAAAACCAC	19.37	siR418477	GGTTTTGGGTTGCTCGTCGTCGCC	0.56
siR279920	CGACGAGATTGGTAAAAAGACAGC	19.51	siR558189	TGTCTTTTTACCAATCTCGTCGAT	0.35
siR279972	CGACGAGGAGGGAACATCGATGGC	15.09	siR239140	CATCGATGTTCCCTCCTCGTCGGC	0.42
siR280479	CGACGGAAGAACATACTCCATTGC	10.18	siR48006	AATGGAGTATGTTCTTCCGTCGAT	0.14
siR280865	CGACGGTGGCTTGAGCGTACACGG	11.23	siR436280	GTGTACGCTCAAGCCACCGTCGCC	0.21
siR281699	CGACTCTTGAACCCAAAGGAAGCA	12.21	siR332247	CTTCCTTTGGGTTCAAGAGTCGAA	0.07
siR281721	CGACTGACCAAGCAAAGCCCTGTA	25.76	siR231895	CAGGGCTTTGCTTGGTCAGTCGAA	1.05
siR282669	CGAGACTGAGACCAAGACATTCGG	52.07	siR346598	GAATGTCTTGGTCTCAGTCTCGGT	1.05
siR283006	CGAGATGGGAACTAATCGGCCGGT	13.4	siR295808	CGGCCGATTAGTTCCCATCTCGTC	0.14
siR283651	CGAGGAATCTGGGACTAAAGATGG	34.39	siR179528	ATCTTTAGTCCCAGATTCCTCGCC	0.07
siR283950	CGAGGCCAACCTGAGCATCGTCGT	33.34	siR352355	GACGATGCTCAGGTTGGCCTCGGG	0.07
siR285907	CGATGACACAGTGAAGACTCGCAT	25.48	siR387648	GCGAGTCTTCACTGTGTCATCGGA	1.19
siR285964	CGATGACGACGGAGGATGATGGCT	16.21	siR253461	CCATCATCCTCCGTCGTCATCGGT	0.42
siR286041	CGATGATCAGTTGTCGGAGCGGAC	25.55	siR263271	CCGCTCCGACAACTGATCATCGGC	0.07
siR286295	CGATGGCCGGCAGAATGTCCTCAT	11.3	siR360567	GAGGACATTCTGCCGGCCATCGAT	0.07
siR286901	CGATTGGGAGTCTCCGAGAAGATG	90.67	siR514987	TCTTCTCGGAGACTCCCAATCGGC	10.11
siR286976	CGATTTATATCGGTGATGACACGG	16.35	siR436750	GTGTCATCACCGATATAAATCGGG	0.07
siR287402	CGCAATCGGATAATGGCGAGGAAT	28.14	siR495022	TCCTCGCCATTATCCGATTGCGGT	0.07
siR292718	CGGAACCAAGCAGAAACCAAGCAA	49.9	siR397941	GCTTGGTTTCTGCTTGGTTCCGAT	0.07
siR292977	CGGAATCTAATACCTTGAAGGCAT	27.44	siR386402	GCCTTCAAGGTATTAGATTCCGGT	0.14
siR293095	CGGACACGTACAGAGATATGCGGA	10.6	siR288021	CGCATATCTCTGTACGTGTCCGAT	0.21
siR293236	CGGACCTAGAGTGTAACAAGCAGG	20.28	siR541183	TGCTTGTTACACTCTAGGTCCGTC	0.21
siR293645	CGGACTGAATTGGACCATACGGTG	15.02	siR266591	CCGTATGGTCCAATTCAGTCCGGC	0.07
siR293709	CGGACTTCTGCAGAAAGGCACCAA	23.58	siR416002	GGTGCCTTTCTGCAGAAGTCCGCT	2.39
siR294651	CGGATCTTTGCGCCTGATCGGAGG	15.44	siR491845	TCCGATCAGGCGCAAAGATCCGCG	0.14
siR295150	CGGCAATAGTGTTGATCGTGTCGG	10.67	siR347982	GACACGATCAACACTATTGCCGAT	0.07
siR296280	CGGCGATGAACTCGTGCAGGTGGT	10.11	siR221486	CACCTGCACGAGTTCATCGCCGGC	0.14
siR296308	CGGCGATGGCTAAGGAAGACTGGT	28.14	siR233285	CAGTCTTCCTTAGCCATCGCCGTT	0.56
siR297188	CGGCTTCAATGTCGGACTGTTCAG	62.32	siR340773	GAACAGTCCGACATTGAAGCCGAG	0.7
siR297681	CGGGAGCGGTATGGAGTATGTGAC	13.05	siR218344	CACATACTCCATACCGCTCCCGAA	0.14
siR298331	CGGGGTCAGCTAGGATGAAAAGGA	11.51	siR337636	CTTTTCATCCTAGCTGACCCCGAC	0.07
siR298466	CGGGTCATAGCTGGGACGGTTGAC	13.83	siR208645	CAACCGTCCCAGCTATGACCCGTG	0.07
siR298600	CGGGTTAGTAGGAACGCATGGTGC	11.79	siR69350	ACCATGCGTTCCTACTAACCCGGC	0.07
siR300606	CGGTTGGCAACAAGTGTAGGAGGG	22.04	siR317729	CTCCTACACTTGTTGCCAACCGCC	0.07
siR301898	CGTCAACAACGGTAGTAGGAAGGA	10.88	siR331983	CTTCCTACTACCGTTGTTGACGAA	0.14
siR304016	CGTCTTCGTACGGTTCCATGGCAT	13.05	siR382367	GCCATGGAACCGTACGAAGACGAG	0.84
siR304238	CGTGACAGGCCGATAGCACCACAG	11.44	siR435888	GTGGTGCTATCGGCCTGTCACGGT	3.02
siR311476	CTAGAGCTCGTAGAAGAAAGCAAT	43.93	siR541316	TGCTTTCTTCTACGAGCTCTAGAT	0.07
siR312576	CTAGTAGAATGTACGCTGTGTTAT	10.6	siR16179	AACACAGCGTACATTCTACTAGTC	0.28
siR313149	CTATAGACAATTGGGCTTGGCTAC	12.63	siR119751	AGCCAAGCCCAATTGTCTATAGAG	0.07
siR313942	CTATGATCTTAAGGTGAAGTGGCC	10.11	siR250980	CCACTTCACCTTAAGATCATAGTG	0.07
siR314252	CTATTAGTGACAAGTGTAGGCCGA	33.13	siR406373	GGCCTACACTTGTCACTAATAGAA	0.14
siR315794	CTCATCAAGCAGTAGACTAAGCAA	13.47	siR396871	GCTTAGTCTACTGCTTGATGAGAT	0.07
siR316695	CTCCATGCTGGACTGCAGTAGGCT	10.53	siR268888	CCTACTGCAGTCCAGCATGGAGGC	0.07
siR317290	CTCCGACTCCGACAGAAAGAACGG	20.77	siR441193	GTTCTTTCTGTCGGAGTCGGAGAG	0.07
siR318610	CTCGACCTGTCTGTAGTATAGCGG	11.02	siR392489	GCTATACTACAGACAGGTCGAGCA	0.07
siR318636	CTCGACGAGATTGGAGGTGGCTAT	62.88	siR119954	AGCCACCTCCAATCTCGTCGAGTT	0.91
siR319766	CTCGTGAGTGTAGCCAAGCAGCGA	51.86	siR395602	GCTGCTTGGCTACACTCACGAGAG	0.07
siR319950	CTCTAAACGTTGTAGAAGAAGCAG	40.78	siR397485	GCTTCTTCTACAACGTTTAGAGAA	0.07
siR320767	CTCTCGTGAGTGTAGCCAAGCAGC	39.86	siR541063	TGCTTGGCTACACTCACGAGAGAC	0.07
siR320923	CTCTCTGACAAATAACAACTGCAT	21.05	siR378548	GCAGTTGTTATTTGTCAGAGAGGA	0.14
siR323400	CTGACTTGACAGGGAACCTCGCGG	11.93	siR387610	GCGAGGTTCCCTGTCAAGTCAGAA	0.07
siR323769	CTGATAAGATGAAGACTGATGGCT	12	siR253418	CCATCAGTCTTCATCTTATCAGCA	0.07
siR324220	CTGATTGTGAAAGTGTGATGGAAA	17.69	siR488767	TCCATCACACTTTCACAATCAGAG	0.14
siR324730	CTGCATAGACGGTAGAGTAGGTAT	26.74	siR76245	ACCTACTCTACCGTCTATGCAGCA	0.77
siR325704	CTGCTCGGAGTTTGGTGATAGCGT	23.93	siR392574	GCTATCACCAAACTCCGAGCAGCT	0.07
siR326225	CTGGAAGTGCGGAATCGAGATGGT	44.28	siR240162	CATCTCGATTCCGCACTTCCAGTC	0.07
siR326608	CTGGATGAACCTGTTAGAGCAGAG	33.55	siR325721	CTGCTCTAACAGGTTCATCCAGTC	0.07
siR328058	CTGTCAAAGTAGAATGGAGGAGGT	18.11	siR317899	CTCCTCCATTCTACTTTGACAGAT	0.14
siR332601	CTTCGTAGATATCTTTGATGGCGA	14.81	siR382166	GCCATCAAAGATATCTACGAAGAC	0.07
siR333115	CTTCTCGGAGACTCCCAATCGGCG	64.78	siR262046	CCGATTGGGAGTCTCCGAGAAGAT	1.12
siR333983	CTTGACCAGAAGTAGAGACGAGAC	20.49	siR319710	CTCGTCTCTACTTCTGGTCAAGCC	0.07
siR334620	CTTGCGAAGGATTGTGTCAGTGGT	10.95	siR224648	CACTGACACAATCCTTCGCAAGTT	0.07
siR336229	CTTTACGTGTTGAGCTGGGGCGGC	12.56	siR288792	CGCCCCAGCTCAACACGTAAAGGC	0.21
siR338359	GAAAACACAGTAGGGGTAGAAGAG	13.4	siR332763	CTTCTACCCCTACTGTGTTTTCTA	0.21
siR338888	GAAAATTGTTGCATTAGTCAGGCT	13.62	siR272238	CCTGACTAATGCAACAATTTTCAC	0.14
siR339053	GAAACCACAAAGTAGATCATGGCA	13.9	siR254348	CCATGATCTACTTTGTGGTTTCGT	0.07
siR339537	GAAAGATTCAGCGTTGGGACCAAT	11.37	siR550946	TGGTCCCAACGCTGAATCTTTCCA	0.07
siR341825	GAACTACTGAACTGCTGAAGGTGG	27.16	siR78323	ACCTTCAGCAGTTCAGTAGTTCAG	0.35
siR342770	GAAGACGAAGTTAGAGGACTCAGG	11.44	siR526731	TGAGTCCTCTAACTTCGTCTTCAA	0.07
siR342790	GAAGACGACGAAGACAACGATGAG	34.74	siR239603	CATCGTTGTCTTCGTCGTCTTCAA	1.54
siR344361	GAAGGCTGCCTGAGCGGACGCGCT	41.83	siR290995	CGCGTCCGCTCAGGCAGCCTTCCG	0.07
siR344938	GAAGTCTTTATGTAGGGCAGGTAT	23.23	siR77687	ACCTGCCCTACATAAAGACTTCAC	0.07
siR344940	GAAGTGAATGTAGGCATGCCACAT	21.55	siR434701	GTGGCATGCCTACATTCACTTCAG	0.28
siR345913	GAATCGGACGTCAATATCGGCATA	30.25	siR535325	TGCCGATATTGACGTCCGATTCGT	0.07
siR346212	GAATGACGAATTAGCACCAGACAA	20.63	siR429781	GTCTGGTGCTAATTCGTCATTCAG	0.07
siR348878	GACATGACTGCTTTACGGGACGGA	23.65	siR302659	CGTCCCGTAAAGCAGTCATGTCAG	0.35
siR349282	GACCACTGCTAGACTACAAGACGA	16.28	siR430479	GTCTTGTAGTCTAGCAGTGGTCAT	0.35
siR353035	GACGGAAGAGTATGCACACAACGT	12.77	siR443402	GTTGTGTGCATACTCTTCCGTCGT	1.05
siR353343	GACGGCAACAAGTAAGCTACTCAC	15.93	siR363030	GAGTAGCTTACTTGTTGCCGTCAG	0.77
siR354392	GACGTCATCAAAGGGACTGGTGGG	10.18	siR219791	CACCAGTCCCTTTGATGACGTCAG	0.14
siR356253	GACTTTCGGGTTGTCGGTGACGGG	39.72	siR302070	CGTCACCGACAACCCGAAAGTCAT	0.07
siR356536	GAGAAATGTCGGGCTGCAGCGGCT	43.79	siR263375	CCGCTGCAGCCCGACATTTCTCGC	1.12
siR356635	GAGAACGGGCGGCAAAGAAGACAC	12.56	siR430316	GTCTTCTTTGCCGCCCGTTCTCAT	0.07
siR357450	GAGACTGAGACCAAGACATTCGGT	15.72	siR277570	CGAATGTCTTGGTCTCAGTCTCGG	0.28
siR358507	GAGATGTATGCGGTTGGATGGTGT	11.93	siR68975	ACCATCCAACCGCATACATCTCAT	0.49
siR360123	GAGCTGGAGGACACAACATTCGAG	25.27	siR277578	CGAATGTTGTGTCCTCCAGCTCCT	0.07
siR360142	GAGCTGTACTCTGCATGTCTGCGG	14.46	siR376670	GCAGACATGCAGAGTACAGCTCAT	0.07
siR360162	GAGCTGTGTGTGACTGACGGCGAG	13.62	siR289478	CGCCGTCAGTCACACACAGCTCAC	0.07
siR360529	GAGGACACAACATTCGAGGAGGCG	28.7	siR270577	CCTCCTCGAATGTTGTGTCCTCCA	0.07
siR360683	GAGGACGAGAAATGTTGGCAA	25.12	siR380858	GCCAACATTTCTCGTCCTCTC	0.14
siR361114	GAGGATCAGAGGAGCATCTCGGCA	16.14	siR261066	CCGAGATGCTCCTCTGATCCTCGG	0.49
siR362059	GAGGGCTTGACCAGAAGTAGAGAC	26.81	siR320174	CTCTACTTCTGGTCAAGCCCTCGG	0.84
siR363815	GAGTGTAGAATTGGCAAATTGGAG	25.55	siR248931	CCAATTTGCCAATTCTACACTCAG	0.07
siR364153	GAGTTGTAGATGAAGGCAGTGGAG	65.76	siR250856	CCACTGCCTTCATCTACAACTCGG	0.21
siR365464	GATATATATATCGACGGTGAGAAG	11.02	siR506513	TCTCACCGTCGATATATATATCTC	0.07
siR365610	GATATCTTTTCTTGCATCGTTGGT	18.88	siR209226	CAACGATGCAAGAAAAGATATCTA	0.07
siR365614	GATATGAACGATGTCGGATCCACC	51.86	siR544560	TGGATCCGACATCGTTCATATCAT	0.14
siR367580	GATCTCGACATGGACGGCCTAGAT	10.46	siR312334	CTAGGCCGTCCATGTCGAGATCGA	0.28
siR368190	GATGAACTAGTAGAAGGACAGAAT	19.23	siR512601	TCTGTCCTTCTACTAGTTCATCCT	0.07
siR368202	GATGAAGAACATGACAAGGCAGGA	11.16	siR325222	CTGCCTTGTCATGTTCTTCATCTC	0.07
siR368632	GATGAGATGACCAGGAGACTTGAA	17.19	siR213629	CAAGTCTCCTGGTCATCTCATCGG	0.42
siR368641	GATGAGATGTATGCGGTTGGATGG	11.79	siR167556	ATCCAACCGCATACATCTCATCTT	0.49
siR368796	GATGAGTGGTCGATCTGTTTGGAT	22.67	siR246382	CCAAACAGATCGACCACTCATCAT	0.28
siR369613	GATGCTTGGTTGGATGTGTGCATA	21.55	siR531148	TGCACACATCCAACCAAGCATCAT	0.14
siR369696	GATGGACAATGGATAGAAGAGGAG	14.67	siR271791	CCTCTTCTATCCATTGTCCATCAG	0.07
siR370766	GATGTCGATTGAATGTCCATGGCT	12.35	siR254546	CCATGGACATTCAATCGACATCGC	0.07
siR371249	GATGTTTGCATATGGTCGTCTGGT	21.33	siR226755	CAGACGACCATATGCAAACATCTT	2.67
siR371932	GATTCTCATCTAATCGGACCACAT	11.16	siR435709	GTGGTCCGATTAGATGAGAATCAG	0.21
siR374650	GCAATAGATCAGAACATGCCGGTG	16.84	siR264457	CCGGCATGTTCTGATCTATTGCAG	5.68
siR376544	GCAGAACTCCTCCATCGCCGGCAT	14.95	siR384726	GCCGGCGATGGAGGAGTTCTGCTA	0.14
siR376553	GCAGAACTTCTGGATGGTAGAGAA	33.2	siR320090	CTCTACCATCCAGAAGTTCTGCAA	0.63
siR376783	GCAGAGAAGGAACAAGGAGGACAG	17.76	siR427183	GTCCTCCTTGTTCCTTCTCTGCTT	0.07
siR378826	GCATAGCATCGAGATGGAGAGCAG	11.93	siR394085	GCTCTCCATCTCGATGCTATGCAG	0.07
siR386941	GCGAATCTAGAGCTCGTAGAAGAA	41.06	siR332773	CTTCTACGAGCTCTAGATTCGCAC	0.07
siR389645	GCGGGACTGACTCGGTCGCACGGA	14.74	siR304743	CGTGCGACCGAGTCAGTCCCGCAT	0.98
siR392379	GCTAGTGCAGGGCAGAGTAGGGTC	10.39	siR258152	CCCTACTCTGCCCTGCACTAGCAA	0.28
siR394457	GCTCTTGTTTGATCAGTATCGGGT	17.62	siR261502	CCGATACTGATCAAACAAGAGCAA	1.47
siR394910	GCTGATAAGATGAAGACTGATGGC	12.56	siR237282	CATCAGTCTTCATCTTATCAGCAT	0.14
siR395372	GCTGCGACATGGAAAGATGATGGA	11.65	siR237577	CATCATCTTTCCATGTCGCAGCTC	0.07
siR395500	GCTGCTCTGAACTGAAAAGATGGT	23.16	siR241100	CATCTTTTCAGTTCAGAGCAGCAG	0.21
siR395595	GCTGCTTGACTGGTGATCCGACGG	38.32	siR428234	GTCGGATCACCAGTCAAGCAGCTG	0.07
siR397920	GCTTGGTGGAAGAACAAGGAG	39.37	siR274755	CCTTGTTCTTCCACCAAGCGT	0.14
siR399481	GGAAGGCTGCCTGAGCGGACGCGC	11.44	siR390525	GCGTCCGCTCAGGCAGCCTTCCGC	0.14
siR402240	GGAGGAGTTCTGCTAGGAAGGCTG	63.44	siR386449	GCCTTCCTAGCAGAACTCCTCCAT	0.63
siR402665	GGAGTCAGTGCGAGCGATGATGGT	11.79	siR237516	CATCATCGCTCGCACTGACTCCCC	0.07
siR402949	GGAGTTCTGCTAGGAAGGCTGCTG	14.53	siR377358	GCAGCCTTCCTAGCAGAACTCCTC	0.14
siR404528	GGCAATAGTGTTGATCGTGTCGGA	10.18	siR278197	CGACACGATCAACACTATTGCCGA	0.07
siR408020	GGCTAAATCTCCGACACTGAAGAC	13.97	siR331205	CTTCAGTGTCGGAGATTTAGCCAC	0.07
siR408685	GGCTGTTGATCGTTGATGGTGTTC	12.14	siR57580	ACACCATCAACGATCAACAGCCGT	0.07
siR412384	GGGTAGACGATATGCAACAGGCAC	18.39	siR386331	GCCTGTTGCATATCGTCTACCCAC	1.05
siR412822	GGGTGGGTAGACGATATGCAACAG	12.28	siR442074	GTTGCATATCGTCTACCCACCCGT	0.21
siR416645	GGTGGTGTTGCTGAAGTATGACGG	55.09	siR425128	GTCATACTTCAGCAACACCACCGT	0.07
siR420299	GTACGATTGATCTTGAGTTGCTGC	10.6	siR116495	AGCAACTCAAGATCAATCGTACAC	0.91
siR422696	GTATAATAGATCAACTGACGGTGT	12.63	siR75325	ACCGTCAGTTGATCTATTATACGC	0.07
siR427462	GTCCTTGATGGTGGTAGTAGGGCA	10.6	siR258143	CCCTACTACCACCATCAAGGACAA	0.21
siR428852	GTCTAGAACACTGCAGGTGCCGCC	18.46	siR295257	CGGCACCTGCAGTGTTCTAGACTA	0.07
siR429810	GTCTGTAGCTCGGAGATGAAGGAG	11.65	siR273839	CCTTCATCTCCGAGCTACAGACTC	0.07
siR429925	GTCTGTTGTGTGGGGATGGTAGGA	24.49	siR309474	CTACCATCCCCACACAACAGACAC	0.07
siR431223	GTGACCCGGCTGAAGTGCATCAAG	18.18	siR528675	TGATGCACTTCAGCCGGGTCACAT	0.21
siR434021	GTGGACGGCTCAAGCGACGATGGT	19.79	siR239490	CATCGTCGCTTGAGCCGTCCACTG	0.14
siR434301	GTGGATAACTAACTGGATGGCATT	24.7	siR534490	TGCCATCCAGTTAGTTATCCACAA	0.07
siR435338	GTGGGTAGACGATATGCAACAGGC	13.83	siR329243	CTGTTGCATATCGTCTACCCACCC	0.07
siR436274	GTGTACGATTGAAGTGAATGCGCA	17.4	siR288219	CGCATTCACTTCAATCGTACACAC	0.42
siR438243	GTGTTGGTAATGTAGATTAGATGG	23.86	siR174826	ATCTAATCTACATTACCAACACCA	0.21
siR438601	GTTAAGTTGATAGTCAGTGGATGG	10.25	siR168172	ATCCACTGACTATCAACTTAACCT	0.07
siR439125	GTTAGGAACATTGTGGCATGGCAT	24.98	siR382339	GCCATGCCACAATGTTCCTAACCG	0.07
siR442770	GTTGGTATGGCTTAGTGGTAACGG	48.64	siR438795	GTTACCACTAAGCCATACCAACCC	0.35
siR443340	GTTGTGCTTCAGAACCAAGGCGTC	15.79	siR289956	CGCCTTGGTTCTGAAGCACAACAC	0.35
siR445240	GTTTGTTGAGACTTGTAGGGAGGC	11.93	siR317027	CTCCCTACAAGTCTCAACAAACAT	0.14
siR446272	TAAAATATATTCATGGTCGTCTGT	16.42	siR106054	AGACGACCATGAATATATTTTAGT	0.42
siR448001	TAACATCAGAATGCAGGGACT	14.95	siR490886	TCCCTGCATTCTGATGTTACA	0.14
siR449232	TAAGAAGACTCTACCGGTGACGCT	10.32	siR302072	CGTCACCGGTAGAGTCTTCTTAGT	0.07
siR449326	TAAGACATCCAAGCATACTCTCGA	13.19	siR357966	GAGAGTATGCTTGGATGTCTTATG	0.07
siR450192	TAAGCTCCATCGATCCAGGACATA	12	siR556784	TGTCCTGGATCGATGGAGCTTAAG	0.07
siR450846	TAAGTGAGACTCTCAAACGGCTAT	12	siR121954	AGCCGTTTGAGAGTCTCACTTACT	0.07
siR451899	TAATGCAGATGCTTGGGACGGTGA	11.23	siR75358	ACCGTCCCAAGCATCTGCATTAAA	0.21
siR453353	TACAATGACGGCGACCTCTTCCAC	17.48	siR399289	GGAAGAGGTCGCCGTCATTGTACT	0.14
siR455951	TACCCACTTGTTTTGAACCGTCGG	11.3	siR354153	GACGGTTCAAAACAAGTGGGTAGA	0.35
siR456118	TACCCGACTGCGCTAAGACTGCCT	11.58	siR378299	GCAGTCTTAGCGCAGTCGGGTATT	0.77
siR456869	TACCTACAGGACACAAGATTGGCT	22.39	siR248676	CCAATCTTGTGTCCTGTAGGTATT	0.28
siR459365	TACTAGAGCTTGGAACAATGAAGA	10.04	siR573174	TTCATTGTTCCAAGCTCTAGTACC	0.07
siR461886	TAGACATTTCAGAGAACAACGGAA	17.26	siR267992	CCGTTGTTCTCTGAAATGTCTATA	0.07
siR461987	TAGACGAGATTGTGCATAGCCTAC	10.32	siR134037	AGGCTATGCACAATCTCGTCTATG	0.14
siR462273	TAGAGACTGCAAGATAAGGACTGC	15.16	siR143654	AGTCCTTATCTTGCAGTCTCTAGT	0.07
siR462951	TAGATGGAACCGAAAGCCTGAGGA	11.3	siR315587	CTCAGGCTTTCGGTTCCATCTAAC	0.14
siR463700	TAGCATGACTGCAATGATGAAGGG	10.25	siR331288	CTTCATCATTGCAGTCATGCTACT	0.07
siR464349	TAGCGCGATGACGGACGAAAACGC	14.39	siR445490	GTTTTCGTCCGTCATCGCGCTAAT	0.07
siR464379	TAGCGGACTTCTGCAGAAAGGCAC	38.46	siR386657	GCCTTTCTGCAGAAGTCCGCTATT	0.35
siR465728	TAGGCAGTGACAAGTGAAGAACAA	53.34	siR441086	GTTCTTCACTTGTCACTGCCTATG	0.14
siR469615	TATAGCCACCTCCAATCTCGTCGA	11.44	siR351506	GACGAGATTGGAGGTGGCTATAGA	4.21
siR473310	TATGGATAGATGGCACTGGTATGT	15.79	siR154193	ATACCAGTGCCATCTATCCATACC	0.28
siR473409	TATGGCTTAGTGGTAACGGAAAAT	11.79	siR596059	TTTCCGTTACCACTAAGCCATACC	0.07
siR475570	TATTTCATTTTCTGTTGGCAATAT	12.07	siR198307	ATTGCCAACAGAAAATGAAATATA	0.14
siR475734	TATTTGCATATAAGAGATCTGGGT	10.53	siR251542	CCAGATCTCTTATATGCAAATATT	0.07
siR477102	TCAACCATAGTAGGAACTAGA	19.72	siR468457	TAGTTCCTACTATGGTTGAAC	0.14
siR477790	TCAAGATTGTAGAGCCGGCCCTGC	11.02	siR135737	AGGGCCGGCTCTACAATCTTGAGG	4.84
siR478529	TCAATCTCCTTTTGTCGGTCC	19.37	siR72312	ACCGACAAAAGGAGATTGAGA	0.28
siR479024	TCACAATAGAATGGCAAGAGCATC	12.07	siR539564	TGCTCTTGCCATTCTATTGTGATC	0.07
siR480058	TCACCTCATCGTTGTCTTCGTCGT	13.19	siR350489	GACGAAGACAACGATGAGGTGATG	0.42
siR480441	TCACGGTTGTAGCATGGGGTGGAT	17.69	siR249731	CCACCCCATGCTACAACCGTGACA	0.07
siR482095	TCAGCGCTCGGTATACTTTACATC	14.04	siR553217	TGTAAAGTATACCGAGCGCTGAGT	0.07
siR482859	TCAGTATCACAAGCCATGTAGCAT	58.11	siR391660	GCTACATGGCTTGTGATACTGAGA	0.07
siR483523	TCATACTACCTGCAAGAGCTGCAT	30.04	siR377523	GCAGCTCTTGCAGGTAGTATGATT	0.07
siR485011	TCATGAAGTCTAATGTAGTAGCAT	24.42	siR391863	GCTACTACATTAGACTTCATGACT	0.07
siR485127	TCATGATTGTCATACTGATACGGT	13.47	siR301730	CGTATCAGTATGACAATCATGAAG	0.07
siR485493	TCATGTAGACGACGATACTCTCAT	28	siR357961	GAGAGTATCGTCGTCTACATGAGC	0.35
siR486102	TCATTGGTAAAGTAGCATCTAGGT	13.83	siR311642	CTAGATGCTACTTTACCAATGACG	0.07
siR486115	TCATTGGTTGTTCGTGAGCGTCGT	22.67	siR352860	GACGCTCACGAACAACCAATGACG	2.11
siR491244	TCCGAAGAGCTAGAAGTTTGTCAT	28	siR347208	GACAAACTTCTAGCTCTTCGGATC	0.42
siR491249	TCCGAAGAGCTGGAAGTTTGTCAT	19.02	siR347205	GACAAACTTCCAGCTCTTCGGATC	0.49
siR491502	TCCGACGCGAACTGGATGAGGCCG	14.46	siR385745	GCCTCATCCAGTTCGCGTCGGAGG	0.21
siR493088	TCCGGTTTTCAGTTGATTTGGCAC	32.21	siR380793	GCCAAATCAACTGAAAACCGGAAA	0.14
siR495963	TCCTGGTAGTAGCAGTACACTGAG	10.32	siR233623	CAGTGTACTGCTACTACCAGGAAT	0.21
siR497403	TCGACAACTACACCAGATCACTGC	11.86	siR145680	AGTGATCTGGTGTAGTTGTCGATA	4.77
siR498092	TCGACTCTTGAACCCAAAGGAAGC	10.39	siR575886	TTCCTTTGGGTTCAAGAGTCGAAT	0.42
siR498095	TCGACTGACCAAGCAAAGCCCTGT	12.56	siR136028	AGGGCTTTGCTTGGTCAGTCGAAA	0.28
siR498153	TCGACTTAAGCGGTAGATCTTGGA	12.63	siR211781	CAAGATCTACCGCTTAAGTCGACA	0.42
siR499828	TCGCGCATGTGGGTGTGGGACGGG	10.25	siR302588	CGTCCCACACCCACATGCGCGAGC	0.07
siR500846	TCGGCAGATCGTAGAAGATGGCAG	13.97	siR382299	GCCATCTTCTACGATCTGCCGACG	0.07
siR501245	TCGGGATTGAGAACAAAACCGCAT	36.99	siR390257	GCGGTTTTGTTCTCAATCCCGAAC	0.07
siR501783	TCGGTTATGAGATTGGGCACA	42.32	siR534730	TGCCCAATCTCATAACCGATG	0.07
siR503595	TCTAAACTCCTACGGCTCAAGAAT	12.49	siR515436	TCTTGAGCCGTAGGAGTTTAGATT	0.84
siR504954	TCTAGAACACTGTAGGTGCCGCCA	10.81	siR389251	GCGGCACCTACAGTGTTCTAGACT	0.07
siR505080	TCTAGAGCTCGTAGAAGAAAGCAA	52.71	siR398316	GCTTTCTTCTACGAGCTCTAGATT	0.14
siR505310	TCTAGCGACGATGGTTCTCGGCAT	11.86	siR383821	GCCGAGAACCATCGTCGCTAGAGC	0.28
siR508209	TCTCGATCAGATGGTGTGTGGCAT	10.11	siR381194	GCCACACACCATCTGATCGAGAGG	0.07
siR508416	TCTCGGAGACTCCCAATCGGCGCA	17.26	siR289234	CGCCGATTGGGAGTCTCCGAGAAG	0.14
siR509134	TCTCTCGTGAGTGTAGCCAAGCAG	12.98	siR397887	GCTTGGCTACACTCACGAGAGACG	0.07
siR509360	TCTCTGATTGTGAAAGTGTGATGG	19.37	siR164353	ATCACACTTTCACAATCAGAGAAT	0.14
siR509926	TCTGAACCTTGAGCATCTTACGTT	23.58	siR301033	CGTAAGATGCTCAAGGTTCAGACA	0.07
siR509984	TCTGAAGTCGACGAAGAACAGCCA	15.09	siR396538	GCTGTTCTTCGTCGACTTCAGAGA	0.07
siR510057	TCTGAATTCGTAGCACAACTGCAT	24.14	siR378547	GCAGTTGTGCTACGAATTCAGATT	0.07
siR510103	TCTGACACCGTATAGAATAAGCAA	17.9	siR396992	GCTTATTCTATACGGTGTCAGAAA	0.07
siR510469	TCTGAGGTCACAAGTTTTGAATGC	68.43	siR194284	ATTCAAAACTTGTGACCTCAGATG	0.77
siR510574	TCTGATCAGGCGTAAGGATCCGCG	15.86	siR294508	CGGATCCTTACGCCTGATCAGATG	0.28
siR511710	TCTGGAGCTCGTAGATGAAGGAGT	35.23	siR496285	TCCTTCATCTACGAGCTCCAGACT	0.21
siR512472	TCTGTCAGGAGAACCAGCAAAGGA	80.85	siR337203	CTTTGCTGGTTCTCCTGACAGAAG	0.21
siR512475	TCTGTCAGGATAAGCTATGTGGGC	26.53	siR249377	CCACATAGCTTATCCTGACAGAAG	0.21
siR513559	TCTTAGCACGTAGAGACAATTCAC	20.77	siR346973	GAATTGTCTCTACGTGCTAAGAGG	0.07
siR515742	TCTTGCTCTGGCATGCGTGAGGCG	10.74	siR269753	CCTCACGCATGCCAGAGCAAGAGA	0.07
siR516226	TCTTGTGCTGCTGAAGAGACT	18.39	siR509567	TCTCTTCAGCAGCACAAGAAG	0.07
siR517838	TGAAATATACCGTCGATCTCGCAC	68.29	siR387448	GCGAGATCGACGGTATATTTCAGC	0.14
siR517905	TGAAATGCAGCTGCGACTTTGGTT	47.51	siR246651	CCAAAGTCGCAGCTGCATTTCATG	0.07
siR518557	TGAACGTGAGACGAACTAATGTAT	13.62	siR65123	ACATTAGTTCGTCTCACGTTCAAT	0.07
siR518599	TGAACTACTGAACTGCTGAAGGTG	17.4	siR273800	CCTTCAGCAGTTCAGTAGTTCAGC	0.07
siR518752	TGAACTGGTTCAAGGAGATCTGCC	10.11	siR227873	CAGATCTCCTTGAACCAGTTCATC	0.07
siR518878	TGAAGAACTACAGAGGAGAGCAGA	16.28	siR539392	TGCTCTCCTCTGTAGTTCTTCAAG	0.07
siR519367	TGAAGCTTGCAGTTCTGATTCATT	14.25	siR520003	TGAATCAGAACTGCAAGCTTCATT	9.4
siR519483	TGAAGGGGAATGGCACTGCTCGTC	23.79	siR283219	CGAGCAGTGCCATTCCCCTTCAGG	0.07
siR520241	TGAATGACGAATTAGCACCAGACA	16.98	siR512123	TCTGGTGCTAATTCGTCATTCAGG	0.14
siR520382	TGAATGTAGATAGATCAAGGCTCT	13.54	siR122686	AGCCTTGATCTATCTACATTCAGA	0.07
siR520636	TGAATTTCTTGACAGTTGACACAT	22.67	siR436681	GTGTCAACTGTCAAGAAATTCACT	0.07
siR520699	TGACAAACTTCTAGCTCTTCGGAT	22.88	siR259639	CCGAAGAGCTAGAAGTTTGTCATC	0.84
siR520725	TGACAAATGATGTCCCATCGTCGC	16	siR352414	GACGATGGGACATCATTTGTCAGG	0.07
siR520844	TGACAAGTGTAGGCCGACAATCTA	10.32	siR372490	GATTGTCGGCCTACACTTGTCACT	0.35
siR521339	TGACAGTATGTTGACTAGCTGGCC	12.84	siR251909	CCAGCTAGTCAACATACTGTCAAT	0.07
siR521872	TGACCAGAAGTAGAGACGAGACAC	146.96	siR429369	GTCTCGTCTCTACTTCTGGTCAAG	0.07
siR522352	TGACCTGGTATTGTATGAAAGGAT	19.23	siR274851	CCTTTCATACAATACCAGGTCAGT	0.07
siR523610	TGACTACTCTTGTAGAAGCTTCAT	10.04	siR344033	GAAGCTTCTACAAGAGTAGTCAAT	0.07
siR524005	TGACTGCTTTACGGGACGGAGTGT	25.41	siR92379	ACTCCGTCCCGTAAAGCAGTCATG	0.28
siR524086	TGACTGTTTACGGATCAATTGCAA	38.6	siR374920	GCAATTGATCCGTAAACAGTCAGT	0.07
siR524713	TGAGACGGAGGGAATACATTAGTG	20	siR308474	CTAATGTATTCCCTCCGTCTCAAA	0.07
siR525341	TGAGCAGAATAGAAAGGAACCACC	13.33	siR552481	TGGTTCCTTTCTATTCTGCTCATT	0.14
siR526162	TGAGGCAATGGAGGAAGAGATGAT	10.25	siR240324	CATCTCTTCCTCCATTGCCTCAAC	0.07
siR526398	TGAGGTCACAAGTTTTGAATGCCA	12.77	siR380345	GCATTCAAAACTTGTGACCTCAGA	0.42
siR526574	TGAGTACTGTATAAGCCAAAGTGG	20.07	siR99323	ACTTTGGCTTATACAGTACTCATA	0.14
siR526591	TGAGTAGATGGCGAACGCAGCACA	42.6	siR540002	TGCTGCGTTCGCCATCTACTCACG	0.07
siR527544	TGATATGAACACAAGGGCGGATAG	12.07	siR170170	ATCCGCCCTTGTGTTCATATCATG	0.07
siR527774	TGATCATCTAGAAGTCTTGGGCAT	18.32	siR382623	GCCCAAGACTTCTAGATGATCATC	0.07
siR528855	TGATGCTTGGTTGGATGTGTGCAT	100.22	siR375125	GCACACATCCAACCAAGCATCATG	0.07
siR529707	TGATTCTTTGTAGACGAGCACAGC	13.26	siR559473	TGTGCTCGTCTACAAAGAATCATG	0.07
siR530121	TGATTTGTATGAGTGAAGATTGAC	22.6	siR215186	CAATCTTCACTCATACAAATCATT	0.14
siR531800	TGCAGAACTTCTGGATGGTAGAGA	17.19	siR504383	TCTACCATCCAGAAGTTCTGCAAC	0.42
siR531824	TGCAGAAGTTGTGAAAAGTGGAGC	14.67	siR487967	TCCACTTTTCACAACTTCTGCATA	0.07
siR532547	TGCAGTAGCTGAGTGTAGATAGAC	18.53	siR313679	CTATCTACACTCAGCTACTGCAAT	0.14
siR537363	TGCGGCAGTGGATTGGTCACGCAT	14.74	siR390685	GCGTGACCAATCCACTGCCGCATA	0.21
siR537868	TGCGTGCAGTAGAAGTAGATGGTA	16	siR253992	CCATCTACTTCTACTGCACGCAAC	0.07
siR538552	TGCTAGGCTTGGGAACATGTGCAG	12.14	siR375370	GCACATGTTCCCAAGCCTAGCAAC	0.35
siR538613	TGCTAGTGCAGGGCAGAGTAGGGT	10.81	siR268867	CCTACTCTGCCCTGCACTAGCAAC	0.14
siR540918	TGCTTGACTGGTGATCCGACGGTT	20.84	siR267023	CCGTCGGATCACCAGTCAAGCAGC	2.81
siR541601	TGGAAATAGAAATCATACAGGCAA	18.32	siR386236	GCCTGTATGATTTCTATTTCCAAG	0.07
siR542022	TGGAAGGCAAGATCTGACGGACAG	27.51	siR426926	GTCCGTCAGATCTTGCCTTCCATG	0.07
siR542036	TGGAAGGTATGTGAAGAAAGGATA	19.16	siR496737	TCCTTTCTTCACATACCTTCCAAC	0.07
siR542130	TGGAATAATGGAAGGATGTAGCGG	13.54	siR391644	GCTACATCCTTCCATTATTCCATC	0.07
siR542468	TGGACACTGCGGATGGACACCAGA	13.54	siR552140	TGGTGTCCATCCGCAGTGTCCAGC	0.14
siR542476	TGGACACTTCTGTCAGGAGAACCA	23.02	siR440866	GTTCTCCTGACAGAAGTGTCCATT	0.49
siR543146	TGGACTCTTCACAGGTATACTGAC	22.32	siR232748	CAGTATACCTGTGAAGAGTCCATG	0.35
siR543162	TGGACTGCAGTAGGCTGCCGAAGC	20.21	siR576784	TTCGGCAGCCTACTGCAGTCCAGC	0.07
siR544199	TGGAGTTGGGTACGTAAACAGAAG	14.39	siR513213	TCTGTTTACGTACCCAACTCCATG	0.14
siR544360	TGGATAGTCTAACTGCATGGTGAT	15.65	siR219963	CACCATGCAGTTAGACTATCCATA	1.26
siR544431	TGGATATTGCTGAAGCCGTAG	56.71	siR85386	ACGGCTTCAGCAATATCCATG	0.07
siR546791	TGGCGAGGAGCGTGTGGAAGCGGT	11.3	siR292262	CGCTTCCACACGCTCCTCGCCAAG	0.07
siR547385	TGGCTCCGTGCTTGATTGTTGGTC	13.97	siR246906	CCAACAATCAAGCACGGAGCCATG	0.35
siR548126	TGGGACCTGCGCAAGATCGTGATG	15.09	siR480272	TCACGATCTTGCGCAGGTCCCAGG	0.07
siR548174	TGGGACGGCATCTCTCTCTGTGCG	10.88	siR217936	CACAGAGAGAGATGCCGTCCCACA	0.21
siR549068	TGGGCTATGAAGGGTACTTAAGAT	16.35	siR329663	CTTAAGTACCCTTCATAGCCCATC	0.07
siR549075	TGGGCTCATATAAGTAGACGCGGT	27.3	siR291048	CGCGTCTACTTATATGAGCCCATG	0.07
siR549583	TGGGTAGACGATATGCAACAGGCA	10.88	siR273459	CCTGTTGCATATCGTCTACCCACC	0.21
siR549891	TGGGTGGAACCGAAAGCCTGAGGA	11.79	siR315584	CTCAGGCTTTCGGTTCCACCCAAC	0.07
siR550508	TGGTAGGTGTATGCAGTTGGGCAG	11.72	siR382610	GCCCAACTGCATACACCTACCAAA	0.07
siR550636	TGGTATGGCTTAGTGGTAACGGAA	26.6	siR267680	CCGTTACCACTAAGCCATACCAAC	0.14
siR550890	TGGTCATTGATCAAGTGTAGTCGT	12.98	siR354850	GACTACACTTGATCAATGACCAAG	0.07
siR551694	TGGTGATGTTCTTCCGGCGG	91.52	siR384423	GCCGGAAGAACATCACCAGG	0.07
siR551695	TGGTGATGTTCTTCCGGCGGG	2225.36	siR289326	CGCCGGAAGAACATCACCAGG	0.07
siR551828	TGGTGCTAGTTGGATCGTACAGAC	25.41	siR327801	CTGTACGATCCAACTAGCACCACA	0.07
siR553319	TGTAACTTGTGATCGATGTGGTGT	11.51	siR67210	ACCACATCGATCACAAGTTACAAG	0.14
siR554375	TGTAGCTGAAGTGAATGTAGGCAT	49.83	siR385449	GCCTACATTCACTTCAGCTACATC	0.14
siR555745	TGTCAGGATAAGCTATGTGGGCAA	22.39	siR382659	GCCCACATAGCTTATCCTGACAGA	0.14
siR556213	TGTCCAGATTCGTAGTCCAAGGTT	13.12	siR274543	CCTTGGACTACGAATCTGGACAAG	0.07
siR558401	TGTGACACGACAGATGATTGACAT	15.93	siR424186	GTCAATCATCTGTCGTGTCACAAA	0.07
siR558449	TGTGACCCGGCTGAAGTGCATCAA	33.06	siR369182	GATGCACTTCAGCCGGGTCACATG	0.07
siR559539	TGTGCTTCAGAACCAAGGCGTCCA	24.28	siR352766	GACGCCTTGGTTCTGAAGCACAAC	0.07
siR562978	TGTTGATTCAGCTCTGTTAGACGG	24.14	siR428705	GTCTAACAGAGCTGAATCAACATG	0.07
siR563565	TGTTGTGCTTCAGAACCAAGGCGT	46.81	siR386592	GCCTTGGTTCTGAAGCACAACACG	0.91
siR564089	TGTTTGATCAGTATCGGGTGCATA	27.02	siR531369	TGCACCCGATACTGATCAAACAAG	0.07
siR571631	TTCACGCGGGATGTACGACAGCAC	13.62	siR396280	GCTGTCGTACATCCCGCGTGAAGA	0.07
siR573433	TTCCACAGATCGAACAAAGGGCAT	10.88	siR383407	GCCCTTTGTTCGATCTGTGGAACT	0.07
siR576173	TTCGACTGACCAAGCAAAGCCCTG	13.05	siR411187	GGGCTTTGCTTGGTCAGTCGAAAA	0.35
siR577631	TTCTACAAGGAACATGAAGAGGAT	12.42	siR271762	CCTCTTCATGTTCCTTGTAGAAGA	0.84
siR577959	TTCTAGCCGGATTAGTATAGGTAT	16.35	siR76434	ACCTATACTAATCCGGCTAGAAGC	0.07
siR578711	TTCTCGGAGACTCCCAATCGGCGC	84.43	siR384126	GCCGATTGGGAGTCTCCGAGAAGA	4.49
siR579816	TTCTGTCAGGAGAACCAGCAAAGG	25.05	siR599495	TTTGCTGGTTCTCCTGACAGAAGT	0.77
siR581005	TTGAAAAGAGAGCAGTAGACACAC	12.21	siR437042	GTGTCTACTGCTCTCTTTTCAATA	0.07
siR581908	TTGACCAGAAGTAGAGACGAGACA	26.67	siR508596	TCTCGTCTCTACTTCTGGTCAAGC	0.21
siR582277	TTGACTGGTGATCCGACGGTTCAA	17.62	siR341204	GAACCGTCGGATCACCAGTCAAGC	0.14
siR582417	TTGAGACTTGTAGGGAGGCACTAG	25.12	siR146051	AGTGCCTCCCTACAAGTCTCAACA	0.14
siR583543	TTGATTATGTATAGGATTTGGTAT	10.39	siR66059	ACCAAATCCTATACATAATCAAGC	0.21
siR585781	TTGCTAGTGCAGGGCAGAGTAGGG	10.53	siR310675	CTACTCTGCCCTGCACTAGCAACA	1.75
siR586907	TTGGACTTAACTATGAAGACGTGC	20.07	siR87454	ACGTCTTCATAGTTAAGTCCAAGG	0.14
siR588710	TTGGTATGGCTTAGTGGTAACGGA	10.67	siR305897	CGTTACCACTAAGCCATACCAACC	0.07
siR588905	TTGGTCGATCGATCAACTCGTCTC	11.16	siR351807	GACGAGTTGATCGATCGACCAACA	0.07
siR589916	TTGTAGGGTCTGAATGTAGATAGA	18.67	siR471818	TATCTACATTCAGACCCTACAATC	0.14
siR590535	TTGTCCGATGGTCTGATGGCGGCT	10.25	siR262522	CCGCCATCAGACCATCGGACAAAC	0.35
siR590660	TTGTCGAACAACCACGAGGGCATG	10.04	siR535067	TGCCCTCGTGGTTGTTCGACAAAA	0.21
siR590963	TTGTCTGCCACAGCGTCGTCGTT	10.53	siR279721	CGACGACGCTGTGGCAGACAAGT	0.56
siR592734	TTGTTTGTCCGATGGTCTGATGGC	11.51	siR237089	CATCAGACCATCGGACAAACAATG	0.14
siR593179	TTTAATGCAGATGCTTGGGACGGT	20.7	siR302580	CGTCCCAAGCATCTGCATTAAAAA	0.07
siR593201	TTTAATGTAGAGCAACAGGGTGGT	17.05	siR220463	CACCCTGTTGCTCTACATTAAATC	0.07
siR595936	TTTCCGCATGAGAGTATCGTCGTC	11.93	siR280030	CGACGATACTCTCATGCGGAAATG	0.42
siR596417	TTTCGCACGTGCGGATATGACGGT	11.51	siR302240	CGTCATATCCGCACGTGCGAAAGA	0.14
siR598413	TTTGAGGAAGGCTACTGATGAACC	13.47	siR572659	TTCATCAGTAGCCTTCCTCAAAAT	0.21
siR599846	TTTGGATTAGTATACAAGTGATGG	10.53	siR165182	ATCACTTGTATACTAATCCAAATA	0.14
siR600016	TTTGGGAACAGAACAGGAATCGGT	18.39	siR286714	CGATTCCTGTTCTGTTCCCAAATC	0.07
siR600645	TTTGTCAGTACTGGGAAAATGGCC	17.69	siR255373	CCATTTTCCCAGTACTGACAAAGC	0.07
siR601379	TTTGTTTCAACAGAGCTCATCTAA	14.32	siR113949	AGATGAGCTCTGTTGAAACAAAAT	0.14
siR601753	TTTTACTTAGTAGGCATTAAACAT	16.49	siR443759	GTTTAATGCCTACTAAGTAAAAGA	0.07
siR603385	TTTTGGAGGGACCGACAAAAG	13.76	siR600831	TTTGTCGGTCCCTCCAAAATT	0.42
siR603813	TTTTGTTGGAGAGTTTGTTGTGAT	12	siR216587	CACAACAAACTCTCCAACAAAAAC	0.07
siRNA pairs in S_15DAF
name	siRNA	TPM	name	siRNA*	TPM
siR2587	AAAAGTACTCTCAGATGTCTGCAA	32.04	siR376667	GCAGACATCTGAGAGTACTTTTAA	0.08
siR4245	AAACAACGAGTAGAATGAGAGGTG	11.21	siR271283	CCTCTCATTCTACTCGTTGTTTCT	0.08
siR6909	AAACTCCTCTACATTGATCGTTGC	24.37	siR22759	AACGATCAATGTAGAGGAGTTTGA	1.13
siR7079	AAACTGCAAGAAGAATCGACTGAG	17.75	siR233127	CAGTCGATTCTTCTTGCAGTTTAT	0.08
siR7990	AAAGACGATCCTAGCAGAGCTTCA	26.7	siR33464	AAGCTCTGCTAGGATCGTCTTTTT	0.23
siR8260	AAAGAGTGGTCACCTGGTCGTCAA	10.15	siR350868	GACGACCAGGTGACCACTCTTTTC	0.08
siR11672	AAATAGCGGACTTCTGCAGAAAGG	12.48	siR597251	TTTCTGCAGAAGTCCGCTATTTAT	6.54
siR11849	AAATATATTCATGGTCGTCTGTAT	16.85	siR59879	ACAGACGACCATGAATATATTTTA	0.6
siR12286	AAATCATAGTAGAAGAGAGCTTGC	44.82	siR33453	AAGCTCTCTTCTACTATGATTTAT	0.23
siR14160	AAATTACAAGGTCGACTGCATCCC	13.61	siR369243	GATGCAGTCGACCTTGTAATTTTG	0.15
siR15453	AACAACGAGTAGAATGAGAGGTGG	10.15	siR77189	ACCTCTCATTCTACTCGTTGTTTC	0.08
siR15462	AACAACGCCGAGAACATGACCGCA	12.63	siR299236	CGGTCATGTTCTCGGCGTTGTTGA	0.08
siR15691	AACAAGGCACATATGTAGATGGAG	10.15	siR253979	CCATCTACATATGTGCCTTGTTAT	0.08
siR16934	AACAGATCGGCATACCTCGCAACC	45.72	siR585349	TTGCGAGGTATGCCGATCTGTTGT	0.6
siR17309	AACAGTCGAAGAGGAAACGTGAAG	10.9	siR480528	TCACGTTTCCTCTTCGACTGTTGC	0.08
siR19486	AACCCAAGTGACTACAGAAGATAT	20	siR179043	ATCTTCTGTAGTCACTTGGGTTAA	0.3
siR22314	AACGACGGAAGAGTATGCACACAA	16.09	siR437301	GTGTGCATACTCTTCCGTCGTTGG	0.08
siR22830	AACGATCCTTGCGTAATTCAGCTG	16.32	siR394612	GCTGAATTACGCAAGGATCGTTAT	0.3
siR24617	AACTAAAGCTGTTGGATCCGGTAT	37.15	siR74106	ACCGGATCCAACAGCTTTAGTTGA	0.08
siR24918	AACTACTGAACTGCTGAAGGTGGT	15.34	siR221636	CACCTTCAGCAGTTCAGTAGTTCA	0.3
siR26553	AACTGTCCTCGGAATTGACTGCAA	14.97	siR378158	GCAGTCAATTCCGAGGACAGTTAT	0.38
siR31336	AAGCAACTCGACGATTCTTGATAT	16.54	siR163736	ATCAAGAATCGTCGAGTTGCTTGC	0.15
siR31358	AAGCAAGCATACTCTGAAGATTCA	11.28	siR45858	AATCTTCAGAGTATGCTTGCTTCC	0.3
siR31433	AAGCAATGTTGAAGGATGAATGTA	18.12	siR244330	CATTCATCCTTCAACATTGCTTAG	0.08
siR31804	AAGCATACTCTGAAGATTCATTCT	11.36	siR46326	AATGAATCTTCAGAGTATGCTTGC	1.35
siR33932	AAGCTTTTGCGGAACTTTACCTTC	16.62	siR137227	AGGTAAAGTTCCGCAAAAGCTTGT	0.15
siR34128	AAGGAATACATACTCTGCCGGTAC	19.63	siR74244	ACCGGCAGAGTATGTATTCCTTAT	0.68
siR34621	AAGGATCGAGGCAAGTTGTAAAAA	13.76	siR593263	TTTACAACTTGCCTCGATCCTTAC	0.08
siR34791	AAGGATTGTGTCAGTGGTAGCTAG	44.07	siR124885	AGCTACCACTGACACAATCCTTCG	0.08
siR35345	AAGGCTGTGTTCGTTGGAGAGGGT	11.81	siR271285	CCTCTCCAACGAACACAGCCTTAG	0.08
siR35835	AAGGGTTCATATGTGGTGGCT	29.1	siR249569	CCACCACATATGAACCCTTGT	0.08
siR36103	AAGGTCGACTGCATCCCAAAGTAC	52.64	siR99327	ACTTTGGGATGCAGTCGACCTTGT	0.75
siR38371	AAGTGTAGAGGATAAACATGTATG	11.96	siR455035	TACATGTTTATCCTCTACACTTCC	0.15
siR38761	AAGTTCTCGATCGACTGCAGGCAT	25.34	siR386119	GCCTGCAGTCGATCGAGAACTTAC	0.08
siR39906	AATAATCGGAGCAAATCGTTGG	14.89	siR23144	AACGATTTGCTCCGATTATTGG	0.08
siR40319	AATACCCGACTGCGCTAAGACTGC	20.53	siR144610	AGTCTTAGCGCAGTCGGGTATTGG	4.21
siR41438	AATAGTCTAGAACACTGCAGGTGC	12.33	siR77659	ACCTGCAGTGTTCTAGACTATTAG	0.38
siR42104	AATATGGATTCGTGTTGGGCCTTC	11.43	siR133006	AGGCCCAACACGAATCCATATTGT	0.15
siR42485	AATATTTTTTGCCGGACACATAAG	15.94	siR474047	TATGTGTCCGGCAAAAAATATTGG	0.08
siR42965	AATCACGGCTGTTGATCGTTGATG	15.04	siR477236	TCAACGATCAACAGCCGTGATTAA	0.08
siR43838	AATCCCATAATCGTTGCATCA	10.38	siR182981	ATGCAACGATTATGGGATTGA	1.13
siR47850	AATGGAAAATTCGTTGAAGTCATG	11.36	siR524144	TGACTTCAACGAATTTTCCATTAT	0.08
siR48974	AATGTCTGAAGTCTGAACCAGAGG	14.29	siR512153	TCTGGTTCAGACTTCAGACATTGA	0.08
siR50569	AATTCGGTTTGTCAGACGGATGGA	48.13	siR238503	CATCCGTCTGACAAACCGAATTAG	0.08
siR52437	ACAAAACATTGTGATCCTCCTGAC	35.35	siR231036	CAGGAGGATCACAATGTTTTGTAC	0.15
siR54957	ACAAGGTCGACTGCATCCCAAAGT	17.45	siR600054	TTTGGGATGCAGTCGACCTTGTAA	0.08
siR55408	ACAATATTTCTGACGGCTTCACAA	11.81	siR430912	GTGAAGCCGTCAGAAATATTGTGC	0.3
siR55937	ACAATTGATCTCAGAAGGCAAGTA	47.23	siR334608	CTTGCCTTCTGAGATCAATTGTGT	0.23
siR60404	ACAGCATCGTCACCGCTTACGGCC	27.6	siR266286	CCGTAAGCGGTGACGATGCTGTGT	0.68
siR66688	ACCAAGGAGCTAGAGCGACAGCGG	17.3	siR396266	GCTGTCGCTCTAGCTCCTTGGTTT	0.08
siR67836	ACCACTGCTAGACTACAAGACGAG	23.01	siR304083	CGTCTTGTAGTCTAGCAGTGGTCA	0.75
siR68008	ACCAGAAGTAGAGACGAGACACAC	15.34	siR437072	GTGTCTCGTCTCTACTTCTGGTCA	0.15
siR70099	ACCCACTTGTTTTGAACCGTCGGA	10.9	siR280886	CGACGGTTCAAAACAAGTGGGTAG	0.3
siR72657	ACCGACGGGCTTAAATAGGTGGGG	24.22	siR249941	CCACCTATTTAAGCCCGTCGGTGT	0.08
siR73932	ACCGGAACTAGAACCTGCAGACGG	16.02	siR429663	GTCTGCAGGTTCTAGTTCCGGTTT	0.08
siR80862	ACGACTCCACAGACTACCAAGCAC	12.71	siR397908	GCTTGGTAGTCTGTGGAGTCGTGC	0.08
siR81059	ACGAGAAATCTGAGATGCAAGAAG	18.05	siR515632	TCTTGCATCTCAGATTTCTCGTAT	4.29
siR84442	ACGGACTAGCGGTTTACCCCCATT	30.46	siR549410	TGGGGGTAAACCGCTAGTCCGTGT	0.08
siR85371	ACGGCTGTTGATCGTTGATGGTGT	53.69	siR68888	ACCATCAACGATCAACAGCCGTGA	0.08
siR86039	ACGGTCAGGCGAGGTGGAGACGCG	16.92	siR303697	CGTCTCCACCTCGCCTGACCGTCT	0.23
siR86095	ACGGTCGACGACGGTGGTAGGCAG	10.83	siR385452	GCCTACCACCGTCGTCGACCGTTG	0.08
siR86704	ACGTACTGTCGGCATCTTTTCCAT	16.39	siR398650	GGAAAAGATGCCGACAGTACGTCC	0.15
siR90028	ACTAGACATTTTGGCGCTCGTTGT	10.15	siR22541	AACGAGCGCCAAAATGTCTAGTGC	0.15
siR91657	ACTCAGCGCTCGGTATACTTTACA	14.59	siR447087	TAAAGTATACCGAGCGCTGAGTGG	0.08
siR92793	ACTCGATTTCATGAAGACAAAGCG	14.51	siR337404	CTTTGTCTTCATGAAATCGAGTAC	0.15
siR94118	ACTGACCAAGCAAAGCCCTGTACC	14.51	siR454323	TACAGGGCTTTGCTTGGTCAGTCG	0.08
siR94195	ACTGACGGCAACAAGTAAGCTACT	10.6	siR464909	TAGCTTACTTGTTGCCGTCAGTTG	0.08
siR99316	ACTTTGGATGTACATAGATCG	17.22	siR175697	ATCTATGTACATCCAAAGTTT	0.23
siR99386	ACTTTGTTTGTCGACTTAAGCGGT	19.93	siR292202	CGCTTAAGTCGACAAACAAAGTAA	0.45
siR100360	AGAAACGGATCACTGAGTGGAATC	32.56	siR573583	TTCCACTCAGTGATCCGTTTCTTC	0.08
siR101335	AGAACCCAACGAAATGATCGTCTT	57.15	siR352075	GACGATCATTTCGTTGGGTTCTCA	0.3
siR101435	AGAACCGTCGAACATATGGCGTCA	10.15	siR83133	ACGCCATATGTTCGACGGTTCTAG	0.08
siR101655	AGAACTACACAAGATGAAGAACTA	12.63	siR441091	GTTCTTCATCTTGTGTAGTTCTTC	0.08
siR101884	AGAAGAAAATAGAACAGCAACATC	21.13	siR563208	TGTTGCTGTTCTATTTTCTTCTGT	0.08
siR102048	AGAAGACCCTACTCTGTGTTATCG	20.08	siR150992	ATAACACAGAGTAGGGTCTTCTAA	0.15
siR104428	AGACAAGCGACCGAAGAACGTGTG	36.25	siR223742	CACGTTCTTCGGTCGCTTGTCTGT	0.15
siR106223	AGACGACTAACCATAATACTGCGT	12.48	siR378138	GCAGTATTATGGTTAGTCGTCTAG	0.3
siR106292	AGACGAGATTGTGCATAGCCTACC	71.44	siR465949	TAGGCTATGCACAATCTCGTCTAT	0.08
siR106810	AGACGCGTGGTTTCTGTTCGTGGT	39.78	siR221848	CACGAACAGAAACCACGCGTCTAC	0.08
siR107198	AGACGTGAGTGGGAAGACTAATGG	18.05	siR193577	ATTAGTCTTCCCACTCACGTCTCA	0.08
siR110499	AGAGGATAGATCTGTGAAGGCTAA	24.59	siR122598	AGCCTTCACAGATCTATCCTCTTC	0.3
siR110642	AGAGGCAGAAAGTAGTATGAGTGG	19.4	siR91739	ACTCATACTACTTTCTGCCTCTGC	0.08
siR112554	AGATATCTTTTCTTGCATCGTTGG	17.6	siR22957	AACGATGCAAGAAAAGATATCTAT	0.08
siR113232	AGATCGGACACACTACAAGCAGCA	10.53	siR326094	CTGCTTGTAGTGTGTCCGATCTGC	0.08
siR114767	AGATGTACGAAGTTATAACCCTGA	12.48	siR137070	AGGGTTATAACTTCGTACATCTTG	0.23
siR115084	AGATGTTTGCATATGGTCGTCTGG	68.74	siR106049	AGACGACCATATGCAAACATCTTT	0.75
siR116244	AGCAAAGGCTAAGACTACACCATA	12.03	siR552103	TGGTGTAGTCTTAGCCTTTGCTAT	0.08
siR117310	AGCACCTTCCCCGTCGACCGTCGT	15.27	siR353972	GACGGTCGACGGGGAAGGTGCTAT	0.08
siR118608	AGCAGTTGTAAGCTTCTTCGAACA	10.75	siR575968	TTCGAAGAAGCTTACAACTGCTAA	0.08
siR121700	AGCCGGCCAAGGAAAGAAGTAGAA	18.05	siR310942	CTACTTCTTTCCTTGGCCGGCTCC	0.15
siR123949	AGCGGACTTCTGCAGAAAGGCACC	41.81	siR536336	TGCCTTTCTGCAGAAGTCCGCTAT	3.91
siR125201	AGCTAGTTAGGACGAATGGTGGCG	10.53	siR249696	CCACCATTCGTCCTAACTAGCTGC	0.08
siR127031	AGCTGTTATGCTAGTCGTCTGAAT	27.22	siR481351	TCAGACGACTAGCATAACAGCTTC	0.9
siR127055	AGCTGTTGGATCCGGTATGTATGT	11.36	siR153657	ATACATACCGGATCCAACAGCTTT	0.08
siR127097	AGCTTACAACTGCTAACCGTCGAC	15.72	siR280880	CGACGGTTAGCAGTTGTAAGCTTC	0.08
siR127550	AGCTTGACGATGCTGAAGGATGAT	17.45	siR238832	CATCCTTCAGCATCGTCAAGCTCA	0.08
siR127555	AGCTTGACGGTTTTACTATAGACG	19.33	siR505777	TCTATAGTAAAACCGTCAAGCTGT	0.15
siR127965	AGGAAAAAGGACAACGAGAATGGC	10	siR244682	CATTCTCGTTGTCCTTTTTCCTGC	0.08
siR128089	AGGAAAGATGTAACGAGATAGAGC	16.47	siR505932	TCTATCTCGTTACATCTTTCCTTA	0.08
siR128096	AGGAAAGCTACGAATCGGACGTCA	22.56	siR87140	ACGTCCGATTCGTAGCTTTCCTCA	0.08
siR128363	AGGAACTGCATGCATTGGAACTAA	16.54	siR148297	AGTTCCAATGCATGCAGTTCCTGT	0.08
siR130853	AGGATAACTAGTGCAGGTGAAGAC	10.23	siR330970	CTTCACCTGCACTAGTTATCCTCC	0.08
siR131783	AGGATTCCAACGAACCAGTGGCTA	27.52	siR381539	GCCACTGGTTCGTTGGAATCCTCT	0.08
siR131894	AGGATTGGTCTTGAAGTCGCTTGA	22.26	siR32802	AAGCGACTTCAAGACCAATCCTTA	3.99
siR131916	AGGATTGTGTCAGTGGTAGCTAGG	71.29	siR464532	TAGCTACCACTGACACAATCCTTC	0.08
siR132155	AGGCAAGGAATGCAACTGTGATGC	12.56	siR164400	ATCACAGTTGCATTCCTTGCCTAT	0.45
siR132410	AGGCACTAATCGACTTTACATCCT	11.73	siR370437	GATGTAAAGTCGATTAGTGCCTCT	0.15
siR132439	AGGCACTTAGGAGACGAGAATCTC	11.58	siR371950	GATTCTCGTCTCCTAAGTGCCTAA	0.08
siR135289	AGGGATGAACTCTTAAAGATGGTG	37.15	siR254193	CCATCTTTAAGAGTTCATCCCTGC	0.08
siR135971	AGGGCTGCTTGTTGTAGGTCGGCA	22.64	siR260230	CCGACCTACAACAAGCAGCCCTTG	0.23
siR137408	AGGTACGAACAGATCGCGAGCAGT	14.66	siR539187	TGCTCGCGATCTGTTCGTACCTTA	0.23
siR140709	AGTACGGGTATGAATGAAGTGGCG	11.73	siR250996	CCACTTCATTCATACCCGTACTGT	0.08
siR142544	AGTCACGATTGTCGCTGGTGCATG	25.04	siR531319	TGCACCAGCGACAATCGTGACTGC	0.75
siR142954	AGTCCAAGGCGGTCGAGTAGGTAC	12.48	siR76240	ACCTACTCGACCGCCTTGGACTCC	0.3
siR145360	AGTGACTACAGAAGATATATTCAA	14.66	siR345524	GAATATATCTTCTGTAGTCACTTG	0.08
siR150594	ATAAACTTAGGGCTTGTTCGGTAG	10.45	siR72105	ACCGAACAAGCCCTAAGTTTATGG	0.08
siR156531	ATAGAACTCCACTGGCATGTTTAA	53.39	siR5023	AAACATGCCAGTGGAGTTCTATAT	0.15
siR156619	ATAGACATTTCAGAGAACAACGGA	69.34	siR306658	CGTTGTTCTCTGAAATGTCTATAT	0.08
siR160528	ATATCGATATAGAACTGACGGTGG	26.77	siR75322	ACCGTCAGTTCTATATCGATATAG	0.08
siR161433	ATATGGCGAGAATAGAGAAAATGA	10.53	siR203184	ATTTTCTCTATTCTCGCCATATAT	0.15
siR161491	ATATGGTGACAGGCTGACAGCGAT	25.27	siR292099	CGCTGTCAGCCTGTCACCATATGC	0.15
siR165737	ATCAGGTCTAGCAGAAGAATGTGT	17.75	siR65378	ACATTCTTCTGCTAGACCTGATTC	0.08
siR166782	ATCATGAATGATCTGACCGTTGGA	19.1	siR209578	CAACGGTCAGATCATTCATGATAT	0.23
siR170205	ATCCGCGCGCTGCAGGACGGTTGT	14.29	siR20782	AACCGTCCTGCAGCGCGCGGATCC	0.23
siR172874	ATCGACGGAAGAACATACTCCATT	25.72	siR543943	TGGAGTATGTTCTTCCGTCGATAG	0.15
siR172943	ATCGACTGTAAATATCAATGGTAT	24.82	siR69585	ACCATTGATATTTACAGTCGATCG	0.08
siR173298	ATCGATTGAGAGCTAGTCAGGTGT	19.48	siR77513	ACCTGACTAGCTCTCAATCGATCT	0.08
siR173785	ATCGGACGCTGACATCAGTATGAC	11.13	siR235193	CATACTGATGTCAGCGTCCGATTT	0.08
siR175252	ATCTAGAGCTCGTAGAAGAAAGCA	34.74	siR336911	CTTTCTTCTACGAGCTCTAGATTC	0.15
siR181512	ATGACTGCTTTACGGGACGGAGTG	24.29	siR317571	CTCCGTCCCGTAAAGCAGTCATGT	0.3
siR181890	ATGAGCTGCAAGTTTGAAATGATG	14.89	siR486217	TCATTTCAAACTTGCAGCTCATCC	0.08
siR182702	ATGATTAATATGTGACGATGGATA	13.16	siR488942	TCCATCGTCACATATTAATCATTA	0.08
siR182839	ATGATTTGTATGAGTGAAGATTGA	15.27	siR45855	AATCTTCACTCATACAAATCATTT	0.3
siR185461	ATGCTGCTGAATGAGAAGATGGAT	25.42	siR254163	CCATCTTCTCATTCAGCAGCATGC	0.08
siR188146	ATGGTCTTCATGTTCTTTGGTTAT	11.05	siR18435	AACCAAAGAACATGAAGACCATCC	0.45
siR188562	ATGTAACAAAGATAGCAGGACGTG	19.93	siR302988	CGTCCTGCTATCTTTGTTACATGT	0.15
siR200364	ATTGTTTGTCCGATGGTCTGATGG	16.62	siR165271	ATCAGACCATCGGACAAACAATGT	0.15
siR200445	ATTTAACGACGCGGAATGAACGGA	11.28	siR306098	CGTTCATTCCGCGTCGTTAAATAC	0.38
siR201199	ATTTCATTGGAACTTGGCAGCATA	13.54	siR539943	TGCTGCCAAGTTCCAATGAAATGT	0.08
siR205217	CAAACGCTGGGCTGCGGAGATGGC	22.64	siR240094	CATCTCCGCAGCCCAGCGTTTGGC	0.08
siR206085	CAAAGTACTGTGTGTATGCGTCAT	19.25	siR352643	GACGCATACACACAGTACTTTGAG	7.75
siR211709	CAAGATCAAGAACAAAAACCGCAT	19.93	siR390259	GCGGTTTTTGTTCTTGATCTTGAA	0.15
siR221282	CACCTCATCGTTGTCTTCGTCGTC	12.78	siR279368	CGACGAAGACAACGATGAGGTGAT	4.59
siR222253	CACGAGATTGTAGTAAATAGATGG	10.98	siR175758	ATCTATTTACTACAATCTCGTGCA	0.15
siR224460	CACTCGTCCAAGTAGAAGCAAGGT	27.6	siR334837	CTTGCTTCTACTTGGACGAGTGCA	0.08
siR224841	CACTGCTAGACTACAAGACGAGAT	15.12	siR319741	CTCGTCTTGTAGTCTAGCAGTGGT	14.06
siR224935	CACTGGTGAGAACGAAGTAGCAGA	17.07	siR538398	TGCTACTTCGTTCTCACCAGTGAT	0.08
siR226041	CAGAAGAAAATAGAACAGCAACAT	10.75	siR442412	GTTGCTGTTCTATTTTCTTCTGTG	0.08
siR226393	CAGAATTGAGAACAAAAACTGCAT	10	siR378585	GCAGTTTTTGTTCTCAATTCTGAA	0.15
siR227789	CAGATCCTTTTGGTGTAGCTCGGT	56.33	siR283419	CGAGCTACACCAAAAGGATCTGAA	0.83
siR228183	CAGATTCGTAGAAAACCATGGCAA	31.21	siR382413	GCCATGGTTTTCTACGAATCTGAG	0.08
siR229010	CAGCCACCAGTAGTAATCGTCGTC	12.03	siR280252	CGACGATTACTACTGGTGGCTGCT	0.83
siR231737	CAGGGACTGTTGTGATGGTTG	10.75	siR68907	ACCATCACAACAGTCCCTGCA	0.08
siR231962	CAGGGTAACTGTCAATGCGCGCAT	19.7	siR388418	GCGCGCATTGACAGTTACCCTGAT	0.08
siR232327	CAGGTGGGAATAGATGATAAGAAA	11.21	siR513717	TCTTATCATCTATTCCCACCTGAC	0.08
siR233435	CAGTGATCTGGTGTAGTTGTCGAT	21.13	siR277925	CGACAACTACACCAGATCACTGCT	0.83
siR235389	CATAGAGGTTTGTAGTTAAATGGC	12.93	siR245442	CATTTAACTACAAACCTCTATGGT	0.08
siR235408	CATAGATCGTTGAGGCCACCA	12.48	siR434784	GTGGCCTCAACGATCTATGTA	0.98
siR239356	CATCGGTAACATGTGGGTCAGGAT	12.18	siR272180	CCTGACCCACATGTTACCGATGAC	0.45
siR241387	CATGACGGTAAGTGGGGATGTGTA	15.72	siR218617	CACATCCCCACTTACCGTCATGGT	0.15
siR244566	CATTCTAAACTTGTCAACTCGGAT	10.68	siR261442	CCGAGTTGACAAGTTTAGAATGAC	0.38
siR244908	CATTGATCAAGTGTAGTCGTGCAT	15.94	siR375760	GCACGACTACACTTGATCAATGAC	0.08
siR250793	CCACTGACTGCAGAAGAGAGAGGT	29.18	siR320916	CTCTCTCTTCTGCAGTCAGTGGTA	0.08
siR261392	CCGAGTCGTAGTGAAGTGGAGGGC	10.3	siR270114	CCTCCACTTCACTACGACTCGGAC	0.83
siR264195	CCGGATTAGCAGACGAAACGCCAT	15.57	siR408004	GGCGTTTCGTCTGCTAATCCGGTG	0.08
siR267479	CCGTGGCCTGAAGGAAAATAGCAT	18.35	siR392859	GCTATTTTCCTTCAGGCCACGGCT	0.08
siR271644	CCTCTGTATATTGCTGGCTGC	12.33	siR120074	AGCCAGCAATATACAGAGGCA	0.15
siR278075	CGACAATCGCAGTTGGGCTCGCAT	15.12	siR387501	GCGAGCCCAACTGCGATTGTCGCC	1.58
siR279671	CGACGACGAGCAACCCAAAACCAC	13.61	siR418476	GGTTTTGGGTTGCTCGTCGTCGCA	0.08
siR279920	CGACGAGATTGGTAAAAAGACAGC	11.05	siR558189	TGTCTTTTTACCAATCTCGTCGAT	0.08
siR281721	CGACTGACCAAGCAAAGCCCTGTA	15.19	siR231895	CAGGGCTTTGCTTGGTCAGTCGAA	0.15
siR281989	CGACTGTTTATCCATACCTATCAG	11.43	siR365252	GATAGGTATGGATAAACAGTCGAT	0.08
siR282669	CGAGACTGAGACCAAGACATTCGG	31.51	siR346598	GAATGTCTTGGTCTCAGTCTCGGT	0.23
siR283950	CGAGGCCAACCTGAGCATCGTCGT	25.72	siR352355	GACGATGCTCAGGTTGGCCTCGGG	0.08
siR285907	CGATGACACAGTGAAGACTCGCAT	13.31	siR387648	GCGAGTCTTCACTGTGTCATCGGA	0.83
siR286901	CGATTGGGAGTCTCCGAGAAGATG	55.2	siR514987	TCTTCTCGGAGACTCCCAATCGGC	7.14
siR290206	CGCGAGCAGTGAACAACAGGGCAA	27.37	siR383325	GCCCTGTTGTTCACTGCTCGCGAT	0.08
siR293709	CGGACTTCTGCAGAAAGGCACCAA	16.02	siR416002	GGTGCCTTTCTGCAGAAGTCCGCT	1.35
siR295021	CGGATTTTTGTCTCGTATCGTCAC	19.1	siR351850	GACGATACGAGACAAAAATCCGCT	0.08
siR296308	CGGCGATGGCTAAGGAAGACTGGT	22.49	siR233285	CAGTCTTCCTTAGCCATCGCCGTT	0.6
siR297119	CGGCTGTATTGAACAAAAGTGGCA	19.4	siR251104	CCACTTTTGTTCAATACAGCCGGC	0.08
siR297188	CGGCTTCAATGTCGGACTGTTCAG	22.56	siR340773	GAACAGTCCGACATTGAAGCCGAG	0.3
siR310536	CTACTCATCGTGAGGCAGAGACAT	22.94	siR429479	GTCTCTGCCTCACGATGAGTAGAT	0.08
siR311476	CTAGAGCTCGTAGAAGAAAGCAAT	49.63	siR541316	TGCTTTCTTCTACGAGCTCTAGAT	0.08
siR314252	CTATTAGTGACAAGTGTAGGCCGA	17.82	siR406373	GGCCTACACTTGTCACTAATAGAA	0.23
siR317290	CTCCGACTCCGACAGAAAGAACGG	11.36	siR441193	GTTCTTTCTGTCGGAGTCGGAGAG	0.08
siR318636	CTCGACGAGATTGGAGGTGGCTAT	42.94	siR119954	AGCCACCTCCAATCTCGTCGAGTT	0.75
siR319593	CTCGTCCAAGTAGAAGCAAGGTAT	41.36	siR78617	ACCTTGCTTCTACTTGGACGAGTG	0.08
siR320767	CTCTCGTGAGTGTAGCCAAGCAGC	24.89	siR541063	TGCTTGGCTACACTCACGAGAGAC	0.08
siR321242	CTCTGATTGTGAAAGTGTGATGGA	13.69	siR236827	CATCACACTTTCACAATCAGAGAA	0.08
siR322739	CTGAATGTAGATAGATCAAGGCTC	86.11	siR386543	GCCTTGATCTATCTACATTCAGAC	0.08
siR324220	CTGATTGTGAAAGTGTGATGGAAA	18.65	siR488767	TCCATCACACTTTCACAATCAGAG	0.15
siR324730	CTGCATAGACGGTAGAGTAGGTAT	18.05	siR76245	ACCTACTCTACCGTCTATGCAGCA	0.3
siR328058	CTGTCAAAGTAGAATGGAGGAGGT	11.05	siR317899	CTCCTCCATTCTACTTTGACAGAT	0.08
siR328865	CTGTGGTGACCAAGGAGAGCGCAT	29.25	siR388689	GCGCTCTCCTTGGTCACCACAGCA	0.08
siR333115	CTTCTCGGAGACTCCCAATCGGCG	32.71	siR262046	CCGATTGGGAGTCTCCGAGAAGAT	0.3
siR333983	CTTGACCAGAAGTAGAGACGAGAC	12.78	siR319710	CTCGTCTCTACTTCTGGTCAAGCC	0.15
siR334620	CTTGCGAAGGATTGTGTCAGTGGT	10.53	siR224648	CACTGACACAATCCTTCGCAAGTT	0.23
siR341825	GAACTACTGAACTGCTGAAGGTGG	10.6	siR78323	ACCTTCAGCAGTTCAGTAGTTCAG	0.23
siR342790	GAAGACGACGAAGACAACGATGAG	13.01	siR239603	CATCGTTGTCTTCGTCGTCTTCAA	0.75
siR344361	GAAGGCTGCCTGAGCGGACGCGCT	26.55	siR290995	CGCGTCCGCTCAGGCAGCCTTCCG	0.08
siR344938	GAAGTCTTTATGTAGGGCAGGTAT	15.34	siR77687	ACCTGCCCTACATAAAGACTTCAC	0.08
siR345913	GAATCGGACGTCAATATCGGCATA	15.04	siR535325	TGCCGATATTGACGTCCGATTCGT	0.08
siR354530	GACGTGAGTGGGAAGACTAATGGG	12.71	siR244048	CATTAGTCTTCCCACTCACGTCTC	0.08
siR356536	GAGAAATGTCGGGCTGCAGCGGCT	16.24	siR263375	CCGCTGCAGCCCGACATTTCTCGC	0.53
siR360683	GAGGACGAGAAATGTTGGCAA	31.36	siR380858	GCCAACATTTCTCGTCCTCTC	0.3
siR362059	GAGGGCTTGACCAGAAGTAGAGAC	24.29	siR320174	CTCTACTTCTGGTCAAGCCCTCGG	0.23
siR363997	GAGTTCATGCATCGTTGGAGCCGG	13.16	siR408293	GGCTCCAACGATGCATGAACTCGC	0.08
siR364153	GAGTTGTAGATGAAGGCAGTGGAG	33.69	siR250856	CCACTGCCTTCATCTACAACTCGG	0.3
siR365614	GATATGAACGATGTCGGATCCACC	27.22	siR544560	TGGATCCGACATCGTTCATATCAT	0.23
siR368190	GATGAACTAGTAGAAGGACAGAAT	13.39	siR512601	TCTGTCCTTCTACTAGTTCATCCT	0.23
siR369613	GATGCTTGGTTGGATGTGTGCATA	12.71	siR531148	TGCACACATCCAACCAAGCATCAT	0.23
siR371249	GATGTTTGCATATGGTCGTCTGGT	11.21	siR226755	CAGACGACCATATGCAAACATCTT	3.68
siR374650	GCAATAGATCAGAACATGCCGGTG	10.53	siR264457	CCGGCATGTTCTGATCTATTGCAG	3.76
siR376553	GCAGAACTTCTGGATGGTAGAGAA	13.69	siR320090	CTCTACCATCCAGAAGTTCTGCAA	0.23
siR395500	GCTGCTCTGAACTGAAAAGATGGT	17.52	siR241100	CATCTTTTCAGTTCAGAGCAGCAG	0.08
siR402240	GGAGGAGTTCTGCTAGGAAGGCTG	29.1	siR386449	GCCTTCCTAGCAGAACTCCTCCAT	0.15
siR425424	GTCATCTCATCGGCGATCTGCGTT	12.93	siR287754	CGCAGATCGCCGATGAGATGACCA	0.08
siR429925	GTCTGTTGTGTGGGGATGGTAGGA	13.39	siR309474	CTACCATCCCCACACAACAGACAC	0.08
siR434301	GTGGATAACTAACTGGATGGCATT	12.26	siR534490	TGCCATCCAGTTAGTTATCCACAA	0.15
siR436274	GTGTACGATTGAAGTGAATGCGCA	11.13	siR288219	CGCATTCACTTCAATCGTACACAC	0.15
siR438243	GTGTTGGTAATGTAGATTAGATGG	14.97	siR174826	ATCTAATCTACATTACCAACACCA	0.08
siR442770	GTTGGTATGGCTTAGTGGTAACGG	26.85	siR438795	GTTACCACTAAGCCATACCAACCC	0.23
siR443340	GTTGTGCTTCAGAACCAAGGCGTC	18.95	siR289956	CGCCTTGGTTCTGAAGCACAACAC	0.53
siR443784	GTTTACAGGACTGAGTTAAATGGT	14.36	siR245443	CATTTAACTCAGTCCTGTAAACAT	0.3
siR446272	TAAAATATATTCATGGTCGTCTGT	10.98	siR106054	AGACGACCATGAATATATTTTAGT	0.3
siR450289	TAAGGACGACAAGTTAGTGACAAT	11.13	siR555638	TGTCACTAACTTGTCGTCCTTAAT	0.15
siR452556	TAATTGGTTCTGAATGAAAGATGG	21.88	siR179713	ATCTTTCATTCAGAACCAATTATA	0.08
siR453353	TACAATGACGGCGACCTCTTCCAC	10.23	siR399289	GGAAGAGGTCGCCGTCATTGTACT	0.15
siR456869	TACCTACAGGACACAAGATTGGCT	11.96	siR248676	CCAATCTTGTGTCCTGTAGGTATT	0.53
siR461876	TAGACATGGATATTGCTGAAG	20.68	siR481807	TCAGCAATATCCATGTCTAGT	0.08
siR464379	TAGCGGACTTCTGCAGAAAGGCAC	29.63	siR386657	GCCTTTCTGCAGAAGTCCGCTATT	0.15
siR477102	TCAACCATAGTAGGAACTAGA	26.1	siR468457	TAGTTCCTACTATGGTTGAAC	0.15
siR478529	TCAATCTCCTTTTGTCGGTCC	35.8	siR72312	ACCGACAAAAGGAGATTGAGA	0.23
siR480153	TCACGAAAAAACGGAGTAGGAGGA	12.03	siR317755	CTCCTACTCCGTTTTTTCGTGATC	0.08
siR480434	TCACGGTGATTATGGAGGATA	10.83	siR494709	TCCTCCATAATCACCGTGAGA	0.08
siR483523	TCATACTACCTGCAAGAGCTGCAT	17.37	siR377523	GCAGCTCTTGCAGGTAGTATGATT	0.08
siR486115	TCATTGGTTGTTCGTGAGCGTCGT	17.3	siR352860	GACGCTCACGAACAACCAATGACG	1.88
siR491244	TCCGAAGAGCTAGAAGTTTGTCAT	21.73	siR347208	GACAAACTTCTAGCTCTTCGGATC	0.6
siR491249	TCCGAAGAGCTGGAAGTTTGTCAT	15.79	siR347205	GACAAACTTCCAGCTCTTCGGATC	0.38
siR493088	TCCGGTTTTCAGTTGATTTGGCAC	24.67	siR380793	GCCAAATCAACTGAAAACCGGAAA	0.08
siR495259	TCCTCTCCTAAGTCGTTGGGC	10.3	siR247289	CCAACGACTTAGGAGAGGATT	0.53
siR503595	TCTAAACTCCTACGGCTCAAGAAT	12.93	siR515436	TCTTGAGCCGTAGGAGTTTAGATT	1.13
siR505080	TCTAGAGCTCGTAGAAGAAAGCAA	39.93	siR398316	GCTTTCTTCTACGAGCTCTAGATT	0.23
siR506428	TCTCAATCTCCTTTTGTCGGT	16.09	siR277731	CGACAAAAGGAGATTGAGATG	0.08
siR510057	TCTGAATTCGTAGCACAACTGCAT	22.41	siR378547	GCAGTTGTGCTACGAATTCAGATT	0.08
siR510469	TCTGAGGTCACAAGTTTTGAATGC	34.52	siR194284	ATTCAAAACTTGTGACCTCAGATG	0.38
siR511645	TCTGGACATTTATCAGCTGGGCAC	13.01	siR382734	GCCCAGCTGATAAATGTCCAGACC	0.08
siR511710	TCTGGAGCTCGTAGATGAAGGAGT	20.61	siR496285	TCCTTCATCTACGAGCTCCAGACT	0.08
siR512472	TCTGTCAGGAGAACCAGCAAAGGA	63.4	siR337203	CTTTGCTGGTTCTCCTGACAGAAG	0.15
siR512475	TCTGTCAGGATAAGCTATGTGGGC	10.9	siR249377	CCACATAGCTTATCCTGACAGAAG	0.08
siR515885	TCTTGGATTGAATACGGTTGA	30.01	siR20746	AACCGTATTCAATCCAAGACA	0.15
siR518466	TGAACGATGAGGAGAACTTAGGAT	19.7	siR268421	CCTAAGTTCTCCTCATCGTTCATC	0.08
siR518557	TGAACGTGAGACGAACTAATGTAT	11.28	siR65123	ACATTAGTTCGTCTCACGTTCAAT	0.23
siR519367	TGAAGCTTGCAGTTCTGATTCATT	10.68	siR520003	TGAATCAGAACTGCAAGCTTCATT	7.97
siR520119	TGAATCCTGCAAGACTGCAACACC	13.24	siR563053	TGTTGCAGTCTTGCAGGATTCATC	0.08
siR520382	TGAATGTAGATAGATCAAGGCTCT	10.45	siR122686	AGCCTTGATCTATCTACATTCAGA	0.3
siR520636	TGAATTTCTTGACAGTTGACACAT	21.58	siR436681	GTGTCAACTGTCAAGAAATTCACT	0.08
siR520699	TGACAAACTTCTAGCTCTTCGGAT	16.62	siR259639	CCGAAGAGCTAGAAGTTTGTCATC	0.3
siR520862	TGACAAGTTTAGAATGACAGAAGT	23.01	siR579824	TTCTGTCATTCTAAACTTGTCAAC	0.08
siR521872	TGACCAGAAGTAGAGACGAGACAC	131	siR429369	GTCTCGTCTCTACTTCTGGTCAAG	0.08
siR524086	TGACTGTTTACGGATCAATTGCAA	26.32	siR374920	GCAATTGATCCGTAAACAGTCAGT	0.08
siR524278	TGACTTTCGGGTTGTCGGTGACGG	21.58	siR424493	GTCACCGACAACCCGAAAGTCATC	0.08
siR526574	TGAGTACTGTATAAGCCAAAGTGG	10.08	siR99323	ACTTTGGCTTATACAGTACTCATA	0.38
siR527453	TGATAGGTAGAAAGATGAAGACAA	17.75	siR430141	GTCTTCATCTTTCTACCTATCAAA	0.15
siR528650	TGATGCAACGGTTATGGGATT	20.15	siR489760	TCCCATAACCGTTGCATCATA	0.23
siR530121	TGATTTGTATGAGTGAAGATTGAC	16.62	siR215186	CAATCTTCACTCATACAAATCATT	0.08
siR531800	TGCAGAACTTCTGGATGGTAGAGA	10.9	siR504383	TCTACCATCCAGAAGTTCTGCAAC	0.23
siR532407	TGCAGGGACTGTTGTGATGGT	132.43	siR236793	CATCACAACAGTCCCTGCATT	0.08
siR537363	TGCGGCAGTGGATTGGTCACGCAT	10.15	siR390685	GCGTGACCAATCCACTGCCGCATA	0.15
siR538320	TGCTACCTAGGATGAGACACGGCG	12.56	siR267608	CCGTGTCTCATCCTAGGTAGCAAA	0.08
siR540918	TGCTTGACTGGTGATCCGACGGTT	10.83	siR267023	CCGTCGGATCACCAGTCAAGCAGC	1.8
siR541722	TGGAACCCTGTTGACAAGCTGACC	12.78	siR482270	TCAGCTTGTCAACAGGGTTCCAGT	0.08
siR542022	TGGAAGGCAAGATCTGACGGACAG	16.7	siR426926	GTCCGTCAGATCTTGCCTTCCATG	0.08
siR542036	TGGAAGGTATGTGAAGAAAGGATA	10.68	siR496737	TCCTTTCTTCACATACCTTCCAAC	0.08
siR542164	TGGAATCACCTAACCTGTAGAAGA	11.96	siR577667	TTCTACAGGTTAGGTGATTCCAAG	0.15
siR542383	TGGACAAGATCAGTTATGCGCGCA	11.58	siR290401	CGCGCATAACTGATCTTGTCCACA	0.6
siR542476	TGGACACTTCTGTCAGGAGAACCA	20.61	siR440866	GTTCTCCTGACAGAAGTGTCCATT	0.08
siR543146	TGGACTCTTCACAGGTATACTGAC	13.99	siR232748	CAGTATACCTGTGAAGAGTCCATG	0.3
siR545166	TGGATTGAATACGGTTGATGTCAG	13.54	siR348728	GACATCAACCGTATTCAATCCAAG	0.08
siR545718	TGGCAGAGCGACGAGACTAAGAAG	10.6	siR513642	TCTTAGTCTCGTCGCTCTGCCATC	0.08
siR547385	TGGCTCCGTGCTTGATTGTTGGTC	12.11	siR246906	CCAACAATCAAGCACGGAGCCATG	0.15
siR550245	TGGTAATGTAGATTAGATGGGCCT	13.61	siR382786	GCCCATCTAATCTACATTACCAAC	0.08
siR550734	TGGTCAACATAAGTAGATAAGCAT	55.35	siR396947	GCTTATCTACTTATGTTGACCATG	0.08
siR551695	TGGTGATGTTCTTCCGGCGGG	2631.05	siR289326	CGCCGGAAGAACATCACCAGG	0.08
siR551828	TGGTGCTAGTTGGATCGTACAGAC	14.44	siR327801	CTGTACGATCCAACTAGCACCACA	0.38
siR551998	TGGTGGGGAATGTGAGATGTA	11.66	siR239948	CATCTCACATTCCCCACCAAC	0.08
siR552836	TGGTTGTAGTAGCCCCGCGGT	16.09	siR290802	CGCGGGGCTACTACAACCAAT	0.15
siR554375	TGTAGCTGAAGTGAATGTAGGCAT	23.84	siR385449	GCCTACATTCACTTCAGCTACATC	0.08
siR558651	TGTGAGAAGACGATGGTGGAAGAA	10.45	siR331553	CTTCCACCATCGTCTTCTCACACA	0.08
siR563565	TGTTGTGCTTCAGAACCAAGGCGT	50.91	siR386592	GCCTTGGTTCTGAAGCACAACACG	1.5
siR568741	TTAGTCGTCTAGAAAAAGTGGTAT	22.26	siR67958	ACCACTTTTTCTAGACGACTAACC	0.08
siR576172	TTCGACTCTTGAACCCAAAGGAAG	22.41	siR496785	TCCTTTGGGTTCAAGAGTCGAATG	0.08
siR576729	TTCGGAGCAACAAAGGGAAGG	18.73	siR574495	TTCCCTTTGTTGCTCCGAATA	0.15
siR577631	TTCTACAAGGAACATGAAGAGGAT	10.3	siR271762	CCTCTTCATGTTCCTTGTAGAAGA	0.6
siR578711	TTCTCGGAGACTCCCAATCGGCGC	64.9	siR384126	GCCGATTGGGAGTCTCCGAGAAGA	3.84
siR579816	TTCTGTCAGGAGAACCAGCAAAGG	22.49	siR599495	TTTGCTGGTTCTCCTGACAGAAGT	0.68
siR581908	TTGACCAGAAGTAGAGACGAGACA	18.65	siR508596	TCTCGTCTCTACTTCTGGTCAAGC	0.08
siR582144	TTGACGGGTACATATAAGACTGAA	18.65	siR233273	CAGTCTTATATGTACCCGTCAAAC	0.08
siR586594	TTGGAACGTGACGATACGAGACAA	12.78	siR429357	GTCTCGTATCGTCACGTTCCAAAT	0.08
siR587879	TTGGCGGCCTCGGCGTTCTCC	10.6	siR101572	AGAACGCCGAGGCCGCCAATA	0.08
siR589715	TTGTAGAACAAACAACAGTGTGGT	20.61	siR217790	CACACTGTTGTTTGTTCTACAACT	0.08
siR597799	TTTGAACTGTTGTCTGCATAAACC	46.1	siR594489	TTTATGCAGACAACAGTTCAAAGA	0.08
siR598413	TTTGAGGAAGGCTACTGATGAACC	10.08	siR572659	TTCATCAGTAGCCTTCCTCAAAAT	0.08
siR601379	TTTGTTTCAACAGAGCTCATCTAA	16.77	siR113949	AGATGAGCTCTGTTGAAACAAAAT	0.08
siR601753	TTTTACTTAGTAGGCATTAAACAT	21.43	siR443759	GTTTAATGCCTACTAAGTAAAAGA	0.08
siR603385	TTTTGGAGGGACCGACAAAAG	22.34	siR600831	TTTGTCGGTCCCTCCAAAATT	1.88
siRNA pairs in S_21DAF
name	siRNA	TPM	name	siRNA*	TPM
siR9247	AAAGCTGTTGGATCCGGTATGTAT	12.5674	siR62078	ACATACCGGATCCAACAGCTTTAG	0.351534
siR16934	AACAGATCGGCATACCTCGCAACC	13.0947	siR585349	TTGCGAGGTATGCCGATCTGTTGT	0.175767
siR35835	AAGGGTTCATATGTGGTGGCT	33.6594	siR249569	CCACCACATATGAACCCTTGT	0.351534
siR36103	AAGGTCGACTGCATCCCAAAGTAC	17.9283	siR99327	ACTTTGGGATGCAGTCGACCTTGT	0.0878836
siR43838	AATCCCATAATCGTTGCATCA	12.9189	siR182981	ATGCAACGATTATGGGATTGA	1.40614
siR55104	ACAAGTGATGTTGATGCTGCT	15.3796	siR228857	CAGCATCAACATCACTTGTAA	0.0878836
siR72657	ACCGACGGGCTTAAATAGGTGGGG	13.7098	siR249941	CCACCTATTTAAGCCCGTCGGTGT	0.175767
siR92700	ACTCGACGAGATTGGAGGTGGCTA	12.1279	siR381363	GCCACCTCCAATCTCGTCGAGTTT	0.175767
siR100360	AGAAACGGATCACTGAGTGGAATC	15.0281	siR573583	TTCCACTCAGTGATCCGTTTCTTC	0.175767
siR101845	AGAACTTCTGGATGGTAGAGAACA	16.6979	siR578801	TTCTCTACCATCCAGAAGTTCTGC	0.0878836
siR123949	AGCGGACTTCTGCAGAAAGGCACC	27.2439	siR536336	TGCCTTTCTGCAGAAGTCCGCTAT	2.72439
siR126319	AGCTGATGTTGGTAGGGCGGG	14.5887	siR288939	CGCCCTACCAACATCAGCTGC	0.263651
siR129681	AGGACTATGGCTTTCCGGTCGGGG	13.3583	siR260217	CCGACCGGAAAGCCATAGTCCTAA	0.0878836
siR142544	AGTCACGATTGTCGCTGGTGCATG	11.6006	siR531319	TGCACCAGCGACAATCGTGACTGC	0.0878836
siR157498	ATAGCGTCAGCATGTGGATGG	18.4556	siR167929	ATCCACATGCTGACGCTATTG	0.0878836
siR166885	ATCATGCCTTGTAAAGATCGTCAT	29.0016	siR352205	GACGATCTTTACAAGGCATGATGG	0.175767
siR181512	ATGACTGCTTTACGGGACGGAGTG	10.4582	siR317571	CTCCGTCCCGTAAAGCAGTCATGT	0.175767
siR183479	ATGCAGGGACTGTTGTGATGG	19.2465	siR164239	ATCACAACAGTCCCTGCATTC	0.0878836
siR186391	ATGGATATTGCTGAAGCCGTA	11.0733	siR297204	CGGCTTCAGCAATATCCATGT	0.0878836
siR188682	ATGTACATAGATCGTTGAGGC	23.4649	siR314768	CTCAACGATCTATGTACATCC	0.175767
siR206011	CAAAGGGAAGCAATGAAGCAA	174.976	siR397134	GCTTCATTGCTTCCCTTTGTT	0.0878836
siR221282	CACCTCATCGTTGTCTTCGTCGTC	10.8097	siR279368	CGACGAAGACAACGATGAGGTGAT	2.98804
siR222569	CACGCATTGGAGAGACATAAACAA	10.1945	siR444050	GTTTATGTCTCTCCAATGCGTGTG	0.0878836
siR224460	CACTCGTCCAAGTAGAAGCAAGGT	17.0494	siR334837	CTTGCTTCTACTTGGACGAGTGCA	0.527302
siR227789	CAGATCCTTTTGGTGTAGCTCGGT	31.8139	siR283419	CGAGCTACACCAAAAGGATCTGAA	0.0878836
siR229010	CAGCCACCAGTAGTAATCGTCGTC	11.7764	siR280252	CGACGATTACTACTGGTGGCTGCT	0.175767
siR231782	CAGGGATCTCTTGGATGGAAGCAG	10.3703	siR397148	GCTTCCATCCAAGAGATCCCTGAT	0.175767
siR235408	CATAGATCGTTGAGGCCACCA	21.9709	siR434784	GTGGCCTCAACGATCTATGTA	1.23037
siR239356	CATCGGTAACATGTGGGTCAGGAT	14.0614	siR272180	CCTGACCCACATGTTACCGATGAC	0.0878836
siR244908	CATTGATCAAGTGTAGTCGTGCAT	15.4675	siR375760	GCACGACTACACTTGATCAATGAC	0.0878836
siR249543	CCACCAAGCGTTGTAGGTTAG	11.0733	siR20950	AACCTACAACGCTTGGTGGAA	0.439418
siR250793	CCACTGACTGCAGAAGAGAGAGGT	17.2252	siR320916	CTCTCTCTTCTGCAGTCAGTGGTA	0.0878836
siR271644	CCTCTGTATATTGCTGGCTGC	17.2252	siR120074	AGCCAGCAATATACAGAGGCA	0.0878836
siR277809	CGACAAATTAGACTCGGAATCGGA	10.2824	siR286692	CGATTCCGAGTCTAATTTGTCGGT	0.0878836
siR278075	CGACAATCGCAGTTGGGCTCGCAT	12.7431	siR387501	GCGAGCCCAACTGCGATTGTCGCC	1.0546
siR282669	CGAGACTGAGACCAAGACATTCGG	31.5502	siR346598	GAATGTCTTGGTCTCAGTCTCGGT	0.351534
siR286901	CGATTGGGAGTCTCCGAGAAGATG	41.7447	siR514987	TCTTCTCGGAGACTCCCAATCGGC	5.80032
siR293709	CGGACTTCTGCAGAAAGGCACCAA	14.7644	siR416002	GGTGCCTTTCTGCAGAAGTCCGCT	0.96672
siR296308	CGGCGATGGCTAAGGAAGACTGGT	18.2798	siR233285	CAGTCTTCCTTAGCCATCGCCGTT	0.175767
siR314998	CTCAATCTCCTTTTGTCGGTC	13.2704	siR259899	CCGACAAAAGGAGATTGAGAT	0.527302
siR318636	CTCGACGAGATTGGAGGTGGCTAT	14.325	siR119954	AGCCACCTCCAATCTCGTCGAGTT	0.175767
siR333115	CTTCTCGGAGACTCCCAATCGGCG	23.2013	siR262046	CCGATTGGGAGTCTCCGAGAAGAT	0.0878836
siR344240	GAAGGCAAGATCTGACGGACAGAA	11.7764	siR328290	CTGTCCGTCAGATCTTGCCTTCCA	0.0878836
siR360683	GAGGACGAGAAATGTTGGCAA	41.1295	siR380858	GCCAACATTTCTCGTCCTCTC	0.175767
siR362059	GAGGGCTTGACCAGAAGTAGAGAC	16.2585	siR320174	CTCTACTTCTGGTCAAGCCCTCGG	0.351534
siR368796	GATGAGTGGTCGATCTGTTTGGAT	10.9855	siR246382	CCAAACAGATCGACCACTCATCAT	0.0878836
siR387923	GCGATTGACTGGTTGAATGGCATG	11.6006	siR534626	TGCCATTCAACCAGTCAATCGCGA	0.0878836
siR402240	GGAGGAGTTCTGCTAGGAAGGCTG	26.0136	siR386449	GCCTTCCTAGCAGAACTCCTCCAT	0.0878836
siR416645	GGTGGTGTTGCTGAAGTATGACGG	26.2772	siR425128	GTCATACTTCAGCAACACCACCGT	0.0878836
siR429925	GTCTGTTGTGTGGGGATGGTAGGA	13.0068	siR309474	CTACCATCCCCACACAACAGACAC	0.175767
siR442770	GTTGGTATGGCTTAGTGGTAACGG	14.4129	siR438795	GTTACCACTAAGCCATACCAACCC	0.175767
siR464379	TAGCGGACTTCTGCAGAAAGGCAC	30.4077	siR386657	GCCTTTCTGCAGAAGTCCGCTATT	0.175767
siR472404	TATCTTTTCTTGCATCGTTGGTAC	20.8284	siR66405	ACCAACGATGCAAGAAAAGATATC	0.0878836
siR477102	TCAACCATAGTAGGAACTAGA	20.8284	siR468457	TAGTTCCTACTATGGTTGAAC	0.175767
siR480434	TCACGGTGATTATGGAGGATA	16.7858	siR494709	TCCTCCATAATCACCGTGAGA	0.0878836
siR491249	TCCGAAGAGCTGGAAGTTTGTCAT	11.2491	siR347205	GACAAACTTCCAGCTCTTCGGATC	0.0878836
siR495259	TCCTCTCCTAAGTCGTTGGGC	17.8404	siR247289	CCAACGACTTAGGAGAGGATT	0.351534
siR500423	TCGGAATTGACAGAAAAGAGTGGT	19.4223	siR224600	CACTCTTTTCTGTCAATTCCGATT	0.0878836
siR506428	TCTCAATCTCCTTTTGTCGGT	18.3677	siR277731	CGACAAAAGGAGATTGAGATG	0.351534
siR510769	TCTGATTGTGAAAGTGTGATGGAA	13.5341	siR253314	CCATCACACTTTCACAATCAGAGA	0.0878836
siR511710	TCTGGAGCTCGTAGATGAAGGAGT	13.3583	siR496285	TCCTTCATCTACGAGCTCCAGACT	0.0878836
siR517905	TGAAATGCAGCTGCGACTTTGGTT	26.0136	siR246651	CCAAAGTCGCAGCTGCATTTCATG	0.263651
siR519401	TGAAGGAGTCAATACTGGTAG	12.2158	siR68509	ACCAGTATTGACTCCTTCAAA	0.0878836
siR519483	TGAAGGGGAATGGCACTGCTCGTC	15.0281	siR283219	CGAGCAGTGCCATTCCCCTTCAGG	0.0878836
siR520699	TGACAAACTTCTAGCTCTTCGGAT	12.3037	siR259639	CCGAAGAGCTAGAAGTTTGTCATC	0.175767
siR524278	TGACTTTCGGGTTGTCGGTGACGG	17.9283	siR424493	GTCACCGACAACCCGAAAGTCATC	0.0878836
siR528647	TGATGCAACGATTATGGGATT	12.2158	siR489766	TCCCATAATCGTTGCATCATA	1.93344
siR544431	TGGATATTGCTGAAGCCGTAG	124.092	siR85386	ACGGCTTCAGCAATATCCATG	0.0878836
siR549212	TGGGGAATGTGAGATGTAGAAG	25.4862	siR504279	TCTACATCTCACATTCCCCACC	0.0878836
siR551695	TGGTGATGTTCTTCCGGCGGG	2582.9	siR289326	CGCCGGAAGAACATCACCAGG	0.0878836
siR551890	TGGTGGAAGAACAAGGAGTGG	99.3964	siR92643	ACTCCTTGTTCTTCCACCAAG	0.0878836
siR552836	TGGTTGTAGTAGCCCCGCGGT	33.6594	siR290802	CGCGGGGCTACTACAACCAAT	0.527302
siR558449	TGTGACCCGGCTGAAGTGCATCAA	18.3677	siR369182	GATGCACTTCAGCCGGGTCACATG	0.0878836
siR560731	TGTGTCCATGCTTGAAGATGAA	10.6339	siR240672	CATCTTCAAGCATGGACACAGC	0.0878836
siR563565	TGTTGTGCTTCAGAACCAAGGCGT	39.4597	siR386592	GCCTTGGTTCTGAAGCACAACACG	0.703069
siR578711	TTCTCGGAGACTCCCAATCGGCGC	49.5664	siR384126	GCCGATTGGGAGTCTCCGAGAAGA	1.0546
siR579816	TTCTGTCAGGAGAACCAGCAAAGG	16.2585	siR599495	TTTGCTGGTTCTCCTGACAGAAGT	0.263651
siR581908	TTGACCAGAAGTAGAGACGAGACA	18.1919	siR508596	TCTCGTCTCTACTTCTGGTCAAGC	0.0878836
siR587991	TTGGCTCGATGCATGCACGATGAT	11.337	siR239556	CATCGTGCATGCATCGAGCCAAGG	0.0878836
siR589117	TTGGTGGCCACGGCGTTCTCT	19.4223	siR101577	AGAACGCCGTGGCCACCAACA	0.0878836
siR600795	TTTGTCGAACAACCACGAGGGCAT	10.9855	siR383250	GCCCTCGTGGTTGTTCGACAAAAT	0.0878836
siR603385	TTTTGGAGGGACCGACAAAAG	19.8617	siR600831	TTTGTCGGTCCCTCCAAAATT	1.40614
siRNA pairs in S_27DAF
name	siRNA	TPM	name	siRNA*	TPM
siR22425	AACGACTTAGGAGAGGATTTAA	12.4489	siR12598	AAATCCTCTCCTAAGTCGTTGG	2.31807
siR34697	AAGGATGGAAAAGAGGATGGT	28.0744	siR238752	CATCCTCTTTTCCATCCTTGC	0.171709
siR35835	AAGGGTTCATATGTGGTGGCT	35.1145	siR249569	CCACCACATATGAACCCTTGT	0.686836
siR39906	AATAATCGGAGCAAATCGTTGG	24.8978	siR23144	AACGATTTGCTCCGATTATTGG	0.171709
siR43838	AATCCCATAATCGTTGCATCA	21.8929	siR182981	ATGCAACGATTATGGGATTGA	2.06051
siR51968	AATTTGCAAACGGAGCTCGGG	25.3271	siR283474	CGAGCTCCGTTTGCAAATTAG	0.0858545
siR55937	ACAATTGATCTCAGAAGGCAAGTA	12.4489	siR334608	CTTGCCTTCTGAGATCAATTGTGT	0.0858545
siR99316	ACTTTGGATGTACATAGATCG	23.3524	siR175697	ATCTATGTACATCCAAAGTTT	0.257563
siR123949	AGCGGACTTCTGCAGAAAGGCACC	21.2061	siR536336	TGCCTTTCTGCAGAAGTCCGCTAT	1.97465
siR126319	AGCTGATGTTGGTAGGGCGGG	32.5389	siR288939	CGCCCTACCAACATCAGCTGC	0.0858545
siR130592	AGGAGTAATAGGGATGGCTGG	12.5348	siR120414	AGCCATCCCTATTACTCCTAG	0.0858545
siR131783	AGGATTCCAACGAACCAGTGGCTA	10.646	siR381539	GCCACTGGTTCGTTGGAATCCTCT	0.171709
siR152615	ATAATCGGAGCAAATCGTTGGG	51.1693	siR209272	CAACGATTTGCTCCGATTATTG	0.0858545
siR156895	ATAGATCGTTGAGGCCACCAA	11.8479	siR416405	GGTGGCCTCAACGATCTATGT	0.257563
siR161591	ATATGTAGGAGCAAATTGTGG	15.0245	siR55987	ACAATTTGCTCCTACATATAC	0.257563
siR171698	ATCCTCTCCTAAGTCGTTGGGC	18.1153	siR247290	CCAACGACTTAGGAGAGGATTT	1.71709
siR188682	ATGTACATAGATCGTTGAGGC	33.1398	siR314768	CTCAACGATCTATGTACATCC	0.858545
siR188683	ATGTACATAGATCGTTGAGGCC	14.2518	siR269609	CCTCAACGATCTATGTACATCC	0.0858545
siR188933	ATGTAGGAGCAAACTGTGGCA	26.8725	siR249347	CCACAGTTTGCTCCTACATAT	0.0858545
siR206011	CAAAGGGAAGCAATGAAGCAA	209.056	siR397134	GCTTCATTGCTTCCCTTTGTT	0.171709
siR211061	CAAGAACTTGCTGCGCGTGCA	16.1406	siR222661	CACGCGCAGCAAGTTCTTGTA	0.257563
siR212401	CAAGCGTTGTAGGTTAGTTGA	10.8177	siR24651	AACTAACCTACAACGCTTGGT	0.0858545
siR213700	CAAGTGATGTTGATGCTGCTA	15.7114	siR377233	GCAGCATCAACATCACTTGTA	0.171709
siR221282	CACCTCATCGTTGTCTTCGTCGTC	10.8177	siR279368	CGACGAAGACAACGATGAGGTGAT	3.60589
siR224460	CACTCGTCCAAGTAGAAGCAAGGT	18.1153	siR334837	CTTGCTTCTACTTGGACGAGTGCA	0.257563
siR229010	CAGCCACCAGTAGTAATCGTCGTC	10.7318	siR280252	CGACGATTACTACTGGTGGCTGCT	0.343418
siR231737	CAGGGACTGTTGTGATGGTTG	20.9485	siR68907	ACCATCACAACAGTCCCTGCA	0.0858545
siR235408	CATAGATCGTTGAGGCCACCA	40.695	siR434784	GTGGCCTCAACGATCTATGTA	3.69174
siR239356	CATCGGTAACATGTGGGTCAGGAT	15.5397	siR272180	CCTGACCCACATGTTACCGATGAC	0.171709
siR242519	CATGGATATTGCTGAAGCCGT	31.7662	siR408765	GGCTTCAGCAATATCCATGTC	0.171709
siR249543	CCACCAAGCGTTGTAGGTTAG	13.7367	siR20950	AACCTACAACGCTTGGTGGAA	0.257563
siR250793	CCACTGACTGCAGAAGAGAGAGGT	20.3475	siR320916	CTCTCTCTTCTGCAGTCAGTGGTA	0.171709
siR271644	CCTCTGTATATTGCTGGCTGC	25.5846	siR120074	AGCCAGCAATATACAGAGGCA	0.171709
siR282630	CGAGACGAGGATGGCCTGAACA	14.6811	siR572199	TTCAGGCCATCCTCGTCTCGCA	0.0858545
siR282669	CGAGACTGAGACCAAGACATTCGG	22.3222	siR346598	GAATGTCTTGGTCTCAGTCTCGGT	0.0858545
siR284776	CGAGTTGTAGATGAAGGCAGTGGA	30.3925	siR224801	CACTGCCTTCATCTACAACTCGGC	0.0858545
siR286901	CGATTGGGAGTCTCCGAGAAGATG	47.1341	siR514987	TCTTCTCGGAGACTCCCAATCGGC	4.55029
siR290206	CGCGAGCAGTGAACAACAGGGCAA	22.9231	siR383325	GCCCTGTTGTTCACTGCTCGCGAT	0.0858545
siR293709	CGGACTTCTGCAGAAAGGCACCAA	13.9943	siR416002	GGTGCCTTTCTGCAGAAGTCCGCT	0.944399
siR296308	CGGCGATGGCTAAGGAAGACTGGT	22.408	siR233285	CAGTCTTCCTTAGCCATCGCCGTT	0.515127
siR297119	CGGCTGTATTGAACAAAAGTGGCA	18.2012	siR251104	CCACTTTTGTTCAATACAGCCGGC	0.0858545
siR311300	CTAGACATGGATATTGCTGAA	11.9338	siR228515	CAGCAATATCCATGTCTAGTA	0.0858545
siR314998	CTCAATCTCCTTTTGTCGGTC	26.3573	siR259899	CCGACAAAAGGAGATTGAGAT	1.20196
siR324220	CTGATTGTGAAAGTGTGATGGAAA	11.5045	siR488767	TCCATCACACTTTCACAATCAGAG	0.0858545
siR346608	GAATGTGAGATGTAGAAGGTT	26.0998	siR274121	CCTTCTACATCTCACATTCCC	0.0858545
siR356635	GAGAACGGGCGGCAAAGAAGACAC	10.3884	siR430316	GTCTTCTTTGCCGCCCGTTCTCAT	0.257563
siR358596	GAGATTGAGATGACAAAGGAC	12.4489	siR275061	CCTTTGTCATCTCAATCTCCT	0.171709
siR360683	GAGGACGAGAAATGTTGGCAA	72.2895	siR380858	GCCAACATTTCTCGTCCTCTC	0.858545
siR362059	GAGGGCTTGACCAGAAGTAGAGAC	14.767	siR320174	CTCTACTTCTGGTCAAGCCCTCGG	0.171709
siR364153	GAGTTGTAGATGAAGGCAGTGGAG	19.2314	siR250856	CCACTGCCTTCATCTACAACTCGG	0.0858545
siR397920	GCTTGGTGGAAGAACAAGGAG	34.3418	siR274755	CCTTGTTCTTCCACCAAGCGT	0.0858545
siR399872	GGAATGTGAGATGTAGAAGGT	33.9984	siR332755	CTTCTACATCTCACATTCCCC	0.0858545
siR402240	GGAGGAGTTCTGCTAGGAAGGCTG	12.5348	siR386449	GCCTTCCTAGCAGAACTCCTCCAT	0.171709
siR416645	GGTGGTGTTGCTGAAGTATGACGG	21.7212	siR425128	GTCATACTTCAGCAACACCACCGT	0.0858545
siR422421	GTAGTCTCAACGATCTAGGTA	14.4236	siR269014	CCTAGATCGTTGAGACTACTG	0.171709
siR433779	GTGGAAGAACAAGGAGTGGAT	14.3377	siR250704	CCACTCCTTGTTCTTCCACCA	0.0858545
siR442770	GTTGGTATGGCTTAGTGGTAACGG	11.1611	siR438795	GTTACCACTAAGCCATACCAACCC	0.0858545
siR448001	TAACATCAGAATGCAGGGACT	32.3671	siR490886	TCCCTGCATTCTGATGTTACA	0.0858545
siR464379	TAGCGGACTTCTGCAGAAAGGCAC	24.3827	siR386657	GCCTTTCTGCAGAAGTCCGCTATT	0.171709
siR465449	TAGGAGTAATAGGGATGGCTGG	16.5699	siR120415	AGCCATCCCTATTACTCCTAGT	0.0858545
siR473630	TATGTAAGAACGTCGAGCATG	11.0752	siR539157	TGCTCGACGTTCTTACATAGT	1.54538
siR477102	TCAACCATAGTAGGAACTAGA	22.5797	siR468457	TAGTTCCTACTATGGTTGAAC	0.171709
siR478529	TCAATCTCCTTTTGTCGGTCC	61.3001	siR72312	ACCGACAAAAGGAGATTGAGA	0.0858545
siR485493	TCATGTAGACGACGATACTCTCAT	12.0196	siR357961	GAGAGTATCGTCGTCTACATGAGC	0.0858545
siR490036	TCCCCGATGATGGCTTCTGCA	58.2952	siR226146	CAGAAGCCATCATCGGGGACA	0.171709
siR491244	TCCGAAGAGCTAGAAGTTTGTCAT	17.2568	siR347208	GACAAACTTCTAGCTCTTCGGATC	0.0858545
siR493088	TCCGGTTTTCAGTTGATTTGGCAC	14.2518	siR380793	GCCAAATCAACTGAAAACCGGAAA	0.0858545
siR495259	TCCTCTCCTAAGTCGTTGGGC	27.5593	siR247289	CCAACGACTTAGGAGAGGATT	1.11611
siR498319	TCGAGCATGAGGACTGAAGGG	81.3901	siR331185	CTTCAGTCCTCATGCTCGACG	0.0858545
siR505552	TCTAGTATGATGCATCGGTTA	37.3467	siR73214	ACCGATGCATCATACTAGACA	0.0858545
siR506428	TCTCAATCTCCTTTTGTCGGT	30.0491	siR277731	CGACAAAAGGAGATTGAGATG	0.858545
siR511710	TCTGGAGCTCGTAGATGAAGGAGT	12.1913	siR496285	TCCTTCATCTACGAGCTCCAGACT	0.171709
siR512472	TCTGTCAGGAGAACCAGCAAAGGA	38.0335	siR337203	CTTTGCTGGTTCTCCTGACAGAAG	0.257563
siR516788	TCTTTGATAAGAACGCTGGCA	200.47	siR251876	CCAGCGTTCTTATCAAAGATG	0.0858545
siR520699	TGACAAACTTCTAGCTCTTCGGAT	11.3328	siR259639	CCGAAGAGCTAGAAGTTTGTCATC	0.343418
siR524713	TGAGACGGAGGGAATACATTAGTG	12.5348	siR308474	CTAATGTATTCCCTCCGTCTCAAA	0.0858545
siR525782	TGAGCTCGCGACGTCATCCTCT	13.3074	siR131402	AGGATGACGTCGCGAGCTCAAC	0.0858545
siR528647	TGATGCAACGATTATGGGATT	16.9992	siR489766	TCCCATAATCGTTGCATCATA	3.17662
siR528650	TGATGCAACGGTTATGGGATT	32.8823	siR489760	TCCCATAACCGTTGCATCATA	0.171709
siR528657	TGATGCAAGTGATGTAGCGCCC	750.111	siR388596	GCGCTACATCACTTGCATCATG	0.0858545
siR529416	TGATGTTGGTAGGGCATGTGA	42.7555	siR64293	ACATGCCCTACCAACATCAGC	0.343418
siR530121	TGATTTGTATGAGTGAAGATTGAC	12.6206	siR215186	CAATCTTCACTCATACAAATCATT	0.171709
siR544431	TGGATATTGCTGAAGCCGTAG	160.29	siR85386	ACGGCTTCAGCAATATCCATG	0.0858545
siR548478	TGGGATGAATTAGGAACGGCC	18.287	siR267760	CCGTTCCTAATTCATCCCACC	0.171709
siR550636	TGGTATGGCTTAGTGGTAACGGAA	16.4841	siR267680	CCGTTACCACTAAGCCATACCAAC	0.0858545
siR550748	TGGTCAAGAAGAAGAACATGA	12.8782	siR191317	ATGTTCTTCTTCTTGACCATT	0.0858545
siR551998	TGGTGGGGAATGTGAGATGTA	17.9436	siR239948	CATCTCACATTCCCCACCAAC	0.0858545
siR552836	TGGTTGTAGTAGCCCCGCGGT	52.4571	siR290802	CGCGGGGCTACTACAACCAAT	1.71709
siR553583	TGTACATAGATCGTTGAGGCC	224.338	siR269608	CCTCAACGATCTATGTACATC	0.0858545
siR559900	TGTGGCGGATTCAACGGAGGA	23.7817	siR317655	CTCCGTTGAATCCGCCACATC	0.0858545
siR563565	TGTTGTGCTTCAGAACCAAGGCGT	22.5797	siR386592	GCCTTGGTTCTGAAGCACAACACG	1.03025
siR578626	TTCTCCTGTAGTTTTTAACCGGTA	12.363	siR265914	CCGGTTAAAAACTACAGGAGAAAC	0.0858545
siR578711	TTCTCGGAGACTCCCAATCGGCGC	27.731	siR384126	GCCGATTGGGAGTCTCCGAGAAGA	2.40393
siR579816	TTCTGTCAGGAGAACCAGCAAAGG	15.5397	siR599495	TTTGCTGGTTCTCCTGACAGAAGT	0.515127
siR598508	TTTGATAAGAACGCTGGCATG	66.3655	siR534314	TGCCAGCGTTCTTATCAAAGA	0.0858545
siR601379	TTTGTTTCAACAGAGCTCATCTAA	11.4186	siR113949	AGATGAGCTCTGTTGAAACAAAAT	0.0858545
siR603385	TTTTGGAGGGACCGACAAAAG	30.2208	siR600831	TTTGTCGGTCCCTCCAAAATT	1.28782
siRNA pairs in S_35DAF
name	siRNA	TPM	name	siRNA*	TPM
siR22425	AACGACTTAGGAGAGGATTTAA	13.9796	siR12598	AAATCCTCTCCTAAGTCGTTGG	3.65909
siR35835	AAGGGTTCATATGTGGTGGCT	32.7442	siR249569	CCACCACATATGAACCCTTGT	0.375291
siR39906	AATAATCGGAGCAAATCGTTGG	24.2063	siR23144	AACGATTTGCTCCGATTATTGG	0.281468
siR43838	AATCCCATAATCGTTGCATCA	27.2086	siR182981	ATGCAACGATTATGGGATTGA	3.09615
siR62294	ACATAGATCGTTGAGGCCACC	11.5402	siR546584	TGGCCTCAACGATCTATGTAC	4.1282
siR82672	ACGATTGTTGTTGTACCGGAG	11.8217	siR265401	CCGGTACAACAACAATCGTGT	0.0938228
siR99316	ACTTTGGATGTACATAGATCG	25.5198	siR175697	ATCTATGTACATCCAAAGTTT	0.281468
siR100360	AGAAACGGATCACTGAGTGGAATC	10.6958	siR573583	TTCCACTCAGTGATCCGTTTCTTC	0.0938228
siR101845	AGAACTTCTGGATGGTAGAGAACA	14.4487	siR578801	TTCTCTACCATCCAGAAGTTCTGC	0.187646
siR106292	AGACGAGATTGTGCATAGCCTACC	22.7051	siR465949	TAGGCTATGCACAATCTCGTCTAT	0.187646
siR123949	AGCGGACTTCTGCAGAAAGGCACC	20.5472	siR536336	TGCCTTTCTGCAGAAGTCCGCTAT	3.00233
siR126319	AGCTGATGTTGGTAGGGCGGG	34.2453	siR288939	CGCCCTACCAACATCAGCTGC	0.375291
siR156895	ATAGATCGTTGAGGCCACCAA	10.8834	siR416405	GGTGGCCTCAACGATCTATGT	0.0938228
siR161591	ATATGTAGGAGCAAATTGTGG	15.4808	siR55987	ACAATTTGCTCCTACATATAC	0.0938228
siR171698	ATCCTCTCCTAAGTCGTTGGGC	32.0874	siR247290	CCAACGACTTAGGAGAGGATTT	1.12587
siR186391	ATGGATATTGCTGAAGCCGTA	15.4808	siR297204	CGGCTTCAGCAATATCCATGT	0.281468
siR188682	ATGTACATAGATCGTTGAGGC	29.0851	siR314768	CTCAACGATCTATGTACATCC	0.844405
siR188683	ATGTACATAGATCGTTGAGGCC	17.3572	siR269609	CCTCAACGATCTATGTACATCC	0.281468
siR211061	CAAGAACTTGCTGCGCGTGCA	17.8263	siR222661	CACGCGCAGCAAGTTCTTGTA	0.469114
siR212774	CAAGGAGTGGATTTGTGCTTC	11.4464	siR116931	AGCACAAATCCACTCCTTGTT	0.0938228
siR213700	CAAGTGATGTTGATGCTGCTA	19.046	siR377233	GCAGCATCAACATCACTTGTA	0.0938228
siR221282	CACCTCATCGTTGTCTTCGTCGTC	14.5425	siR279368	CGACGAAGACAACGATGAGGTGAT	3.94056
siR224460	CACTCGTCCAAGTAGAAGCAAGGT	17.7325	siR334837	CTTGCTTCTACTTGGACGAGTGCA	0.281468
siR231737	CAGGGACTGTTGTGATGGTTG	18.6707	siR68907	ACCATCACAACAGTCCCTGCA	0.0938228
siR235408	CATAGATCGTTGAGGCCACCA	46.067	siR434784	GTGGCCTCAACGATCTATGTA	1.59499
siR239356	CATCGGTAACATGTGGGTCAGGAT	14.824	siR272180	CCTGACCCACATGTTACCGATGAC	0.187646
siR244908	CATTGATCAAGTGTAGTCGTGCAT	18.6707	siR375760	GCACGACTACACTTGATCAATGAC	0.0938228
siR249543	CCACCAAGCGTTGTAGGTTAG	13.229	siR20950	AACCTACAACGCTTGGTGGAA	0.0938228
siR282669	CGAGACTGAGACCAAGACATTCGG	25.426	siR346598	GAATGTCTTGGTCTCAGTCTCGGT	0.0938228
siR286041	CGATGATCAGTTGTCGGAGCGGAC	12.1031	siR263271	CCGCTCCGACAACTGATCATCGGC	0.0938228
siR286901	CGATTGGGAGTCTCCGAGAAGATG	31.5245	siR514987	TCTTCTCGGAGACTCCCAATCGGC	7.13053
siR296308	CGGCGATGGCTAAGGAAGACTGGT	21.8607	siR233285	CAGTCTTCCTTAGCCATCGCCGTT	0.375291
siR311476	CTAGAGCTCGTAGAAGAAAGCAAT	30.3986	siR541316	TGCTTTCTTCTACGAGCTCTAGAT	0.0938228
siR314979	CTCAATCCCATAATCGTTGCA	17.7325	siR209255	CAACGATTATGGGATTGAGCA	0.187646
siR314998	CTCAATCTCCTTTTGTCGGTC	29.5542	siR259899	CCGACAAAAGGAGATTGAGAT	1.78263
siR358596	GAGATTGAGATGACAAAGGAC	12.0093	siR275061	CCTTTGTCATCTCAATCTCCT	0.281468
siR360683	GAGGACGAGAAATGTTGGCAA	59.5775	siR380858	GCCAACATTTCTCGTCCTCTC	0.281468
siR362059	GAGGGCTTGACCAGAAGTAGAGAC	13.1352	siR320174	CTCTACTTCTGGTCAAGCCCTCGG	0.469114
siR395713	GCTGGAGTATATGTAGGAGCA	11.3526	siR317735	CTCCTACATATACTCCAGCCA	0.187646
siR402240	GGAGGAGTTCTGCTAGGAAGGCTG	14.5425	siR386449	GCCTTCCTAGCAGAACTCCTCCAT	0.469114
siR421594	GTAGCCTCAACGATCTAGGTA	12.4784	siR269016	CCTAGATCGTTGAGGCTACCG	0.0938228
siR422421	GTAGTCTCAACGATCTAGGTA	15.6684	siR269014	CCTAGATCGTTGAGACTACTG	0.562937
siR429925	GTCTGTTGTGTGGGGATGGTAGGA	10.9773	siR309474	CTACCATCCCCACACAACAGACAC	0.0938228
siR442770	GTTGGTATGGCTTAGTGGTAACGG	13.229	siR438795	GTTACCACTAAGCCATACCAACCC	0.0938228
siR448001	TAACATCAGAATGCAGGGACT	30.7739	siR490886	TCCCTGCATTCTGATGTTACA	0.187646
siR454547	TACATAGATCGTTGAGGCCACC	12.4784	siR546585	TGGCCTCAACGATCTATGTACA	0.469114
siR456918	TACCTAGATCGTTGAGGCTAC	18.3893	siR122171	AGCCTCAACGATCTAGGTACG	0.469114
siR456934	TACCTAGGATGAGACACGGCGATT	10.602	siR499593	TCGCCGTGTCTCATCCTAGGTAGC	0.0938228
siR461825	TAGACACGGATATTGCTAAAG	11.5402	siR567826	TTAGCAATATCCGTGTCTAGT	0.187646
siR473630	TATGTAAGAACGTCGAGCATG	12.5723	siR539157	TGCTCGACGTTCTTACATAGT	0.375291
siR477102	TCAACCATAGTAGGAACTAGA	38.9365	siR468457	TAGTTCCTACTATGGTTGAAC	0.469114
siR478529	TCAATCTCCTTTTGTCGGTCC	71.3992	siR72312	ACCGACAAAAGGAGATTGAGA	0.0938228
siR480434	TCACGGTGATTATGGAGGATA	21.4854	siR494709	TCCTCCATAATCACCGTGAGA	0.375291
siR490036	TCCCCGATGATGGCTTCTGCA	65.113	siR226146	CAGAAGCCATCATCGGGGACA	0.0938228
siR491244	TCCGAAGAGCTAGAAGTTTGTCAT	17.1696	siR347208	GACAAACTTCTAGCTCTTCGGATC	0.562937
siR491249	TCCGAAGAGCTGGAAGTTTGTCAT	11.9155	siR347205	GACAAACTTCCAGCTCTTCGGATC	0.562937
siR493088	TCCGGTTTTCAGTTGATTTGGCAC	19.1399	siR380793	GCCAAATCAACTGAAAACCGGAAA	0.0938228
siR495259	TCCTCTCCTAAGTCGTTGGGC	35.3712	siR247289	CCAACGACTTAGGAGAGGATT	0.281468
siR500593	TCGGAGCAACAAAGGGAAGGA	41.3759	siR331860	CTTCCCTTTGTTGCTCCGAAT	0.0938228
siR503278	TCGTTGAGCTCGCGACGTCATC	10.6958	siR523411	TGACGTCGCGAGCTCAACGATA	3.00233
siR504208	TCTACACGTAGAGGATGACGTC	60.4219	siR302275	CGTCATCCTCTACGTGTAGATG	0.0938228
siR505552	TCTAGTATGATGCATCGGTTA	41.4697	siR73214	ACCGATGCATCATACTAGACA	0.0938228
siR506428	TCTCAATCTCCTTTTGTCGGT	34.1515	siR277731	CGACAAAAGGAGATTGAGATG	0.65676
siR511710	TCTGGAGCTCGTAGATGAAGGAGT	12.0093	siR496285	TCCTTCATCTACGAGCTCCAGACT	0.375291
siR512472	TCTGTCAGGAGAACCAGCAAAGGA	40.5315	siR337203	CTTTGCTGGTTCTCCTGACAGAAG	0.0938228
siR520699	TGACAAACTTCTAGCTCTTCGGAT	11.5402	siR259639	CCGAAGAGCTAGAAGTTTGTCATC	0.469114
siR525782	TGAGCTCGCGACGTCATCCTCT	14.1672	siR131402	AGGATGACGTCGCGAGCTCAAC	0.0938228
siR528647	TGATGCAACGATTATGGGATT	14.1672	siR489766	TCCCATAATCGTTGCATCATA	5.53555
siR528650	TGATGCAACGGTTATGGGATT	33.7762	siR489760	TCCCATAACCGTTGCATCATA	0.375291
siR536810	TGCGATCTTCTTCAAGCGGGC	10.6958	siR263496	CCGCTTGAAGAAGATCGCATC	0.0938228
siR540469	TGCTGTTCCTGAGTAGACTGA	18.7646	siR144180	AGTCTACTCAGGAACAGCAGA	0.0938228
siR542225	TGGAATGAGAGTTTGGTGGAT	34.6206	siR249517	CCACCAAACTCTCATTCCATC	0.0938228
siR544431	TGGATATTGCTGAAGCCGTAG	198.06	siR85386	ACGGCTTCAGCAATATCCATG	0.0938228
siR550748	TGGTCAAGAAGAAGAACATGA	12.0093	siR191317	ATGTTCTTCTTCTTGACCATT	0.0938228
siR551890	TGGTGGAAGAACAAGGAGTGG	108.553	siR92643	ACTCCTTGTTCTTCCACCAAG	0.0938228
siR551891	TGGTGGAAGAACAAGGAGTGGA	10.8834	siR224401	CACTCCTTGTTCTTCCACCAAG	0.0938228
siR552836	TGGTTGTAGTAGCCCCGCGGT	48.5064	siR290802	CGCGGGGCTACTACAACCAAT	0.844405
siR553583	TGTACATAGATCGTTGAGGCC	284.283	siR269608	CCTCAACGATCTATGTACATC	0.0938228
siR558449	TGTGACCCGGCTGAAGTGCATCAA	16.7943	siR369182	GATGCACTTCAGCCGGGTCACATG	0.0938228
siR563565	TGTTGTGCTTCAGAACCAAGGCGT	32.0874	siR386592	GCCTTGGTTCTGAAGCACAACACG	0.844405
siR576729	TTCGGAGCAACAAAGGGAAGG	30.1171	siR574495	TTCCCTTTGTTGCTCCGAATA	0.281468
siR578710	TTCTCGGAGACTCCCAATCGGCG	13.6043	siR262045	CCGATTGGGAGTCTCCGAGAAGA	0.0938228
siR578711	TTCTCGGAGACTCCCAATCGGCGC	44.1905	siR384126	GCCGATTGGGAGTCTCCGAGAAGA	1.2197
siR579816	TTCTGTCAGGAGAACCAGCAAAGG	16.419	siR599495	TTTGCTGGTTCTCCTGACAGAAGT	0.281468
siR581908	TTGACCAGAAGTAGAGACGAGACA	12.5723	siR508596	TCTCGTCTCTACTTCTGGTCAAGC	0.187646
siR597799	TTTGAACTGTTGTCTGCATAAACC	33.1195	siR594489	TTTATGCAGACAACAGTTCAAAGA	0.0938228
siR603385	TTTTGGAGGGACCGACAAAAG	33.5886	siR600831	TTTGTCGGTCCCTCCAAAATT	2.53322
siRNA pairs in I_10DAF
name	siRNA	TPM	name	siRNA*	TPM
siR396	AAAAACTCGACGAGATTGGAGGTG	36.3712	siR270044	CCTCCAATCTCGTCGAGTTTTTGT	0.257952
siR1389	AAAACCGACAAGAAGACACATGAT	29.4925	siR243572	CATGTGTCTTCTTGTCGGTTTTGC	0.171968
siR1544	AAAACGACAACCAGCTTAGAGCAT	49.4407	siR393977	GCTCTAAGCTGGTTGTCGTTTTAC	3.86927
siR1986	AAAAGACCCATGGATACCCTAGAG	24.1615	siR312425	CTAGGGTATCCATGGGTCTTTTGG	0.0859839
siR2004	AAAAGACCGAGCTGCACTAGAAGG	13.3275	siR578048	TTCTAGTGCAGCTCGGTCTTTTCC	0.257952
siR2028	AAAAGACGATCCTAGCAGAGCTTC	16.6809	siR126051	AGCTCTGCTAGGATCGTCTTTTTC	0.257952
siR2135	AAAAGATGAGATGTATGCGGTTGG	18.6585	siR20355	AACCGCATACATCTCATCTTTTGC	0.0859839
siR2160	AAAAGATGTCATGAGCTTGCTGTA	18.7445	siR228486	CAGCAAGCTCATGACATCTTTTAC	1.20377
siR2433	AAAAGGAGCACACAGCATCGTCAC	20.2062	siR352360	GACGATGCTGTGTGCTCCTTTTTT	0.0859839
siR2443	AAAAGGATCTGAAACAGCTCGGTA	158.296	siR261192	CCGAGCTGTTTCAGATCCTTTTGG	0.0859839
siR2480	AAAAGGCGGCAAGCAGTCACTCTC	18.5725	siR363561	GAGTGACTGCTTGCCGCCTTTTCA	0.171968
siR3100	AAAATAGCATGAGTGGGGGCTGAG	37.317	siR229128	CAGCCCCCACTCATGCTATTTTCT	0.0859839
siR3177	AAAATATATTCATGGTCGTCTGTA	17.9706	siR226757	CAGACGACCATGAATATATTTTAG	0.429919
siR3377	AAAATCCATCAAGCAGCTACTCGT	12.8116	siR363028	GAGTAGCTGCTTGATGGATTTTTT	0.515903
siR4386	AAACAATGATCGAGACGGTTATGC	11.3499	siR151203	ATAACCGTCTCGATCATTGTTTGC	0.171968
siR4456	AAACACAGTAGGGGTAGAAGAGAC	38.0049	siR321852	CTCTTCTACCCCTACTGTGTTTTC	0.0859839
siR4563	AAACACGCAAGAAGATGAAATCTG	13.5855	siR372736	GATTTCATCTTCTTGCGTGTTTCT	0.171968
siR4738	AAACAGGAGGTAGGCAAAGTTGGT	216.421	siR210802	CAACTTTGCCTACCTCCTGTTTAT	0.0859839
siR4821	AAACATACAAAATTAATTCTGGCA	20.3782	siR251240	CCAGAATTAATTTTGTATGTTTGC	0.171968
siR5027	AAACATGCCTCTTAGTATCGTTGC	12.5536	siR22680	AACGATACTAAGAGGCATGTTTAG	0.0859839
siR5153	AAACATTGTGATCCTCCTGACTGT	65.5197	siR142651	AGTCAGGAGGATCACAATGTTTTG	0.257952
siR5665	AAACCGAGTCTGGACAGTGGCATT	62.5103	siR534231	TGCCACTGTCCAGACTCGGTTTGT	4.12723
siR5859	AAACCTACTGGCATACTTAGAACC	45.8294	siR577582	TTCTAAGTATGCCAGTAGGTTTGA	0.0859839
siR6022	AAACGACAACCAGCTTAGAGCATC	42.0461	siR539292	TGCTCTAAGCTGGTTGTCGTTTTA	1.11779
siR6313	AAACGCCATCGCCAGACAACACGC	11.4359	siR438267	GTGTTGTCTGGCGATGGCGTTTCG	0.343936
siR6367	AAACGCTGGGCTGCGGAGATGG	31.9	siR176305	ATCTCCGCAGCCCAGCGTTTGG	0.0859839
siR6909	AAACTCCTCTACATTGATCGTTGC	113.585	siR22759	AACGATCAATGTAGAGGAGTTTGA	3.35337
siR6920	AAACTCGACGAGATTGGAGGTGGC	38.3488	siR221292	CACCTCCAATCTCGTCGAGTTTTT	0.343936
siR7570	AAAGAAAAACTGCAGCGGAAAACA	15.1332	siR602413	TTTTCCGCTGCAGTTTTTCTTTAT	0.343936
siR7699	AAAGAAGGCACCTGTCATACTTGC	38.7787	siR36998	AAGTATGACAGGTGCCTTCTTTCT	0.343936
siR7701	AAAGAAGGTGGAACTAGAAGGTGT	117.282	siR78466	ACCTTCTAGTTCCACCTTCTTTCC	0.0859839
siR7906	AAAGACCGAGCTACACCAAAAGGA	59.5008	siR337899	CTTTTGGTGTAGCTCGGTCTTTTC	0.515903
siR7913	AAAGACCGAGCTGCACCAGAAGGA	32.5879	siR333394	CTTCTGGTGCAGCTCGGTCTTTTC	0.0859839
siR7915	AAAGACCGAGCTGCACTAGAAGGA	49.1828	siR332859	CTTCTAGTGCAGCTCGGTCTTTTC	0.257952
siR7990	AAAGACGATCCTAGCAGAGCTTCA	122.441	siR33464	AAGCTCTGCTAGGATCGTCTTTTT	0.0859839
siR8053	AAAGACTAATAAGGGGGCATTTGC	16.079	siR13455	AAATGCCCCCTTATTAGTCTTTAC	0.257952
siR8070	AAAGACTCGCTACAAAGACCTGGC	17.9706	siR232250	CAGGTCTTTGTAGCGAGTCTTTGG	0.171968
siR8103	AAAGACTTTCAGGCACCATTGATG	36.7151	siR478694	TCAATGGTGCCTGAAAGTCTTTGG	0.257952
siR8369	AAAGATCCAGGCAGCAGGAACAAC	17.2828	siR562370	TGTTCCTGCTGCCTGGATCTTTGC	0.0859839
siR8479	AAAGATGAGATGTATGCGGTTGGA	13.3275	siR208557	CAACCGCATACATCTCATCTTTTG	0.0859839
siR8540	AAAGATGGGGACTATGCAATATAG	28.2887	siR162368	ATATTGCATAGTCCCCATCTTTCA	0.0859839
siR8584	AAAGATTCAGCGTTGGGACCAATA	126.568	siR588847	TTGGTCCCAACGCTGAATCTTTCC	0.0859839
siR8620	AAAGATTGTATTCTGCACCGTGCA	16.5949	siR223229	CACGGTGCAGAATACAATCTTTGT	0.0859839
siR8735	AAAGCACTTTGAGACGTAGATTAT	31.4701	siR45095	AATCTACGTCTCAAAGTGCTTTTT	0.0859839
siR8746	AAAGCAGAGAAGGAACAAGGAGGA	63.2841	siR318396	CTCCTTGTTCCTTCTCTGCTTTGC	0.0859839
siR8986	AAAGCCTAAGACTGCATAGCCACT	84.2642	siR547297	TGGCTATGCAGTCTTAGGCTTTCT	0.0859839
siR9045	AAAGCGACGCCGGGGCAGATATGG	12.3817	siR160745	ATATCTGCCCCGGCGTCGCTTTCC	0.343936
siR9169	AAAGCTCAAAGACGTGGATCAGGA	11.8658	siR323879	CTGATCCACGTCTTTGAGCTTTGT	0.0859839
siR9212	AAAGCTGAGATGGAGATAGGATAG	52.5362	siR171255	ATCCTATCTCCATCTCAGCTTTGA	0.257952
siR9313	AAAGGAACTGGTGAACGACTTGGC	51.4184	siR213602	CAAGTCGTTCACCAGTTCCTTTGC	0.171968
siR9337	AAAGGAATGAATTGAAGGATGGTG	51.9343	siR253760	CCATCCTTCAATTCATTCCTTTCT	0.0859839
siR9512	AAAGGCATCAAGTGGAAATCCTCT	13.4995	siR131952	AGGATTTCCACTTGATGCCTTTTA	0.0859839
siR9574	AAAGGCGGCAAGCAGTCACTCTCA	28.9766	siR111591	AGAGTGACTGCTTGCCGCCTTTTC	5.07305
siR9585	AAAGGCTAAGACTACACCATATAT	11.3499	siR161502	ATATGGTGTAGTCTTAGCCTTTGC	0.945823
siR9616	AAAGGCTTGTGAAGATGTTCCCAT	52.4502	siR409058	GGGAACATCTTCACAAGCCTTTGC	0.0859839
siR9762	AAAGGTCCGAACAAGCACAACTGA	12.0377	siR149519	AGTTGTGCTTGTTCGGACCTTTCG	0.257952
siR9778	AAAGGTCTTTGAATAGTTGGAGGG	17.2828	siR316262	CTCCAACTATTCAAAGACCTTTAG	0.0859839
siR10516	AAAGTGAGCACAAGTTGAGATTGG	14.1014	siR45261	AATCTCAACTTGTGCTCACTTTGT	0.0859839
siR11561	AAATACTTAGGGCTTGTTTGGTAC	17.1108	siR65868	ACCAAACAAGCCCTAAGTATTTCA	0.171968
siR11593	AAATAGAATTGGGCCGCACAGAGG	11.3499	siR512884	TCTGTGCGGCCCAATTCTATTTGT	0.171968
siR11849	AAATATATTCATGGTCGTCTGTAT	30.0944	siR59879	ACAGACGACCATGAATATATTTTA	1.03181
siR12286	AAATCATAGTAGAAGAGAGCTTGC	263.283	siR33453	AAGCTCTCTTCTACTATGATTTAT	0.0859839
siR12509	AAATCCGGAAGCAGCATAGATCAC	169.474	siR367478	GATCTATGCTGCTTCCGGATTTAC	0.0859839
siR12656	AAATCGACTAGGGCTTCCACGGTG	64.7459	siR267443	CCGTGGAAGCCCTAGTCGATTTAG	0.0859839
siR12832	AAATCTGAGATGCAAGAAGCCGTA	21.238	siR297257	CGGCTTCTTGCATCTCAGATTTCT	0.257952
siR13068	AAATGAAGTCTGACTTATGGTTGT	10.1461	siR19186	AACCATAAGTCAGACTTCATTTGC	0.343936
siR13541	AAATGCGGGAGACGAGATGAAGAG	17.8846	siR331327	CTTCATCTCGTCTCCCGCATTTGC	0.343936
siR13552	AAATGCGTAACTTTCCGATCGTCA	15.821	siR82121	ACGATCGGAAAGTTACGCATTTTT	1.97763
siR13818	AAATGGTTTTCTTTTGAATGTTGC	10.0601	siR18228	AACATTCAAAAGAAAACCATTTAA	0.0859839
siR13846	AAATGTAGAATCAGCCGGCTGGCA	13.4995	siR251794	CCAGCCGGCTGATTCTACATTTAA	0.0859839
siR14682	AAATTGTATCCATCGTCACATATT	11.4359	siR473939	TATGTGACGATGGATACAATTTAG	0.945823
siR15020	AACAAAATGCAGGAGTAGTAGAAC	15.0472	siR504685	TCTACTACTCCTGCATTTTGTTTT	0.0859839
siR15358	AACAACCACTGAGATCGAGATAGC	12.2097	siR471979	TATCTCGATCTCAGTGGTTGTTGG	0.0859839
siR15453	AACAACGAGTAGAATGAGAGGTGG	75.3219	siR77189	ACCTCTCATTCTACTCGTTGTTTC	0.0859839
siR15462	AACAACGCCGAGAACATGACCGCA	125.364	siR299236	CGGTCATGTTCTCGGCGTTGTTGA	0.687871
siR15547	AACAAGACCGCAACAACCTATATT	14.3593	siR469749	TATAGGTTGTTGCGGTCTTGTTAA	1.11779
siR15578	AACAAGATAATGGGGTACTTTCAC	23.4736	siR339732	GAAAGTACCCCATTATCTTGTTCG	0.0859839
siR15691	AACAAGGCACATATGTAGATGGAG	42.734	siR253979	CCATCTACATATGTGCCTTGTTAT	0.0859839
siR15989	AACAATGTCGACGAGGAGGAGG	19.3464	siR494888	TCCTCCTCGTCGACATTGTTGC	0.429919
siR15990	AACAATGTCGACGAGGAGGAGGAT	16.5089	siR270566	CCTCCTCCTCGTCGACATTGTTGC	0.429919
siR16029	AACAATTTGAGTGTGGACAGCTAT	23.9895	siR126948	AGCTGTCCACACTCAAATTGTTGT	0.171968
siR16046	AACACAAACGATAGAGAGATGACG	46.2593	siR484754	TCATCTCTCTATCGTTTGTGTTAT	0.945823
siR16144	AACACACGGCACCTGAATGACGGA	32.8458	siR302378	CGTCATTCAGGTGCCGTGTGTTGT	0.257952
siR16185	AACACAGTAGACGAGGACGCG	60.2747	siR302952	CGTCCTCGTCTACTGTGTTCT	0.171968
siR16308	AACACCAGAACCCTATAGCGTCGT	14.8752	siR352852	GACGCTATAGGGTTCTGGTGTTGA	0.0859839
siR16333	AACACCCACCAGCAGTCGTACTGA	11.6938	siR140663	AGTACGACTGCTGGTGGGTGTTGC	0.171968
siR16760	AACAGAAGAGTAGAGCAACAAAAG	28.4607	siR601311	TTTGTTGCTCTACTCTTCTGTTTT	0.0859839
siR16813	AACAGACGTGGCGAGAAAGAGGGA	674.2	siR271875	CCTCTTTCTCGCCACGTCTGTTGC	0.0859839
siR16931	AACAGATCGGCATACCTCGCA	21.0661	siR284175	CGAGGTATGCCGATCTGTTGT	0.171968
siR16934	AACAGATCGGCATACCTCGCAACC	116.25	siR585349	TTGCGAGGTATGCCGATCTGTTGT	5.41698
siR17149	AACAGGAAGCATGTGTGTAATCAG	11.6078	siR371370	GATTACACACATGCTTCCTGTTGC	0.0859839
siR17165	AACAGGAGGGTAGGCATTGTGTAG	32.4159	siR56276	ACACAATGCCTACCCTCCTGTTAT	0.171968
siR17175	AACAGGCATGAGGAGGTAGGTA	22.9577	siR268714	CCTACCTCCTCATGCCTGTTGC	0.0859839
siR17176	AACAGGCATGAGGAGGTAGGTAGG	325.363	siR456891	TACCTACCTCCTCATGCCTGTTGC	0.601887
siR17309	AACAGTCGAAGAGGAAACGTGAAG	71.6246	siR480528	TCACGTTTCCTCTTCGACTGTTGC	1.28976
siR17618	AACATATTTTGTATTGGTCTGTCA	36.4572	siR59807	ACAGACCAATACAAAATATGTTAT	0.257952
siR17659	AACATCACGATCAATCAGGAACTG	15.993	siR440315	GTTCCTGATTGATCGTGATGTTTT	0.859839
siR18071	AACATGGAGTTGGGTACGTAAACA	31.2121	siR593550	TTTACGTACCCAACTCCATGTTCG	0.0859839
siR18440	AACCAAAGACTTTCAGGCACCATT	16.079	siR551797	TGGTGCCTGAAAGTCTTTGGTTGT	0.515903
siR18604	AACCAAGGAGCTAGAGCGACAGCG	68.1852	siR328392	CTGTCGCTCTAGCTCCTTGGTTTG	0.343936
siR18977	AACCAGAAGTAAGACAAAAACACC	32.5879	siR564525	TGTTTTTGTCTTACTTCTGGTTAT	0.343936
siR19486	AACCCAAGTGACTACAGAAGATAT	48.3229	siR179043	ATCTTCTGTAGTCACTTGGGTTAA	1.80566
siR20093	AACCGACAAGAAGACACATGATGG	20.3782	siR167019	ATCATGTGTCTTCTTGTCGGTTTT	0.687871
siR20336	AACCGCACGACACCTGAATGACGA	26.9989	siR425630	GTCATTCAGGTGTCGTGCGGTTGT	4.38518
siR20986	AACCTACTGGCATACTTAGAACCC	69.389	siR440735	GTTCTAAGTATGCCAGTAGGTTTG	0.0859839
siR21763	AACGAACTTGAGGAATGCAGCGAA	37.145	siR291947	CGCTGCATTCCTCAAGTTCGTTAT	0.0859839
siR22114	AACGACAGCGGAGAGGTAGCAGTA	45.4855	siR325499	CTGCTACCTCTCCGCTGTCGTTGC	1.46173
siR22334	AACGACGGTGCGGAGAGGGCAGGA	10.92	siR325046	CTGCCCTCTCCGCACCGTCGTTGC	0.429919
siR22599	AACGAGTAGAATGAGAGGTGGAGT	11.0059	siR487598	TCCACCTCTCATTCTACTCGTTGT	0.171968
siR22612	AACGAGTCTTAGATGTAGCAATAA	15.821	siR198664	ATTGCTACATCTAAGACTCGTTGC	0.859839
siR22992	AACGATGGGCTGGGTAGAGGCA	15.3051	siR271164	CCTCTACCCAGCCCATCGTTGT	0.0859839
siR22999	AACGATGGTGCGGAGAGGGCAAGA	15.735	siR584934	TTGCCCTCTCCGCACCATCGTTGC	1.89165
siR23299	AACGCCATCGCCAGACAACACGCA	13.8434	siR305819	CGTGTTGTCTGGCGATGGCGTTTC	0.171968
siR23324	AACGCCGAGAACATGACCGCACAG	11.9518	siR433192	GTGCGGTCATGTTCTCGGCGTTGT	0.257952
siR24223	AACGTATCCTAGAACTCAAGAGGC	42.3041	siR321957	CTCTTGAGTTCTAGGATACGTTGT	9.88815
siR24268	AACGTCCAGATAACTCGCCGGCTG	12.7256	siR384718	GCCGGCGAGTTATCTGGACGTTGC	0.0859839
siR24367	AACGTGACGACGAGCAACCCACAA	61.2205	siR435478	GTGGGTTGCTCGTCGTCACGTTTA	0.773855
siR24571	AACGTTTGATGGGCAGAAGTAACT	33.3617	siR567292	TTACTTCTGCCCATCAAACGTTGC	0.171968
siR24695	AACTAAGTAGAAGAACAATGCGTA	10.834	siR288252	CGCATTGTTCTTCTACTTAGTTAT	0.0859839
siR24918	AACTACTGAACTGCTGAAGGTGGT	98.3656	siR221636	CACCTTCAGCAGTTCAGTAGTTCA	0.773855
siR25296	AACTCAAGTCTGACCGGGGAAGGC	39.7246	siR331765	CTTCCCCGGTCAGACTTGAGTTCG	0.0859839
siR25339	AACTCAGAGACGTACTTCACCTTC	10.49	siR138530	AGGTGAAGTACGTCTCTGAGTTTG	1.54771
siR25564	AACTCCTCTACATTGATCGTTGCC	41.9601	siR209186	CAACGATCAATGTAGAGGAGTTTG	0.0859839
siR25700	AACTCTAGACGATGGGGTGGGCTG	94.6683	siR382671	GCCCACCCCATCGTCTAGAGTTGC	0.171968
siR25930	AACTGAAGTGGTGAGCATGATGCG	11.2639	siR237620	CATCATGCTCACCACTTCAGTTTC	0.171968
siR26176	AACTGCATACACCTACCAAAACAC	20.7221	siR445681	GTTTTGGTAGGTGTATGCAGTTGG	0.773855
siR26420	AACTGGCTCTCTGTTGTCCTGCAT	20.8081	siR377639	GCAGGACAACAGAGAGCCAGTTAA	0.171968
siR26433	AACTGGGGACCATACTGCCGAGAG	10.49	siR319263	CTCGGCAGTATGGTCCCCAGTTTT	0.0859839
siR26486	AACTGTACTTATGCTGTTAGATGA	34.9095	siR174732	ATCTAACAGCATAAGTACAGTTAA	0.171968
siR26607	AACTGTGTCTGCGATGGGGAGAGG	65.9496	siR507425	TCTCCCCATCGCAGACACAGTTGT	0.171968
siR26758	AACTTAGGAAAAGATAGTTCGGGG	13.2415	siR259531	CCGAACTATCTTTTCCTAAGTTCA	0.0859839
siR27556	AACTTTTAGATTCCCAGCGTGACG	13.4995	siR480362	TCACGCTGGGAATCTAAAAGTTGC	0.171968
siR27725	AAGAAAAGGGCGGAGGCAGAAAAG	16.3369	siR597285	TTTCTGCCTCCGCCCTTTTCTTAC	0.0859839
siR27876	AAGAAATCAGAAAAGTGGAAATGG	13.6714	siR201238	ATTTCCACTTTTCTGATTTCTTGG	0.0859839
siR27946	AAGAACACATTCAAGATCGCCTCA	18.0566	siR133579	AGGCGATCTTGAATGTGTTCTTCT	0.0859839
siR28067	AAGAACTAAGAACTGATGAGCAGC	296.902	siR538924	TGCTCATCAGTTCTTAGTTCTTCT	0.257952
siR28708	AAGACATCCAAGCATACTCTCGAA	26.0531	siR282793	CGAGAGTATGCTTGGATGTCTTAT	0.0859839
siR28821	AAGACCGAGCTACACCAAAAGGAT	42.906	siR275186	CCTTTTGGTGTAGCTCGGTCTTTT	0.343936
siR29164	AAGACGATCCTAGCAGAGCTTCAT	301.288	siR343942	GAAGCTCTGCTAGGATCGTCTTTT	0.0859839
siR29412	AAGACTAATGGGAGGAAATGAGTG	12.9836	siR316179	CTCATTTCCTCCCATTAGTCTTCC	0.0859839
siR29488	AAGACTGAAAGTGGAAGGCTCATT	18.7445	siR525605	TGAGCCTTCCACTTTCAGTCTTCG	0.0859839
siR29636	AAGAGAAATGAATAAGATGGCTGA	61.2205	siR120485	AGCCATCTTATTCATTTCTCTTGG	0.429919
siR29847	AAGAGATTGTGTTGTTTGTTCTGT	15.821	siR101037	AGAACAAACAACACAATCTCTTGC	0.171968
siR29858	AAGAGCAAAAGATCCGAATTGAAC	12.8976	siR478805	TCAATTCGGATCTTTTGCTCTTAT	0.0859839
siR30528	AAGATCAAGACACATTAATTCGCT	16.165	siR277584	CGAATTAATGTGTCTTGATCTTGC	0.429919
siR30700	AAGATGAAGAACTACCCAAGCAGT	38.6068	siR541079	TGCTTGGGTAGTTCTTCATCTTGT	0.0859839
siR31012	AAGATTAACAAGACCGCAACAACC	26.741	siR592395	TTGTTGCGGTCTTGTTAATCTTCT	0.0859839
siR31050	AAGATTCAGCGTTGGGACCAATAA	122.785	siR199335	ATTGGTCCCAACGCTGAATCTTTC	0.171968
siR31123	AAGATTGTAGAGCCGGCCCTGCTT	34.1356	siR377850	GCAGGGCCGGCTCTACAATCTTGA	2.06361
siR31173	AAGATTTGTGCAGATACCATTACC	21.8399	siR452088	TAATGGTATCTGCACAAATCTTAC	0.343936
siR31207	AAGCAAAACTATCGGAACCAAGCA	288.648	siR335392	CTTGGTTCCGATAGTTTTGCTTGC	0.343936
siR31213	AAGCAAAATGAGTGGGGCCGATAG	13.8434	siR173944	ATCGGCCCCACTCATTTTGCTTCC	0.515903
siR31229	AAGCAAACCCGAGTAGAAATCAAC	11.1779	siR530051	TGATTTCTACTCGGGTTTGCTTCT	0.0859839
siR31296	AAGCAACGACAGCGGAGAGGTAGC	19.2604	siR457141	TACCTCTCCGCTGTCGTTGCTTCT	0.171968
siR31336	AAGCAACTCGACGATTCTTGATAT	77.7294	siR163736	ATCAAGAATCGTCGAGTTGCTTGC	0.171968
siR31358	AAGCAAGCATACTCTGAAGATTCA	49.5267	siR45858	AATCTTCAGAGTATGCTTGCTTCC	0.0859839
siR31424	AAGCAATGCAAGACCGTAGTTAGT	82.2866	siR448785	TAACTACGGTCTTGCATTGCTTAT	0.343936
siR31580	AAGCACTGAACCGTCCATTTCCAT	45.8294	siR398905	GGAAATGGACGGTTCAGTGCTTAG	4.21321
siR31632	AAGCAGATCTCCTAAGCCAGTATG	15.993	siR460456	TACTGGCTTAGGAGATCTGCTTAG	0.0859839
siR31740	AAGCAGTCACTCTCACAAGCTCTC	12.3817	siR360249	GAGCTTGTGAGAGTGACTGCTTGC	0.0859839
siR31769	AAGCAGTGATCTGGTGTAGTTGTC	77.6434	siR209824	CAACTACACCAGATCACTGCTTCT	0.171968
siR31785	AAGCAGTTGGAACTTGGAAGTAAA	143.851	siR460811	TACTTCCAAGTTCCAACTGCTTGT	0.0859839
siR31804	AAGCATACTCTGAAGATTCATTCT	18.1426	siR46326	AATGAATCTTCAGAGTATGCTTGC	7.30863
siR31831	AAGCATATCAGCCGTGGTAACTAA	12.1237	siR147830	AGTTACCACGGCTGATATGCTTAC	1.71968
siR31834	AAGCATATCAGTCGTGGTAACTAA	27.0849	siR147827	AGTTACCACGACTGATATGCTTAC	11.1779
siR31912	AAGCATCGTAGGCAGTCAGCAACA	32.072	siR586069	TTGCTGACTGCCTACGATGCTTAG	3.09542
siR31920	AAGCATCTCAGCAACATCGTCTAG	15.3051	siR106652	AGACGATGTTGCTGAGATGCTTTC	1.11779
siR31938	AAGCATGAGAAGAACAGTGTAACA	12.9836	siR566124	TTACACTGTTCTTCTCATGCTTGC	0.515903
siR32321	AAGCCCCACCCTACCGGACAGTGC	10.662	siR96099	ACTGTCCGGTAGGGTGGGGCTTGT	0.0859839
siR32441	AAGCCGACGGCGCACTGGAGGATG	20.0342	siR494708	TCCTCCAGTGCGCCGTCGGCTTCC	0.0859839
siR32569	AAGCCTAAGACTGCATAGCCACTT	35.5973	siR434904	GTGGCTATGCAGTCTTAGGCTTTC	0.0859839
siR32875	AAGCGATGGCACTCCGATTAGTAT	48.065	siR88892	ACTAATCGGAGTGCCATCGCTTGA	0.343936
siR33447	AAGCTCTAGTACCTCGTTCAGACC	34.6515	siR509930	TCTGAACGAGGTACTAGAGCTTGG	5.76092
siR33502	AAGCTGAAGCTGGACTTGTTGTCG	23.5596	siR53379	ACAACAAGTCCAGCTTCAGCTTCT	0.859839
siR33524	AAGCTGACTGACCGGTGGTGGGCT	68.2712	siR255892	CCCACCACCGGTCAGTCAGCTTGC	0.0859839
siR33533	AAGCTGAGCACGATGACGAATGAC	68.4432	siR244545	CATTCGTCATCGTGCTCAGCTTCC	0.0859839
siR33657	AAGCTGGGAGAAGTGCTCTTTCTG	25.1933	siR339479	GAAAGAGCACTTCTCCCAGCTTGC	0.171968
siR33691	AAGCTGTGAGACAGATGAGCATAG	10.748	siR185201	ATGCTCATCTGTCTCACAGCTTAG	0.171968
siR33696	AAGCTGTGCGGTCATGTTCTCGGC	26.0531	siR282313	CGAGAACATGACCGCACAGCTTCG	3.69731
siR33702	AAGCTGTGTGGCAACCTGGGTTGG	56.5774	siR19552	AACCCAGGTTGCCACACAGCTTAA	0.0859839
siR33728	AAGCTTACAACTGCTAACCGTCGA	138.692	siR354145	GACGGTTAGCAGTTGTAAGCTTCT	0.429919
siR33813	AAGCTTCTGAGAACATGTGTCTGC	26.913	siR104602	AGACACATGTTCTCAGAAGCTTCT	14.8752
siR33913	AAGCTTTGAGTTGTATACACCTGA	19.0884	siR139107	AGGTGTATACAACTCAAAGCTTCA	0.171968
siR33932	AAGCTTTTGCGGAACTTTACCTTC	54.5998	siR137227	AGGTAAAGTTCCGCAAAAGCTTGT	0.257952
siR33949	AAGGAAAAGACCGAGCTACACCAA	88.9073	siR416775	GGTGTAGCTCGGTCTTTTCCTTCT	0.0859839
siR33953	AAGGAAAAGACCGAGCTGCACTAG	23.4736	siR145859	AGTGCAGCTCGGTCTTTTCCTTCT	0.257952
siR33955	AAGGAAAATAGCATCGCACAATGT	10.2321	siR200033	ATTGTGCGATGCTATTTTCCTTCA	0.343936
siR33994	AAGGAAATGCGGTTGAGTACCTAC	19.3464	siR137436	AGGTACTCAACCGCATTTCCTTGT	0.343936
siR34059	AAGGAAGACGGCTCTAGCCCTGGT	26.9989	siR231881	CAGGGCTAGAGCCGTCTTCCTTGT	0.0859839
siR34116	AAGGAAGTCTAGAGCAGGGCCAGG	11.9518	siR546391	TGGCCCTGCTCTAGACTTCCTTTC	0.171968
siR34127	AAGGAATACATACTCTGCCGGTA	23.9895	siR264388	CCGGCAGAGTATGTATTCCTTAT	0.0859839
siR34128	AAGGAATACATACTCTGCCGGTAC	133.103	siR74244	ACCGGCAGAGTATGTATTCCTTAT	0.343936
siR34407	AAGGAGAGGAAGAACTGCCGGTGT	283.747	siR74265	ACCGGCAGTTCTTCCTCTCCTTGA	0.0859839
siR34411	AAGGAGATCAAGTTGAAGGAGGCG	50.2146	siR270659	CCTCCTTCAACTTGATCTCCTTGT	0.0859839
siR34434	AAGGAGCAGTTTGTTAGTAGCTTG	25.4512	siR124969	AGCTACTAACAAACTGCTCCTTGT	0.0859839
siR34536	AAGGAGTGTGAAGATTGCATTTGG	17.7987	siR13310	AAATGCAATCTTCACACTCCTTCA	0.0859839
siR34784	AAGGATTGGTCTTGAAGTCGCTTG	13.1555	siR123177	AGCGACTTCAAGACCAATCCTTAC	1.89165
siR34893	AAGGCACTCTGGAATTATTGCATT	18.4865	siR530894	TGCAATAATTCCAGAGTGCCTTGC	0.0859839
siR34935	AAGGCAGTGGATGTGATGCACAAG	15.821	siR559140	TGTGCATCACATCCACTGCCTTGC	0.0859839
siR35222	AAGGCGTGAGCAGAGGTGGACTTA	15.821	siR142985	AGTCCACCTCTGCTCACGCCTTTA	0.0859839
siR35249	AAGGCTAGTTGGTGATCAGTCGCG	25.1073	siR281759	CGACTGATCACCAACTAGCCTTCT	0.171968
siR35345	AAGGCTGTGTTCGTTGGAGAGGGT	47.807	siR271285	CCTCTCCAACGAACACAGCCTTAG	0.0859839
siR35434	AAGGGACATGTAGTCGGAATCGGG	20.7221	siR286690	CGATTCCGACTACATGTCCCTTCT	0.0859839
siR35782	AAGGGTAGGGGAGGACGCATCTGG	28.8906	siR114391	AGATGCGTCCTCCCCTACCCTTCC	0.0859839
siR35920	AAGGTACTGGTATGGATAGATGGC	17.1108	siR239869	CATCTATCCATACCAGTACCTTGG	0.171968
siR36032	AAGGTCACTTTGACTCAAATCGTT	29.6644	siR287035	CGATTTGAGTCAAAGTGACCTTAA	0.171968
siR36070	AAGGTCCGTGAGAAGGTATTAACA	22.1838	siR565524	TTAATACCTTCTCACGGACCTTCC	2.92345
siR36103	AAGGTCGACTGCATCCCAAAGTAC	192.948	siR99327	ACTTTGGGATGCAGTCGACCTTGT	7.56658
siR36149	AAGGTGAAGAACAACGAGTGCACC	10.576	siR531672	TGCACTCGTTGTTCTTCACCTTAT	0.0859839
siR36405	AAGTAAAAGATGTCATGAGCTTGC	25.4512	siR33343	AAGCTCATGACATCTTTTACTTTT	0.687871
siR36575	AAGTACATGCTCGACCGCCTTGGA	12.1237	siR212935	CAAGGCGGTCGAGCATGTACTTAA	3.35337
siR36700	AAGTAGAAGTGCTCTAGAATCCGT	18.5725	siR404065	GGATTCTAGAGCACTTCTACTTAC	0.0859839
siR36838	AAGTAGGCAGGGCAAGTGGCTGAC	11.1779	siR229022	CAGCCACTTGCCCTGCCTACTTAG	0.0859839
siR36920	AAGTATACTCTTGATCTCACGTGC	83.5763	siR87583	ACGTGAGATCAAGAGTATACTTAG	0.171968
siR36921	AAGTATACTCTTGATTTTCCGTGC	44.5396	siR84016	ACGGAAAATCAAGAGTATACTTGG	0.0859839
siR37062	AAGTATGTAGATGTGTCTTGATCA	18.8305	siR163742	ATCAAGACACATCTACATACTTAA	0.0859839
siR37453	AAGTCCCCCTACCTCGTTGGATCA	26.2251	siR167576	ATCCAACGAGGTAGGGGGACTTAA	0.0859839
siR37906	AAGTGAATTCTGGTATACGTGAGA	26.9989	siR480459	TCACGTATACCAGAATTCACTTGA	0.0859839
siR38371	AAGTGTAGAGGATAAACATGTATG	67.6693	siR455035	TACATGTTTATCCTCTACACTTCC	0.687871
siR38396	AAGTGTAGTCTCCTAGCAACGGGT	59.9308	siR267908	CCGTTGCTAGGAGACTACACTTTC	0.0859839
siR38611	AAGTTAGAGGACTCAGGCTTATAC	12.3817	siR151998	ATAAGCCTGAGTCCTCTAACTTCG	0.343936
siR38777	AAGTTCTGGAACATAGCAACTGCA	32.158	siR233958	CAGTTGCTATGTTCCAGAACTTCT	0.0859839
siR38830	AAGTTGAGATGGAGATGGATCGGA	12.0377	siR285380	CGATCCATCTCCATCTCAACTTTG	0.257952
siR39169	AAGTTTTGGAATGACGGACAATGG	22.4418	siR199819	ATTGTCCGTCATTCCAAAACTTGA	0.0859839
siR40319	AATACCCGACTGCGCTAAGACTGC	219.775	siR144610	AGTCTTAGCGCAGTCGGGTATTGG	15.993
siR40414	AATACCGGGTATTGAATCTTCGTA	57.2653	siR276828	CGAAGATTCAATACCCGGTATTTA	0.0859839
siR40494	AATACGAACCGCTCTAGACTGTAA	13.8434	siR61479	ACAGTCTAGAGCGGTTCGTATTTC	1.97763
siR40529	AATACGATTTAGGGGGAAAGCATA	27.6868	siR541269	TGCTTTCCCCCTAAATCGTATTGA	0.257952
siR40826	AATAGACAAAAGGCTTATGCATCA	15.0472	siR183567	ATGCATAAGCCTTTTGTCTATTCA	0.0859839
siR40922	AATAGATCTGATTTCCACGGCTGC	24.4194	siR121900	AGCCGTGGAAATCAGATCTATTCA	0.0859839
siR41200	AATAGGAAAATAGCTGCAGCCTAC	13.7574	siR134227	AGGCTGCAGCTATTTTCCTATTGG	0.257952
siR41306	AATAGGTGGAGGATAACTAGTGCA	49.3547	siR224083	CACTAGTTATCCTCCACCTATTAG	0.171968
siR41438	AATAGTCTAGAACACTGCAGGTGC	103.439	siR77659	ACCTGCAGTGTTCTAGACTATTAG	0.859839
siR41770	AATATCACACGTTGGTCAGTTTGG	10.2321	siR7036	AAACTGACCAACGTGTGATATTTT	0.171968
siR42020	AATATGCAGAAGTTGTGAAAAGTG	16.079	siR337601	CTTTTCACAACTTCTGCATATTGG	0.257952
siR42104	AATATGGATTCGTGTTGGGCCTTC	77.8154	siR133006	AGGCCCAACACGAATCCATATTGT	0.429919
siR42485	AATATTTTTTGCCGGACACATAAG	58.9849	siR474047	TATGTGTCCGGCAAAAAATATTGG	0.171968
siR42664	AATCAACTAGTAGACAAACATGCA	17.5407	siR243792	CATGTTTGTCTACTAGTTGATTGT	0.515903
siR42965	AATCACGGCTGTTGATCGTTGATG	25.4512	siR477236	TCAACGATCAACAGCCGTGATTAA	0.171968
siR43127	AATCAGCCGGCTACGTTGGATATA	12.5536	siR470930	TATCCAACGTAGCCGGCTGATTCT	0.687871
siR43157	AATCAGGAAGGTGGCAATGATGAT	18.5725	siR237703	CATCATTGCCACCTTCCTGATTAT	0.0859839
siR43273	AATCATACTACCTGCAAGAGCTGC	32.7599	siR126110	AGCTCTTGCAGGTAGTATGATTAG	1.11779
siR43861	AATCCCCAGCACAAGACGTAGATG	25.7952	siR504633	TCTACGTCTTGTGCTGGGGATTGC	0.343936
siR44308	AATCCTCAGCATGAGACGTAGATG	10.834	siR504629	TCTACGTCTCATGCTGAGGATTGC	1.54771
siR44486	AATCCTTAGCACGAGACGTAGATG	15.907	siR504630	TCTACGTCTCGTGCTAAGGATTGC	0.0859839
siR44671	AATCGACTGTTTATCCATACCTAT	12.0377	siR137787	AGGTATGGATAAACAGTCGATTTG	0.343936
siR44783	AATCGCGACGTAATAGGCCCATAT	11.8658	siR187431	ATGGGCCTATTACGTCGCGATTCG	3.26739
siR44845	AATCGGCCATAGCAGAGTACAATG	20.7221	siR589687	TTGTACTCTGCTATGGCCGATTGA	2.75148
siR45104	AATCTACTACAGCATCTTAGGCGG	10.834	siR385386	GCCTAAGATGCTGTAGTAGATTAG	3.69731
siR45298	AATCTCAGAACTTCGAAGACGATG	78.9332	siR502731	TCGTCTTCGAAGTTCTGAGATTAG	0.0859839
siR45582	AATCTGATCATGAAAGCTGGAAGA	197.247	siR573696	TTCCAGCTTTCATGATCAGATTGT	0.0859839
siR46078	AATCTTTGATGTTTGGTTGGTTGC	17.1108	siR18504	AACCAACCAAACATCAAAGATTGA	0.687871
siR46347	AATGAATTGAAGGATGGTGATCGA	11.4359	siR366138	GATCACCATCCTTCAATTCATTCC	0.0859839
siR46355	AATGACAACAAAGGATATGACTGA	185.639	siR142734	AGTCATATCCTTTGTTGTCATTCT	0.0859839
siR46482	AATGACGAATTAGCACCAGACAAC	56.2335	siR557892	TGTCTGGTGCTAATTCGTCATTCA	0.0859839
siR46483	AATGACGACAAAGGATATGGCTAA	98.0216	siR120360	AGCCATATCCTTTGTCGTCATTCT	0.171968
siR46554	AATGACTCCAGCAGGACTGCCATG	35.5113	siR545819	TGGCAGTCCTGCTGGAGTCATTGG	0.0859839
siR47071	AATGCAGAACAGGGAACAGTAATG	82.6305	siR567249	TTACTGTTCCCTGTTCTGCATTCC	0.257952
siR47085	AATGCAGCAGGACAGTGTCGTAGT	10.662	siR457657	TACGACACTGTCCTGCTGCATTAA	9.63019
siR47505	AATGCGAGAGAGAAGACTAGTAGA	33.3617	siR459434	TACTAGTCTTCTCTCTCGCATTCC	0.0859839
siR47560	AATGCGTCGTGAACCAACAGAGAG	10.748	siR321599	CTCTGTTGGTTCACGACGCATTGC	0.601887
siR48011	AATGGATAGAAGAGGAGGATGCGT	24.8493	siR379349	GCATCCTCCTCTTCTATCCATTGT	0.0859839
siR48307	AATGGTAGGCTGTGGGTGTAAGGT	30.1803	siR329801	CTTACACCCACAGCCTACCATTAA	0.0859839
siR48376	AATGGTCTGATACTAACCGGAGTG	17.6267	siR317492	CTCCGGTTAGTATCAGACCATTCC	0.0859839
siR48386	AATGGTGAAGACGAAGAGGGATAT	37.7469	siR169531	ATCCCTCTTCGTCTTCACCATTTG	0.0859839
siR48620	AATGTAGGTTTTAGAGGGGGTATA	16.8528	siR456029	TACCCCCTCTAAAACCTACATTGT	0.0859839
siR48641	AATGTAGTTGTGGTGGTGTAATGT	11.9518	siR192510	ATTACACCACCACAACTACATTAG	0.0859839
siR48786	AATGTCAGGGAAGGGGTAAGATTG	46.3453	siR178384	ATCTTACCCCTTCCCTGACATTGA	0.429919
siR48909	AATGTCGGACTGTTCAGTGTCATC	14.8752	siR521143	TGACACTGAACAGTCCGACATTGA	6.62076
siR48974	AATGTCTGAAGTCTGAACCAGAGG	89.2513	siR512153	TCTGGTTCAGACTTCAGACATTGA	0.343936
siR49637	AATTAATGCAGCAGGACAGTGTCG	11.3499	siR59294	ACACTGTCCTGCTGCATTAATTTG	0.171968
siR49737	AATTACCAAGTAGATGACTGTGAA	363.368	siR218188	CACAGTCATCTACTTGGTAATTAG	0.0859839
siR49968	AATTAGTGGTCGAAATTGGGTTTA	14.7032	siR19491	AACCCAATTTCGACCACTAATTAC	0.0859839
siR50231	AATTCAGAAGTGAGAGCAAATGGA	33.8776	siR245813	CATTTGCTCTCACTTCTGAATTAA	0.257952
siR50328	AATTCATTGCTCTGAGGACAATCT	10.834	siR199828	ATTGTCCTCAGAGCAATGAATTAG	0.0859839
siR50569	AATTCGGTTTGTCAGACGGATGGA	192.346	siR238503	CATCCGTCTGACAAACCGAATTAG	0.0859839
siR50837	AATTGAACACAATCGTCATGCATG	23.9895	siR533313	TGCATGACGATTGTGTTCAATTAT	0.0859839
siR50985	AATTGATGGAAGGAAAATAGCATG	28.6326	siR538776	TGCTATTTTCCTTCCATCAATTGC	0.0859839
siR51329	AATTGGTTTTGATTGGGTAGCTAG	16.9388	siR124895	AGCTACCCAATCAAAACCAATTAA	0.171968
siR51507	AATTGTTACAGGGAGGCTAGAGCA	120.463	siR320230	CTCTAGCCTCCCTGTAACAATTGT	0.0859839
siR52185	AATTTTCATCTGTCGTCATCATTC	13.0695	siR182486	ATGATGACGACAGATGAAAATTTT	0.0859839
siR52730	ACAAACCGAGTCTGGACAGTGGCA	86.5858	siR250926	CCACTGTCCAGACTCGGTTTGTTA	0.171968
siR52752	ACAAACGAGCAGAAACAACGAGTA	17.9706	siR319909	CTCGTTGTTTCTGCTCGTTTGTAT	0.171968
siR52788	ACAAACGGGACATGGGGGCGGTGG	10.662	siR73497	ACCGCCCCCATGTCCCGTTTGTGC	0.0859839
siR53233	ACAAATGGAAAGGAGGGAGCCGGT	16.251	siR296931	CGGCTCCCTCCTTTCCATTTGTGC	0.0859839
siR53415	ACAACACACGGCACCTGAATGACG	29.4925	siR485824	TCATTCAGGTGCCGTGTGTTGTTA	0.429919
siR53509	ACAACAGATCGGCATACCTCGCAA	37.489	siR387600	GCGAGGTATGCCGATCTGTTGTCA	0.343936
siR53523	ACAACAGGAAAGAGCGACGGTATC	112.123	siR456779	TACCGTCGCTCTTTCCTGTTGTGA	0.0859839
siR53965	ACAACGAGTAGAATGAGAGGTGGA	231.727	siR221404	CACCTCTCATTCTACTCGTTGTTT	0.0859839
siR54008	ACAACGCCGAGAACATGACCGCAC	77.4715	siR389937	GCGGTCATGTTCTCGGCGTTGTTG	1.46173
siR54259	ACAACTGCTAACCGTCGACCACAT	52.9661	siR435742	GTGGTCGACGGTTAGCAGTTGTAA	2.92345
siR54469	ACAAGACGACACGGTGAAAGGCAG	13.9294	siR386643	GCCTTTCACCGTGTCGTCTTGTCC	1.37574
siR54540	ACAAGAGCGTAGTGGGTGAGCATG	56.3194	siR538840	TGCTCACCCACTACGCTCTTGTTT	0.0859839
siR54623	ACAAGATGGGAGACAAGTATCTAA	15.4771	siR112265	AGATACTTGTCTCCCATCTTGTTG	0.0859839
siR54957	ACAAGGTCGACTGCATCCCAAAGT	104.728	siR600054	TTTGGGATGCAGTCGACCTTGTAA	0.945823
siR55965	ACAATTGTTACAGGGAGGCTAGAG	22.0979	siR311896	CTAGCCTCCCTGTAACAATTGTAG	0.0859839
siR55991	ACAATTTGGTTGTGTGGTAACTGT	23.4736	siR147825	AGTTACCACACAACCAAATTGTAC	0.0859839
siR55997	ACAATTTTACACCGAGTGGGACTG	17.1968	siR426258	GTCCCACTCGGTGTAAAATTGTTA	0.0859839
siR56040	ACACAAACGATAGAGAGATGACGG	38.5208	siR425433	GTCATCTCTCTATCGTTTGTGTTA	0.0859839
siR56683	ACACACTACCAGGATACTCGCAGA	16.7669	siR536739	TGCGAGTATCCTGGTAGTGTGTAA	0.171968
siR57523	ACACCAGAACGATGGGACGGATGA	12.7256	siR170676	ATCCGTCCCATCGTTCTGGTGTAC	0.0859839
siR57860	ACACCGGATCGAGAAGAAGGGCG	11.4359	siR259055	CCCTTCTTCTCGATCCGGTGTGC	0.171968
siR57861	ACACCGGATCGAGAAGAAGGGCGA	114.015	siR383369	GCCCTTCTTCTCGATCCGGTGTGC	0.257952
siR58098	ACACCTTAGGCTCCCATCAGATGG	12.8116	siR177385	ATCTGATGGGAGCCTAAGGTGTTG	7.39461
siR58251	ACACGAGAGGCGAAAGAAGTAGGC	16.079	siR310943	CTACTTCTTTCGCCTCTCGTGTGC	0.171968
siR58732	ACACGTGTGGAGAGAAGGTGCCTA	11.0059	siR404716	GGCACCTTCTCTCCACACGTGTGT	0.0859839
siR58765	ACACGTTGGTCAGTTTGGTAAAGT	10.49	siR593391	TTTACCAAACTGACCAACGTGTGA	0.343936
siR58871	ACACTACTCAACTGCATACATCTG	10.0601	siR370609	GATGTATGCAGTTGAGTAGTGTTT	0.429919
siR59117	ACACTGAACAGTCCGACATTGAAG	47.2911	siR478728	TCAATGTCGGACTGTTCAGTGTCA	0.0859839
siR59657	ACAGAACCTTCCAACCAGACCTGC	43.5938	siR138430	AGGTCTGGTTGGAAGGTTCTGTTT	0.0859839
siR59665	ACAGAACTACAGAAGCAAGGATAG	36.4572	siR172351	ATCCTTGCTTCTGTAGTTCTGTCT	0.171968
siR59680	ACAGAAGAGTGAGGGCTAAGATGA	16.5949	siR178454	ATCTTAGCCCTCACTCTTCTGTCT	0.0859839
siR59730	ACAGAATGGTAGAAGGAGAGTAGG	19.0884	siR460068	TACTCTCCTTCTACCATTCTGTAT	0.0859839
siR60180	ACAGATCTATCATGAGGACAGAGG	11.6938	siR512585	TCTGTCCTCATGATAGATCTGTCA	0.0859839
siR60212	ACAGATGACTAGTACTACAAATGA	22.3558	siR202510	ATTTGTAGTACTAGTCATCTGTCA	0.429919
siR60367	ACAGCAGAAATTTAGGAATGTAGA	12.2957	siR455087	TACATTCCTAAATTTCTGCTGTTG	0.257952
siR60404	ACAGCATCGTCACCGCTTACGGCC	39.1227	siR266286	CCGTAAGCGGTGACGATGCTGTGT	4.29919
siR60681	ACAGCTCGGTAACTACATGTTCAA	28.6326	siR340852	GAACATGTAGTTACCGAGCTGTTT	0.343936
siR60810	ACAGGAACATGAGAGGAGGCAGCC	34.6515	siR325166	CTGCCTCCTCTCATGTTCCTGTTC	0.0859839
siR60813	ACAGGAACTGCATGCATTGGAACT	17.0248	siR573373	TTCCAATGCATGCAGTTCCTGTCC	0.0859839
siR60820	ACAGGAAGTAGCATGAGTAGAGTC	29.0626	siR320149	CTCTACTCATGCTACTTCCTGTTC	0.171968
siR60886	ACAGGAGGGTAGGCATTGTGTAGC	47.807	siR453467	TACACAATGCCTACCCTCCTGTTA	0.171968
siR60888	ACAGGAGGTAGGCAAAGTTGGTAA	172.054	siR66536	ACCAACTTTGCCTACCTCCTGTTT	0.257952
siR60951	ACAGGCATAGTAGAAAAAACCGGA	155.717	siR300920	CGGTTTTTTCTACTATGCCTGTAG	0.0859839
siR60960	ACAGGCATGAGGAGGTAGGTAGGG	33.9636	siR309697	CTACCTACCTCCTCATGCCTGTTG	0.257952
siR60965	ACAGGCATGTACACATCCCCACTT	14.4453	siR435282	GTGGGGATGTGTACATGCCTGTGC	0.0859839
siR61133	ACAGGGTGTTTGACGAAATGCTGA	11.8658	siR119497	AGCATTTCGTCAAACACCCTGTGT	0.343936
siR61410	ACAGTCAGGAGGATCACAATGTTT	20.0342	siR65549	ACATTGTGATCCTCCTGACTGTAT	2.23558
siR61463	ACAGTCGAAGAGGAAACGTGAAGG	45.2275	siR571679	TTCACGTTTCCTCTTCGACTGTTG	0.0859839
siR61540	ACAGTGAGTGGGGGCAAATGCGGA	14.1014	siR288261	CGCATTTGCCCCCACTCACTGTAA	0.429919
siR61674	ACAGTTGATTTGCGCGGACCATGG	73.7742	siR188047	ATGGTCCGCGCAAATCAACTGTCG	0.429919
siR62285	ACATAGACTTCAGCACGACACTAC	33.7917	siR147314	AGTGTCGTGCTGAAGTCTATGTTT	0.171968
siR62327	ACATAGCTTATGTAGGTAGTAGGG	23.1297	siR310364	CTACTACCTACATAAGCTATGTAA	0.0859839
siR62672	ACATATTTTGTATTGGTCTGTCA	10.3181	siR59806	ACAGACCAATACAAAATATGTTA	0.171968
siR62837	ACATCAGATTTGTGAAGCCGTCAG	16.3369	siR353605	GACGGCTTCACAAATCTGATGTCC	1.46173
siR63430	ACATCGACGTTGCATACCTCTTAA	12.4677	siR30120	AAGAGGTATGCAACGTCGATGTGT	1.97763
siR63563	ACATCTAGACGCAATGGGAGGACG	14.9612	siR494750	TCCTCCCATTGCGTCTAGATGTCG	0.0859839
siR63914	ACATGACATAGTAAGACAAAAGGT	36.5431	siR337935	CTTTTGTCTTACTATGTCATGTAC	0.0859839
siR63930	ACATGACCACTCGACAGAAGAGCA	13.9294	siR321913	CTCTTCTGTCGAGTGGTCATGTGT	1.20377
siR64073	ACATGATTTATTGATTAGGACTAA	28.2887	siR143508	AGTCCTAATCAATAAATCATGTTT	0.0859839
siR64412	ACATGCTAGATTGAACTGTGGTAT	10.2321	siR67169	ACCACAGTTCAATCTAGCATGTAT	0.0859839
siR64508	ACATGGAAGCAAGCATACTCTGAA	36.0272	siR227496	CAGAGTATGCTTGCTTCCATGTGC	0.171968
siR64674	ACATGTAACAAAGATAGCAGGACG	171.968	siR495835	TCCTGCTATCTTTGTTACATGTAT	0.0859839
siR64895	ACATGTGTAGAGGTCAGGTAATGC	15.5631	siR192756	ATTACCTGACCTCTACACATGTCG	0.429919
siR64929	ACATGTTCGAAGGTGGGCCATGGG	11.5218	siR242621	CATGGCCCACCTTCGAACATGTAG	0.0859839
siR64955	ACATGTTGTTGGTGGCTTGTTGGT	18.0566	siR207307	CAACAAGCCACCAACAACATGTTA	0.257952
siR65212	ACATTCAGACCCTACAATCACTAA	10.1461	siR145750	AGTGATTGTAGGGTCTGAATGTAG	1.89165
siR65399	ACATTGACGAGTACAAAAGACATA	10.404	siR558180	TGTCTTTTGTACTCGTCAATGTGC	0.0859839
siR66080	ACCAAATTAAGAAACGTTGTCGGG	50.9025	siR277923	CGACAACGTTTCTTAATTTGGTGC	0.0859839
siR66688	ACCAAGGAGCTAGAGCGACAGCGG	86.6718	siR396266	GCTGTCGCTCTAGCTCCTTGGTTT	0.515903
siR67547	ACCACGACCTGTTCAAGAACGGCT	47.1192	siR267834	CCGTTCTTGAACAGGTCGTGGTAC	1.54771
siR67550	ACCACGACTGATATGCTTACCGAC	12.4677	siR298719	CGGTAAGCATATCAGTCGTGGTAA	1.37574
siR67554	ACCACGAGATGCTCTAGGAATCAC	15.735	siR371770	GATTCCTAGAGCATCTCGTGGTGA	0.171968
siR67836	ACCACTGCTAGACTACAAGACGAG	67.0674	siR304083	CGTCTTGTAGTCTAGCAGTGGTCA	2.32156
siR68368	ACCAGGAGACTAACAACATCAGCG	20.5501	siR324144	CTGATGTTGTTAGTCTCCTGGTAG	0.0859839
siR68383	ACCAGGATACTCGCAGATCGGACA	81.0828	siR491912	TCCGATCTGCGAGTATCCTGGTAG	0.257952
siR68616	ACCAGTGGGATTGCAACAATCGGA	14.6173	siR286950	CGATTGTTGCAATCCCACTGGTGA	0.773855
siR69269	ACCATGACGGTAAGTGGGGATGTG	12.1237	siR238165	CATCCCCACTTACCGTCATGGTAA	0.257952
siR69394	ACCATGGCGCTAGAGGAGGATGAG	87.7895	siR238678	CATCCTCCTCTAGCGCCATGGTAA	0.343936
siR69730	ACCCAAACACAAGCACACGGACTA	27.6008	siR426992	GTCCGTGTGCTTGTGTTTGGGTAG	0.0859839
siR69873	ACCCAAGTGACTACAGAAGATATA	13.0695	siR472278	TATCTTCTGTAGTCACTTGGGTTA	0.859839
siR69930	ACCCACAACGGCAAGCTGACTGAC	23.0437	siR232922	CAGTCAGCTTGCCGTTGTGGGTGA	0.0859839
siR70099	ACCCACTTGTTTTGAACCGTCGGA	54.4278	siR280886	CGACGGTTCAAAACAAGTGGGTAG	0.687871
siR70964	ACCCGACTGCGCTAAGACTGCCTA	118.142	siR405083	GGCAGTCTTAGCGCAGTCGGGTAT	3.26739
siR71710	ACCCTGAAGCACACATGTAGATGA	32.9318	siR174961	ATCTACATGTGTGCTTCAGGGTTG	0.429919
siR72348	ACCGACAAGAAGACACATGATGGT	26.9989	siR237653	CATCATGTGTCTTCTTGTCGGTTT	0.0859839
siR72555	ACCGACCTTATGGAGATTTGTCTT	12.3817	siR347265	GACAAATCTCCATAAGGTCGGTAA	4.21321
siR72722	ACCGACTAGGGCTCAGGCTAGAAG	11.1779	siR505294	TCTAGCCTGAGCCCTAGTCGGTCG	0.945823
siR73163	ACCGATCGGCTGTTCGTCGTCATG	10.49	siR522548	TGACGACGAACAGCCGATCGGTGG	7.30863
siR73357	ACCGCACGACACCTGAATGACGAA	79.7071	siR302382	CGTCATTCAGGTGTCGTGCGGTTG	1.37574
siR73815	ACCGCTGCCAGACTACAAGACGAG	22.3558	siR304087	CGTCTTGTAGTCTGGCAGCGGTAG	3.69731
siR75429	ACCGTCGGATCACCAGTCAAGCAG	58.641	siR397596	GCTTGACTGGTGATCCGACGGTTC	23.1297
siR75558	ACCGTGCACATGGGAAGGAAGACG	36.1992	siR514546	TCTTCCTTCCCATGTGCACGGTCC	0.0859839
siR76045	ACCTAAGTCGACGCAAAGGGCATA	24.8493	siR535166	TGCCCTTTGCGTCGACTTAGGTAC	0.687871
siR76119	ACCTACAGGACACAAGATTGGCTC	45.2275	siR381135	GCCAATCTTGTGTCCTGTAGGTAT	1.89165
siR77247	ACCTCTGACAGGGATGAACCAGGA	20.8941	siR327588	CTGGTTCATCCCTGTCAGAGGTAT	0.257952
siR77454	ACCTGAATGACGAATTAGCACCAG	35.6833	siR416045	GGTGCTAATTCGTCATTCAGGTGT	6.27682
siR77456	ACCTGAATGACGGATTAGTATTCC	19.1744	siR40612	AATACTAATCCGTCATTCAGGTGC	1.89165
siR77602	ACCTGCAAGAGATGTGTTTCTGAG	18.8305	siR225700	CAGAAACACATCTCTTGCAGGTAT	0.601887
siR77607	ACCTGCAAGATGAGATCGATCGAG	11.0919	siR285542	CGATCGATCTCATCTTGCAGGTAA	0.171968
siR78384	ACCTTCCCCGTCGACCGTCGTGCA	61.0486	siR222152	CACGACGGTCGACGGGGAAGGTGC	3.43936
siR78678	ACCTTGTAGGACACAGGCAGATAA	15.5631	siR177580	ATCTGCCTGTGTCCTACAAGGTTT	0.171968
siR78794	ACCTTTGAACATGTAGTTACCGAG	24.0755	siR298705	CGGTAACTACATGTTCAAAGGTGG	0.343936
siR78932	ACGAAAACCTGGACCGGACGTTGA	39.8105	siR24281	AACGTCCGGTCCAGGTTTTCGTAC	0.0859839
siR79079	ACGAACACTCCGATCAATGAGCAA	12.5536	siR393249	GCTCATTGATCGGAGTGTTCGTCT	1.89165
siR79508	ACGAAGTTAGAGGACTCAGGCTTA	10.576	siR122420	AGCCTGAGTCCTCTAACTTCGTCT	0.171968
siR79748	ACGACAAAGCTCAAAGACGTGGAT	14.4453	siR250445	CCACGTCTTTGAGCTTTGTCGTGC	0.0859839
siR79817	ACGACAAGTTAGCAAAAGAAGCCA	11.0919	siR397518	GCTTCTTTTGCTAACTTGTCGTCC	2.57952
siR79883	ACGACACCTGAATGACGAATTAGC	32.8458	siR452434	TAATTCGTCATTCAGGTGTCGTGC	0.0859839
siR80400	ACGACGAGCAACCCAAAACCACGG	66.6375	siR436138	GTGGTTTTGGGTTGCTCGTCGTCG	0.773855
siR80618	ACGACGGAGGATGATGGCTGCAGC	55.7176	siR532133	TGCAGCCATCATCCTCCGTCGTCA	2.23558
siR80858	ACGACTCATGTCTGGATTGTGCAC	47.807	siR375061	GCACAATCCAGACATGAGTCGTAC	0.0859839
siR80862	ACGACTCCACAGACTACCAAGCAC	88.6494	siR397908	GCTTGGTAGTCTGTGGAGTCGTGC	0.859839
siR80947	ACGACTGGGGGCATGCATCTAAAC	23.0437	siR567723	TTAGATGCATGCCCCCAGTCGTTT	0.0859839
siR80987	ACGACTTCAGCAAAGGAACTGGTG	11.3499	siR252661	CCAGTTCCTTTGCTGAAGTCGTCT	2.6655
siR81059	ACGAGAAATCTGAGATGCAAGAAG	129.148	siR515632	TCTTGCATCTCAGATTTCTCGTAT	16.5949
siR81208	ACGAGAGGCGAAAGAAGTAGGCAG	53.8259	siR385531	GCCTACTTCTTTCGCCTCTCGTGT	0.0859839
siR81263	ACGAGATGGGAACTAATCGGCCGG	20.6361	siR406113	GGCCGATTAGTTCCCATCTCGTCA	0.171968
siR81275	ACGAGATTGGAGGTGGCTATAGAT	74.806	siR313180	CTATAGCCACCTCCAATCTCGTCG	0.171968
siR81278	ACGAGATTGGTAAAAAGACAGCTC	52.7081	siR396361	GCTGTCTTTTTACCAATCTCGTCG	1.63369
siR81280	ACGAGATTGTAGTAAATAGATGGA	411.261	siR239902	CATCTATTTACTACAATCTCGTGC	0.171968
siR81319	ACGAGCAGAAACAACGAGTAGAAT	12.4677	siR504746	TCTACTCGTTGTTTCTGCTCGTTT	0.0859839
siR81348	ACGAGCCCTGGAAGATCTGCTTAG	14.4453	siR31634	AAGCAGATCTTCCAGGGCTCGTGT	14.2733
siR81409	ACGAGCTAGGACGCCAGCTGCTGC	12.8116	siR118213	AGCAGCTGGCGTCCTAGCTCGTGG	0.0859839
siR81425	ACGAGCTCTGGCAGCGACGCAATT	43.6798	siR585546	TTGCGTCGCTGCCAGAGCTCGTCT	0.0859839
siR81485	ACGAGGAGTGCAACGCAACTAGGA	11.2639	siR312902	CTAGTTGCGTTGCACTCCTCGTAT	0.0859839
siR81738	ACGAGTTGTAGCTGGGTCGGTCGA	25.4512	siR349623	GACCGACCCAGCTACAACTCGTGT	0.601887
siR81865	ACGATATCAGAACCGTACTGCCTC	10.3181	siR405041	GGCAGTACGGTTCTGATATCGTGA	0.0859839
siR82408	ACGATGGAGGAGTGTAGTGATGGA	26.569	siR237005	CATCACTACACTCCTCCATCGTCT	0.343936
siR83140	ACGCCATCGCCAGACAACACGCAG	45.4855	siR390966	GCGTGTTGTCTGGCGATGGCGTTT	0.171968
siR83431	ACGCGACTGATCTGCCGAAGATGA	27.4289	siR178911	ATCTTCGGCAGATCAGTCGCGTGC	0.601887
siR83567	ACGCGTACCTTAATCTGAACCGGA	47.5491	siR300340	CGGTTCAGATTAAGGTACGCGTCC	0.343936
siR83722	ACGCTCACGAACAACCAATGACGG	26.741	siR425699	GTCATTGGTTGTTCGTGAGCGTCG	0.773855
siR83857	ACGCTGGGCTGCGGAGATGGCAGA	23.2156	siR534547	TGCCATCTCCGCAGCCCAGCGTTT	0.0859839
siR84062	ACGGAAATCGAACAAGGTGATTAG	17.6267	siR42925	AATCACCTTGTTCGATTTCCGTTT	0.601887
siR84269	ACGGACCTAGAGTGTAACAAGCAG	199.139	siR398072	GCTTGTTACACTCTAGGTCCGTCC	0.0859839
siR84442	ACGGACTAGCGGTTTACCCCCATT	78.5893	siR549410	TGGGGGTAAACCGCTAGTCCGTGT	0.515903
siR84560	ACGGAGCACCTAAATACAACTGAA	17.6267	siR234011	CAGTTGTATTTAGGTGCTCCGTGA	0.343936
siR84685	ACGGATCAGACAGAGGGTAGCCGA	25.4512	siR408083	GGCTACCCTCTGTCTGATCCGTCC	6.10486
siR84713	ACGGATCCGTGGCTTTACAGGAGG	12.8976	siR495983	TCCTGTAAAGCCACGGATCCGTTC	0.257952
siR84801	ACGGATTTAGCATACAAGCAATGG	27.2569	siR198825	ATTGCTTGTATGCTAAATCCGTCC	0.0859839
siR84856	ACGGCACCTGAATGACGGATTAGT	46.1733	siR451619	TAATCCGTCATTCAGGTGCCGTGT	0.0859839
siR85002	ACGGCCGAGGAGCATCAATAAGTT	12.5536	siR330632	CTTATTGATGCTCCTCGGCCGTGC	0.343936
siR85425	ACGGGAAGAAGAGGAACCTACCAG	11.6938	siR413766	GGTAGGTTCCTCTTCTTCCCGTTG	0.0859839
siR85654	ACGGGTATCTCTGTCGTCAAGCAA	17.0248	siR397576	GCTTGACGACAGAGATACCCGTGG	0.257952
siR85669	ACGGGTCATAGCTGGGACGGTTGA	27.5148	siR20776	AACCGTCCCAGCTATGACCCGTGT	0.0859839
siR85763	ACGGTACACCCCGTCGACGTCGCC	83.3184	siR281000	CGACGTCGACGGGGTGTACCGTGC	0.859839
siR86039	ACGGTCAGGCGAGGTGGAGACGCG	258.124	siR303697	CGTCTCCACCTCGCCTGACCGTCT	0.859839
siR86041	ACGGTCAGTTCAGAAGTCTCCGGT	12.2097	siR293787	CGGAGACTTCTGAACTGACCGTCA	0.945823
siR86095	ACGGTCGACGACGGTGGTAGGCAG	15.821	siR385452	GCCTACCACCGTCGTCGACCGTTG	0.0859839
siR86237	ACGGTGAGAAGGAAAGCTTGAGTA	11.0919	siR314911	CTCAAGCTTTCCTTCTCACCGTCG	0.171968
siR86303	ACGGTGGCTTGAGCGTACACGGTG	11.0059	siR267531	CCGTGTACGCTCAAGCCACCGTCG	0.171968
siR86388	ACGGTTCAAAACAAGTGGGTAGAT	38.4348	siR309518	CTACCCACTTGTTTTGAACCGTCG	1.37574
siR86457	ACGGTTGTAGCATGGGGTGGATAT	10.834	siR167980	ATCCACCCCATGCTACAACCGTGA	1.54771
siR86654	ACGTACGACAACACTAGTAGCTGA	16.3369	siR124987	AGCTACTAGTGTTGTCGTACGTAC	11.9518
siR86751	ACGTAGATGAGGCGGAGAACAGAG	25.0213	siR329170	CTGTTCTCCGCCTCATCTACGTCC	0.0859839
siR86841	ACGTATCCTAGAACTCAAGAGGCT	22.0119	siR271831	CCTCTTGAGTTCTAGGATACGTTG	0.257952
siR86993	ACGTCAGTACATGCCGTGGGACGG	19.0884	siR426254	GTCCCACGGCATGTACTGACGTCT	0.171968
siR87397	ACGTCTGCAAGAGCGAGCTAGAGA	10.404	siR505348	TCTAGCTCGCTCTTGCAGACGTAC	0.171968
siR87553	ACGTGACGACGAGCAACCCACAAC	18.4865	siR560064	TGTGGGTTGCTCGTCGTCACGTTT	0.0859839
siR87701	ACGTGCCTGCAAGAGAGAAGAGGA	24.1615	siR321889	CTCTTCTCTCTTGCAGGCACGTCC	0.171968
siR87711	ACGTGCGGATATGACGGTGATGAT	57.3512	siR236955	CATCACCGTCATATCCGCACGTGC	0.687871
siR87720	ACGTGCGTGTAGAGGGAGTTAGAG	21.496	siR307844	CTAACTCCCTCTACACGCACGTAT	0.515903
siR87774	ACGTGGAGCTTTGGTTCGTTGGAT	20.6361	siR247262	CCAACGAACCAAAGCTCCACGTCC	0.0859839
siR87867	ACGTGGTAGGTAACTGATGTTGGG	31.3841	siR207935	CAACATCAGTTACCTACCACGTAT	0.429919
siR88008	ACGTGTTGAGCTGGGGCGGCCTCG	13.0695	siR133222	AGGCCGCCCCAGCTCAACACGTAA	0.171968
siR88734	ACTAAGAAGACTCTACCGGTGACG	23.8175	siR479957	TCACCGGTAGAGTCTTCTTAGTCT	0.0859839
siR89269	ACTACATGTTCGAAGGTGGGCCAT	13.3275	siR405789	GGCCCACCTTCGAACATGTAGTTA	0.171968
siR89618	ACTACGACTCGGACCCTGGCGGCG	24.2475	siR262509	CCGCCAGGGTCCGAGTCGTAGTGA	0.0859839
siR89838	ACTACTGAACTGCTGAAGGTGGTG	33.1898	siR250080	CCACCTTCAGCAGTTCAGTAGTTC	0.687871
siR89981	ACTAGAAGAGCTGCAACAGATTGA	26.913	siR45759	AATCTGTTGCAGCTCTTCTAGTAG	0.0859839
siR90028	ACTAGACATTTTGGCGCTCGTTGT	82.8025	siR22541	AACGAGCGCCAAAATGTCTAGTGC	0.0859839
siR90263	ACTAGCGACGAATAGACATTGGGA	14.1014	siR248797	CCAATGTCTATTCGTCGCTAGTTA	0.601887
siR90604	ACTATAATAGCACCTTGGTCGTCA	15.2191	siR80078	ACGACCAAGGTGCTATTATAGTTA	0.0859839
siR90652	ACTATAGAGGCTCTTGACGTGGCA	30.2663	siR250402	CCACGTCAAGAGCCTCTATAGTAC	0.0859839
siR90674	ACTATAGCTGATAACGTCGACTCC	21.496	siR143818	AGTCGACGTTATCAGCTATAGTCA	0.257952
siR90680	ACTATAGGGGTTAGGCGATGGAGC	13.2415	siR488919	TCCATCGCCTAACCCCTATAGTTT	0.0859839
siR90849	ACTATCGGAACCAAGCAAGCCATT	34.5655	siR547761	TGGCTTGCTTGGTTCCGATAGTCC	0.343936
siR90966	ACTATGATGACCACAACACTCGGC	11.7798	siR284699	CGAGTGTTGTGGTCATCATAGTAG	0.0859839
siR90985	ACTATGCACATTGTTGATCTTCGA	10.576	siR343239	GAAGATCAACAATGTGCATAGTAA	0.687871
siR91390	ACTCAACTCAGCACCGACGAGCAC	96.6459	siR393887	GCTCGTCGGTGCTGAGTTGAGTCC	0.171968
siR91397	ACTCAACTCTGAAGACGTGCTCCC	419.085	siR358917	GAGCACGTCTTCAGAGTTGAGTCC	0.0859839
siR91657	ACTCAGCGCTCGGTATACTTTACA	89.5092	siR447087	TAAAGTATACCGAGCGCTGAGTGG	0.773855
siR92700	ACTCGACGAGATTGGAGGTGGCTA	307.564	siR381363	GCCACCTCCAATCTCGTCGAGTTT	0.343936
siR92716	ACTCGACGGGAGCAAGAGATTGTG	24.9353	siR215108	CAATCTCTTGCTCCCGTCGAGTGG	0.0859839
siR92793	ACTCGATTTCATGAAGACAAAGCG	116.422	siR337404	CTTTGTCTTCATGAAATCGAGTAC	0.0859839
siR92985	ACTCGTAGCTGTGACGCATGCTTT	20.3782	siR119205	AGCATGCGTCACAGCTACGAGTTC	0.171968
siR93089	ACTCGTTGTGCTGTATTTTTGGAG	27.1709	siR246178	CCAAAAATACAGCACAACGAGTTT	0.257952
siR93184	ACTCTAGACGATGGGGTGGGCTGG	39.2086	siR120678	AGCCCACCCCATCGTCTAGAGTTG	0.257952
siR93816	ACTCTTGGCATTGCAGATTTCATC	45.4855	siR517881	TGAAATCTGCAATGCCAAGAGTGA	0.171968
siR93820	ACTCTTGGGCTCGTTTCACGGTGG	16.8528	siR75511	ACCGTGAAACGAGCCCAAGAGTGC	0.0859839
siR93926	ACTGAACAGTCCGACATTGAAGCC	57.2653	siR330879	CTTCAATGTCGGACTGTTCAGTGT	0.343936
siR94021	ACTGAATCAGACAAGGAGAAGCCA	22.0979	siR397392	GCTTCTCCTTGTCTGATTCAGTAT	0.0859839
siR94052	ACTGACAAACATTGAAGGACACAT	10.1461	siR436935	GTGTCCTTCAATGTTTGTCAGTGC	0.0859839
siR94088	ACTGACAGATGACTAGTACTACAA	33.4477	siR422210	GTAGTACTAGTCATCTGTCAGTGG	0.429919
siR94118	ACTGACCAAGCAAAGCCCTGTACC	108.512	siR454323	TACAGGGCTTTGCTTGGTCAGTCG	0.515903
siR94151	ACTGACCGGTGGTGGGCTATGGTA	19.4324	siR253024	CCATAGCCCACCACCGGTCAGTCA	0.0859839
siR94565	ACTGATTTTGTATGTGGCTGAGGA	30.0084	siR315477	CTCAGCCACATACAAAATCAGTCA	0.257952
siR94652	ACTGCACCAACCGAACTGAAGATG	18.7445	siR514106	TCTTCAGTTCGGTTGGTGCAGTAG	0.171968
siR94815	ACTGCATTGAAAGAAACGATTTGA	11.8658	siR12717	AAATCGTTTCTTTCAATGCAGTTG	0.257952
siR95400	ACTGGAAGTGCGGAATCGAGATGG	374.374	siR176504	ATCTCGATTCCGCACTTCCAGTCC	0.257952
siR95548	ACTGGCATACTTAGAACCCGAAAG	15.3051	siR576952	TTCGGGTTCTAAGTATGCCAGTAG	0.171968
siR95624	ACTGGCTCTCTGTTGTCCTGCATG	17.1108	siR532329	TGCAGGACAACAGAGAGCCAGTTA	0.859839
siR95685	ACTGGGGGCATGCATCTAAACTCA	27.0849	siR149713	AGTTTAGATGCATGCCCCCAGTCG	0.0859839
siR95759	ACTGGTGGAACTTCTCTTGTGGCA	52.2782	siR249066	CCACAAGAGAAGTTCCACCAGTGC	0.171968
siR96104	ACTGTCCGTCTGTCAAGCAGCCTA	12.2957	siR408573	GGCTGCTTGACAGACGGACAGTGC	0.773855
siR96386	ACTGTTAGATGCGTGAGACCGTGA	10.0601	siR86148	ACGGTCTCACGCATCTAACAGTAA	1.28976
siR96617	ACTTAATAACACGGAATGTACGCA	49.0968	siR301152	CGTACATTCCGTGTTATTAAGTCC	0.0859839
siR96946	ACTTATATGGTTGTTGGAGAATGA	44.0237	siR196655	ATTCTCCAACAACCATATAAGTTT	0.171968
siR96962	ACTTATCATGCTACAGGACGAGAA	26.2251	siR319625	CTCGTCCTGTAGCATGATAAGTAT	1.89165
siR97099	ACTTCAAGTGGAGCGACGGTCGAG	26.1391	siR279118	CGACCGTCGCTCCACTTGAAGTGC	0.0859839
siR97182	ACTTCAGCAGACATCGGTAGGAGG	26.0531	siR494120	TCCTACCGATGTCTGCTGAAGTGG	0.0859839
siR97574	ACTTCGGGAGCGGTATGGAGTATG	26.483	siR459746	TACTCCATACCGCTCCCGAAGTAC	0.257952
siR97887	ACTTCTTAGTTCTGTGGGATGGTT	60.2747	siR253609	CCATCCCACAGAACTAAGAAGTAT	0.171968
siR98017	ACTTGACAGTTTGAGACTTGAGGC	17.1108	siR314940	CTCAAGTCTCAAACTGTCAAGTAT	0.0859839
siR98031	ACTTGACGAGGCGATACTTTCAGC	13.2415	siR517743	TGAAAGTATCGCCTCGTCAAGTTT	0.257952
siR98156	ACTTGCACAAAGACATCGCTCGGT	77.9874	siR283351	CGAGCGATGTCTTTGTGCAAGTGT	1.71968
siR98192	ACTTGCAGGATGATGTTGTTGGGC	43.2499	siR246865	CCAACAACATCATCCTGCAAGTCC	0.0859839
siR98194	ACTTGCAGGGCATGTAGCAATAAA	12.3817	siR475091	TATTGCTACATGCCCTGCAAGTGC	0.0859839
siR98555	ACTTGTAGACGACGCTTGTGTCCA	14.6173	siR347771	GACACAAGCGTCGTCTACAAGTAG	0.429919
siR98659	ACTTGTCGAACCGGCACATGTGTC	19.0024	siR218986	CACATGTGCCGGTTCGACAAGTAT	0.171968
siR98841	ACTTGTTTTGAACCGTCGGATCAC	22.2698	siR366713	GATCCGACGGTTCAAAACAAGTGG	0.257952
siR98993	ACTTTATTTGGGAATCGTTGCACA	98.5375	siR530529	TGCAACGATTCCCAAATAAAGTGC	0.515903
siR99218	ACTTTGAATAGGACGAATGATTAA	13.4135	siR43478	AATCATTCGTCCTATTCAAAGTTT	0.0859839
siR99332	ACTTTGGGTTCAAGAGCAATGGCA	14.9612	siR255147	CCATTGCTCTTGAACCCAAAGTAA	0.0859839
siR99386	ACTTTGTTTGTCGACTTAAGCGGT	126.138	siR292202	CGCTTAAGTCGACAAACAAAGTAA	0.343936
siR99738	AGAAAAACTGCAGCGGAAAACAAA	40.6704	siR564390	TGTTTTCCGCTGCAGTTTTTCTTT	0.0859839
siR99817	AGAAAACAAACACTACTGACCCTC	14.8752	siR412511	GGGTCAGTAGTGTTTGTTTTCTAG	0.0859839
siR100161	AGAAACAACGAGTAGAATGAGAGG	14.4453	siR506980	TCTCATTCTACTCGTTGTTTCTGC	0.429919
siR100481	AGAAAGACGCAACCGCACTCTAAT	10.1461	siR462611	TAGAGTGCGGTTGCGTCTTTCTGC	0.859839
siR100516	AGAAAGATATGACTGCATAGTATG	12.5536	siR459540	TACTATGCAGTCATATCTTTCTCT	0.0859839
siR100530	AGAAAGCACTAACAATTCTGGTCA	21.7539	siR68016	ACCAGAATTGTTAGTGCTTTCTAG	0.171968
siR100551	AGAAAGCCTAAGACTGCATAGCCA	255.63	siR392701	GCTATGCAGTCTTAGGCTTTCTTC	0.171968
siR100563	AGAAAGCGAGGCAGTACGGTTCTG	19.1744	siR341195	GAACCGTACTGCCTCGCTTTCTGA	0.0859839
siR100590	AGAAAGGAACCACCGATGACGACG	151.676	siR502214	TCGTCATCGGTGGTTCCTTTCTAT	0.0859839
siR100592	AGAAAGGAATGAATTGAAGGATGG	53.224	siR172194	ATCCTTCAATTCATTCCTTTCTCC	0.171968
siR100736	AGAAATAGATAGTCTCGGACATAA	11.6078	siR189618	ATGTCCGAGACTATCTATTTCTAA	0.257952
siR100973	AGAAATTAGAACAGCAGCCAATAA	27.6868	siR199173	ATTGGCTGCTGTTCTAATTTCTTT	0.0859839
siR101079	AGAACAAGAGAGAGCCAATTTGAG	17.9706	siR206981	CAAATTGGCTCTCTCTTGTTCTAA	0.0859839
siR101120	AGAACACATTCAAGATCGCCTCAC	38.6068	siR361647	GAGGCGATCTTGAATGTGTTCTTC	0.0859839
siR101139	AGAACACCTGATGCTGATAAGATG	35.0814	siR513708	TCTTATCAGCATCAGGTGTTCTTC	0.171968
siR101144	AGAACACGGCCTTTCATCCTCAGC	14.6173	siR526100	TGAGGATGAAAGGCCGTGTTCTGG	0.0859839
siR101152	AGAACACTGTAGGTGCCGCCAAGC	20.2062	siR587876	TTGGCGGCACCTACAGTGTTCTAG	0.0859839
siR101164	AGAACAGAGGTAGAGGTTGTTGGT	17.2828	siR207227	CAACAACCTCTACCTCTGTTCTGT	0.429919
siR101205	AGAACATACTCCATTGCAGCCTAC	12.9836	siR134222	AGGCTGCAATGGAGTATGTTCTTC	3.26739
siR101335	AGAACCCAACGAAATGATCGTCTT	52.7081	siR352075	GACGATCATTTCGTTGGGTTCTCA	0.429919
siR101343	AGAACCCACAACCAAAGACTTTCA	15.1332	siR10482	AAAGTCTTTGGTTGTGGGTTCTTG	0.343936
siR101376	AGAACCGAGAGAAATCAAGACTGA	13.3275	siR144808	AGTCTTGATTTCTCTCGGTTCTGA	0.515903
siR101435	AGAACCGTCGAACATATGGCGTCA	15.5631	siR83133	ACGCCATATGTTCGACGGTTCTAG	0.257952
siR101475	AGAACCTGGCAGCCGCATCTCCAA	10.834	siR401688	GGAGATGCGGCTGCCAGGTTCTAG	0.343936
siR101589	AGAACGGAGCCAGCGACCTTAGAC	11.0059	siR308163	CTAAGGTCGCTGGCTCCGTTCTGA	0.0859839
siR101609	AGAACGGGGTGGTAGTCAATGGCC	10.662	siR255082	CCATTGACTACCACCCCGTTCTGT	0.0859839
siR101648	AGAACTAAGAACTGATGAGCAGCA	61.7364	siR325625	CTGCTCATCAGTTCTTAGTTCTTC	0.171968
siR101655	AGAACTACACAAGATGAAGAACTA	26.2251	siR441091	GTTCTTCATCTTGTGTAGTTCTTC	0.0859839
siR101717	AGAACTCCACTGGCATGTTTAATG	14.6173	siR564654	TTAAACATGCCAGTGGAGTTCTAT	0.773855
siR101851	AGAACTTGAGTGCCTACATCATCC	40.5844	siR182655	ATGATGTAGGCACTCAAGTTCTTA	0.0859839
siR101924	AGAAGAACATTGGGCCGATCATAA	15.6491	siR182413	ATGATCGGCCCAATGTTCTTCTAT	0.171968
siR101970	AGAAGAAGGGCGAGTGACCAGCAG	22.0979	siR395926	GCTGGTCACTCGCCCTTCTTCTCG	0.0859839
siR102048	AGAAGACCCTACTCTGTGTTATCG	118.658	siR150992	ATAACACAGAGTAGGGTCTTCTAA	0.429919
siR102113	AGAAGACTCTACCGGTGACGCTGG	25.4512	siR124404	AGCGTCACCGGTAGAGTCTTCTTA	0.171968
siR102134	AGAAGAGAGCAGCGTCGGGGTAGA	10.0601	siR456038	TACCCCGACGCTGCTCTCTTCTTC	0.257952
siR102144	AGAAGAGATCATCAGTAGAAGTGT	27.3429	siR97670	ACTTCTACTGATGATCTCTTCTAC	0.0859839
siR102274	AGAAGATCAACTGCATTGAAAGAA	10.748	siR336426	CTTTCAATGCAGTTGATCTTCTAC	0.0859839
siR102325	AGAAGATGAAATCTGCAATGCC	11.6938	siR244986	CATTGCAGATTTCATCTTCTTG	0.0859839
siR102358	AGAAGATGGATGGGCCAAATGCTA	36.7151	siR380643	GCATTTGGCCCATCCATCTTCTCA	0.0859839
siR102375	AGAAGATTAACAAGACCGCAACAA	66.7235	siR442260	GTTGCGGTCTTGTTAATCTTCTTA	0.0859839
siR102429	AGAAGCACTAAGGCGGGTCTGTCG	25.1073	siR59822	ACAGACCCGCCTTAGTGCTTCTCG	0.687871
siR102457	AGAAGCAGTGATCTGGTGTAGTTG	65.3477	siR89117	ACTACACCAGATCACTGCTTCTCT	1.80566
siR102640	AGAAGCTGAAGCTGGACTTGTTGT	67.4114	siR15735	AACAAGTCCAGCTTCAGCTTCTAG	1.03181
siR102656	AGAAGCTGCCGACCTACAACAAGC	11.3499	siR592508	TTGTTGTAGGTCGGCAGCTTCTGA	0.429919
siR102698	AGAAGCTTCTTCAGTCGGGACTGT	16.7669	siR143158	AGTCCCGACTGAAGAAGCTTCTGA	0.601887
siR102716	AGAAGGAACAGAGCAGTGAAGTAG	18.8305	siR97154	ACTTCACTGCTCTGTTCCTTCTTC	0.0859839
siR102778	AGAAGGCACCTGTCAAATACTTGC	18.7445	siR37113	AAGTATTTGACAGGTGCCTTCTTT	0.945823
siR102829	AGAAGGCGTATCCGTATCTGTTCA	57.1793	siR16882	AACAGATACGGATACGCCTTCTCC	1.63369
siR102838	AGAAGGCTAGTTGGTGATCAGTCG	10.92	siR94410	ACTGATCACCAACTAGCCTTCTCG	0.257952
siR102869	AGAAGGGGAGTAGGCTGCAGCTAT	50.3006	siR126434	AGCTGCAGCCTACTCCCCTTCTCG	0.601887
siR102923	AGAAGGTGAAGTGGACATAATTTT	10.3181	siR50076	AATTATGTCCACTTCACCTTCTCG	0.0859839
siR103029	AGAAGTAGGCATATGGCAATCGAA	15.5631	siR286868	CGATTGCCATATGCCTACTTCTGA	0.0859839
siR103058	AGAAGTATTAGGAAACTTTGGCAT	30.8682	siR380780	GCCAAAGTTTCCTAATACTTCTCC	0.0859839
siR103207	AGAAGTGGCCACAGAACCTCATGC	32.8458	siR181995	ATGAGGTTCTGTGGCCACTTCTAG	0.257952
siR103439	AGAATACTGGAGACAATCATAACT	202.32	siR569890	TTATGATTGTCTCCAGTATTCTGT	0.343936
siR103446	AGAATAGAAAGGAACCACCGATGA	13.0695	siR174217	ATCGGTGGTTCCTTTCTATTCTGC	0.171968
siR103596	AGAATCAATTGGAGGAGGAAACAC	10.662	siR444337	GTTTCCTCCTCCAATTGATTCTAA	0.0859839
siR103703	AGAATCGAACTGTGCATCAACTAG	26.569	siR148922	AGTTGATGCACAGTTCGATTCTTA	0.0859839
siR103801	AGAATGACTAAACCAACCTAACGA	20.4642	siR439186	GTTAGGTTGGTTTAGTCATTCTTT	0.0859839
siR103827	AGAATGAGTAAGGGACAAATGGTA	63.2841	siR255345	CCATTTGTCCCTTACTCATTCTGA	0.257952
siR103948	AGAATGGATACAACTGGTAGCGGA	10.49	siR291299	CGCTACCAGTTGTATCCATTCTTC	0.773855
siR103983	AGAATGTACGCTGTGTTATTTGAT	18.3146	siR206251	CAAATAACACAGCGTACATTCTAC	0.0859839
siR104331	AGACAACAGAGATTTGGCCTGGTA	11.6938	siR252239	CCAGGCCAAATCTCTGTTGTCTAG	0.0859839
siR104530	AGACAATTGGGCTTGGCTACTTCC	65.1758	siR36779	AAGTAGCCAAGCCCAATTGTCTAT	0.0859839
siR104677	AGACACGATTAACGAGGATTGGTG	39.8965	siR248601	CCAATCCTCGTTAATCGTGTCTAC	0.257952
siR104984	AGACATCGGTAGGAGGGCAGCAGA	33.3617	siR539966	TGCTGCCCTCCTACCGATGTCTGC	0.171968
siR105029	AGACATGCTGACACGACTGGATGA	23.5596	siR168417	ATCCAGTCGTGTCAGCATGTCTTC	0.171968
siR105102	AGACATTTCAGAGAACAACGGAAG	268.27	siR493896	TCCGTTGTTCTCTGAAATGTCTAT	0.171968
siR105114	AGACCAAAACAACGAAGAGCAGGG	92.8626	siR325783	CTGCTCTTCGTTGTTTTGGTCTTT	0.0859839
siR105122	AGACCAAAGCTCAAGCGACTTCAA	65.3477	siR344875	GAAGTCGCTTGAGCTTTGGTCTAT	0.257952
siR105390	AGACCGAGCTGCACTAGAAGGATC	20.1202	siR496397	TCCTTCTAGTGCAGCTCGGTCTTT	0.257952
siR106223	AGACGACTAACCATAATACTGCGT	81.1688	siR378138	GCAGTATTATGGTTAGTCGTCTAG	0.515903
siR106277	AGACGAGAATGAACGAGAATACGG	35.9413	siR423512	GTATTCTCGTTCATTCTCGTCTCC	0.343936
siR106489	AGACGATCCTAGCAGAGCTTCATC	45.8294	siR519340	TGAAGCTCTGCTAGGATCGTCTTT	0.601887
siR106595	AGACGATGCGAGGAAGCTAACCTG	10.748	siR417297	GGTTAGCTTCCTCGCATCGTCTTT	0.601887
siR106795	AGACGCGCGGAGGCAGAAGGATGT	136.542	siR172285	ATCCTTCTGCCTCCGCGCGTCTGC	0.257952
siR106810	AGACGCGTGGTTTCTGTTCGTGGT	187.101	siR221848	CACGAACAGAAACCACGCGTCTAC	0.773855
siR106848	AGACGGAAGGGGAAAATCCACGGA	26.655	siR305089	CGTGGATTTTCCCCTTCCGTCTTT	0.0859839
siR107034	AGACGGTCAGGCGAGGTGGAGACG	96.13	siR507157	TCTCCACCTCGCCTGACCGTCTCC	0.257952
siR107056	AGACGGTGGCCTCAATCTGTTGCA	20.2922	siR207715	CAACAGATTGAGGCCACCGTCTAG	2.40755
siR107159	AGACGTCCTAGAGCAGATACGAAG	32.5879	siR502109	TCGTATCTGCTCTAGGACGTCTAT	0.515903
siR107198	AGACGTGAGTGGGAAGACTAATGG	135.081	siR193577	ATTAGTCTTCCCACTCACGTCTCA	0.343936
siR107301	AGACTAAGAAGACTCTACCGGTGA	305.157	siR74797	ACCGGTAGAGTCTTCTTAGTCTCG	0.0859839
siR107368	AGACTACCAAGCACTGACAACCGC	21.496	siR418040	GGTTGTCAGTGCTTGGTAGTCTGT	0.0859839
siR107500	AGACTATGGTCCATGGACAAGACG	100.773	siR516134	TCTTGTCCATGGACCATAGTCTTT	0.171968
siR107586	AGACTCCGAACTAAGAAGTGCAAA	16.079	siR531752	TGCACTTCTTAGTTCGGAGTCTGG	0.0859839
siR107617	AGACTCGCTACAAAGACCTGGCCG	28.5466	siR381948	GCCAGGTCTTTGTAGCGAGTCTTT	0.0859839
siR107728	AGACTGATTGCCGCATACATGTTT	12.4677	siR64754	ACATGTATGCGGCAATCAGTCTGT	0.343936
siR108343	AGAGAAGGAACAAGGAGGACAGGA	85.8119	siR328316	CTGTCCTCCTTGTTCCTTCTCTGC	0.257952
siR108558	AGAGACAGATGTGTATGAGGACCC	15.993	siR427135	GTCCTCATACACATCTGTCTCTGT	0.0859839
siR108718	AGAGACCTACTAGACTAGTACGCC	50.3866	siR301299	CGTACTAGTCTAGTAGGTCTCTAT	0.0859839
siR108736	AGAGACGAACACTCCGATCAATGA	20.4642	siR197916	ATTGATCGGAGTGTTCGTCTCTTT	0.171968
siR108740	AGAGACGAAGTTCAAAAAGGAATC	10.2321	siR575913	TTCCTTTTTGAACTTCGTCTCTTC	5.15903
siR108818	AGAGACGGAGAGACAATGCAAATC	12.8976	siR599040	TTTGCATTGTCTCTCCGTCTCTTT	0.0859839
siR108832	AGAGACGTACTTCACCTTCACCCA	14.7892	siR415363	GGTGAAGGTGAAGTACGTCTCTGA	1.89165
siR109270	AGAGATATGCGGATGATTAACAGA	24.5914	siR561784	TGTTAATCATCCGCATATCTCTGT	0.601887
siR109585	AGAGCAAAAGATCCGAATTGAACC	48.237	siR571311	TTCAATTCGGATCTTTTGCTCTTA	0.0859839
siR109777	AGAGCATCGACAGTTGATTTGCGC	46.2593	siR373590	GCAAATCAACTGTCGATGCTCTAG	0.0859839
siR109873	AGAGCCCTTGCTTTGTCAGTACTG	12.0377	siR420657	GTACTGACAAAGCAAGGGCTCTGA	0.515903
siR110117	AGAGCTCACACATGGACGGTCCTG	51.6763	siR400291	GGACCGTCCATGTGTGAGCTCTGC	0.0859839
siR110186	AGAGCTGGACGGGATGTACTACTT	13.3275	siR422186	GTAGTACATCCCGTCCAGCTCTAC	0.0859839
siR110234	AGAGCTTGGAACAATGAAGAGTGA	284.263	siR93722	ACTCTTCATTGTTCCAAGCTCTAG	0.343936
siR110381	AGAGGACGAGCGCAACGAGTACAC	16.165	siR420622	GTACTCGTTGCGCTCGTCCTCTCC	7.65257
siR110451	AGAGGAGGCGGCGACTGCATCTGG	12.5536	siR114187	AGATGCAGTCGCCGCCTCCTCTCC	0.343936
siR110520	AGAGGATCCCAGTTAGAAACATGA	11.1779	siR191633	ATGTTTCTAACTGGGATCCTCTTT	0.343936
siR110639	AGAGGCAGAAAGTAGCATGAGTGG	137.832	siR91863	ACTCATGCTACTTTCTGCCTCTGC	0.171968
siR110642	AGAGGCAGAAAGTAGTATGAGTGG	201.976	siR91739	ACTCATACTACTTTCTGCCTCTGC	0.257952
siR110643	AGAGGCAGAAGAGTGGGGACTAAG	11.3499	siR467601	TAGTCCCCACTCTTCTGCCTCTGC	0.429919
siR110746	AGAGGCGAAAGAAGTAGGCAGCAG	14.7032	siR395347	GCTGCCTACTTCTTTCGCCTCTCG	0.0859839
siR110848	AGAGGGCAGGATAGAAGAGGCGCT	30.8682	siR289796	CGCCTCTTCTATCCTGCCCTCTCC	0.0859839
siR111008	AGAGGTCAGGTAATGCTCGTTATC	16.4229	siR448530	TAACGAGCATTACCTGACCTCTAC	0.171968
siR111186	AGAGGTTGGGATTCATGGTATAAA	10.0601	siR469221	TATACCATGAATCCCAACCTCTGA	0.0859839
siR111280	AGAGTACTCGATTTCATGAAGACA	174.375	siR514189	TCTTCATGAAATCGAGTACTCTGT	0.429919
siR111579	AGAGTGAATTTTGCAGCAAATGGG	31.6421	siR245815	CATTTGCTGCAAAATTCACTCTAT	0.0859839
siR111630	AGAGTGCCTAGTAGCGGAGTCGGG	13.1555	siR281592	CGACTCCGCTACTAGGCACTCTCT	0.171968
siR111823	AGAGTTGAGTCCAAGGCGGTCGAG	15.735	siR279051	CGACCGCCTTGGACTCAACTCTGA	0.601887
siR112104	AGATAATGAAGAAGTCTAGGATGG	33.1898	siR171121	ATCCTAGACTTCTTCATTATCTAA	0.0859839
siR112283	AGATAGACCAAAGCTCAAGCGACT	98.6235	siR500287	TCGCTTGAGCTTTGGTCTATCTAC	0.257952
siR112435	AGATATAAGCAGTTGGATGGTGTC	83.1464	siR219883	CACCATCCAACTGCTTATATCTCC	0.0859839
siR112585	AGATATGCGGATGATTAACAGAGA	16.5949	siR513030	TCTGTTAATCATCCGCATATCTCT	0.257952
siR112840	AGATCATAACGAGGACGCCGCTGC	20.2922	siR124080	AGCGGCGTCCTCGTTATGATCTTC	0.0859839
siR113041	AGATCCGGAACACATACATTGAGC	10.0601	siR478713	TCAATGTATGTGTTCCGGATCTTC	0.0859839
siR113048	AGATCCGGCCGGCTAGCAGTAGAG	31.4701	siR310788	CTACTGCTAGCCGGCCGGATCTGC	0.0859839
siR113144	AGATCCTTTTGGTGTAGCTCGGTC	85.6399	siR261161	CCGAGCTACACCAAAAGGATCTGA	2.83747
siR113253	AGATCGGTTTGGGAGATATGGTAC	21.7539	siR68839	ACCATATCTCCCAAACCGATCTCG	0.171968
siR113672	AGATGACACCAACAAGTATTCTGA	11.0919	siR103444	AGAATACTTGTTGGTGTCATCTTA	0.343936
siR113752	AGATGACGAGACAGATGAATATGC	13.5855	siR162110	ATATTCATCTGTCTCGTCATCTCC	6.79273
siR113869	AGATGACGTAGGCTGCTGTGTAAC	72.3124	siR453551	TACACAGCAGCCTACGTCATCTAG	0.0859839
siR113935	AGATGAGATGTATGCGGTTGGATG	15.821	siR486654	TCCAACCGCATACATCTCATCTTT	0.257952
siR114056	AGATGATGGCTTGCATTCTAGATG	48.5809	siR505003	TCTAGAATGCAAGCCATCATCTAT	0.773855
siR114168	AGATGCAGAACTAGTTAAGGGTGA	21.324	siR71862	ACCCTTAACTAGTTCTGCATCTAA	0.343936
siR114433	AGATGCTCTAAGCTGGTTGTCGTT	72.9143	siR277881	CGACAACCAGCTTAGAGCATCTGT	1.46173
siR114767	AGATGTACGAAGTTATAACCCTGA	69.0451	siR137070	AGGGTTATAACTTCGTACATCTTG	1.71968
siR114798	AGATGTAGGCGAGCTGAGTTACCA	12.2957	siR419012	GTAACTCAGCTCGCCTACATCTCC	0.257952
siR114833	AGATGTATGCGGTTGGATGGTGTC	35.8553	siR219882	CACCATCCAACCGCATACATCTCA	0.429919
siR114992	AGATGTGTGGTTCAAGGCGATGTC	21.152	siR239224	CATCGCCTTGAACCACACATCTAG	0.0859839
siR115084	AGATGTTTGCATATGGTCGTCTGG	211.778	siR106049	AGACGACCATATGCAAACATCTTT	3.1814
siR115102	AGATTAACAAGACCGCAACAACCT	49.4407	siR443540	GTTGTTGCGGTCTTGTTAATCTTC	0.0859839
siR115203	AGATTATCCCATGGTAGCTAGACA	10.2321	siR505331	TCTAGCTACCATGGGATAATCTAC	0.171968
siR115214	AGATTATGATAGCACACTTTCACC	18.2286	siR517774	TGAAAGTGTGCTATCATAATCTAA	0.0859839
siR115231	AGATTATTGCATGGCAAGGACTAC	12.8976	siR143671	AGTCCTTGCCATGCAATAATCTTA	0.0859839
siR115270	AGATTCAGCGTTGGGACCAATAAA	26.9989	siR475201	TATTGGTCCCAACGCTGAATCTTT	0.0859839
siR115347	AGATTCCGGTAAGTACATAATGTA	15.5631	siR244136	CATTATGTACTTACCGGAATCTAA	0.0859839
siR115535	AGATTGACTCGCGTGGGAATCGGA	61.0486	siR286681	CGATTCCCACGCGAGTCAATCTGA	0.0859839
[truncated: 6,539 more rows]
