# Supplementary material for: Genome-Wide Analysis of 24-nt siRNAs Dynamic Variations during Rice Superior and Inferior Grain Filling
Source: PLoS One. 2013 Apr 12;8(4):e61029. doi: 10.1371/journal.pone.0061029 (PMC3625182; doi:10.1371/journal.pone.0061029)
Supplement: Table S2 — Collection of 24 nt-siRNAs greater than 10TPM and their dynamics in the ten sample libraries during grain filling. (XLS) [file pone.0061029.s006.xls]

## Sheet: siRNA_matched_uniqpos_24nt_gt10
Table S2, Collection of 24nt-siRNAs greater than 10TPM and their dynamics in the ten sample libraries during grain filling.
name	sequence	length	TPM in S_10DAF	TPM in S_15DAF	TPM in S_21DAF	TPM in S_27DAF	TPM in S_35DAF	TPM in I_10DAF	TPM in I_15DAF	TPM in I_21DAF	TPM in I_27DAF	TPM in I_35DAF	location on genome
siR217	AAAAACAAAATGTAGGAGCAATAG	24	14.5976	0	0	0	0	0	43.5048	0	0	0				13108.m02607_intr1-antisense
siR396	AAAAACTCGACGAGATTGGAGGTG	24	10.6675	4.88819	0	0	0	36.3712	35.8275	17.6868	0	0					13108.m02607_intr3-sense
siR420	AAAAACTTTGAATAGGACGAATGA	24	49.1968	0	0	0	0	0	0	0	0	0
siR511	AAAAAGGAGCACACAGCATCGTCA	24	0	0	0	0	0	0	18.6815	0	0	0
siR908	AAAAATGCGTAACTTTCCGATCGT	24	1.40362	2.25609	0	0	0	8.34044	12.0278	2.66253	4.06719	0
siR1389	AAAACCGACAAGAAGACACATGAT	24	9.47441	5.86583	0	0	0	29.4925	21.1553	23.3923	9.5466	6.43645
siR1544	AAAACGACAACCAGCTTAGAGCAT	24	8.00062	4.36177	0.439418	0	0	49.4407	48.1965	25.4843	8.41683	1.44639
siR1741	AAAACTCGACGACAAAGATCAGCA	24	0	0	0	0	0	0	13.478	0	3.44581	0
siR1868	AAAACTTGTGACCTCAGATGAGCA	24	0	0	0	0	0	0	0	0	53.2124	0
siR1979	AAAAGACAGCTCTTATCATGTGTG	24	5.33374	0	0	0	0	0	0	10.2064	5.14048	0
siR1986	AAAAGACCCATGGATACCCTAGAG	24	6.10573	0	0	0	0	24.1615	20.5582	14.3904	6.72216	0
siR1996	AAAAGACCGAGCTACACCAAAAGG	24	0	0	0	0	0	0	16.9754	0	0	0						LOC_Os06g48550.1|13106.m05162|1000bp_UpstreamSeq|29375998..29377000
siR2004	AAAAGACCGAGCTGCACTAGAAGG	24	0	0	0	0	0	13.3275	9.89521	4.24738	0	0
siR2028	AAAAGACGATCCTAGCAGAGCTTC	24	6.80754	3.45934	0	0	0.0938228	16.6809	20.1316	13.6296	6.0443	2.74815	LTR/Gypsy:0
siR2045	AAAAGACTCGCATGCTAACTTGAC	24	0	0	0	0	0	12.2097	0	0	0	0	SINE:1
siR2090	AAAAGAGTGGTCACCTGGTCGTCA	24	9.68496	0	2.54862	0	0	0	5.80064	3.61344	18.4718	3.54366		13111.m00819_exon7-antisense		13111.m00819_intr7-antisense
siR2135	AAAAGATGAGATGTATGCGGTTGG	24	0	0	0	0	0	18.6585	11.9425	0	6.32674	0			13112.m00961_exon1-sense
siR2149	AAAAGATGCCGACAGTACGTCCAA	24	12.0711	6.39225	2.81228	1.28782	0.844405	0	5.28882	19.5253	13.4443	4.26686					13112.m03275_intr1-sense
siR2160	AAAAGATGTCATGAGCTTGCTGTA	24	5.68465	3.15852	0.615185	0	0	18.7445	23.4585	10.2698	6.83514	1.88031		13108.m02607_exon7-antisense
siR2210	AAAAGCAAGTGTATGACGAACTAA	24	12.0711	0	4.04265	0	0	0	0	0	0	0	LTR/Gypsy:1
siR2241	AAAAGCAGGATGCGTTGTGTAGAG	24	0	0	0	0	0	0	298.477	0	0	0
siR2254	AAAAGCATATAACTCCGGTAACAA	24	0	0	0	0	0	0	0	10.0162	0	0
siR2433	AAAAGGAGCACACAGCATCGTCAC	24	0	0	0	0	0	20.2062	0	0	0	0
siR2443	AAAAGGATCTGAAACAGCTCGGTA	24	0	0	0	0	0	158.296	0	0	0	0						LOC_Os06g48550.1|13106.m05162|1000bp_UpstreamSeq|29375998..29377000
siR2480	AAAAGGCGGCAAGCAGTCACTCTC	24	6.10573	4.58738	0	0	0	18.5725	16.1224	0	5.93132	0
siR2587	AAAAGTACTCTCAGATGTCTGCAA	24	0	32.0365	0	0	0	0	177.261	102.698	55.6414	0
siR2866	AAAAGTGTTGAGCAAGTTGAGCAT	24	0	0	0	0	0	0	0	0	14.0657	0
siR3100	AAAATAGCATGAGTGGGGGCTGAG	24	0	0	0	0	0	37.317	0	0	5.59239	0
siR3177	AAAATATATTCATGGTCGTCTGTA	24	8.0708	5.64022	0	0	0	17.9706	24.1409	6.9733	9.88553	1.37407
siR3335	AAAATCAGGGACTAAAGGGGATGC	24	0	0	0	0	0	0	0	6.71973	11.4672	0						LOC_Os06g12000.1|13106.m01302|1000bp_UpstreamSeq|6420379..6419377
siR3377	AAAATCCATCAAGCAGCTACTCGT	24	3.93013	0	0.878836	0	0	12.8116	10.0658	12.0448	3.27635	1.51871
siR3673	AAAATGCTGAACTGGAAAAGATGA	24	0	0	0	0	0	0	0	0	16.7772	0				13101.m01409_intr7-antisense
siR3682	AAAATGGAAACAAAAAGAAGCTGG	24	0	0	2.81228	0	0	0	81.7208	0	0	0
siR3742	AAAATGTAGAGTCGATGGTCCATG	24	0	4.13616	0	0	0	0	0	12.3618	10.1115	5.85789				13107.m00953_intr2-antisense
siR4102	AAACAAAATGCAGGAGTAGTAGAA	24	12.4922	4.43697	0	0	0	0	0	0	0	0				13108.m02607_intr6-antisense
siR4103	AAACAAAATGTAGGAGCAATAGAA	24	0	0	0	0	0	0	0	47.8622	0	0				13108.m02607_intr1-antisense
siR4129	AAACAAACTAGATCAAGAGGCATA	24	0	0	0	0	0	0	22.9467	11.918	0	0
siR4245	AAACAACGAGTAGAATGAGAGGTG	24	0	11.2052	0	0	0	0	0	0	0	0
siR4279	AAACAAGAATTTGCTGACGTGTTT	24	0	0	0	0	0	0	37.7895	0	0	0				13105.m04595_intr2-antisense
siR4328	AAACAAGTGCAGTGGACCCAGATA	24	0	0	0	0	0	0	12.5396	32.9013	0	0
siR4386	AAACAATGATCGAGACGGTTATGC	24	0	0	0	0	0	11.3499	0	0	0	0
siR4425	AAACACAAGCACACGGACTAGCGG	24	0	1.20325	0	0	0	0	12.0278	8.051	0	0	LTR:0
siR4456	AAACACAGTAGGGGTAGAAGAGAC	24	0	0	0	0	0	38.0049	0	0	0	0				13106.m02474_intr2-antisense
siR4563	AAACACGCAAGAAGATGAAATCTG	24	0	0	0	0	0	13.5855	8.78626	0	3.44581	0			13106.m05162_exon1-sense
siR4738	AAACAGGAGGTAGGCAAAGTTGGT	24	0	0	0	0	0	216.421	184.682	0	0	0
siR4821	AAACATACAAAATTAATTCTGGCA	24	10.5271	0	0	0	0	20.3782	31.6476	16.8627	0	0
siR4857	AAACATAGACTTCAGCACGACACT	24	0	0	0	0	0	0	22.6907	0	0	0
siR4862	AAACATAGCAGGGGTAGAAGCGAT	24	0	0	0.175767	0	0	0	24.8233	15.5948	0	0
siR4919	AAACATCATGTAGAAGCATTTTTC	24	13.1238	0	0	3.00491	0	0	0	16.7359	17.3421	0
siR5027	AAACATGCCTCTTAGTATCGTTGC	24	1.89488	0	0	0	0.187646	12.5536	28.0649	3.74023	1.97711	0
siR5153	AAACATTGTGATCCTCCTGACTGT	24	12.422	0	0	0	0	65.5197	60.3949	35.8174	14.8565	0				13101.m02191_intr1-antisense
siR5239	AAACCAATAGGAAAATAGCTGCAG	24	0	0	0	0	0	0	13.5633	0	0	0
siR5629	AAACCGACACAAGGGACTAGATGC	24	8.49188	0	2.63651	0	0	0	7.2508	22.1878	11.8626	6.00253
siR5665	AAACCGAGTCTGGACAGTGGCATT	24	28.6338	7.06908	0	0	0	62.5103	75.323	22.8851	9.32065	0.723196
siR5859	AAACCTACTGGCATACTTAGAACC	24	0	0	0	0	0	45.8294	0	0	0	0	LTR/Gypsy:1
siR5873	AAACCTATGAGAGAATATGAGCTT	24	7.43917	0	0	0	0	0	23.2879	0	0	0
siR5947	AAACCTTGTAAAGACGAGAACCCA	24	0	0	0	0	0	0	35.5716	0	11.0153	0				13108.m02607_intr6-antisense
siR6022	AAACGACAACCAGCTTAGAGCATC	24	9.19369	6.24185	0	0	0	42.0461	46.4904	26.1816	9.71607	2.09727
siR6132	AAACGAGCTCGAGCGGTGAGGCGA	24	0	0	0	0	0	0	32.9272	20.1592	0	0
siR6313	AAACGCCATCGCCAGACAACACGC	24	0	0	0	0	0	11.4359	9.98051	6.40276	0	0				13107.m00837_intr4-antisense
siR6486	AAACGTAGACTCAAGAAGTAGTAG	24	0	0	0	0	0	0	0	44.5024	0	0
siR6497	AAACGTATGTAGAAGGTGGGATGA	24	0	0	0	0	0	0	0	16.1654	0	0
siR6845	AAACTCAGAGACGTACTTCACCTT	24	11.5097	0	0	0	0	0	45.2962	0	17.9069	0
siR6909	AAACTCCTCTACATTGATCGTTGC	24	38.038	24.3658	0	0	5.91084	113.585	118.913	53.1873	37.2826	14.247	LTR/Copia:0
siR6920	AAACTCGACGAGATTGGAGGTGGC	24	12.5624	7.36989	0	0	0	38.3488	33.6096	20.8565	10.168	2.24191					13108.m02607_intr3-sense
siR7079	AAACTGCAAGAAGAATCGACTGAG	24	0	17.7479	0	0	0	0	0	74.8679	0	0
siR7252	AAACTTAAACTTGCGAAGGATTGT	24	5.40393	4.73779	0	0	0	0	0	10.0162	13.7833	4.33918
siR7383	AAACTTCTAGCTCTTCGGATCCAT	24	15.8609	0	0	0	0	0	0	0	0	0			13105.m03221_exon3-sense
siR7570	AAAGAAAAACTGCAGCGGAAAACA	24	0	0.526421	0	0	0	15.1332	12.369	10.7135	0	0.0723196	LTR/Gypsy:1	13112.m00961_exon2-antisense		13112.m00961_intr1-antisense
siR7586	AAAGAAACAAGCAGAACCCGATGA	24	0	0	0	0	0	0	0	0	21.3528	0			13102.m03185_exon2-sense
siR7699	AAAGAAGGCACCTGTCATACTTGC	24	0	0	0	0	0	38.7787	0	20.7297	0	0
siR7701	AAAGAAGGTGGAACTAGAAGGTGT	24	0	0	0	0	0	117.282	0	0	0	0
siR7906	AAAGACCGAGCTACACCAAAAGGA	24	11.7904	8.04672	1.66979	0	0	59.5008	46.4051	38.7335	16.8337	6.94268						LOC_Os06g48550.1|13106.m05162|1000bp_UpstreamSeq|29375998..29377000
siR7913	AAAGACCGAGCTGCACCAGAAGGA	24	0	0	0	0	0	32.5879	0	0	0	0
siR7915	AAAGACCGAGCTGCACTAGAAGGA	24	0	0	0	0	0	49.1828	36.5952	23.2655	12.3146	0
siR7916	AAAGACCGAGCTGCACTTGAAGGA	24	0	0	0	0	0	0	48.5377	0	0	0
siR7990	AAAGACGATCCTAGCAGAGCTTCA	24	46.8808	26.697	0	0	0	122.441	128.211	80.8903	38.8078	0	LTR/Gypsy:0
siR8053	AAAGACTAATAAGGGGGCATTTGC	24	10.2464	5.1138	0	0	0	16.079	9.21278	4.62774	9.15118	0					13108.m02607_intr6-sense
siR8070	AAAGACTCGCTACAAAGACCTGGC	24	0	2.70731	0	0	0	17.9706	15.7812	0	3.84124	0	LTR/Gypsy:0					LOC_Os11g37770.1|13111.m03701|1000bp_UpstreamSeq|21875588..21874586
siR8103	AAAGACTTTCAGGCACCATTGATG	24	0	0	0	0	0	36.7151	0	0	0	0
siR8260	AAAGAGTGGTCACCTGGTCGTCAA	24	0	10.1524	0	0	0	0	0	0	31.0688	0		13111.m00819_exon7-antisense		13111.m00819_intr7-antisense
siR8369	AAAGATCCAGGCAGCAGGAACAAC	24	0	0	0.439418	0	0	17.2828	0	0	1.29924	0
siR8479	AAAGATGAGATGTATGCGGTTGGA	24	0	0	0	0	0	13.3275	0	4.81792	0	1.15711			13112.m00961_exon1-sense
siR8540	AAAGATGGGGACTATGCAATATAG	24	20.0717	0	0	0	0	28.2887	0	0	0	0
siR8584	AAAGATTCAGCGTTGGGACCAATA	24	27.5811	0	0	0	0	126.568	112.857	0	0	0				13108.m02607_intr6-antisense
siR8620	AAAGATTGTATTCTGCACCGTGCA	24	0	0	0	0	0	16.5949	4.60639	0	0.677865	3.6883
siR8735	AAAGCACTTTGAGACGTAGATTAT	24	0	0	0	0	0	31.4701	0	0	0	0	LTR/Gypsy:0
siR8746	AAAGCAGAGAAGGAACAAGGAGGA	24	0	0	0	0	0	63.2841	31.3064	0	0	0	LTR/Gypsy:1
siR8986	AAAGCCTAAGACTGCATAGCCACT	24	14.5274	0	0	0	0	84.2642	63.8923	55.9132	0	0						LOC_Os12g09060.1|13112.m00961|1000bp_UpstreamSeq|4735236..4734234
siR9045	AAAGCGACGCCGGGGCAGATATGG	24	0	0	0	0	0	12.3817	7.76262	5.19828	1.0168	0	LTR/Gypsy:1					LOC_Os03g28370.1|13103.m03313|1000bp_UpstreamSeq|16344077..16345079
siR9094	AAAGCGGGAAAAGAGGAACGTTAG	24	0	0	0	0	0	0	22.776	18.511	7.68247	0
siR9125	AAAGCTAATGACGGAACCTCTTAT	24	0	0	0	0	0	0.343936	0	24.153	15.3649	0					13101.m07604_intr4-sense
siR9169	AAAGCTCAAAGACGTGGATCAGGA	24	0	0	0	0	0	11.8658	0	0	0	0
siR9212	AAAGCTGAGATGGAGATAGGATAG	24	0	0	0	0	0	52.5362	30.7093	34.3594	0	0
siR9247	AAAGCTGTTGGATCCGGTATGTAT	24	41.126	0	12.5674	0	6.84907	0	15.2693	43.5515	62.2506	26.6136
siR9278	AAAGCTTGGAGGATGATGCAAAAA	24	0	0	0	0	0	0	16.4636	13.3761	0	0						LOC_Os06g33890.1|13106.m03500|1000bp_UpstreamSeq|19710500..197115
siR9313	AAAGGAACTGGTGAACGACTTGGC	24	7.57953	0	0	0	0	51.4184	0	31.6968	0	0
siR9337	AAAGGAATGAATTGAAGGATGGTG	24	0	0	0	0	0	51.9343	0	0	0	0
siR9439	AAAGGATCTGAAACAGCTCGGTAA	24	33.3359	0	0	0	0	0	0	52.7435	0	0						LOC_Os06g48550.1|13106.m05162|1000bp_UpstreamSeq|29375998..29377000
siR9495	AAAGGCAGACGGTGGGTAACTTGG	24	0	0	0	0	0	0	0	20.2226	0	0			13107.m05009_exon1-sense
siR9512	AAAGGCATCAAGTGGAAATCCTCT	24	0	2.78251	0	0	0	13.4995	0	0	0	0						LOC_Os01g16060.1|13101.m01782|1000bp_UpstreamSeq|9042203..9041201
siR9574	AAAGGCGGCAAGCAGTCACTCTCA	24	12.6326	6.69306	2.28497	0	0	28.9766	33.1831	11.6644	10.2245	0
siR9585	AAAGGCTAAGACTACACCATATAT	24	3.15814	1.05284	0	0	0	11.3499	8.61566	7.92421	1.29924	0.578557					13112.m00961_intr1-sense
siR9616	AAAGGCTTGTGAAGATGTTCCCAT	24	10.7377	0	0	0	0	52.4502	42.3106	23.8994	16.0428	0
siR9628	AAAGGGACTATATGGCACAGCTCC	24	0	0	0	0	0	0	15.0134	4.37416	0	0
siR9762	AAAGGTCCGAACAAGCACAACTGA	24	3.22832	0	0	0	0	12.0377	16.0371	8.24118	4.91452	1.73567						LOC_Os02g12880.1|13102.m01422|1000bp_UpstreamSeq|6797730..6798732
siR9778	AAAGGTCTTTGAATAGTTGGAGGG	24	0	0	0	0	0	17.2828	0	0	0	0
siR9782	AAAGGTGATACGCTCAGAAGACAT	24	0	5.94103	0	0	0	0	0	0	14.1222	0						LOC_Os01g66070.1|13101.m07147|1000bp_UpstreamSeq|38342367..38343369
siR9814	AAAGGTTCTGATAATCAACGGTTT	24	0	0	0	0	0	9.37224	10.0658	0	2.14657	0	LTR/Gypsy:0
siR9861	AAAGTAATAGGTCATCGTCGATTC	24	0	0.75203	0	0	0	4.47116	10.2364	0	0	0
siR10516	AAAGTGAGCACAAGTTGAGATTGG	24	0	0	0	0	0	14.1014	0	0	0	0
siR10583	AAAGTGGAGTCGAAGGCAGAGATC	24	0	0	0	0	0	0	10.4923	18.511	9.37713	2.60351	LTR/Gypsy:1
siR10906	AAAGTTGTCTGTGTTCTTCGGTAT	24	0	0	0	0	0	0	0	0	0	26.1797							LOC_Os11g07830.1|13111.m00818|3-UTR
siR11018	AAATAAACTGCAAGAAGAATCGAC	24	0	8.79875	0	0	0	0	27.0412	35.6906	0	0
siR11561	AAATACTTAGGGCTTGTTTGGTAC	24	0	0	0	0	0	17.1108	0	0	5.81834	0	DNA:0
siR11587	AAATAGAAGTTCTGGAACATAGCA	24	0	0	0	0	0	0	22.6907	0	4.18017	0
siR11593	AAATAGAATTGGGCCGCACAGAGG	24	0	0	0	0	0	11.3499	0	2.59914	14.913	0
siR11672	AAATAGCGGACTTCTGCAGAAAGG	24	26.7389	12.4837	7.38222	7.38349	5.44172	0.515903	12.2837	35.1835	19.4886	12.1497
siR11741	AAATAGTTTGAGCTTCAAAGATGG	24	0	1.80487	0	0	0	0	10.7482	0	0	0
siR11849	AAATATATTCATGGTCGTCTGTAT	24	15.6503	16.8455	4.92148	1.45953	0	30.0944	35.4863	11.918	22.9909	4.7731
siR12286	AAATCATAGTAGAAGAGAGCTTGC	24	53.3374	44.821	0	0	0	263.283	181.952	201.275	79.9881	0				13106.m02474_intr2-antisense
siR12469	AAATCCGAAAGCATCATAGATCGC	24	1.40362	0.676827	0	0	0	7.4806	11.8572	3.61344	1.75115	0.940155	LTR/Gypsy:0
siR12509	AAATCCGGAAGCAGCATAGATCAC	24	31.1603	0	0	0	0	169.474	0	0	0	0	LTR/Gypsy:0
siR12656	AAATCGACTAGGGCTTCCACGGTG	24	13.5449	0	0	0	0	64.7459	0	25.4843	17.9634	0
siR12749	AAATCTAGGAACAAAAAGTTGGGG	24	0	0	0	0	0	0	10.8335	0	0	0
siR12832	AAATCTGAGATGCAAGAAGCCGTA	24	0	4.21137	0	0	0	21.238	20.9847	0	7.62598	0
siR13066	AAATGAAGTAGAGCTGCACATGAC	24	0	0	0	0	0	0	0	77.3403	13.1054	0				13107.m00837_intr3-antisense
siR13068	AAATGAAGTCTGACTTATGGTTGT	24	3.15814	0	0	0	0	10.1461	12.2837	5.0081	1.46871	0
siR13485	AAATGCCTCACTGATCTAGTCGTC	24	2.03524	1.27845	0	0	0	7.56658	13.1367	2.78932	2.25955	0
siR13541	AAATGCGGGAGACGAGATGAAGAG	24	2.9476	0	0.0878836	0	0	17.8846	12.1984	10.0162	1.07329	0
siR13552	AAATGCGTAACTTTCCGATCGTCA	24	12.8431	6.31705	1.84556	0.0858545	0	15.821	19.961	6.27597	8.58629	2.53119
siR13818	AAATGGTTTTCTTTTGAATGTTGC	24	0	1.42886	0	0	0	10.0601	0	3.10629	0	0
siR13846	AAATGTAGAATCAGCCGGCTGGCA	24	4.84248	1.72967	0	0	0	13.4995	0	0	0	0
siR13854	AAATGTAGAGTCGATGGTCCATGA	24	0	0	0	0	0	0	0	0	16.8337	5.85789				13107.m00953_intr2-antisense
siR14057	AAATGTTCTCCTTTGATTGTTATG	24	0	0	0	0	0	8.94232	13.478	0	2.71146	0
siR14160	AAATTACAAGGTCGACTGCATCCC	24	31.6516	13.6117	0	0	0	0	0	122.223	25.194	0				13101.m02191_intr2-antisense
siR14194	AAATTACTAGTAGAGGGAAAGTGA	24	0	0	0	0	0	0	0	99.5281	0	0
siR14231	AAATTAGCTCTCTCGGCAGTATGG	24	6.87772	3.38413	0	0	0	0	16.8901	0	4.29315	0	DNA:0
siR14232	AAATTAGCTGAACCATATTTTGAT	24	0	0	0	0	0	0	16.1224	0	0	0
siR14485	AAATTCTGGCACAAGCGATGATCG	24	29.3356	0	0	0	0	0	0	0	28.0184	0
siR14682	AAATTGTATCCATCGTCACATATT	24	4.7723	3.00812	0.263651	0	0	11.4359	15.4399	7.41706	4.18017	0.867836
siR15020	AACAAAATGCAGGAGTAGTAGAAC	24	0	0	0	0	0	15.0472	0	0	0	0				13108.m02607_intr6-antisense
siR15044	AACAAACACTCTGACACAAGAAAG	24	0	0	0	0	0	0	0	12.2984	6.27025	0
siR15102	AACAAACTGGATCGGAGGCATATC	24	0	0	0	0	0	0	13.478	0	0	0						LOC_Os01g20170.1|13101.m02191|1000bp_UpstreamSeq|11470443..11471445
siR15291	AACAACACACGGCACCTGAATGAC	24	0	0	0	0	0	0	56.0444	0	18.0764	2.60351
siR15358	AACAACCACTGAGATCGAGATAGC	24	0	0	0	0	0	12.2097	9.80991	0	0	0
siR15398	AACAACCCTTCCTAAGCTAGGCAT	24	2.45633	0	0.96672	0	0	8.5124	11.6866	6.65634	4.12368	1.59103
siR15453	AACAACGAGTAGAATGAGAGGTGG	24	0	10.1524	0	0	0	75.3219	75.2377	0	0	0
siR15462	AACAACGCCGAGAACATGACCGCA	24	20.4226	12.6341	5.00937	1.37367	0	125.364	106.971	60.7945	24.0077	0
siR15470	AACAACGGAATTTTGCATCATACT	24	0	0	0	0	0	0	14.0751	0	0	0	LTR:0
siR15547	AACAAGACCGCAACAACCTATATT	24	2.73705	2.4817	0	0	0	14.3593	7.93323	11.0939	0	1.44639					13108.m02607_intr7-sense
siR15578	AACAAGATAATGGGGTACTTTCAC	24	6.73736	0	0	0	0	23.4736	19.108	0	0	0
siR15638	AACAAGCGAAAACAGATACTTTGA	24	0	3.68494	0	0	0	0	15.6958	0	0	0
siR15655	AACAAGCTCAAAAAGGATTGTATG	24	10.6675	0	0	0	0	0	0	0	0	0
siR15691	AACAAGGCACATATGTAGATGGAG	24	0	10.1524	0	0	0	42.734	0	0	0	0
siR15728	AACAAGTCAGAGTGTAATGTAGGC	24	0	0	4.48206	0	0	0	11.7719	0	0	0
siR15744	AACAAGTCTTCGGGGTCAGATGGG	24	0	0	0	0	0	0	0	10.5867	0	0	DNA:1
siR15754	AACAAGTGCAGTGGACCCAGATAA	24	0	0	0	0	0	0	12.8808	0	0	0
siR15983	AACAATGGTGTAGAACGGTGTAGA	24	11.7202	3.98576	0	0	0	0	0	0	26.9451	0
siR15990	AACAATGTCGACGAGGAGGAGGAT	24	1.40362	0	0	0	0	16.5089	10.7482	0	0	0			13106.m05162_exon3-sense
siR16029	AACAATTTGAGTGTGGACAGCTAT	24	0	0	0	0	0	23.9895	0	0	0	0				13108.m01397_intr4-antisense
siR16046	AACACAAACGATAGAGAGATGACG	24	20.9139	8.34753	2.72439	0	0	46.2593	41.3722	41.3961	12.371	0
siR16144	AACACACGGCACCTGAATGACGGA	24	17.1943	5.79063	0	0	0	32.8458	40.0927	27.9566	12.0321	0
siR16174	AACACAGATTGTCAAACGTTGGAT	24	0	0	0	0	0	0	0	0	13.5573	9.40155	DNA/Stowaway:1
siR16308	AACACCAGAACCCTATAGCGTCGT	24	0	0	0	0	0	14.8752	0	7.41706	0	0
siR16333	AACACCCACCAGCAGTCGTACTGA	24	3.6494	0	0	0	0	11.6938	14.2457	0	0	0				13112.m04157_intr1-antisense
siR16474	AACACGAACCGGGACTAAAGATGG	24	0	0	3.16381	0	0	0	0	13.693	0	0	DNA/En-Spm:1
siR16664	AACACTGTGGAAGAGTTCGTAAAG	24	2.24579	1.50406	0	0	0	7.13666	13.478	7.10009	2.65497	1.59103			13111.m04455_exon7-sense
siR16760	AACAGAAGAGTAGAGCAACAAAAG	24	0	0	0	0	0	28.4607	0	0	0	0
siR16813	AACAGACGTGGCGAGAAAGAGGGA	24	0	0	0	0	0	674.2	0	0	0	0			13106.m05162_exon3-sense
siR16844	AACAGAGATTTGGCCTGGTAGTGT	24	0	0	0	0	0	0	0	12.9957	0	0
siR16934	AACAGATCGGCATACCTCGCAACC	24	108.429	45.7234	13.0947	0	0.281468	116.25	136.144	45.2631	76.4858	3.47134
siR17149	AACAGGAAGCATGTGTGTAATCAG	24	0	0	0	0	0	11.6078	0	0	2.37253	0
siR17150	AACAGGAAGTAGCATGAGTAGAGT	24	0	0	0	0	0	0	0	51.9828	9.37713	0			13112.m00961_exon8-sense
siR17165	AACAGGAGGGTAGGCATTGTGTAG	24	3.71958	0.451218	0	0	0	32.4159	16.2077	6.46616	0	0
siR17176	AACAGGCATGAGGAGGTAGGTAGG	24	42.5998	0	0	0	0	325.363	178.54	138.262	41.7452	19.9602					13106.m05162_intr1-sense
siR17309	AACAGTCGAAGAGGAAACGTGAAG	24	21.8964	10.9044	0	0	0	71.6246	81.1237	47.3551	26.5497	0
siR17587	AACATATGAATCACTGACGCGGAC	24	0	0	0	0	0	0	0	17.3699	0	0
siR17618	AACATATTTTGTATTGGTCTGTCA	24	10.3166	8.49793	0	0	0	36.4572	37.4483	0	11.6932	0
siR17659	AACATCACGATCAATCAGGAACTG	24	2.59669	1.80487	0.439418	0	0	15.993	16.2077	9.88941	5.08399	0
siR17894	AACATCTGGCAGAATGAGGGCTTC	24	0	0	0	0	0	0	10.2364	25.611	0	9.61851		13101.m00898_exon3-antisense
siR17918	AACATGAAGAGGATAGATCTGTGA	24	11.4395	0	0	0	0	0	0	0	14.913	0			13111.m00819_exon6-sense
siR17960	AACATGATGAGGAAGATGAGCTAT	24	0	0	0	0	0	0	0	10.5867	0	3.39902			13108.m02905_exon1-sense
siR18071	AACATGGAGTTGGGTACGTAAACA	24	9.5446	0	0	0	0	31.2121	0	0	0	0
siR18126	AACATGTAGTTACCGAGCTGTTCC	24	4.42139	2.03048	0.263651	0	0	9.54421	11.6013	8.17778	3.89772	0.723196
siR18440	AACCAAAGACTTTCAGGCACCATT	24	4.56176	0	0.96672	0	0	16.079	13.9898	0	5.19697	0
siR18575	AACCAAGAAGCGGACGAGCAGGAG	24	0	0	0	0	0	0	0	16.2922	0	0							LOC_Os10g13505.1|13110.m07814|3-UTR
siR18604	AACCAAGGAGCTAGAGCGACAGCG	24	0	0	0	0	0	68.1852	59.9684	0	19.997	0
siR18977	AACCAGAAGTAAGACAAAAACACC	24	0	9.70118	0	0	0	32.5879	0	24.5967	0	0
siR18978	AACCAGAAGTAGTAGATAATAAGG	24	0	0	0	0	0	0	10.2364	0	4.5191	0
siR19097	AACCAGGAGACTGCAGGCTTCATC	24	2.38615	1.72967	0	0	0	0	11.516	0	0	0
siR19300	AACCATCGTCCAAGCAATGAAGAA	24	10.3868	0	0	0	1.68881	0	9.89521	31.3165	21.6917	6.50877
siR19486	AACCCAAGTGACTACAGAAGATAT	24	20.0717	20.004	0	0	0	48.3229	47.5994	46.2774	25.3635	9.25691
siR19585	AACCCATGGATTGTCGGTGTGCAC	24	0	0	0	0	0	0	19.4492	7.9876	0	0
siR20093	AACCGACAAGAAGACACATGATGG	24	4.84248	2.40649	0	0	0	20.3782	14.8428	10.3966	4.06719	1.08479
siR20200	AACCGACTGAGTAGGGGGACACGG	24	0	5.41461	0	0	1.59499	0	0	16.7359	14.3481	0
siR20310	AACCGATGTGAACCTAGCAGAGAC	24	0	0	0	0	0	33.7917	0	0	0	0	LTR/Copia:1
siR20336	AACCGCACGACACCTGAATGACGA	24	4.84248	3.08332	0.790953	0	0	26.9989	22.6907	17.2431	6.72216	3.54366
siR20986	AACCTACTGGCATACTTAGAACCC	24	0	0	0	0	0	69.389	0	0	0	0	LTR/Gypsy:1
siR21763	AACGAACTTGAGGAATGCAGCGAA	24	0	0	0	0.515127	0	37.145	37.7042	0	0	6.21949
siR21780	AACGAAGACCTGAACATGAGATGT	24	9.33405	7.89631	4.39418	2.48978	1.87646	0	17.3166	31.1263	18.0764	6.58109
siR21792	AACGAAGCGACGGATTAGCGCATG	24	0	0	0	0	0	0	21.4965	0	0	0	DNA/Tourist:1
siR22055	AACGACAACAGATCAAGAGGATGG	24	0	0.526421	0	0	0	9.97413	10.407	0	0	0.216959	LTR/Gypsy:1		13106.m03500_exon1-sense
siR22074	AACGACAAGGCTAGTGAGCGGATG	24	12.9133	3.53454	3.07593	0	0.562937	0	0.682428	0.950905	2.09008	0.144639
siR22114	AACGACAGCGGAGAGGTAGCAGTA	24	7.15845	2.25609	0	0	0	45.4855	33.7802	21.6806	3.84124	0			13101.m01861_exon3-sense
siR22314	AACGACGGAAGAGTATGCACACAA	24	0	16.0934	0	0	0	0	24.3968	0	50.8964	0					13107.m00953_intr2-sense
siR22334	AACGACGGTGCGGAGAGGGCAGGA	24	0	0	0	0	0	10.92	4.60639	4.37416	0	0
siR22366	AACGACGTCATCACCAACCTCCAC	24	5.33374	3.91055	1.84556	0	0	0	5.20352	0	10.281	4.48382			13112.m03279_exon2-sense
siR22504	AACGAGATAGAGCATTAGAGCTAA	24	18.1768	7.82111	0	0	3.18998	0	8.35975	20.9199	15.7039	2.89279
siR22599	AACGAGTAGAATGAGAGGTGGAGT	24	2.31597	1.05284	0	0	0	11.0059	11.9425	5.45186	0	0
siR22612	AACGAGTCTTAGATGTAGCAATAA	24	0	6.54266	0	0	0	15.821	20.9847	16.6091	9.77256	4.4115
siR22830	AACGATCCTTGCGTAATTCAGCTG	24	20.563	16.319	0	7.7269	0	0	11.9425	25.611	41.2368	19.0201		13111.m00819_exon6-antisense
siR22947	AACGATGAGGTGATGGAGGATAAC	24	15.51	7.5955	3.25169	2.8332	1.68881	0	1.79137	12.5519	20.11	3.6883
siR22999	AACGATGGTGCGGAGAGGGCAAGA	24	2.45633	0	0.0878836	0	0	15.735	17.999	10.5867	1.80764	0.506237
siR23299	AACGCCATCGCCAGACAACACGCA	24	2.24579	0	0	0	0	13.8434	0	0	0	0				13107.m00837_intr4-antisense
siR23324	AACGCCGAGAACATGACCGCACAG	24	2.03524	0	0	0	0	11.9518	0	5.13489	0	0
siR23532	AACGGAATTTATCATGGCAGCAAG	24	0	0	0	0	0	0	10.5776	0	0	0
siR23901	AACGGGCGACAAAGATGACGCATG	24	0	5.86583	0	0	0	7.05068	12.1131	0	0	0						LOC_Os08g12900.1|13108.m01378|1000bp_UpstreamSeq|7667133..7668135
siR24021	AACGGTCGACGACGGTGGTAGGCA	24	0	0	0	0	0	0	0	0	17.7375	0				13107.m00837_intr2-antisense
siR24223	AACGTATCCTAGAACTCAAGAGGC	24	12.7027	6.91867	2.98804	0.944399	0	42.3041	52.8029	32.5844	19.4321	6.58109
siR24268	AACGTCCAGATAACTCGCCGGCTG	24	0	0	0	0	0	12.7256	0	0	0	0	LTR:0
siR24367	AACGTGACGACGAGCAACCCACAA	24	7.71989	3.30893	0	0	0	61.2205	51.2674	21.3003	5.42292	2.09727
siR24571	AACGTTTGATGGGCAGAAGTAACT	24	6.31628	0	0	0	0	33.3617	25.3351	18.0672	0	3.03742
siR24617	AACTAAAGCTGTTGGATCCGGTAT	24	53.4076	37.1503	0	0	0	0	19.7051	61.999	82.0217	39.9204
siR24691	AACTAAGGCTGTGTTCGTTGGAGA	24	0	0	0	0	0	0	16.8048	0	0	0
siR24695	AACTAAGTAGAAGAACAATGCGTA	24	0	0	0	0	0	10.834	0	0	3.44581	0
siR24757	AACTACACCAGATCACTGCTTCTC	24	1.61416	1.35365	0.351534	0	0	12.4677	8.70096	6.52955	1.97711	0.867836				13108.m02607_intr6-antisense
siR24918	AACTACTGAACTGCTGAAGGTGGT	24	51.6531	15.3414	0	0	0	98.3656	97.246	86.2154	24.2337	24.7333						LOC_Os06g23010.1|13106.m02474|1000bp_UpstreamSeq|13426643..13427645
siR24952	AACTAGAACCTGCAGACGGGATAA	24	14.8082	0	0	0	0	0	0	30.429	23.4993	0						LOC_Os12g17660.1|13112.m01871|1000bp_UpstreamSeq|10115536..10114534
siR25111	AACTATAGTCGAAGCTGCATTTCA	24	8.14098	4.81299	0	1.54538	1.68881	0	0	0	11.0718	5.56861
siR25283	AACTCAAGACCGGTCTGTGAAGGA	24	0	0	0	0	0	0	23.4585	0	0	0
siR25294	AACTCAAGGTAGGCTAAACACAGT	24	0	0	0	0	0	0	28.2355	0	0	0
siR25296	AACTCAAGTCTGACCGGGGAAGGC	24	0	0	0	0	0	39.7246	39.7514	20.7931	16.0428	4.33918
siR25339	AACTCAGAGACGTACTTCACCTTC	24	1.75452	0	0	0	0	10.49	7.50671	5.26168	2.09008	0.578557
siR25564	AACTCCTCTACATTGATCGTTGCC	24	0	7.82111	0	0	0	41.9601	0	16.9895	0	0	LTR/Copia:0
siR25596	AACTCGACGAGATTGGAGGTGGCT	24	0	0	0	0	0	0	67.3045	0	8.47331	1.22943					13108.m02607_intr3-sense
siR25620	AACTCGCAGCATCGGACCATCCAA	24	4.35121	0	0	0	0	0	19.7051	8.55815	4.80154	0
siR25700	AACTCTAGACGATGGGGTGGGCTG	24	0	0	0	0	0	94.6683	81.5502	40.3818	0	0				13108.m02607_intr4-antisense
siR25800	AACTCTGAGATAGTACGTGACAAG	24	0	0	0	0	0	0	3.83866	11.6644	0	0						LOC_Os01g66070.1|13101.m07147|1000bp_UpstreamSeq|38342367..38343369
siR25846	AACTCTGTGCTCTATACTACGGTT	24	0	0	0	0	0	0	0	17.2431	0	0
siR25930	AACTGAAGTGGTGAGCATGATGCG	24	0	0	0	0	0	11.2639	0	0	0	0
siR25942	AACTGAATTAGAATGACGTGTGTG	24	85.5505	0	0	0	0	0	258.384	0	0	0
siR25985	AACTGACGGCTAAGATTTGGTGCA	24	13.8256	0	0	0	0	3.69731	3.75336	0	0	0
siR26176	AACTGCATACACCTACCAAAACAC	24	4.14067	0	0	0	0	20.7221	15.4399	16.102	0	0
siR26384	AACTGGCAAATCTGATATCGGTAA	24	17.6856	0	0	0	0	0	0	35.6906	0	0		13104.m00770_exon3-antisense
siR26420	AACTGGCTCTCTGTTGTCCTGCAT	24	0	2.25609	0	0	0	20.8081	16.5489	0	5.19697	1.51871
siR26433	AACTGGGGACCATACTGCCGAGAG	24	0	0	0	0	0	10.49	0	0	0	0	DNA:1
siR26486	AACTGTACTTATGCTGTTAGATGA	24	0	0	0	0	0	34.9095	32.2447	19.1449	0	0
siR26553	AACTGTCCTCGGAATTGACTGCAA	24	20.9139	14.9654	6.50339	0	0	0	0	38.6068	34.2322	17.7183		13104.m04542_exon4-antisense		13104.m04542_intr3-antisense
siR26607	AACTGTGTCTGCGATGGGGAGAGG	24	8.49188	4.81299	0	0	0	65.9496	40.3486	0	0	0						LOC_Os01g16630.1|13101.m01861|1000bp_UpstreamSeq|9436432..9437434
siR26731	AACTTACCTTGGATCTATCCGGAC	24	29.1952	0	0	7.89861	0	0	0	0	50.2185	0
siR26758	AACTTAGGAAAAGATAGTTCGGGG	24	0	0	0	0	0	13.2415	0	0	0	0
siR27200	AACTTGGTAGTCAAGGACGGGTGC	24	0	0	0	0	0	0	21.1553	0	0	0
siR27556	AACTTTTAGATTCCCAGCGTGACG	24	0	1.12804	0	0	0	13.4995	8.53035	8.051	0	1.22943					13108.m02607_intr1-sense
siR27725	AAGAAAAGGGCGGAGGCAGAAAAG	24	0	0	0	0	0	16.3369	0	0	0	0
siR27780	AAGAAACGTTGTCGGGTGGTCGGA	24	0	0	0	0	0	0	0	0	34.1757	0
siR27805	AAGAAAGAGTGTAGCTAATAGGTG	24	0	0	0	0	0	0	96.9901	0	0	0	DNA/MuDR:1				13106.m02114_intr1-sense
siR27876	AAGAAATCAGAAAAGTGGAAATGG	24	4.07049	2.93292	0	0	0	13.6714	0	0	3.78475	0
siR27946	AAGAACACATTCAAGATCGCCTCA	24	0	4.43697	0	0	0	18.0566	30.3681	0	0	3.76062
siR28067	AAGAACTAAGAACTGATGAGCAGC	24	0	0	0	0	0	296.902	0	0	0	0
siR28124	AAGAACTCTTCCTTCATGCATGGC	24	0	0	0	0	0	0	0	31.6334	0	0
siR28465	AAGAATTCACGGAGGACGCTCACA	24	0	0	0	0	0	0	0	0	22.9344	11.2095
siR28708	AAGACATCCAAGCATACTCTCGAA	24	17.0539	0	0	0	0	26.0531	0	0	0	0	LTR/Gypsy:1
siR28821	AAGACCGAGCTACACCAAAAGGAT	24	12.1413	7.29469	1.84556	0	0	42.906	35.3157	27.7664	16.0993	7.30428						LOC_Os06g48550.1|13106.m05162|1000bp_UpstreamSeq|29375998..29377000
siR28831	AAGACCGAGCTGCACTAGAAGGAT	24	27.8618	0	0	0	0	0	0	0	0	0
siR29164	AAGACGATCCTAGCAGAGCTTCAT	24	122.676	0	0	0	0	301.288	0	0	0	0	LTR/Gypsy:0
siR29412	AAGACTAATGGGAGGAAATGAGTG	24	0	0	0	0	0	12.9836	0	3.48665	0	0						LOC_Os06g19790.1|13106.m02114|1000bp_UpstreamSeq|11301571..11302573
siR29488	AAGACTGAAAGTGGAAGGCTCATT	24	0	0	0	0	0	18.7445	0	0	0	0			13111.m04455_exon6-sense
siR29635	AAGAGAAATGAATAAGATGGACGA	24	0	0	0	0	0	0	356.228	0	64.7361	10.8479						LOC_Os12g40000.1|13112.m04157|1000bp_UpstreamSeq|24697598..24696596
siR29636	AAGAGAAATGAATAAGATGGCTGA	24	19.9314	8.34753	0	0	0	61.2205	42.3959	20.1592	16.0993	1.37407
siR29683	AAGAGAATTCGATAAGCAACTGAA	24	0	0	0	0	0	0	0	12.1082	0	0
siR29690	AAGAGACCAACAAGTAGCAGCTGC	24	0	3.30893	0	0	0	0	0	16.5458	0	0	LINE/L1:0
siR29743	AAGAGAGATGAGTTGTTAGACGTA	24	0	0	0	0	0	0	17.8284	0	0	0
siR29847	AAGAGATTGTGTTGTTTGTTCTGT	24	0	0	0	0	0	15.821	14.2457	0	4.80154	0
siR29858	AAGAGCAAAAGATCCGAATTGAAC	24	0	0	0	0	0	12.8976	8.78626	0	0	2.60351
siR30073	AAGAGGATTAAACGGTCAGAATGG	24	0	0	0	0	0	0	13.3074	0	0	0
siR30103	AAGAGGGACGTACCAGGAAGATGG	24	0	0	0	0	0	0	0	35.6272	0	0
siR30269	AAGAGTGGTCACCTGGTCGTCAAA	24	10.3868	5.64022	4.56995	2.40393	0	0	2.3885	1.52145	15.5344	1.51871		13111.m00819_exon7-antisense		13111.m00819_intr7-antisense
siR30528	AAGATCAAGACACATTAATTCGCT	24	0	0	0	0	0	16.165	14.8428	10.143	4.18017	2.38655				13102.m03554_intr2-antisense		LOC_Os02g32780.1|13102.m03553|1000bp_UpstreamSeq|19464461..19463459
siR30587	AAGATCCAGGCAGCAGGAACAACA	24	0	0	0	0	0	0	16.2077	0	0	0
siR30700	AAGATGAAGAACTACCCAAGCAGT	24	0	0	0	0	0	38.6068	0	0	0	0					13108.m01648_intr1-sense
siR30705	AAGATGAAGCCTGCAGTCTCCTGG	24	6.17591	2.78251	0.790953	0.0858545	0	8.5124	15.6958	11.0939	4.18017	0.723196
siR30825	AAGATGCGGCGAAGGATTGACAAC	24	0	0	0	0	0	0	0	10.9037	0	5.64093
siR31012	AAGATTAACAAGACCGCAACAACC	24	0	0	0	0	0	26.741	0	0	6.21376	0					13108.m02607_intr7-sense
siR31050	AAGATTCAGCGTTGGGACCAATAA	24	35.7221	0	0	0	0	122.785	0	61.999	0	0				13108.m02607_intr6-antisense
siR31123	AAGATTGTAGAGCCGGCCCTGCTT	24	6.45664	3.53454	0	0	0	34.1356	30.7946	27.5129	6.49621	4.4115
siR31170	AAGATTTGTAGTCATCGTCGATAT	24	18.8085	0	0	0	0	0	38.4719	0	0	0	LTR/Gypsy:1
siR31173	AAGATTTGTGCAGATACCATTACC	24	0	0	0	0	0	21.8399	0	0	0	0
siR31207	AAGCAAAACTATCGGAACCAAGCA	24	0	0	0	0	0	288.648	0	235.191	0	0
siR31213	AAGCAAAATGAGTGGGGCCGATAG	24	0	0	0	0	0	13.8434	10.8335	8.11439	0	0				13106.m05162_intr1-antisense
siR31229	AAGCAAACCCGAGTAGAAATCAAC	24	0	0	0	0	0	11.1779	0	0	0	0
siR31296	AAGCAACGACAGCGGAGAGGTAGC	24	0	0	0	0	0	19.2604	11.3454	11.5376	3.78475	0			13101.m01861_exon3-sense
siR31336	AAGCAACTCGACGATTCTTGATAT	24	20.8437	16.5446	0	0	0	77.7294	77.4556	0	24.6856	0			13107.m00837_exon7-sense
siR31358	AAGCAAGCATACTCTGAAGATTCA	24	18.1067	11.2804	0	0	0	49.5267	55.8738	50.0176	20.223	10.1971						LOC_Os11g28370.1|13111.m02728|1000bp_UpstreamSeq|15869584..15870586
siR31424	AAGCAATGCAAGACCGTAGTTAGT	24	14.9485	0	0	0	0	82.2866	62.1863	46.5944	11.0153	0
siR31433	AAGCAATGTTGAAGGATGAATGTA	24	0	18.1239	0	0	0	0	0	0	0	0						LOC_Os12g17660.1|13112.m01871|1000bp_UpstreamSeq|10115536..10114534
siR31504	AAGCACCCAGAACAACAGATCGAG	24	0	0	0	0	0	0	22.0083	17.9404	0	3.76062						LOC_Os07g27060.1|13107.m02687|1000bp_UpstreamSeq|15676541..15677543
siR31558	AAGCACGTATGACTAGTAAAGACA	24	0	0	0	0	0	0	0	0	19.7711	0	DNA/hAT:1
siR31580	AAGCACTGAACCGTCCATTTCCAT	24	10.4569	4.28657	1.58191	0	0	45.8294	27.6383	26.1816	8.30385	3.03742					13112.m04157_intr1-sense
siR31603	AAGCAGAACCCGATGAGAAGCCAA	24	5.47411	3.38413	0	0	0	0	0	15.8484	7.73896	3.25438			13102.m03185_exon2-sense
siR31632	AAGCAGATCTCCTAAGCCAGTATG	24	0	0.225609	0	0	0	15.993	9.98051	5.32507	0	0	LTR/Gypsy:1
siR31634	AAGCAGATCTTCCAGGGCTCGTGT	24	2.38615	0.376015	0.439418	0	0	14.2733	11.6866	8.49475	1.18626	0.0723196	LTR/Gypsy:1
siR31739	AAGCAGTCACGCTAGGACCATCCG	24	0	0	0	0	0	0	26.7	0	0	0				13112.m04157_intr1-antisense
siR31740	AAGCAGTCACTCTCACAAGCTCTC	24	0	0	0	0	0	12.3817	0	0	0	0
siR31769	AAGCAGTGATCTGGTGTAGTTGTC	24	11.8606	0	0	0	0	77.6434	62.3569	33.0915	7.28705	1.15711					13108.m02607_intr6-sense
siR31785	AAGCAGTTGGAACTTGGAAGTAAA	24	50.5302	0	0	0	0	143.851	151.67	107.389	0	0
siR31804	AAGCATACTCTGAAGATTCATTCT	24	9.40423	11.3556	1.66979	0	0	18.1426	19.3639	19.2717	11.6932	5.42397						LOC_Os11g28370.1|13111.m02728|1000bp_UpstreamSeq|15869584..15870586
siR31831	AAGCATATCAGCCGTGGTAACTAA	24	2.73705	1.27845	0.263651	0	0	12.1237	10.9189	7.0367	2.25955	0.867836
siR31834	AAGCATATCAGTCGTGGTAACTAA	24	8.0708	7.89631	2.54862	0.686836	0	27.0849	29.6856	16.102	10.5069	5.20701
siR31849	AAGCATATGGTCTGGTGTAGGTGA	24	0	0	0	0	0	0	0	0	12.2016	0				13102.m03185_intr1-antisense
siR31912	AAGCATCGTAGGCAGTCAGCAACA	24	11.1588	7.7459	3.16381	1.28782	0	32.072	42.0546	16.6091	14.9695	4.4115
siR31920	AAGCATCTCAGCAACATCGTCTAG	24	9.19369	4.28657	0	0	0	15.3051	24.738	4.81792	6.0443	0						LOC_Os05g08780.1|13105.m00973|1000bp_UpstreamSeq|4831690..4830688
siR31938	AAGCATGAGAAGAACAGTGTAACA	24	0	1.88007	0	0	0	12.9836	0	12.4886	0	0
siR31988	AAGCATGGATTGTCGTAAATAGAG	24	0	0	0	0	0	0	15.184	0	0	0
siR32016	AAGCATGTTGCCAAGGTCGCCGAG	24	0	0	0	0	0	0	11.7719	0	1.24275	0			13101.m03783_exon1-sense
siR32089	AAGCCAAATTGTAGTATCGAAGAA	24	7.71989	7.44509	0	0	0	0	25.6764	0	0	4.19454						LOC_Os12g09060.1|13112.m00961|1000bp_UpstreamSeq|4735236..4734234
siR32321	AAGCCCCACCCTACCGGACAGTGC	24	0	0.451218	0	0	0	10.662	6.73898	4.81792	1.69466	0						LOC_Os01g20170.1|13101.m02191|1000bp_UpstreamSeq|11470443..11471445
siR32441	AAGCCGACGGCGCACTGGAGGATG	24	1.8247	0	0	0	0	20.0342	16.1224	0	0	0.216959				13109.m02429_intr1-antisense
siR32569	AAGCCTAAGACTGCATAGCCACTT	24	0	0	0	0	0	35.5973	0	26.7521	8.69927	0						LOC_Os12g09060.1|13112.m00961|1000bp_UpstreamSeq|4735236..4734234
siR32655	AAGCCTGAGAAGAAGAAGACGTAG	24	10.2464	6.76827	0	0	0	0	0	0	0	0
siR32682	AAGCCTGTCAGCTGCTCGTGGAAA	24	0	0	0	0	0	0	15.6958	4.62774	0	0
siR32772	AAGCGACCGAAGAACGTGTGATGT	24	3.93013	0	0	1.11611	0	0	4.9476	11.2841	5.93132	2.82047
siR32802	AAGCGACTTCAAGACCAATCCTTA	24	4.42139	3.98576	0.790953	0	0	14.4453	13.222	11.7912	5.76185	1.95263
siR32820	AAGCGAGCCGGCTGTATTGAACAA	24	0	0	0	0	0	0	0	0	17.9069	0
siR32875	AAGCGATGGCACTCCGATTAGTAT	24	5.89519	5.26421	0	0	0	48.065	27.3824	26.0548	0	0
siR32880	AAGCGATTGAGGTAGCTGGTTATG	24	15.4398	0	0	0	0	0	0	0	0	3.90526						LOC_Os11g20239.1|13111.m02050|1000bp_UpstreamSeq|11683762..11682760
siR33178	AAGCTAATGACGGAACCTCTTATG	24	0	0	0	0	0	0	0	50.3346	0	0					13101.m07604_intr4-sense
siR33217	AAGCTACGAATCGGACGTCAATAT	24	0	0	0	0	0	0	21.923	0	0	0
siR33302	AAGCTATGTAGTGGATATGTGTCT	24	0	0	0	0	0	0	21.4965	0	0	0
siR33320	AAGCTCAAGCGACTTCAAGACCAA	24	0	0	0	0	0	0	58.6035	0	0	0
siR33447	AAGCTCTAGTACCTCGTTCAGACC	24	7.50935	7.29469	0	0	0	34.6515	32.1594	23.0753	13.0489	4.99005			13108.m02607_exon3-sense		13108.m02607_intr2-sense
siR33502	AAGCTGAAGCTGGACTTGTTGTCG	24	2.10543	0	0	0	0	23.5596	25.9323	7.16349	1.29924	0
siR33524	AAGCTGACTGACCGGTGGTGGGCT	24	0	0	1.66979	0	0	68.2712	77.7968	0	9.71607	0						LOC_Os01g20170.1|13101.m02191|1000bp_UpstreamSeq|11470443..11471445
siR33533	AAGCTGAGCACGATGACGAATGAC	24	10.3868	0	0	0	0	68.4432	0	0	0	0
siR33657	AAGCTGGGAGAAGTGCTCTTTCTG	24	0	0	0	0	0	25.1933	19.7051	0	0	0.506237
siR33681	AAGCTGTCGACAAAAATCTTCCTC	24	12.0711	0	0	0	1.68881	0	5.20352	15.6582	15.9298	0				13101.m05930_intr4-antisense
siR33691	AAGCTGTGAGACAGATGAGCATAG	24	0	1.05284	0	0	0	10.748	7.59201	0	1.07329	0
siR33696	AAGCTGTGCGGTCATGTTCTCGGC	24	11.3693	5.64022	1.58191	0	0	26.0531	25.6764	9.12869	9.43362	1.30175
siR33702	AAGCTGTGTGGCAACCTGGGTTGG	24	0	0	0	0	0	56.5774	50.2438	0	0	0
siR33707	AAGCTGTTCATAGATACAATGTCG	24	0	1.80487	0	0	0	0	10.8335	4.31077	0	0
siR33728	AAGCTTACAACTGCTAACCGTCGA	24	35.8624	0	0	0	0	138.692	244.053	47.4819	36.4353	0				13108.m02607_intr3-antisense
siR33813	AAGCTTCTGAGAACATGTGTCTGC	24	6.17591	4.06096	1.0546	0.257563	0	26.913	20.8141	12.7421	7.0611	2.38655		13102.m02562_exon7-antisense
siR33913	AAGCTTTGAGTTGTATACACCTGA	24	0	0	0	0	0	19.0884	15.4399	9.76263	0	0
siR33932	AAGCTTTTGCGGAACTTTACCTTC	24	19.3699	16.6199	0	0	0	54.5998	46.4051	45.2631	0	9.61851
siR33949	AAGGAAAAGACCGAGCTACACCAA	24	0	0	0	0	0	88.9073	0	0	0	0						LOC_Os06g48550.1|13106.m05162|1000bp_UpstreamSeq|29375998..29377000
siR33953	AAGGAAAAGACCGAGCTGCACTAG	24	0	0.376015	0	0	0.0938228	23.4736	17.3166	6.59294	0	0.144639
siR33955	AAGGAAAATAGCATCGCACAATGT	24	3.6494	0	0	0	0	10.2321	10.1511	0	0	0						LOC_Os01g20170.1|13101.m02191|1000bp_UpstreamSeq|11470443..114714
siR33972	AAGGAAACTAGCACGTGCAACATT	24	0	0	0	0	0	0	23.5438	12.4886	0	0
siR33991	AAGGAAAGTTAAGGTGGTTTGTGC	24	0	0	0	0	0	0	13.222	7.16349	10.055	0			13112.m00961_exon1-sense		13112.m00961_intr1-sense
siR33994	AAGGAAATGCGGTTGAGTACCTAC	24	4.42139	1.57926	0	0	0	19.3464	16.7195	0	0	0			13108.m02607_exon4-sense
siR34017	AAGGAACATGAAGAGGATAGATCT	24	0	0	0	0	0	0	0	46.8479	140.826	0			13111.m00819_exon6-sense
siR34033	AAGGAACGTTGGTAGCAGCAGTAG	24	0	0	0	0	0	0	120.022	0	0	0	LTR/Gypsy:0
siR34039	AAGGAACTCCTTAGCAATATGACG	24	0	0	5.53667	0	0	0	186.729	0	0	0
siR34059	AAGGAAGACGGCTCTAGCCCTGGT	24	0	0	0	0	0	26.9989	0	0	0	0			13107.m00837_exon5-sense
siR34116	AAGGAAGTCTAGAGCAGGGCCAGG	24	0	0	0	0	0	11.9518	0	2.53575	0	0
siR34128	AAGGAATACATACTCTGCCGGTAC	24	28.7741	19.628	5.80032	0	0	133.103	133.159	105.487	46.5467	26.6859
siR34132	AAGGAATATGACAAGTGGGACTGC	24	0	0	0	0	0	0	0	0	27.1146	0
siR34169	AAGGAATTCGTCATCGAGCTGAAA	24	4.28103	2.4817	1.49402	0	1.31352	0	0	3.0429	11.6367	1.22943
siR34208	AAGGACAGTGTACGCGGTGTGGAT	24	0	0	0	0	0	0	17.2313	0	0	0
siR34328	AAGGACGGCAAGTTGGTGACCATA	24	25.7564	0	0	1.03025	0	0	0	2.85272	0	0
siR34407	AAGGAGAGGAAGAACTGCCGGTGT	24	29.1952	0	0	0	0	283.747	0	91.6039	0	0
siR34411	AAGGAGATCAAGTTGAAGGAGGCG	24	0	0	0	0	0	50.2146	0	0	0	0
siR34434	AAGGAGCAGTTTGTTAGTAGCTTG	24	0	0	0	0	0	25.4512	26.6147	11.1573	6.21376	0
siR34536	AAGGAGTGTGAAGATTGCATTTGG	24	0	1.20325	0	0	0	17.7987	0	0	3.72826	0
siR34584	AAGGATATATTGACAACAGATCGG	24	0	0	0	0	0	0	0	0	11.1283	0
siR34621	AAGGATCGAGGCAAGTTGTAAAAA	24	0	13.7621	0	0	0	0	0	0	25.9283	0	DNA/MuDR:0			13106.m02114_intr1-antisense
siR34658	AAGGATGAACCGCAGTGCGAGCGC	24	12.3518	0	0	0	0	0	0	0	0	0		13105.m03218_exon1-antisense				LOC_Os05g31370.1|13105.m03219|1000bp_UpstreamSeq|18168444..18169446
siR34784	AAGGATTGGTCTTGAAGTCGCTTG	24	5.19338	3.53454	0.96672	0.600981	0	13.1555	11.3454	3.0429	7.73896	1.73567
siR34791	AAGGATTGTGTCAGTGGTAGCTAG	24	0	44.0689	0	0	0	0	0	0	0	0
siR34838	AAGGCAAGATCTGACGGACAGAAG	24	0	6.09144	0	0	0	0	2.3885	3.93041	13.3878	0			13107.m00904_exon18-sense
siR34886	AAGGCACGTCCTCACGGTACTGAG	24	2.9476	0	0	0	0	0	11.2601	0	3.10688	1.22943
siR34893	AAGGCACTCTGGAATTATTGCATT	24	0	0	0	0	0	18.4865	0	0	0	0					13101.m02191_intr1-sense
siR34935	AAGGCAGTGGATGTGATGCACAAG	24	0	0	0	0	0	15.821	0	0	0	0
siR35222	AAGGCGTGAGCAGAGGTGGACTTA	24	0	0	0	0	0	15.821	0	0	0	0
siR35249	AAGGCTAGTTGGTGATCAGTCGCG	24	6.52682	3.68494	0	0	0	25.1073	26.6147	0	7.96492	0
siR35297	AAGGCTGAGAAATGCAGAGGATAT	24	0	0	0	0	0	0	0	12.3618	12.2581	0						LOC_Os08g44070.1|13108.m04780|1000bp_UpstreamSeq|27752592..27753594
siR35345	AAGGCTGTGTTCGTTGGAGAGGGT	24	0	11.8069	0	0	0	47.807	0	0	0	0
siR35434	AAGGGACATGTAGTCGGAATCGGG	24	0	0	0	0	0	20.7221	0	0	0	0
siR35633	AAGGGCGAACGCAACAAGAGGGTC	24	0	5.79063	0	0	0	0	40.7751	0	0	0
siR35782	AAGGGTAGGGGAGGACGCATCTGG	24	0	0.827232	0	0	0	28.8906	25.4205	0	0	0.578557							LOC_Os08g13430.1|13108.m01436|3-UTR
siR35878	AAGGTAAGCGAGCAACGACATGTA	24	0	0	0	0	0	0	6.65368	19.5886	0	0			13105.m03221_exon2-sense		13105.m03221_intr2-sense
siR35914	AAGGTACGAACAGATCGCGAGCAG	24	36.7046	0	0	0	0	0	0	0	29.6001	0			13101.m07147_exon1-sense
siR35920	AAGGTACTGGTATGGATAGATGGC	24	8.77261	0	0	0	0	17.1108	0	5.89561	4.18017	0
siR36032	AAGGTCACTTTGACTCAAATCGTT	24	11.5097	9.55078	0	0.515127	0	29.6644	47.4288	11.4109	15.8169	0						LOC_Os12g40000.1|13112.m04157|1000bp_UpstreamSeq|24697598..24696596
siR36040	AAGGTCAGCCTGCAGAATTAGCGG	24	0	0	0	0	0	0	0	24.0896	0	0
siR36070	AAGGTCCGTGAGAAGGTATTAACA	24	8.49188	5.71542	1.58191	0	0	22.1838	27.2118	14.8341	14.6871	3.18206
siR36103	AAGGTCGACTGCATCCCAAAGTAC	24	68.3561	52.6421	17.9283	0	0	192.948	200.805	118.736	100.945	23.9378				13101.m02191_intr2-antisense
siR36149	AAGGTGAAGAACAACGAGTGCACC	24	0	0	0	0	0	10.576	0	9.19208	0	0
siR36405	AAGTAAAAGATGTCATGAGCTTGC	24	3.57922	1.35365	0	0	0	25.4512	20.8994	14.5172	2.71146	0.578557		13108.m02607_exon7-antisense
siR36426	AAGTAAATCGATTAATCACGGCTG	24	0	0	0	0	0	0	37.3629	0	0	0
siR36465	AAGTAACTTGTAAGCTATAGGCAC	24	0	0	0	0	0	0	0	16.6725	0	0
siR36575	AAGTACATGCTCGACCGCCTTGGA	24	2.10543	1.35365	0	0	0	12.1237	14.331	4.62774	1.75115	0			13108.m02607_exon7-sense
siR36635	AAGTACGACGATGACCACAATCAA	24	0	2.10568	0	0	0	0	14.6722	0	0	0
siR36700	AAGTAGAAGTGCTCTAGAATCCGT	24	0	0	0	0	0	18.5725	0	0	1.58169	0				13101.m02191_intr1-antisense
siR36734	AAGTAGAGGCATCAGGACACTTTC	24	6.45664	0	0	0	0	0	0	0	13.8397	0					13102.m03185_intr3-sense
siR36838	AAGTAGGCAGGGCAAGTGGCTGAC	24	0	0	0	0	0	11.1779	0	0	0	0						LOC_Os06g23010.1|13106.m02474|1000bp_UpstreamSeq|13426643..13427645
siR36920	AAGTATACTCTTGATCTCACGTGC	24	28.5636	0	0	0	0	83.5763	85.1329	0	0	0
siR36921	AAGTATACTCTTGATTTTCCGTGC	24	0	7.5955	0	0	0	44.5396	33.439	19.3351	15.6474	0
siR37062	AAGTATGTAGATGTGTCTTGATCA	24	0	0	0	0	0	18.8305	18.6815	12.9957	0	2.09727
siR37338	AAGTCATCGGCGTAGAGAGAAGCA	24	0	0	0	0	0	0	18.9374	0	0	0	LINE/L1:0
siR37453	AAGTCCCCCTACCTCGTTGGATCA	24	0	0	0	0	0	26.2251	36.3393	0	0	0
siR37834	AAGTCTTGCCTTGGTCGCATCGGT	24	0	0	0	0	0	0	0	0	19.7711	0
siR37906	AAGTGAATTCTGGTATACGTGAGA	24	9.75514	0	1.58191	0	0	26.9989	29.9415	0	0	0
siR37945	AAGTGACTACAGAAGATATATTCA	24	8.21116	6.01624	0	0	0	9.80216	10.407	10.8403	6.49621	2.82047
siR37994	AAGTGATGAACAGGAACCCAATGA	24	0	0	0	0	0	0	0	0	10.6764	0
siR38004	AAGTGATGGGTAGCACGCCAACGA	24	0	0	0	0	0	0	0	22.8217	0	0
siR38371	AAGTGTAGAGGATAAACATGTATG	24	23.0895	11.9573	0	0	0	67.6693	65.6837	37.2755	19.8276	10.9203
siR38396	AAGTGTAGTCTCCTAGCAACGGGT	24	0	0	0	0	0	59.9308	0	25.2307	0	0
siR38476	AAGTGTGACGATGACGGTGGGTAC	24	0	0	0	0	0	0	0	0	11.2978	0						LOC_Os04g08500.1|13104.m00770|1000bp_UpstreamSeq|4585910..4586912
siR38611	AAGTTAGAGGACTCAGGCTTATAC	24	0	0	0	0	0	12.3817	0	10.2064	0	0	LTR/Gypsy:1
siR38761	AAGTTCTCGATCGACTGCAGGCAT	24	0	25.3434	0	0	0	0	0	0	0	0
siR38777	AAGTTCTGGAACATAGCAACTGCA	24	0	0	0	0	0	32.158	0	0	0	0
siR38830	AAGTTGAGATGGAGATGGATCGGA	24	0	0.150406	0	0	0	12.0377	0	0	0	0				13101.m02100_intr2-antisense
siR38868	AAGTTGCACTCGTCCGGATAGATC	24	0	0	0	0	0	0	0	0	18.6413	5.71325
siR39017	AAGTTTAATTCGGAGATTTATGCA	24	12.9835	0	0	0	0	0	0	0	0	0					13112.m04157_intr1-sense
siR39169	AAGTTTTGGAATGACGGACAATGG	24	0	0	0	0	0	22.4418	23.7144	12.1716	0	0
siR39441	AATAACCACGAAGCGGACGCCGAC	24	1.96506	0	0	0	0	0	14.0751	0	0	0
siR39733	AATAAGATTTGTAGTCATCGTCGA	24	0	0	0	0	0	0	31.477	0	0	0	LTR/Gypsy:1
siR39974	AATAATTAAGTTGATCGATCTGCA	24	21.7561	0	0	0	0	0	0	0	0	0
siR40319	AATACCCGACTGCGCTAAGACTGC	24	34.1079	20.5304	7.38222	2.66149	0	219.775	140.239	156.139	54.6246	29.3618
siR40414	AATACCGGGTATTGAATCTTCGTA	24	17.9663	0	0	0	0	57.2653	61.5892	34.8665	25.7589	0				13112.m00961_intr6-antisense
siR40494	AATACGAACCGCTCTAGACTGTAA	24	3.2985	1.65446	0.527302	0	0	13.8434	12.6249	11.0305	3.72826	1.66335
siR40529	AATACGATTTAGGGGGAAAGCATA	24	0	0	0	0	0	27.6868	23.2026	23.1387	0	4.55614
siR40555	AATACGGACCACAAGACGCAATGT	24	15.5801	0	0	0	0	0	0	0	26.5497	5.20701	DNA/Tourist:0
siR40786	AATAGAAAGGAACCACCGATGACG	24	0	0	0	0	0	0	0	40.6353	0	0	LTR/Gypsy:0
siR40826	AATAGACAAAAGGCTTATGCATCA	24	0	0	0	0	0	15.0472	0	0	0	0
siR40831	AATAGACAGCGTGTAGATCAGAGA	24	3.6494	2.40649	0.615185	0	0	7.05068	10.407	7.29027	4.80154	1.37407	DNA/En-Spm:0			13101.m02191_intr4-antisense
siR40884	AATAGAGGACATTGCATGACCATT	24	0	0	0	0	0	0	0	13.9466	0	0
siR40903	AATAGATCAACTGACGGTGTGTCC	24	0	0	0	0	0	0	0	0	53.4949	0
siR40922	AATAGATCTGATTTCCACGGCTGC	24	0	8.49793	0	0	0	24.4194	0	7.29027	0	0
siR40967	AATAGATGATGGCTTGCATTCTAG	24	0	0	0	0	0	0	12.2837	0	0	0				13108.m02607_intr1-antisense
siR41144	AATAGCGGACTTCTGCAGAAAGGC	24	5.61447	3.45934	1.84556	2.40393	1.40734	0	4.00927	10.5234	6.5527	3.03742
siR41200	AATAGGAAAATAGCTGCAGCCTAC	24	0	0	0	0	0	13.7574	11.1748	6.71973	0	0
siR41229	AATAGGATTTTAGTCAGGCCAGGG	24	0	0	0	0	0	0	0	0	0	10.3417
siR41237	AATAGGCCTTGTGAGAATTGGTAT	24	0	0	0	0	0	0	0	22.2512	0	0
siR41248	AATAGGCTTTTTCAGGTAGGATAA	24	0	5.26421	0	0	0	0	15.6105	7.79742	0	0				13108.m01397_intr4-antisense
siR41254	AATAGGGAGTGGAATTGATTTGGA	24	0	0	0	0	0	0	18.5962	0	0	0
siR41306	AATAGGTGGAGGATAACTAGTGCA	24	0	0	0	0	0	49.3547	0	0	0	0	DNA/MuDR:1				13106.m02114_intr1-sense
siR41376	AATAGTATGAGTGGAGGCTAAGGA	24	0	0	0	0	0	0	19.2786	0	0	0
siR41438	AATAGTCTAGAACACTGCAGGTGC	24	18.6681	12.3333	0	0	0	103.439	89.1422	57.1811	27.849	15.838
siR41770	AATATCACACGTTGGTCAGTTTGG	24	0	0	0	0	0	10.2321	0	6.27597	3.89772	0
siR41878	AATATCGAGACGAGCAGAAATCAG	24	0	0	0	0	0	0	0	14.327	0	3.47134
siR42020	AATATGCAGAAGTTGTGAAAAGTG	24	0	3.15852	0	0	0	16.079	0	12.1082	4.5191	0
siR42104	AATATGGATTCGTGTTGGGCCTTC	24	20.9841	11.4308	3.42746	0	0	77.8154	78.5646	29.9218	25.8719	6.14717			13105.m04596_exon2-sense
siR42187	AATATGTGGTCGACGGTTAGCAGT	24	0	0	0	0	0	0	0	5.45186	28.2444	0					13108.m02607_intr3-sense
siR42485	AATATTTTTTGCCGGACACATAAG	24	23.4404	15.943	0	0	0	58.9849	61.0773	31.2531	38.8643	6.79805
siR42562	AATCAAAGTTGAGATGGAGATGGA	24	0	0	0	0	0	0	0	0	24.8551	0				13101.m02100_intr2-antisense
siR42664	AATCAACTAGTAGACAAACATGCA	24	6.73736	4.28657	0.96672	0	0	17.5407	22.6054	13.6296	5.81834	4.12222
siR42704	AATCAAGAGGGTGAAGATTGCTGT	24	0	0	0	0	0	0	114.563	77.5305	0	0
siR42774	AATCAATCCCTGGTCGGCTGGTCC	24	0	0	0	0	0	0	36.1687	0	0	0
siR42874	AATCACCAAGGAAAAAGGCTCGCA	24	2.73705	0	0	0	0	0	11.516	0	6.10079	0
siR42965	AATCACGGCTGTTGATCGTTGATG	24	43.091	15.0406	3.07593	0	0	25.4512	44.2725	11.8546	20.5619	4.4115
siR42996	AATCACTAACACCGGCATGTTCTG	24	12.7027	0	0	0	2.72086	0	1.36486	6.9733	18.6413	0
siR43036	AATCAGAACTACAAGGCACATTAC	24	12.422	9.77638	0	0	0	0	0	20.286	21.2963	0						LOC_Os09g32750.1|13109.m03271|1000bp_UpstreamSeq|19535648..19536650
siR43127	AATCAGCCGGCTACGTTGGATATA	24	3.08796	2.18089	0	0	0	12.5536	11.3454	5.07149	3.67177	1.01247
siR43152	AATCAGCTTAGCAGAATAGAACGA	24	0	0	0	0	0	0	0	0	13.7268	0
siR43157	AATCAGGAAGGTGGCAATGATGAT	24	0	0	0.0878836	0	0	18.5725	0	0	0	0
siR43273	AATCATACTACCTGCAAGAGCTGC	24	7.29881	4.21137	0	0	0	32.7599	31.5623	16.7993	8.69927	3.76062					13106.m02474_intr2-sense
siR43861	AATCCCCAGCACAAGACGTAGATG	24	5.33374	0	0	0	0	25.7952	24.0556	25.7378	6.5527	0
siR44308	AATCCTCAGCATGAGACGTAGATG	24	5.19338	2.4817	0	0.343418	0	10.834	10.6629	4.43756	4.97101	2.09727							LOC_Os01g16060.1|13101.m01782|3-UTR
siR44486	AATCCTTAGCACGAGACGTAGATG	24	0	0	0	0	0	15.907	17.8284	0	0	0				13103.m05651_intr5-antisense
siR44671	AATCGACTGTTTATCCATACCTAT	24	5.82501	3.53454	0	0	0	12.0377	14.4163	13.8198	0	0	LTR:0
siR44783	AATCGCGACGTAATAGGCCCATAT	24	2.24579	1.20325	0	0	0	11.8658	10.1511	6.14919	4.63208	1.44639
siR44845	AATCGGCCATAGCAGAGTACAATG	24	5.47411	3.15852	0	0	0	20.7221	19.3639	13.7564	5.47941	1.01247
siR44989	AATCGTTCGAACGTGTGTCGTCGC	24	0	0	0	0	0	0	0	5.38846	12.0321	0						LOC_Os09g27200.1|13109.m02643|1000bp_UpstreamSeq|16533787..16534789
siR45104	AATCTACTACAGCATCTTAGGCGG	24	1.89488	1.27845	0.790953	0	0	10.834	9.38339	5.38846	2.71146	1.66335
siR45162	AATCTAGCGATCTGAAGACATAAG	24	7.50935	6.54266	0	0	0	0	0	0	14.4611	0
siR45298	AATCTCAGAACTTCGAAGACGATG	24	0	0	0	0	0	78.9332	95.1987	80.7635	27.51	0	LTR:1
siR45378	AATCTCCGACACTGAAGACCGTGA	24	21.8262	0	0	0	0	0	0	0	35.1925	0			13111.m00819_exon1-sense
siR45414	AATCTCGGCGACAGAGCGACGGCC	24	9.96568	0	0	0	0	0	24.4821	0	0	0
siR45582	AATCTGATCATGAAAGCTGGAAGA	24	0	0	0	0	0	197.247	0	0	0	0
siR45625	AATCTGCCGCTGCTAGAAGAAGTA	24	0	0	0	0	0	0	0	15.2779	0	0
siR45682	AATCTGGGACTAAAGATGGGTATC	24	0	0	0	0	0	0	65.2572	0	0	0	DNA/En-Spm:0
siR45741	AATCTGTCAAAGTAGAATGGAGGA	24	0	0	0	0	0	0	0	47.9256	0	0			13105.m04595_exon2-sense
siR46078	AATCTTTGATGTTTGGTTGGTTGC	24	2.9476	3.53454	0.439418	0	0	17.1108	13.9045	2.78932	4.40612	1.51871						LOC_Os01g16630.1|13101.m01861|1000bp_UpstreamSeq|9436432..9437434
siR46298	AATGAATCAGAACTGCAAGCTTCA	24	10.106	7.14428	3.07593	2.66149	0	0	17.5725	26.0548	14.9695	6.79805
siR46347	AATGAATTGAAGGATGGTGATCGA	24	0	0	0	0	0	11.4359	0	0	0	0
siR46355	AATGACAACAAAGGATATGACTGA	24	0	0	0	0	0	185.639	146.637	0	0	8.02748					13102.m02562_intr6-sense
siR46482	AATGACGAATTAGCACCAGACAAC	24	0	0	0	0	0	56.2335	0	0	0	0
siR46483	AATGACGACAAAGGATATGGCTAA	24	0	0	0	0	0	98.0216	83.6828	41.2059	0	0					13102.m02562_intr2-sense
siR46487	AATGACGACAGCTGCAGCACCGCC	24	8.28134	0	0	2.31807	3.56527	0	7.2508	12.8055	11.2413	6.43645
siR46554	AATGACTCCAGCAGGACTGCCATG	24	0	0	0	0	0	35.5113	42.5665	0	0	0
siR46561	AATGACTGATGTGCACATTTCTAT	24	10.6675	0	0	0	0	0	18.255	15.9752	0	0
siR46682	AATGAGGGCTTGCACATCAGATGA	24	0	4.51218	0	0	0	0	10.2364	0	0	0
siR46811	AATGATCTCAAGCACATAGGCTAC	24	10.878	0	0	0	0	0	0	0	0	0
siR46816	AATGATCTGACCGTTGGATTTTCA	24	0	0	1.58191	0	0	8.42642	13.0514	4.62774	8.19087	0					13112.m04157_intr1-sense
siR47071	AATGCAGAACAGGGAACAGTAATG	24	0	0	0	0	0	82.6305	70.9725	74.234	15.6474	7.95516
siR47078	AATGCAGATGCTTGGGACGGTGAT	24	0	0	0	0	0	0	0	77.2769	71.6842	0
siR47085	AATGCAGCAGGACAGTGTCGTAGT	24	0.84217	0.526421	0	0	0	10.662	8.95687	5.51525	1.63817	0.216959					13106.m02474_intr2-sense
siR47335	AATGCCATGTGCTCGATCTCGTTA	24	2.73705	0.902435	0.263651	0.0858545	0	6.27682	11.0895	1.20448	2.88093	0.433918
siR47424	AATGCCGGTTCTGTAGCAGGTGTG	24	0	0	0	0	0	0	0	0	0	20.5388
siR47505	AATGCGAGAGAGAAGACTAGTAGA	24	0	0	0	0	0	33.3617	0	0	0	0
siR47549	AATGCGTAACTTTCCGATCGTCAC	24	18.9488	0	0	0	0	0	0	6.08579	14.6871	0
siR47560	AATGCGTCGTGAACCAACAGAGAG	24	4.70212	0	0.615185	0	0	10.748	17.3166	7.10009	4.5191	0.795516
siR47850	AATGGAAAATTCGTTGAAGTCATG	24	0	11.3556	0	0	0	0	0	0	22.8215	0				13106.m02474_intr1-antisense
siR47972	AATGGACTTCTGCGATGCGAAGCT	24	6.597	0	0	0	0	8.77036	11.516	3.16968	4.85803	1.15711
siR47975	AATGGAGAAGGGCTCGTCGTCGAC	24	2.9476	0	0	0	0	0	0	11.1573	1.5252	0			13105.m03221_exon3-sense
siR48011	AATGGATAGAAGAGGAGGATGCGT	24	0	0	0	0	0	24.8493	0	7.35367	0	0
siR48104	AATGGCATTGACTGGTATGAATAA	24	0	0	0	0	0	0	3.41214	10.9037	0	4.12222						LOC_Os09g32750.1|13109.m03271|1000bp_UpstreamSeq|19535648..19536650
siR48267	AATGGGTGTGCAGCAGGAGTGTAG	24	14.2467	0	0	0.944399	0	0	23.032	48.4328	8.75576	0			13101.m01138_exon3-sense
siR48289	AATGGTAGAAGGAGACAAAATTGA	24	0	7.14428	0	0	0	0	0	0	12.9359	0
siR48304	AATGGTAGGAGAAGGACACATTGG	24	0	0	0	0	0	0	0	0	12.484	2.67583	LINE/L1:1		13108.m01378_exon2-sense		13108.m01378_intr2-sense
siR48307	AATGGTAGGCTGTGGGTGTAAGGT	24	10.6675	0	0	0	0	30.1803	0	0	0	0	LTR/Gypsy:1
siR48376	AATGGTCTGATACTAACCGGAGTG	24	0	0	0	0	0	17.6267	0	0	0	0
siR48386	AATGGTGAAGACGAAGAGGGATAT	24	0	0	0	0	0	37.7469	25.5058	0	0	0
siR48426	AATGGTGTAGCAGAGGACTTCAAG	24	0	0	0	0	0	0	0	50.081	0	12.2943						LOC_Os06g05760.1|13106.m00570|1000bp_UpstreamSeq|2605882..2606884
siR48427	AATGGTGTAGCGGAAGACTTCAGG	24	0	0	0	0	0	0	0	12.3618	0	0						LOC_Os07g12620.1|13107.m01307|1000bp_UpstreamSeq|7212657..7213659
siR48588	AATGTAGAGCAACAGGGTGGTGGC	24	6.17591	0	0	0	0	0	0	0	28.5833	0
siR48596	AATGTAGCAAACCAGTGACCGCAG	24	0	0	1.31825	0	0	0	0	15.2145	0	0
siR48620	AATGTAGGTTTTAGAGGGGGTATA	24	3.57922	1.57926	0	0	0	16.8528	0	7.41706	2.9939	0.433918
siR48641	AATGTAGTTGTGGTGGTGTAATGT	24	0	0	0	0	0	11.9518	5.45943	5.13489	0	0						LOC_Os06g48550.1|13106.m05162|1000bp_UpstreamSeq|29375998..29377000
siR48752	AATGTCAAGATGGAGCAAATGGGG	24	0	0	0	0	0	0	14.2457	0	0	0			13105.m01987_exon3-sense
siR48786	AATGTCAGGGAAGGGGTAAGATTG	24	9.61478	8.19712	0	0	0	46.3453	33.1831	17.1163	16.6642	3.47134				13108.m02607_intr4-antisense
siR48909	AATGTCGGACTGTTCAGTGTCATC	24	8.70242	5.56502	0.790953	0	0	14.8752	18.8521	6.27597	8.64278	2.09727			13102.m03554_exon2-sense		13102.m03554_intr1-sense	LOC_Os02g32780.1|13102.m03553|1000bp_UpstreamSeq|19464461..19463459
siR48974	AATGTCTGAAGTCTGAACCAGAGG	24	28.4232	14.2886	0	0	0	89.2513	113.283	97.1191	29.0352	19.6709
siR49130	AATGTGGGTTGTGTTGCTAGGCTA	24	0	0	0	0	0	0	34.5479	0	0	0
siR49531	AATTAAATTGGAGCCGGTAGTTGA	24	4.84248	0	0	0	0	0	13.5633	8.24118	2.82444	0	DNA/Tourist:0
siR49591	AATTAAGGGACTAAATATAAGTAA	24	0	7.97151	0	0	0	0	0	0	13.2749	0
siR49637	AATTAATGCAGCAGGACAGTGTCG	24	0	0	0	0	0	11.3499	10.1511	5.51525	0	0					13106.m02474_intr2-sense
siR49737	AATTACCAAGTAGATGACTGTGAA	24	122.325	0	0	0	0	363.368	0	0	0	0
siR49914	AATTAGGCGTGTAGGTGTGGCTGA	24	0	0	0	0	0	9.02831	12.7955	0	0	0	LTR/Gypsy:1
siR49968	AATTAGTGGTCGAAATTGGGTTTA	24	0	0	0	0	0	14.7032	11.8572	4.31077	5.42292	0
siR50231	AATTCAGAAGTGAGAGCAAATGGA	24	17.4048	6.16664	0	0	0	33.8776	32.5006	20.4762	0	0
siR50328	AATTCATTGCTCTGAGGACAATCT	24	0	3.68494	0	0	0	10.834	13.9045	7.9876	0	0
siR50569	AATTCGGTTTGTCAGACGGATGGA	24	0	48.1299	0	0	0	192.346	232.537	0	0	0
siR50837	AATTGAACACAATCGTCATGCATG	24	7.79007	4.13616	0.96672	0	0	23.9895	0	14.8341	0	3.76062
siR50848	AATTGAAGAACCTATCCGAAGTCG	24	0	0	0	0	0	0	16.7195	0	0	0
siR50852	AATTGAAGACCGCGGAAGAGTTGA	24	4.56176	2.78251	0	0	0	0	5.97125	12.6787	9.82904	0
siR50976	AATTGATCTCAGAAGGCAAGTAAT	24	8.70242	9.17476	0	2.57563	2.34557	0	1.87668	5.89561	14.7436	3.61598		13111.m00819_exon6-antisense
siR50985	AATTGATGGAAGGAAAATAGCATG	24	0	0	0	0	0	28.6326	0	0	0	0		13101.m02191_exon2-antisense
siR51270	AATTGGCGACGACGAGCAACCCAA	24	0	0	0	0	0	0	33.9508	24.7869	0	0
siR51329	AATTGGTTTTGATTGGGTAGCTAG	24	3.78977	0	0	0	0	16.9388	13.222	4.43756	2.65497	0.433918
siR51402	AATTGTATTGATCTGTGGAGATAA	24	188.716	122.581	32.0775	0	0	232.328	242.091	92.8083	196.411	0	LTR:0					LOC_Os01g20170.1|13101.m02191|1000bp_UpstreamSeq|11470443..11471445
siR51507	AATTGTTACAGGGAGGCTAGAGCA	24	0	0	0	0	0	120.463	0	0	0	0
siR51727	AATTTCAGGGCAGCGTATTCGACT	24	0	0	0	0	0	0	4.777	12.3618	18.4718	0
siR52185	AATTTTCATCTGTCGTCATCATTC	24	0	0	0	0	0	13.0695	0	0	0	0
siR52437	ACAAAACATTGTGATCCTCCTGAC	24	60.2853	35.3454	0	0	0	0	0	0	61.3468	0				13101.m02191_intr1-antisense
siR52580	ACAAAATGAATGACGGTGATCTCG	24	16.5627	9.40037	9.57931	0	3.18998	0	13.9898	7.9876	21.5787	3.76062
siR52597	ACAAAATTACAAGGTCGACTGCAT	24	0	0	0	0	0	0	123.008	0	24.2337	0				13101.m02191_intr2-antisense
siR52730	ACAAACCGAGTCTGGACAGTGGCA	24	0	0	0	0	0	86.5858	103.9	0	0	11.4988
siR52752	ACAAACGAGCAGAAACAACGAGTA	24	4.07049	0	0	0	0	17.9706	0	13.1859	0	0
siR52761	ACAAACGATAGAGAGATGACGGTT	24	0	0	0	0	0	0	0	15.2779	0	0
siR52788	ACAAACGGGACATGGGGGCGGTGG	24	0	0	0	0	0	10.662	0	0	0	0			13105.m01987_exon3-sense
siR52862	ACAAACTTCTAGCTCTTCGGATCC	24	5.82501	4.21137	2.81228	1.80294	1.31352	0.0859839	10.2364	14.327	8.07789	4.12222			13105.m03221_exon3-sense
siR52981	ACAAAGGCCAGAAGAAATCAGAAG	24	6.66718	4.51218	2.02132	0	0.750583	0	2.72971	18.6377	12.6535	7.08732
siR53193	ACAAATCTGTTGACCGCTTTCCGT	24	0	0	0	0	0	0	0	10.8403	7.45652	0	DNA/Tourist:1					LOC_Os02g14929.1|13102.m01666|1000bp_UpstreamSeq|8344098..8343096
siR53233	ACAAATGGAAAGGAGGGAGCCGGT	24	1.12289	0	0	0	0	16.251	3.07093	0	0	0.216959						LOC_Os12g40000.1|13112.m04157|1000bp_UpstreamSeq|24697598..24696596
siR53236	ACAAATGGTAGACGATGAGAAGAT	24	20.563	0	3.33958	0	0	0	44.4431	34.6129	22.652	0
siR53415	ACAACACACGGCACCTGAATGACG	24	0	2.18089	0	0	0	29.4925	23.2879	0	0	1.66335
siR53509	ACAACAGATCGGCATACCTCGCAA	24	35.9326	0	0	0	0	37.489	38.3013	0	0	0
siR53523	ACAACAGGAAAGAGCGACGGTATC	24	0	0	0	0	0	112.123	0	50.9051	0	0
siR53955	ACAACGAGATACTAGGGCATCAAC	24	0	0	0	0.429272	0	0	12.1131	0	0	0	DNA/MuDR:1
siR53965	ACAACGAGTAGAATGAGAGGTGGA	24	0	0	0	0	0	231.727	0	0	0	18.5138
siR54008	ACAACGCCGAGAACATGACCGCAC	24	12.4922	7.36989	1.75767	0	0	77.4715	60.5655	36.6415	15.1955	7.88284
siR54108	ACAACTACACCAGATCACTGCTTC	24	2.03524	1.80487	0.351534	0	0	11.1779	8.10384	8.62154	2.20306	1.08479				13108.m02607_intr6-antisense
siR54259	ACAACTGCTAACCGTCGACCACAT	24	8.98315	5.71542	1.58191	0	0	52.9661	37.7042	23.2021	19.0932	4.99005				13108.m02607_intr3-antisense
siR54331	ACAACTTTGACCCATGGGAGATTC	24	0	0	0	0	1.97028	0	0	0	10.3374	0
siR54469	ACAAGACGACACGGTGAAAGGCAG	24	7.86025	4.88819	0	0	0	13.9294	8.35975	5.07149	11.0718	0	LTR/Copia?:1
siR54515	ACAAGACTTTTAGACCCAAGATGT	24	0	0	0	0	0	0	26.7	18.194	0	0
siR54540	ACAAGAGCGTAGTGGGTGAGCATG	24	0	0	0	0	0	56.3194	0	0	0	0
siR54623	ACAAGATGGGAGACAAGTATCTAA	24	0	0	0	0	0	15.4771	0	14.4538	0	0
siR54761	ACAAGCGAAAACAGATACTTTGAT	24	9.47441	0	0	0	0	0	17.9137	0	0	0
siR54789	ACAAGCGTGGCACGAACCAAACAG	24	35.1606	0	0	0	0	0	0	85.1377	0	0	DNA/Tourist:1					LOC_Os09g32750.1|13109.m03271|1000bp_UpstreamSeq|19535648..19536650
siR54851	ACAAGGAACATGAAGAGGATAGAT	24	0	0	0	0	0	0	0	0	0	16.7782			13111.m00819_exon6-sense
siR54873	ACAAGGAGATTATTTGAGCCAGTG	24	0	0	0	0	0	0	0	0	10.3374	0							LOC_Os01g16060.1|13101.m01782|3-UTR
siR54957	ACAAGGTCGACTGCATCCCAAAGT	24	26.6687	17.4471	0	0	0	104.728	99.4639	63.9642	31.4078	9.69083				13101.m02191_intr2-antisense
siR55105	ACAAGTGATTTGATAGCGCCGCCT	24	0	0	0	0	0	0	0	16.1654	0	0
siR55191	ACAAGTTGGTGTCATTGTCGGTGC	24	0	0	0	0	0	0	40.9457	15.1511	0	0
siR55192	ACAAGTTGGTGTCATTGTCGGTGT	24	0	0	0	0	0	0	22.3495	4.69113	0	0
siR55310	ACAATAGACAGCGTGTAGATCAGA	24	0	0	0	0	0	0	31.1358	0	0	0	DNA/En-Spm:0			13101.m02191_intr4-antisense
siR55408	ACAATATTTCTGACGGCTTCACAA	24	19.1594	11.8069	3.69111	0	0	6.96469	6.56837	2.09199	16.2123	1.08479
siR55556	ACAATCGCAGTTGGGCTCGCATGA	24	7.43917	0	0	0	1.68881	0	11.7719	14.5805	9.60309	0
siR55777	ACAATGGATAGAAGAGGAGGATGC	24	0	2.6321	0	0	0	0	18.3403	10.7769	0	0
siR55829	ACAATGTCGACGAGGAGGAGGATG	24	0	0	0	0	0	0	0	18.8913	0	0			13106.m05162_exon3-sense
siR55937	ACAATTGATCTCAGAAGGCAAGTA	24	51.5127	47.2275	0	12.4489	0	0	0	34.4862	74.2262	23.2869		13111.m00819_exon6-antisense
siR55965	ACAATTGTTACAGGGAGGCTAGAG	24	0	2.78251	0	0	0	22.0979	16.8048	10.0796	0	0
siR55991	ACAATTTGGTTGTGTGGTAACTGT	24	0	0	0	0	0	23.4736	0	0	0	0
siR55996	ACAATTTTACACCAAGTGGGACTG	24	0	0	0	0	0	0	18.0843	0	0	0
siR55997	ACAATTTTACACCGAGTGGGACTG	24	0	0	0	0	0	17.1968	0	0	0	0
siR56040	ACACAAACGATAGAGAGATGACGG	24	0	0	0	0	0	38.5208	0	0	0	0
siR56201	ACACAAGATGAAGAACTACCCAAG	24	0	0	0	0	0	0	62.7834	0	0	0					13108.m01648_intr1-sense
siR56205	ACACAAGATTGGCTCAGCTTGGAC	24	0	0	0	0	0	0	0	10.46	0	0	DNA/MuDR:0			13106.m02114_intr1-antisense
siR56683	ACACACTACCAGGATACTCGCAGA	24	0	2.70731	0	0	0	16.7669	0	14.4538	0	0
siR57523	ACACCAGAACGATGGGACGGATGA	24	0	0	0	0	0	12.7256	13.1367	4.69113	0	0	LTR/Gypsy:0					LOC_Os08g25410.1|13108.m02607|1000bp_UpstreamSeq|15459622..15458620
siR57814	ACACCGACGGGCTTAAATAGGTGG	24	12.2115	5.94103	1.93344	1.63124	1.68881	0.257952	7.67732	12.1082	17.1726	3.10974						LOC_Os09g27200.1|13109.m02643|1000bp_UpstreamSeq|16533787..16534789
siR57861	ACACCGGATCGAGAAGAAGGGCGA	24	0	0	0	0	0	114.015	102.876	46.9113	0	0
siR58098	ACACCTTAGGCTCCCATCAGATGG	24	3.22832	1.65446	0.527302	0	0	12.8116	11.2601	7.41706	3.72826	1.15711
siR58237	ACACGACTGTTGGGTATAAAATGT	24	5.68465	0	0	0	0	0	0	12.3618	0	0					13107.m00953_intr2-sense
siR58251	ACACGAGAGGCGAAAGAAGTAGGC	24	4.63194	0	0.615185	0	0	16.079	0	15.785	5.08399	0				13105.m00973_intr1-antisense
siR58259	ACACGAGCTGCACGAGATCCTGGT	24	15.5801	0	5.44878	0	0	0	0	0	21.0703	0						LOC_Os10g04930.1|13110.m00410|1000bp_UpstreamSeq|2409219..2408217
siR58296	ACACGATTAACGAGGATTGGTGTA	24	0	9.17476	0	0	0	0	0	0	17.455	0
siR58349	ACACGCATTGGAGAGACATAAACA	24	0	0	0	0	0	0	0	27.2593	0	0
siR58495	ACACGGCACCTGAATGACGGATTA	24	0	0	0	0	0	0	76.7732	0	0	0
siR58732	ACACGTGTGGAGAGAAGGTGCCTA	24	0	0	0	0	0	11.0059	0	0	0	0
siR58765	ACACGTTGGTCAGTTTGGTAAAGT	24	3.43886	0	0	0	0	10.49	0	0	0	0
siR58871	ACACTACTCAACTGCATACATCTG	24	0	0	0	0	0	10.0601	6.65368	2.9795	0.90382	0.361598
siR58885	ACACTAGAGACTGCAAGATAAGGA	24	0	0	0	0	0	0	26.1882	14.1368	5.42292	0					13112.m04157_intr1-sense
siR59082	ACACTCTAGTAGTTCTTTCGTCTT	24	0	0	0	0	0	0	22.4348	0	0	0		13110.m02649_exon7-antisense
siR59112	ACACTGAAAGAAAAAAGAAGATGT	24	8.35152	0	0	0	0	0	20.6435	0	0	0				13101.m02191_intr1-antisense
siR59117	ACACTGAACAGTCCGACATTGAAG	24	8.35152	0	0.790953	0	0	47.2911	0	23.3923	10.3374	0		13102.m03554_exon2-antisense		13102.m03554_intr1-antisense		LOC_Os02g32780.1|13102.m03553|1000bp_UpstreamSeq|19464461..19463459
siR59144	ACACTGATGGAAGCAAGGAGCAAA	24	9.47441	0	0	0	0	0	31.0505	0	0	0
siR59377	ACACTTATTGATGGCATTTCTGGG	24	0	0	0	0	0	0	11.4307	0	0	1.37407	DNA/MuDR:1
siR59657	ACAGAACCTTCCAACCAGACCTGC	24	6.31628	0	0	0	0	43.5938	0	0	0	0
siR59665	ACAGAACTACAGAAGCAAGGATAG	24	0	0	0	0	0	36.4572	28.4914	19.9056	0	1.01247						LOC_Os05g03790.1|13105.m00371|1000bp_UpstreamSeq|1680989..1681991
siR59667	ACAGAAGAAAATAGAACAGCAACA	24	8.21116	7.97151	0	0	0	0	1.70607	0	11.1848	0				13111.m00819_intr3-antisense
siR59674	ACAGAAGAGGACGCAGGCACCAGG	24	0	0	0	0	0	0	0	11.601	0	0
siR59680	ACAGAAGAGTGAGGGCTAAGATGA	24	0	0	0	0	0	16.5949	0	0	0	0
siR59730	ACAGAATGGTAGAAGGAGAGTAGG	24	3.57922	0	0	0	0	19.0884	0	0	0	0
siR59750	ACAGACAAGCCAACGAAGACCTGA	24	15.9311	5.64022	0	0	0	0	0	67.3241	17.9634	14.3193
siR59751	ACAGACAAGCGACCGAAGAACGTG	24	0	0	0	0	2.25175	0	0	42.5372	0	5.71325
siR59785	ACAGACAGATAACATACCTTGAAC	24	15.4398	9.02435	2.72439	2.57563	0	0	4.52109	15.9118	11.9191	4.7731		13103.m07097_exon9-antisense		13103.m07097_intr9-antisense
siR59885	ACAGACGACGATTACTACTGGTGG	24	0	0	0	0	0	0	24.738	0	0	0
siR60169	ACAGATCGGCATACCTCGCAACCG	24	7.43917	0	0	0	0	0	10.0658	0	3.61528	0
siR60180	ACAGATCTATCATGAGGACAGAGG	24	2.73705	1.88007	0	0	0	11.6938	14.5869	5.89561	0	0
siR60212	ACAGATGACTAGTACTACAAATGA	24	10.7377	0	0	0	0	22.3558	0	12.1716	0	0
siR60367	ACAGCAGAAATTTAGGAATGTAGA	24	0	0	0	0	0	12.2957	0	0	0	0
siR60404	ACAGCATCGTCACCGCTTACGGCC	24	60.2152	27.5995	8.87625	0.257563	0	39.1227	33.3537	16.2922	40.7284	2.31423
siR60681	ACAGCTCGGTAACTACATGTTCAA	24	8.28134	0	0	0	0	28.6326	19.0227	11.0939	8.07789	0						LOC_Os06g48550.1|13106.m05162|1000bp_UpstreamSeq|29375998..29377000
siR60810	ACAGGAACATGAGAGGAGGCAGCC	24	0	0	0	0	0	34.6515	0	0	0	0
siR60813	ACAGGAACTGCATGCATTGGAACT	24	0	0	0	0	0	17.0248	0	0	0	0						LOC_Os01g37580.1|13101.m03823|1000bp_UpstreamSeq|21008518..21009520
siR60820	ACAGGAAGTAGCATGAGTAGAGTC	24	0	0	0	0	0	29.0626	21.4112	0	1.69466	0			13112.m00961_exon8-sense
siR60886	ACAGGAGGGTAGGCATTGTGTAGC	24	0	0	0	0	0	47.807	25.5911	10.6501	0	0
siR60888	ACAGGAGGTAGGCAAAGTTGGTAA	24	0	0	0	0	0	172.054	0	0	20.6749	0
siR60951	ACAGGCATAGTAGAAAAAACCGGA	24	66.3911	0	0	0	0	155.717	186.132	129.26	49.9926	0
siR60960	ACAGGCATGAGGAGGTAGGTAGGG	24	1.61416	0	0	0	0	33.9636	0	5.83222	0	0					13106.m05162_intr1-sense
siR60965	ACAGGCATGTACACATCCCCACTT	24	0	0	0	0	0	14.4453	0	4.94471	0	0				13106.m05162_intr2-antisense
siR61133	ACAGGGTGTTTGACGAAATGCTGA	24	4.28103	3.08332	0	0	0	11.8658	13.8192	5.19828	4.06719	0						LOC_Os06g13420.1|13106.m01477|1000bp_UpstreamSeq|7380891..7379889
siR61154	ACAGGTAGAAGTCGAACTCACTAG	24	9.26387	0	0	0	0	0	0	20.4762	0	0		13107.m00904_exon19-antisense
siR61410	ACAGTCAGGAGGATCACAATGTTT	24	4.63194	3.98576	0	0.171709	0	20.0342	13.7339	6.21258	8.36034	1.37407					13101.m02191_intr1-sense
siR61440	ACAGTCCGACATTGAAGCCGAGCA	24	14.3169	6.91867	0	0	0	0	70.8019	43.4247	15.7604	0				13102.m03554_intr1-antisense		LOC_Os02g32780.1|13102.m03553|1000bp_UpstreamSeq|19464461..19463459
siR61463	ACAGTCGAAGAGGAAACGTGAAGG	24	0	0	0	0	0	45.2275	0	0	0	0
siR61540	ACAGTGAGTGGGGGCAAATGCGGA	24	0	0	0	0	0	14.1014	9.21278	3.23308	0	0
siR61674	ACAGTTGATTTGCGCGGACCATGG	24	14.5976	0	1.14249	0	0	73.7742	61.5892	18.6377	7.90843	0						LOC_Os01g16630.1|13101.m01861|1000bp_UpstreamSeq|9436432..9437434
siR61815	ACATAACGGAGCAACTGACAGTGT	24	17.0539	0	5.00937	0	0	0	0	0	18.8108	0
siR62285	ACATAGACTTCAGCACGACACTAC	24	10.2464	3.15852	0	0	0	33.7917	25.9323	0	5.36643	1.51871
siR62327	ACATAGCTTATGTAGGTAGTAGGG	24	0	0	0	0	0	23.1297	0	0	0	0
siR62643	ACATATTGTAGCTGATCAAGAGAC	24	0	0	0	0	0	0	0	18.7645	0	0
siR62810	ACATCACGATCAATCAGGAACTGT	24	2.17561	1.72967	0.527302	0.171709	0	5.58895	10.1511	5.83222	2.42902	0.940155
siR62837	ACATCAGATTTGTGAAGCCGTCAG	24	7.01808	2.85771	0	0	0	16.3369	18.6815	10.143	5.19697	2.45887
siR63430	ACATCGACGTTGCATACCTCTTAA	24	3.43886	0	0.263651	0	0	12.4677	10.0658	8.49475	3.84124	1.66335	LTR/Copia?:0
siR63563	ACATCTAGACGCAATGGGAGGACG	24	0	0	0	0	0	14.9612	0	0	0	0
siR63914	ACATGACATAGTAAGACAAAAGGT	24	0	0	0	0	0	36.5431	0	0	16.3253	0					13107.m00837_intr4-sense
siR63930	ACATGACCACTCGACAGAAGAGCA	24	1.33344	1.42886	0.615185	0	0	13.9294	10.6629	7.0367	2.20306	0
siR64073	ACATGATTTATTGATTAGGACTAA	24	0	0	0	0	0	28.2887	0	0	0	0
siR64364	ACATGCGCGGCACTAGAAGGGTAG	24	0	0	0	0	0	0	0	10.6501	0	0
siR64411	ACATGCTAGATACTCAGGATGGAG	24	0	0	0	0	0	0	0	0	19.3756	5.20701
siR64412	ACATGCTAGATTGAACTGTGGTAT	24	0	0	0	0	0	10.2321	0	0	0	0					13105.m04595_intr2-sense
siR64508	ACATGGAAGCAAGCATACTCTGAA	24	18.6681	0	0	0	0	36.0272	0	0	15.5344	6.14717						LOC_Os11g28370.1|13111.m02728|1000bp_UpstreamSeq|15869584..15870586
siR64542	ACATGGATGCAGAGAAGACAAAGG	24	0	0	0	0	0	0	0	19.5253	2.48551	0	DNA/En-Spm:1		13101.m02191_exon5-sense		13101.m02191_intr4-sense
siR64674	ACATGTAACAAAGATAGCAGGACG	24	0	0	0	0	0	171.968	141.604	0	0	0
siR64698	ACATGTACGTACCCTGATCGGCGG	24	0	2.03048	0	0	0	6.79273	15.3546	3.93041	0	0.506237
siR64735	ACATGTAGTTACCGAGCTGTTCCA	24	0	0	0	0	0	0	10.5776	0	0	0
siR64895	ACATGTGTAGAGGTCAGGTAATGC	24	1.05271	0.376015	0	0	0	15.5631	8.53035	3.67683	0.621376	0			13102.m02562_exon2-sense		13102.m02562_intr2-sense
siR64929	ACATGTTCGAAGGTGGGCCATGGG	24	0	0	0	0	0	11.5218	0	0	0.677865	0
siR64955	ACATGTTGTTGGTGGCTTGTTGGT	24	5.1232	2.4817	0	0	0	18.0566	16.2077	6.52955	3.10688	0
siR65152	ACATTATCTTGTTCGACTGGTGGC	24	11.0184	0	0	0	0	0	0	15.6582	12.0886	0
siR65212	ACATTCAGACCCTACAATCACTAA	24	4.7723	3.38413	0.527302	0	0	10.1461	12.4543	7.79742	5.36643	2.31423
siR65399	ACATTGACGAGTACAAAAGACATA	24	0	0	0	0	0	10.404	10.4923	0	0	0
siR65502	ACATTGTAGCGTGACATACCCAAC	24	0	0	0	0	2.15792	0	9.7246	0	27.51	0
siR65565	ACATTGTGTGAGCGGTAAAATGAC	24	46.2492	0	0	0	0	0	0	0	49.6536	11.4988
siR65630	ACATTTCAGAGAACAACGGAAGCT	24	0	0	0	0	0	0	0	24.9137	0	0	LTR:0
siR66080	ACCAAATTAAGAAACGTTGTCGGG	24	0	7.29469	0	0	0	50.9025	0	0	0	0
siR66112	ACCAACAAGGCAGAACACAGACCA	24	0	0	0	0	0	0	0	28.02	0	0
siR66688	ACCAAGGAGCTAGAGCGACAGCGG	24	28.2829	17.2967	0	0	0	86.6718	73.0198	0	38.9772	0
siR67094	ACCACACAGTAGGGATGAGCGAGT	24	8.56206	3.53454	2.28497	1.80294	0	0	0	9.95281	14.913	11.0649
siR67547	ACCACGACCTGTTCAAGAACGGCT	24	9.82532	5.0386	2.19709	0	0	47.1192	47.4288	15.9752	11.6367	1.15711
siR67550	ACCACGACTGATATGCTTACCGAC	24	2.38615	1.50406	0	0	0	12.4677	10.7482	7.54385	3.5023	1.88031
siR67554	ACCACGAGATGCTCTAGGAATCAC	24	0	0	0	0	0	15.735	11.9425	0	2.76795	0
siR67810	ACCACTGACTGCAGAAGAGAGAGG	24	0	0	8.52471	0	0	0	0	20.4762	0	0				13109.m01055_intr1-antisense
siR67829	ACCACTGCATGAGACGCTCTCCTA	24	5.96537	4.81299	0	0	0	0	0	12.6787	11.9191	0
siR67836	ACCACTGCTAGACTACAAGACGAG	24	40.2136	23.0121	5.00937	0	0	67.0674	99.3786	84.4404	34.3452	13.0175	LTR/Copia:1					LOC_Os11g28370.1|13111.m02728|1000bp_UpstreamSeq|15869584..15870586
siR67988	ACCAGAACGATGGGACGGATGAGA	24	0	0	0	0	0	0	10.0658	3.35987	0	0	LTR/Gypsy:0					LOC_Os08g25410.1|13108.m02607|1000bp_UpstreamSeq|15459622..15458620
siR68008	ACCAGAAGTAGAGACGAGACACAC	24	30.2479	15.3414	7.64587	7.29763	5.06643	0	0	42.7907	37.904	0
siR68368	ACCAGGAGACTAACAACATCAGCG	24	0	0	0	0	0	20.5501	20.9847	11.5376	0	0
siR68383	ACCAGGATACTCGCAGATCGGACA	24	0	0	0	0	0	81.0828	91.4454	68.5286	16.6077	8.53372
siR68616	ACCAGTGGGATTGCAACAATCGGA	24	2.73705	0	0	0	0	14.6173	14.4163	0	0	0
siR68988	ACCATCCAGAAGTTCTGCAACACC	24	5.61447	2.78251	0	0	0	0.429919	0	20.9199	8.07789	4.48382			13102.m01414_exon7-sense
siR69269	ACCATGACGGTAAGTGGGGATGTG	24	0	4.28657	0	0	0	12.1237	11.6013	6.21258	8.58629	0					13106.m05162_intr2-sense
siR69394	ACCATGGCGCTAGAGGAGGATGAG	24	10.106	5.86583	0	0	0	87.7895	61.7598	40.7621	12.6535	2.82047			13106.m02114_exon1-sense
siR69402	ACCATGGGGATTGTAGTCATAGGT	24	10.3166	0	0	0	0	0	45.3815	25.3575	11.9756	0
siR69730	ACCCAAACACAAGCACACGGACTA	24	0	0	0	0	0	27.6008	15.0987	0	0	0.433918	LTR:0
siR69873	ACCCAAGTGACTACAGAAGATATA	24	0	2.70731	0	0	0	13.0695	11.0895	8.68493	5.0275	0
siR69930	ACCCACAACGGCAAGCTGACTGAC	24	0	0	0	0	0	23.0437	21.2406	16.7993	0	2.89279						LOC_Os01g20170.1|13101.m02191|1000bp_UpstreamSeq|11470443..11471445
siR70099	ACCCACTTGTTTTGAACCGTCGGA	24	14.4573	10.9044	4.13053	0	0	54.4278	73.361	44.8193	23.3299	9.18459					13112.m04157_intr1-sense
siR70964	ACCCGACTGCGCTAAGACTGCCTA	24	10.1762	7.7459	1.93344	0.171709	0	118.142	61.2479	73.2831	28.8093	12.0774
siR71306	ACCCTAATTCATTGCTCTGAGGAC	24	1.61416	1.35365	0	0	0	8.77036	11.0042	5.57864	0	0	LINE/L1:1
siR71710	ACCCTGAAGCACACATGTAGATGA	24	8.21116	3.45934	1.14249	0	0	32.9318	23.032	18.0672	6.66567	2.38655
siR72115	ACCGAACACGTTGGAATAATTGGC	24	0	0	0	0	0	0	0	18.8913	55.359	0					13107.m00953_intr2-sense
siR72300	ACCGAATTGAGAAGCATTGGGCAT	24	0	0	0	0	0	0	0	19.652	0	0
siR72348	ACCGACAAGAAGACACATGATGGT	24	4.84248	1.12804	0.351534	0	0	26.9989	23.7997	16.1654	2.20306	0.433918
siR72555	ACCGACCTTATGGAGATTTGTCTT	24	3.93013	3.23373	0.790953	0.0858545	0	12.3817	10.9189	7.54385	6.5527	3.6883			13101.m01782_exon1-sense
siR72657	ACCGACGGGCTTAAATAGGTGGGG	24	27.4407	24.2154	13.7098	6.43909	0	0	2.72971	5.95901	54.1162	14.9702						LOC_Os09g27200.1|13109.m02643|1000bp_UpstreamSeq|16533787..16534789
siR72722	ACCGACTAGGGCTCAGGCTAGAAG	24	2.03524	0.75203	0.439418	0	0	11.1779	9.7246	4.94471	2.59848	0.650877
siR72770	ACCGACTGAGTAGGGGGACACGGA	24	0	0	4.04265	2.8332	3.2838	0	5.71534	0	18.4718	7.23196
siR72999	ACCGAGGCTGCTGGTGATTTGCGT	24	10.2464	0	0	0	0	0	0	0	0	0
siR73163	ACCGATCGGCTGTTCGTCGTCATG	24	5.19338	1.95528	0.96672	0.0858545	0	10.49	12.2837	2.21878	2.76795	0.506237
siR73357	ACCGCACGACACCTGAATGACGAA	24	21.2648	8.87395	0	0	0	79.7071	75.2377	55.1525	24.7986	0
siR73815	ACCGCTGCCAGACTACAAGACGAG	24	12.9133	6.01624	1.84556	0	0	22.3558	26.5294	26.245	9.32065	4.84542	LTR/Copia:1		13111.m01427_exon1-sense
siR73932	ACCGGAACTAGAACCTGCAGACGG	24	0	16.0182	0	0	0	0	0	88.1172	0	0						LOC_Os12g17660.1|13112.m01871|1000bp_UpstreamSeq|10115536..10114534
siR73940	ACCGGAAGAATTGCATGAAAAGAA	24	0	0	0	0	0	0	0	0	41.3498	0						LOC_Os11g28370.1|13111.m02728|1000bp_UpstreamSeq|15869584..15870586
siR73972	ACCGGACAACTGATGATCAGAGAC	24	8.98315	0	3.42746	0.77269	0	0	0	0	14.8001	2.24191
siR74279	ACCGGCATCCAAGAAGACAGCATT	24	0	0	0	2.8332	0	0	0	20.7297	25.6459	0						LOC_Os11g07840.1|13111.m00819|1000bp_UpstreamSeq|3995875..3994873
siR74365	ACCGGCGAGGATGATGCAACGGAA	24	0	0	0	0	0	0	23.5438	0	0	0
siR75015	ACCGGTGTGCAAGGAAGAACGGAG	24	0	0	0	0	0	0	16.293	0	0	0
siR75429	ACCGTCGGATCACCAGTCAAGCAG	24	8.21116	4.88819	2.19709	0.343418	0	58.641	32.33	25.611	13.4443	6.21949					13112.m04157_intr1-sense
siR75558	ACCGTGCACATGGGAAGGAAGACG	24	0	0	0	0	0	36.1992	16.0371	0	2.20306	0	LTR/Gypsy:0					LOC_Os08g25410.1|13108.m02607|1000bp_UpstreamSeq|15459622..15458620
siR75589	ACCGTGCTCTATGAATTTGATGGT	24	22.6684	9.92679	3.779	1.8888	0	0	13.3074	0	30.278	7.66588
siR75846	ACCGTTGTTGACGAAGATGAGGCT	24	0	0	0	0	0	0	29.7709	11.9814	0	0
siR76045	ACCTAAGTCGACGCAAAGGGCATA	24	10.3166	6.16664	0	0	0	24.8493	20.6435	10.9671	12.2016	0.867836
siR76119	ACCTACAGGACACAAGATTGGCTC	24	10.1762	5.1138	0.96672	0	0	45.2275	38.0454	16.9261	11.8626	2.38655	DNA/MuDR:0			13106.m02114_intr1-antisense
siR77247	ACCTCTGACAGGGATGAACCAGGA	24	2.9476	0	0.703069	0	0	20.8941	18.8521	11.601	0	3.54366	DNA/En-Spm:0
siR77416	ACCTGAACCACCGCATCGAAAGAC	24	4.84248	0	0	0	0	0	0	27.3227	10.3374	0
siR77454	ACCTGAATGACGAATTAGCACCAG	24	6.03555	2.78251	0.96672	0	0.0938228	35.6833	27.809	17.3065	6.77865	2.53119
siR77456	ACCTGAATGACGGATTAGTATTCC	24	8.0708	4.13616	0.96672	0	0	19.1744	16.7195	13.693	8.47331	3.25438
siR77602	ACCTGCAAGAGATGTGTTTCTGAG	24	7.08827	3.53454	0	0	0	18.8305	20.5582	13.3761	7.28705	0
siR77607	ACCTGCAAGATGAGATCGATCGAG	24	2.38615	0.902435	0	0	0	11.0919	9.46869	0	1.29924	0
siR77800	ACCTGGACATGAACAACAAGATGC	24	11.7904	6.54266	0	2.23222	0	0	5.71534	17.9404	10.5069	6.72573			13104.m00770_exon1-sense
siR78015	ACCTGTCGTAACTCGTAAGCCGGT	24	0	0	0	0	0	0	0	41.8398	0	33.267
siR78384	ACCTTCCCCGTCGACCGTCGTGCA	24	8.77261	4.96339	1.84556	0	0	61.0486	68.9253	32.4576	9.43362	0		13107.m00837_exon5-antisense
siR78678	ACCTTGTAGGACACAGGCAGATAA	24	0	0	0	0	0	15.5631	16.0371	0	0	0
siR78794	ACCTTTGAACATGTAGTTACCGAG	24	5.89519	0	0	0.257563	0	24.0755	20.0463	13.6296	5.81834	5.56861						LOC_Os06g48550.1|13106.m05162|1000bp_UpstreamSeq|29375998..29377000
siR78932	ACGAAAACCTGGACCGGACGTTGA	24	0	0	0	0	0	39.8105	0	0	0	0
siR79079	ACGAACACTCCGATCAATGAGCAA	24	3.01778	1.42886	0.263651	0	0	12.5536	12.7102	8.17778	4.06719	1.59103
siR79396	ACGAAGACCTGAACATGAGATGTC	24	0	0	0	0	0	0	0	0	23.1039	0
siR79478	ACGAAGGTGTTGCAAATCGTTGGC	24	0	0	0	0	0	0	18.3403	0	0	0
siR79508	ACGAAGTTAGAGGACTCAGGCTTA	24	0	0	0	0	0	10.576	15.2693	0	0	0	LTR/Gypsy:1
siR79591	ACGAATCGGACGTCAATATCGGCA	24	0	0	0	0	0	0	0	0	73.8308	0
siR79748	ACGACAAAGCTCAAAGACGTGGAT	24	3.22832	0	0	0	0	14.4453	0	0	0	0
siR79817	ACGACAAGTTAGCAAAAGAAGCCA	24	4.49157	2.25609	0.96672	0.171709	0	11.0919	8.61566	9.76263	3.27635	2.82047						LOC_Os12g40000.1|13112.m04157|1000bp_UpstreamSeq|24697598..24696596
siR79851	ACGACACACGCATTGGAGAGACAT	24	12.1413	0	0	0	0	0	2.3032	19.2083	21.5222	0
siR79883	ACGACACCTGAATGACGAATTAGC	24	8.98315	0	1.58191	0.515127	0	32.8458	30.8799	0	14.5741	0
siR79911	ACGACACTGTCCTGCTGCATTAAT	24	0.912351	0.225609	0	0	0	10.576	5.97125	3.80362	0.734354	0				13106.m02474_intr2-antisense
siR79951	ACGACAGCGGAGAGGTAGCAGTAG	24	10.878	0	0	0	0	0	0	0	0	0			13101.m01861_exon3-sense
siR80153	ACGACCGACGAGAATGCGTTCAAA	24	3.36868	0	0	0	0	0	10.6629	5.64204	0	1.88031			13108.m02607_exon7-sense
siR80400	ACGACGAGCAACCCAAAACCACGG	24	0	6.46745	0	0	0	66.6375	44.955	31.0629	11.6367	3.83294
siR80501	ACGACGCAACATTGGACACGCTAG	24	3.93013	0	0.527302	0	0	9.28626	13.7339	7.10009	2.82444	0						LOC_Os01g25370.1|13101.m02688|1000bp_UpstreamSeq|14333135..14332133
siR80571	ACGACGCTGTGGCAGACAAGTCAT	24	0	0	0	0	0	0	0	0	77.5026	0
siR80595	ACGACGGAAGAGTATGCACACAAC	24	0	0	0	0	0	0	0	0	10.7894	0					13107.m00953_intr2-sense
siR80618	ACGACGGAGGATGATGGCTGCAGC	24	9.33405	1.65446	0	0	0	55.7176	50.4997	16.5458	3.72826	0.361598	LTR/Gypsy:0
siR80858	ACGACTCATGTCTGGATTGTGCAC	24	0	0	0	0	0	47.807	0	0	0	0
siR80862	ACGACTCCACAGACTACCAAGCAC	24	10.6675	12.7093	0	0	0	88.6494	57.5799	51.6025	26.6062	12.7283					13107.m00837_intr2-sense
siR80870	ACGACTCCGACTCCGTAGAGACGC	24	9.68496	7.14428	0	0	0	0	0	0	11.7497	0						LOC_Os07g09470.1|13107.m00954|1000bp_UpstreamSeq|4996820..4997822
siR80930	ACGACTGCGTAGATGGGGAAGATG	24	0	0	0	0	0	0	0	70.8741	0	0
siR80947	ACGACTGGGGGCATGCATCTAAAC	24	0	0	0	0	0	23.0437	0	0	0	0
siR80957	ACGACTGTTGGGTATAAAATGTGC	24	0	0	0	0	0	0	0	0	68.4079	0					13107.m00953_intr2-sense
siR80987	ACGACTTCAGCAAAGGAACTGGTG	24	3.85995	1.95528	0	0	0	11.3499	15.7812	10.143	4.97101	1.66335
siR81059	ACGAGAAATCTGAGATGCAAGAAG	24	37.1958	18.0487	3.779	0.600981	0	129.148	110.127	124.632	31.0688	14.8978
siR81084	ACGAGAAGGGGAGTAGGCTGCAGC	24	0	0	0	0	0	0	21.4965	0	0	0
siR81117	ACGAGACCAAACTTACAGTACTGA	24	6.45664	2.4817	0.790953	0.429272	0.375291	0.0859839	6.39776	12.7421	5.08399	2.16959						LOC_Os04g59030.1|13104.m06218|1000bp_UpstreamSeq|34931995..34930993
siR81148	ACGAGACCTGTATACACATCTAAG	24	6.31628	3.60974	1.31825	0	1.12587	0	9.98051	19.9056	11.2413	4.12222
siR81208	ACGAGAGGCGAAAGAAGTAGGCAG	24	0	0	0	0	0	53.8259	0	0	0	0				13105.m00973_intr1-antisense
siR81254	ACGAGATGAAGAGCGAAGTTTGAT	24	13.1238	0	0	0	0	0	32.4153	15.5315	0	0
siR81261	ACGAGATGCTCTAGGAATCACGCA	24	0	0	0	0	0	0	15.9518	8.36797	5.08399	0
siR81263	ACGAGATGGGAACTAATCGGCCGG	24	0	0	0	0	0	20.6361	23.7997	0	0	0
siR81275	ACGAGATTGGAGGTGGCTATAGAT	24	0	0	0	0	0	74.806	70.8019	0	20.11	4.91773					13108.m02607_intr3-sense
siR81278	ACGAGATTGGTAAAAAGACAGCTC	24	27.5109	0	0	0	0	52.7081	69.0959	48.7497	19.997	8.89531
siR81280	ACGAGATTGTAGTAAATAGATGGA	24	157.556	0	0	0	0	411.261	0	355.322	0	68.3421					13108.m02607_intr3-sense
siR81319	ACGAGCAGAAACAACGAGTAGAAT	24	0	0	0	0	0	12.4677	8.95687	0	0	0
siR81335	ACGAGCATAGAGCGGTTGAATTGG	24	0	0	2.28497	0	0	0	44.0166	0	0	0
siR81348	ACGAGCCCTGGAAGATCTGCTTAG	24	2.03524	1.12804	0.527302	0	0	14.4453	12.369	8.87512	2.71146	1.37407	LTR/Gypsy:0
siR81358	ACGAGCGAACGAAAAAATGATCAG	24	2.38615	2.33129	0.527302	0	0	10.3181	11.2601	5.70543	3.55879	1.30175
siR81378	ACGAGCGCAACGAGTACACCGACG	24	0	0	0	0	0	0	22.2642	0	0	0			13106.m05162_exon3-sense
siR81409	ACGAGCTAGGACGCCAGCTGCTGC	24	4.91266	0	0	0	0	12.8116	0	0	5.14048	0
siR81425	ACGAGCTCTGGCAGCGACGCAATT	24	0	0	0	0	0	43.6798	46.4051	0	0	0
siR81485	ACGAGGAGTGCAACGCAACTAGGA	24	0	0	0	0	0	11.2639	0	0	0	0
siR81738	ACGAGTTGTAGCTGGGTCGGTCGA	24	5.96537	0	0	0	0	25.4512	21.2406	7.86082	8.69927	2.53119
siR81865	ACGATATCAGAACCGTACTGCCTC	24	0	0	0	0	0	10.3181	13.6486	0	0	0
siR82040	ACGATCAGTAGGTAAGACAGGAAT	24	3.71958	0	0	0	0	8.5124	11.7719	16.419	9.09469	0
siR82408	ACGATGGAGGAGTGTAGTGATGGA	24	3.93013	0.075203	0	0	0	26.569	23.4585	11.8546	0.564888	0.216959
siR82482	ACGATGTCAGATAAAACGAAACGG	24	0	0	0	0	0	0	59.4566	0	0	0	DNA/Stowaway:0
siR82574	ACGATTAGACTGCATGCATCTTTT	24	6.38646	2.5569	1.40614	1.20196	1.2197	0	3.32684	12.5519	9.60309	1.66335					13107.m00904_intr1-sense
siR82642	ACGATTGATCTTGAGTTGCTGCAT	24	0	0	0	0	0	0	19.108	0	0	0
siR82709	ACGATTTGTATGAGTGGAGATTGA	24	6.597	0	0	0	2.34557	0	0	0	10.168	0				13107.m03731_intr4-antisense
siR82932	ACGCAGGTGAAGAAATACGACATG	24	0	0	0	0	0	0	0	13.6296	0	1.51871
siR83140	ACGCCATCGCCAGACAACACGCAG	24	5.1232	2.03048	0	0	0	45.4855	31.9035	0	5.19697	0				13107.m00837_intr4-antisense
siR83431	ACGCGACTGATCTGCCGAAGATGA	24	3.93013	1.80487	0	0	0	27.4289	20.7288	14.1368	0	0		13106.m01477_exon1-antisense		13106.m01477_intr1-antisense
siR83567	ACGCGTACCTTAATCTGAACCGGA	24	6.87772	2.70731	0	0	0	47.5491	38.3866	0	0	5.78557	LTR/Gypsy:0
siR83722	ACGCTCACGAACAACCAATGACGG	24	9.5446	5.64022	0	0	0	26.741	28.8326	20.7931	10.281	3.97758
siR83857	ACGCTGGGCTGCGGAGATGGCAGA	24	0	0	0	0	0	23.2156	0	0	0	0					13112.m04157_intr1-sense
siR84062	ACGGAAATCGAACAAGGTGATTAG	24	7.29881	3.91055	0	0.257563	0	17.6267	18.5962	11.3475	6.77865	0						LOC_Os12g09060.1|13112.m00961|1000bp_UpstreamSeq|4735236..4734234
siR84087	ACGGAACCCTAACAACGAGGAGAA	24	0	0	0	0	0	0	0	30.7459	0	0	DNA/MuDR:0
siR84104	ACGGAACGGTCCATTAGCACGTAA	24	0	0	0	0	0	13.9294	0	0	0	0	DNA/Tourist:1			13112.m04051_intr3-antisense
siR84123	ACGGAAGAGGGAACAATCGGCCAT	24	0	0	0	0	0	0	0	0	12.0886	0					13107.m00953_intr2-sense
siR84269	ACGGACCTAGAGTGTAACAAGCAG	24	0	0	0	0	0	199.139	144.419	0	0	0
siR84442	ACGGACTAGCGGTTTACCCCCATT	24	52.7058	30.4572	0	0	0	78.5893	79.5029	27.3227	53.6078	4.26686	LTR:0
siR84492	ACGGACTCGGAATCAGGCAAATGA	24	0	14.5894	18.3677	7.5552	10.7896	0	0.682428	0	0	0	LTR/Gypsy:1					LOC_Os03g50250.1|13103.m05463|1000bp_UpstreamSeq|28639139..28640141
siR84508	ACGGACTGGAAGTGCGGAATCGAG	24	0	2.78251	0	0	0	0	18.255	6.65634	0	0		13112.m04157_exon1-antisense
siR84560	ACGGAGCACCTAAATACAACTGAA	24	6.03555	0	0	0	0	17.6267	0	0	0	1.73567		13112.m00961_exon8-antisense		13112.m00961_intr7-antisense
siR84640	ACGGATAGTAGAGCAATTTTACGG	24	5.96537	2.25609	0	1.11611	0	0	0	12.3618	5.87483	4.55614
siR84685	ACGGATCAGACAGAGGGTAGCCGA	24	6.45664	3.23373	0	0	0	25.4512	22.2642	12.9323	7.96492	2.31423	LTR/Gypsy:1
siR84688	ACGGATCAGAGAGGAACACGGTAG	24	8.35152	5.48982	0	0	0	1.80566	14.0751	20.2226	14.3481	4.33918
siR84713	ACGGATCCGTGGCTTTACAGGAGG	24	2.24579	0	0	0	0	12.8976	12.4543	4.94471	0	0	LINE/L1:1
siR84801	ACGGATTTAGCATACAAGCAATGG	24	0	0	0	0	0	27.2569	20.7288	16.7993	1.63817	1.88031
siR84810	ACGGATTTTGTGGGTGTGGGAGAG	24	0	0	0	0	0	0	19.5345	0	0	0			13106.m05162_exon3-sense
siR84856	ACGGCACCTGAATGACGGATTAGT	24	0	0	0	0	0	46.1733	52.4617	26.9423	0	0
siR85002	ACGGCCGAGGAGCATCAATAAGTT	24	7.08827	5.41461	0	0	0	12.5536	14.2457	7.54385	9.15118	1.44639			13105.m00973_exon2-sense
siR85142	ACGGCGATGGCTAAGGAAGACTGG	24	11.0184	0	0	0	0	0	10.5776	29.9218	0	0				13105.m03219_intr1-antisense
siR85371	ACGGCTGTTGATCGTTGATGGTGT	24	0	53.6949	0	0	0	0	0	0	0	0
siR85425	ACGGGAAGAAGAGGAACCTACCAG	24	0	0	0	0	0	11.6938	0	0	0	0						LOC_Os01g44160.1|13101.m04572|1000bp_UpstreamSeq|25312748..25311746
siR85555	ACGGGCGCAACTCTAGACGATGGG	24	0	0	0	0	0	0	57.324	0	0	0				13108.m02607_intr4-antisense
siR85619	ACGGGGTGGTAGCTTTTGATTGGC	24	3.2985	0	0	0	0	9.11429	11.516	2.9795	0	0
siR85654	ACGGGTATCTCTGTCGTCAAGCAA	24	0	0	0	0	0	17.0248	15.9518	0	0	0				13106.m01477_intr1-antisense
siR85669	ACGGGTCATAGCTGGGACGGTTGA	24	0	0	0	0	0	27.5148	0	0	0	1.59103						LOC_Os05g19360.1|13105.m02043|1000bp_UpstreamSeq|11244850..11245852
siR85713	ACGGGTGGGTAGACGATATGCAAC	24	7.22863	0	3.25169	2.8332	1.68881	0	4.26518	0	12.4275	0
siR85751	ACGGTAAGTGGGGATGTGTACATG	24	0	0	0	0	0	0	39.4955	0	0	0					13106.m05162_intr2-sense
siR85763	ACGGTACACCCCGTCGACGTCGCC	24	25.616	0	0	0	0	83.3184	145.613	20.4762	37.565	0
siR86039	ACGGTCAGGCGAGGTGGAGACGCG	24	39.3715	16.9207	5.44878	0	0	258.124	218.292	154.807	39.994	0						LOC_Os06g23010.1|13106.m02474|1000bp_UpstreamSeq|13426643..13427645
siR86041	ACGGTCAGTTCAGAAGTCTCCGGT	24	3.36868	1.20325	0	0	0	12.2097	11.7719	7.22688	3.89772	1.73567
siR86095	ACGGTCGACGACGGTGGTAGGCAG	24	0	10.8292	0	0	0	15.821	0	0	0	0				13107.m00837_intr2-antisense
siR86237	ACGGTGAGAAGGAAAGCTTGAGTA	24	0	0	0	0	0	11.0919	9.21278	0	1.63817	0
siR86303	ACGGTGGCTTGAGCGTACACGGTG	24	1.54398	0	0	0	0	11.0059	8.18914	0	1.29924	0						LOC_Os06g19790.1|13106.m02114|1000bp_UpstreamSeq|11301571..11302573
siR86388	ACGGTTCAAAACAAGTGGGTAGAT	24	9.96568	6.39225	1.23037	0	0	38.4348	32.8419	18.7011	7.40003	1.37407				13112.m04157_intr1-antisense
siR86457	ACGGTTGTAGCATGGGGTGGATAT	24	0.84217	0.676827	0	0	0	10.834	8.95687	5.07149	1.12978	0
siR86475	ACGGTTTATCTATGGCGTCGGTTC	24	12.0711	0	0	0	0	0	7.08019	9.50905	27.0016	4.7731				13109.m01055_intr1-antisense
siR86654	ACGTACGACAACACTAGTAGCTGA	24	7.71989	4.51218	1.40614	0.257563	0	16.3369	21.4965	14.8975	5.81834	2.89279
siR86704	ACGTACTGTCGGCATCTTTTCCAT	24	27.7214	16.3942	0	0	0	0	0	0	29.2047	0				13112.m03275_intr1-antisense
siR86751	ACGTAGATGAGGCGGAGAACAGAG	24	0	0	0	0	0	25.0213	0	0	0	0
siR86757	ACGTAGATTTAGTTGGGCCTTCCG	24	0	0	0	0	0	0	12.1984	0	3.67177	0
siR86841	ACGTATCCTAGAACTCAAGAGGCT	24	0	4.66258	0	0	0	22.0119	25.847	17.3699	0	0
siR86949	ACGTCACCGTGCGTAGGATCACCG	24	0	0	0	0	0	0	11.0042	0	0	0	DNA:1					LOC_Os01g46680.1|13101.m04800|1000bp_UpstreamSeq|26581422..26580420
siR86993	ACGTCAGTACATGCCGTGGGACGG	24	2.17561	0	0	0	0	19.0884	19.7904	6.52955	3.10688	0.578557				13108.m02607_intr4-antisense
siR87338	ACGTCTAGGTCACGGGTCGAACGG	24	5.82501	5.1138	0	0	0	0	0	0	10.281	5.20701
siR87397	ACGTCTGCAAGAGCGAGCTAGAGA	24	0	0	0	0	0	10.404	8.78626	4.37416	4.12368	0
siR87553	ACGTGACGACGAGCAACCCACAAC	24	0	0	0	0	0	18.4865	13.9898	0	4.06719	0
siR87598	ACGTGAGTGGGAAGACTAATGGGA	24	7.43917	0	0	0	0	0	28.3208	11.7278	6.49621	0						LOC_Os06g19790.1|13106.m02114|1000bp_UpstreamSeq|11301571..11302573
siR87656	ACGTGCAGAGCGAGCGGAAGGCTG	24	0	0	0	0	0	0	0	0	16.6642	0						LOC_Os09g27200.1|13109.m02643|1000bp_UpstreamSeq|16533787..16534789
siR87701	ACGTGCCTGCAAGAGAGAAGAGGA	24	5.54429	3.98576	0	0	0	24.1615	21.5818	21.9342	10.4504	0
siR87711	ACGTGCGGATATGACGGTGATGAT	24	26.388	0	0	0	0	57.3512	89.654	59.6535	23.2734	6.94268
siR87720	ACGTGCGTGTAGAGGGAGTTAGAG	24	5.82501	0	0	0	0	21.496	23.2026	11.7912	4.68857	0.506237
siR87744	ACGTGCTGGCCAAGCAGATCTGCA	24	0	0	0	0	0	0	0	0	14.8001	0			13107.m00904_exon3-sense
siR87774	ACGTGGAGCTTTGGTTCGTTGGAT	24	0	0	0	0	0	20.6361	21.07	0	0	0
siR87824	ACGTGGCCTCTGGAAAAGACGACA	24	0	0	0	0	0	0	67.5604	0	0	0
siR87867	ACGTGGTAGGTAACTGATGTTGGG	24	9.75514	4.06096	0	0	0	31.3841	36.3393	16.419	8.58629	1.51871
siR87904	ACGTGTAGAAACAAGATGGTACCA	24	0	0	0	0	0	0	0	20.9199	0	0
siR87905	ACGTGTAGAAGAGATCATCAGTAG	24	11.0184	0	0	0	0	0	42.0546	25.2307	0	0
siR87949	ACGTGTCGCAGCTAGGAGTGGTAA	24	0	6.01624	3.25169	1.37367	0	0	0	0	16.0428	0						LOC_Os08g28150.1|13108.m02904|1000bp_UpstreamSeq|17184202..17183200
siR88008	ACGTGTTGAGCTGGGGCGGCCTCG	24	0	0	0	0	0	13.0695	8.44505	3.93041	0	0			13106.m05162_exon2-sense
siR88059	ACGTTAGATTGATGGGTAGAAGGC	24	12.0009	0	0	0	0	0	7.59201	0	20.7314	0
siR88579	ACTAACACAATCAGATGTAGACGT	24	0	0	0	0	0	0	0	0	0	10.5587				13103.m05651_intr3-antisense
siR88644	ACTAACCGGAGTGCCATCGCCTGA	24	6.597	2.6321	1.66979	0.77269	0	25.4512	23.2879	14.5805	8.41683	3.25438
siR88712	ACTAACTGGATGGCATTATAAACC	24	0	0	0	0	0	0	11.6866	0	0	0
siR88717	ACTAACTTGTAGGAAAAAGGCTTG	24	6.45664	0	0	0	0	0	12.4543	7.22688	6.32674	0
siR88734	ACTAAGAAGACTCTACCGGTGACG	24	0	0	0.527302	0	0	23.8175	0	11.1573	5.93132	0					13112.m04157_intr1-sense
siR88745	ACTAAGAGGTAGAAAGGTTGGTTA	24	0	0	2.98804	0	0	0	0	11.3475	0	0						LOC_Os09g32750.1|13109.m03271|1000bp_UpstreamSeq|19535648..19536650
siR89062	ACTACAAGTCAGATGGGCTCCAGG	24	0	0	0	0	0	0	11.1748	0	2.25955	0	LTR/Gypsy:1
siR89269	ACTACATGTTCGAAGGTGGGCCAT	24	0	0	0	0	0	13.3275	9.38339	3.9938	0	0
siR89281	ACTACCAAGCACTGACAACCGCCT	24	0	0	0	0	0	0	0	11.601	0	0					13107.m00837_intr2-sense
siR89420	ACTACCGACTACTCGCTCCCGGCA	24	4.91266	0	0	0	0	0	0	9.82602	11.9756	0		13108.m03742_exon4-antisense
siR89472	ACTACCTGCAAGAGCTGCATTACC	24	0	0	0	0	0	0	39.5808	0	0	0					13106.m02474_intr2-sense
siR89618	ACTACGACTCGGACCCTGGCGGCG	24	0	0	0	0	0	24.2475	0	0	0	0
siR89676	ACTACGGATTAGCAGTTTGCCGCA	24	0	0	0	0	0	0	10.7482	0	0	0
siR89838	ACTACTGAACTGCTGAAGGTGGTG	24	14.9485	4.66258	0	0	0	33.1898	28.4061	30.2388	5.5359	0						LOC_Os06g23010.1|13106.m02474|1000bp_UpstreamSeq|13426643..13427645
siR89981	ACTAGAAGAGCTGCAACAGATTGA	24	0	0	0	0	0	26.913	22.3495	0	0	0
siR90028	ACTAGACATTTTGGCGCTCGTTGT	24	0	10.1524	0	0	0	82.8025	67.0486	0	21.2963	0
siR90263	ACTAGCGACGAATAGACATTGGGA	24	4.56176	2.70731	0	0.171709	0	14.1014	16.4636	8.24118	4.57559	1.51871
siR90413	ACTAGTAAGGTAGAAATAATGGTC	24	0	8.42273	0	0	0	0	26.6147	0	0	0
siR90604	ACTATAATAGCACCTTGGTCGTCA	24	0	0	0	0	0	15.2191	0	0	5.70537	0						LOC_Os07g27450.1|13107.m02740|1000bp_UpstreamSeq|15988987..15989989
siR90652	ACTATAGAGGCTCTTGACGTGGCA	24	9.05333	0	0	0	0	30.2663	37.0217	25.5477	0	0
siR90674	ACTATAGCTGATAACGTCGACTCC	24	0	3.83535	1.14249	0	0	21.496	0	12.1716	8.69927	0
siR90680	ACTATAGGGGTTAGGCGATGGAGC	24	0	0	0	0	0	13.2415	0	0	0	0
siR90689	ACTATAGTCGAAGCTGCATTTCAT	24	51.0917	0	0	0	0	0	0	0	0	0
siR90849	ACTATCGGAACCAAGCAAGCCATT	24	10.2464	0	0	0	0	34.5655	0	23.7092	0	0
siR90966	ACTATGATGACCACAACACTCGGC	24	0	0	0	0	0	11.7798	11.7719	0	3.72826	0				13112.m00961_intr2-antisense
siR90985	ACTATGCACATTGTTGATCTTCGA	24	4.84248	2.78251	0.790953	0	0	10.576	13.1367	6.27597	4.29315	2.31423
siR91001	ACTATGCATAGTTTGACGGTTGAG	24	5.33374	2.4817	0	0	0	9.11429	10.5776	5.0081	5.76185	0
siR91070	ACTATGGTCCATGGACAAGACGAC	24	0	0	0	0	0.750583	0	0	86.7859	59.8781	0
siR91390	ACTCAACTCAGCACCGACGAGCAC	24	0	0	0	0	0	96.6459	0	0	22.9344	0
siR91397	ACTCAACTCTGAAGACGTGCTCCC	24	0	0	0	0	0	419.085	289.179	0	82.4171	0			13108.m02607_exon7-sense
siR91436	ACTCAAGTCTGACCGGGGAAGGCA	24	0	0	0	0	0	0	0	11.7278	9.5466	0
siR91657	ACTCAGCGCTCGGTATACTTTACA	24	23.7913	14.5894	0	0	0	89.5092	65.6837	71.7616	37.678	13.0899
siR91705	ACTCAGTGACCCGGATTGAACGGT	24	0	0	0	0	0	0	21.07	0	0	0
siR91973	ACTCCAAGTAGATAGAACAAGTTG	24	0	3.45934	0	0	0	0	16.4636	12.235	4.40612	0
siR92059	ACTCCACTCTGAAGACGTGCTCCC	24	0	0	0	0	0	0	0	0	58.6353	0			13108.m02607_exon4-sense
siR92671	ACTCGAAGAACTAGGGCAGCTGCA	24	7.57953	0	0.615185	0	0	0	31.477	13.9466	6.66567	1.51871				13107.m00837_intr4-antisense
siR92700	ACTCGACGAGATTGGAGGTGGCTA	24	59.0923	0	12.1279	0	0	307.564	230.49	145.362	87.2751	0					13108.m02607_intr3-sense
siR92716	ACTCGACGGGAGCAAGAGATTGTG	24	0	0	0	0	0	24.9353	22.1789	12.3618	0	0
siR92793	ACTCGATTTCATGAAGACAAAGCG	24	0	14.5142	0	0	0	116.422	0	0	0	0					13106.m02474_intr2-sense
siR92874	ACTCGGAATTGCTTGTGTAGATGG	24	0	0	0	0	0	0	0	24.5967	0	0
siR92945	ACTCGGTATGAAATTGAAGTCGCA	24	0	0	0	0	0	0	0	0	0	49.2497
siR92985	ACTCGTAGCTGTGACGCATGCTTT	24	0	0	0	0	0	20.3782	18.0843	0	0	0
siR93014	ACTCGTCCGGATAGATCCAAGGTA	24	19.8612	0	6.32762	0	0	0	0	0	0	0
siR93089	ACTCGTTGTGCTGTATTTTTGGAG	24	5.89519	2.78251	0	0	0	27.1709	24.0556	0	0	0
siR93169	ACTCTACGGACACCGGTTTCACCA	24	0	0	0	0	0	9.02831	12.8808	3.74023	0	1.08479
siR93184	ACTCTAGACGATGGGGTGGGCTGG	24	9.05333	0	0	0	0	39.2086	27.9796	0	3.38933	0				13108.m02607_intr4-antisense
siR93509	ACTCTGACTCCCAATGATGGACGA	24	0	0	0	0	0	0	0	12.8689	0	0
siR93694	ACTCTTAAAGATGGTGGTGGTCGT	24	0	0	0	0	0	0	12.369	0	0	0
siR93816	ACTCTTGGCATTGCAGATTTCATC	24	0	0	0	0	0	45.4855	45.1256	20.2226	0	0		13106.m05162_exon1-antisense
siR93820	ACTCTTGGGCTCGTTTCACGGTGG	24	0	0	0	0	0	16.8528	0	0	0	2.16959
siR93912	ACTGAACAAAGAACAGTAATGCAT	24	0	0	0	0	0	0	0	10.143	0	0
siR93926	ACTGAACAGTCCGACATTGAAGCC	24	10.7377	6.46745	0	0	0	57.2653	45.5521	52.8069	16.6642	0		13102.m03554_exon2-antisense		13102.m03554_intr1-antisense		LOC_Os02g32780.1|13102.m03553|1000bp_UpstreamSeq|19464461..19463459
siR93954	ACTGAACGTTTGGACACATGCATA	24	0	0	0	0	0	0	0	0	24.1207	0	DNA/Tourist:0
siR93962	ACTGAACTGGCAATGTGACGCTCA	24	0	0	0	0	0	0	0	0	44.6826	0				13107.m00952_intr3-antisense
siR94021	ACTGAATCAGACAAGGAGAAGCCA	24	8.0708	0	0	0	0	22.0979	0	0	0	0	LTR/Gypsy:1
siR94052	ACTGACAAACATTGAAGGACACAT	24	0	0	0	0	0	10.1461	0	0	3.10688	0
siR94088	ACTGACAGATGACTAGTACTACAA	24	0	0	0	0	0	33.4477	22.5201	24.3432	0	0
siR94118	ACTGACCAAGCAAAGCCCTGTACC	24	25.2651	14.5142	0	0	0	108.512	67.0486	76.5796	24.3467	0
siR94121	ACTGACCACACCGCTGATCTTCGT	24	9.68496	5.41461	0	0	0	0	0	26.4986	0	0		13105.m00371_exon1-antisense
siR94128	ACTGACCAGACTGAGCTTCAGAAA	24	0	0	0	0	1.40734	0	1.96198	16.2288	0	0		13108.m02988_exon6-antisense		13108.m02988_intr6-antisense
siR94151	ACTGACCGGTGGTGGGCTATGGTA	24	0	0	0	0	0	19.4324	0	0	0	0						LOC_Os01g20170.1|13101.m02191|1000bp_UpstreamSeq|11470443..11471445
siR94195	ACTGACGGCAACAAGTAAGCTACT	24	0	10.6036	0	0	0	3.09542	0	0	0	0
siR94243	ACTGACTGCAGAAGAGAGAGGTTT	24	0	0	0	0	0	0	0	0	11.0153	0				13109.m01055_intr1-antisense
siR94565	ACTGATTTTGTATGTGGCTGAGGA	24	0	0	0	0	0	30.0084	30.1975	0	0	0
siR94652	ACTGCACCAACCGAACTGAAGATG	24	0	0	0	0	0	18.7445	0	0	0	0						LOC_Os11g13960.1|13111.m01427|1000bp_UpstreamSeq|7726903..7725901
siR94815	ACTGCATTGAAAGAAACGATTTGA	24	0	0	0.439418	0	0	11.8658	10.8335	5.0081	0	0						LOC_Os12g40000.1|13112.m04157|1000bp_UpstreamSeq|24697598..24696596
siR94921	ACTGCCGCATATGCGATCGGTCGG	24	0	8.72354	0	0	0	0	26.5294	0	0	0						LOC_Os12g40000.1|13112.m04157|1000bp_UpstreamSeq|24697598..24696596
siR95127	ACTGCGTGATGATATCGGTACTAA	24	4.14067	2.70731	0	0	0	9.71618	11.516	4.50095	3.61528	1.22943
siR95160	ACTGCTAGACTACAAGACGAGATT	24	4.56176	2.03048	0.175767	0.257563	0	8.94232	8.01853	10.0796	2.54199	0.506237	LTR/Copia:1					LOC_Os11g28370.1|13111.m02728|1000bp_UpstreamSeq|15869584..15870586
siR95400	ACTGGAAGTGCGGAATCGAGATGG	24	0	0	0	0	0	374.374	343.517	169.071	42.8185	10.0524		13112.m04157_exon1-antisense
siR95514	ACTGGATGAACCTGTTAGAGCAGA	24	0	0	0	0	0	0	92.5543	0	0	0				13108.m01397_intr4-antisense
siR95516	ACTGGATGGACTTGAGCAAGCGGT	24	44.9157	0	0	0	0	0	0	0	0	0
siR95526	ACTGGCAAATCTGATATCGGTAAT	24	0	8.72354	0	0	0	0	5.63003	18.0038	12.2581	5.93021		13104.m00770_exon3-antisense
siR95548	ACTGGCATACTTAGAACCCGAAAG	24	0	3.68494	0	0	0	15.3051	17.3166	10.143	8.07789	0	LTR/Gypsy:1
siR95624	ACTGGCTCTCTGTTGTCCTGCATG	24	3.57922	1.88007	0.878836	0	0	17.1108	19.7904	11.0939	4.18017	2.67583
siR95672	ACTGGGCGTAACATGTAAGCTGGT	24	0	0	0	0	0	0	0	0	0	20.3218
siR95685	ACTGGGGGCATGCATCTAAACTCA	24	9.61478	6.39225	0	0	0	27.0849	26.0176	15.2145	11.3542	0
siR95709	ACTGGTAGGATCGATGCATGGTAC	24	0	0	0	0	0	0	12.4543	0	0	0
siR95759	ACTGGTGGAACTTCTCTTGTGGCA	24	8.0708	3.30893	0	0	0	52.2782	52.8029	24.3432	6.27025	0
siR95806	ACTGGTTGATCAGGATAGTTGGCC	24	0	0	0	0	0	0	10.4923	0	0	0
siR96104	ACTGTCCGTCTGTCAAGCAGCCTA	24	1.89488	0	0.175767	0	0	12.2957	11.3454	6.78312	2.31604	1.30175	LTR/Gypsy:1
siR96310	ACTGTGGGACATGGAACTGATGGA	24	0	0	0	0	0	0	49.5614	0	0	0
siR96386	ACTGTTAGATGCGTGAGACCGTGA	24	3.50904	2.03048	0	0.0858545	0	10.0601	10.0658	3.42326	4.5191	0.723196			13112.m00961_exon5-sense		13112.m00961_intr4-sense
siR96464	ACTGTTGGCTTGGATCCAGATGGT	24	23.1597	0	0	0	0	0	0	0	12.71	0						LOC_Os11g28370.1|13111.m02728|1000bp_UpstreamSeq|15869584..158705
siR96595	ACTTAAGAACATATGGCAGCAGAT	24	0	0	0	0	0	0	0	18.8279	0	0
siR96599	ACTTAAGATCTATTGGGCAAATCA	24	9.47441	9.32517	0	0	0	0	0	0	17.1161	0
siR96617	ACTTAATAACACGGAATGTACGCA	24	0	0	0	0	0	49.0968	0	0	14.4611	0	DNA/MuDR:1
siR96695	ACTTACATGTGGTATTTGATTCGG	24	7.93044	0	0	0	0	0	26.1029	0	10.5634	0
siR96723	ACTTACCAACAGAAGGACCTGCAC	24	4.98284	0	3.69111	0	0	0	0	14.4538	8.41683	8.89531
siR96757	ACTTACCTTGGATCTATCCGGACG	24	0	0	0	0	0	0	17.5725	0	0	0
siR96946	ACTTATATGGTTGTTGGAGAATGA	24	19.3699	0	0	0	0	44.0237	46.5757	21.8074	26.3238	0						LOC_Os12g09060.1|13112.m00961|1000bp_UpstreamSeq|4735236..4734234
siR96962	ACTTATCATGCTACAGGACGAGAA	24	6.87772	5.26421	0	0	0	26.2251	24.6527	13.1225	8.5298	3.10974
siR97099	ACTTCAAGTGGAGCGACGGTCGAG	24	0	0	0	0	0	26.1391	16.5489	0	0	0
siR97118	ACTTCAATTTGTGGACAGAGGATG	24	5.82501	4.43697	0	1.28782	0	0	3.49744	10.7135	10.5069	0					13104.m04542_intr5-sense		LOC_Os04g45290.2|13104.m04543|3-UTR
siR97182	ACTTCAGCAGACATCGGTAGGAGG	24	0	0	0	0	0	26.0531	20.3875	13.693	0	0
siR97574	ACTTCGGGAGCGGTATGGAGTATG	24	0	0	0	0	0	26.483	25.0792	13.4395	0	0.216959						LOC_Os06g48550.1|13106.m05162|1000bp_UpstreamSeq|29375998..29377000
siR97580	ACTTCGGTTGGAGCAGGGCAGAGA	24	0	0	0	0	0	0	76.0908	0	0	0
siR97791	ACTTCTCTGAACTTCTGCAGAAAT	24	0	0	0	0	0	0	12.8808	0	6.94812	7.88284
siR97887	ACTTCTTAGTTCTGTGGGATGGTT	24	27.3705	0	0	0	0	60.2747	80.9531	0	33.3284	0				13105.m00973_intr1-antisense
siR97939	ACTTCTTTAGGCAGTCGGCACGAC	24	0	0	0	0	0	0	11.0042	0	0	0
siR98017	ACTTGACAGTTTGAGACTTGAGGC	24	7.79007	4.81299	0	0	0	17.1108	18.7668	0	0	0
siR98031	ACTTGACGAGGCGATACTTTCAGC	24	3.36868	0	0	0	0	13.2415	0	0	4.80154	0
siR98156	ACTTGCACAAAGACATCGCTCGGT	24	14.1064	6.84347	2.81228	0.77269	0	77.9874	71.1431	35.8174	15.5909	0
siR98192	ACTTGCAGGATGATGTTGTTGGGC	24	0	0	0	0	0	43.2499	36.9364	0	0	0
siR98194	ACTTGCAGGGCATGTAGCAATAAA	24	0	0	0	0	0	12.3817	14.2457	0	1.69466	0
siR98384	ACTTGGAAGTAAAAGGAAGCAGCA	24	13.5449	0	0	0	0	0	0	0	0	0
siR98555	ACTTGTAGACGACGCTTGTGTCCA	24	3.36868	1.50406	0	0	0	14.6173	12.1131	5.83222	3.05039	0	DNA/En-Spm:0					LOC_Os08g33600.1|13108.m03502|1000bp_UpstreamSeq|20978983..20979985
siR98659	ACTTGTCGAACCGGCACATGTGTC	24	0	6.16664	0	0	0	19.0024	31.2211	15.1511	12.71	0
siR98688	ACTTGTCTGCCACAGCGTCGTCGT	24	7.57953	3.15852	1.93344	1.37367	2.15792	0	3.41214	5.26168	12.597	3.3267
siR98841	ACTTGTTTTGAACCGTCGGATCAC	24	0	0	2.63651	0	0	22.2698	20.7288	0	0	0					13112.m04157_intr1-sense
siR98919	ACTTTAGACTGAGTTGAGGAATGC	24	0	0	0	0	0	0	0	0	10.5069	4.0499
siR98993	ACTTTATTTGGGAATCGTTGCACA	24	0	0	0	0	0	98.5375	0	55.9132	0	0	DNA/Stowaway:0					LOC_Os12g40000.1|13112.m04157|1000bp_UpstreamSeq|24697598..24696596
siR99218	ACTTTGAATAGGACGAATGATTAA	24	0	0	0	0	0	13.4135	0	0	0	0
siR99332	ACTTTGGGTTCAAGAGCAATGGCA	24	0	0	0	0	0	14.9612	13.3927	0	3.95421	1.59103			13101.m01861_exon1-sense
siR99386	ACTTTGTTTGTCGACTTAAGCGGT	24	49.267	19.9288	6.32762	0.515127	0	126.138	138.533	90.4628	37.0001	8.31676
siR99738	AGAAAAACTGCAGCGGAAAACAAA	24	0	0	0	0	0	40.6704	0	40.5086	0	0	LTR/Gypsy:1	13112.m00961_exon2-antisense		13112.m00961_intr1-antisense
siR99817	AGAAAACAAACACTACTGACCCTC	24	0	0	0	0	0	14.8752	0	0	0	0
siR99828	AGAAAACACAGTAGGGGTAGAAGA	24	0	0	0	0	0	0	122.411	0	0	0				13106.m02474_intr2-antisense
siR100017	AGAAAAGTTGCATACCTCTGGAGA	24	11.0886	0	0	1.8888	0	0	13.6486	0	21.1833	0						LOC_Os08g08900.1|13108.m00933|1000bp_UpstreamSeq|5175491..5176493
siR100049	AGAAAATATTGGGCACAGGAATGG	24	0	0	0	0	0	0	7.84792	15.3413	0	0			13102.m03185_exon2-sense
siR100161	AGAAACAACGAGTAGAATGAGAGG	24	4.07049	2.85771	0	0	0	14.4453	11.7719	0	2.65497	0
siR100360	AGAAACGGATCACTGAGTGGAATC	24	0	32.5629	15.0281	0	10.6958	0	12.9661	44.6925	72.9835	0
siR100396	AGAAACTAAGGCTGTGTTCGTTGG	24	0	0	0	0	0	0	80.5265	40.572	0	0
siR100481	AGAAAGACGCAACCGCACTCTAAT	24	1.68434	2.4817	0	0	0	10.1461	9.554	7.48045	2.59848	0	LTR/Copia:1
siR100483	AGAAAGACGGAGATGAAATTGCTG	24	0	0	0	0	0	0	12.1131	14.5172	0	0
siR100487	AGAAAGACGTCTCATCAACTTTGT	24	4.21085	0	0	0	0	0	10.5776	0	3.67177	0
siR100507	AGAAAGAGGGAGATGTAGGCGAGC	24	0	0	0	0	0	0	19.961	0	0	0			13106.m05162_exon3-sense
siR100516	AGAAAGATATGACTGCATAGTATG	24	0	0	0	0	0	12.5536	14.2457	9.88941	0	0
siR100530	AGAAAGCACTAACAATTCTGGTCA	24	8.91297	0	0	0	0	21.7539	27.809	17.56	0	4.7731
siR100551	AGAAAGCCTAAGACTGCATAGCCA	24	54.1094	0	0	0	0	255.63	197.819	183.208	40.446	46.8631						LOC_Os12g09060.1|13112.m00961|1000bp_UpstreamSeq|4735236..4734234
siR100563	AGAAAGCGAGGCAGTACGGTTCTG	24	0	0	0	0	0	19.1744	0	0	0	0
siR100590	AGAAAGGAACCACCGATGACGACG	24	0	0	0	0	0	151.676	0	0	0	0	LTR/Gypsy:0
siR100592	AGAAAGGAATGAATTGAAGGATGG	24	0	0	0	0	0	53.224	0	24.4066	12.4275	0
siR100724	AGAAATACGACATGAGAAAGACGA	24	0	8.12192	0	0	0	0	0	39.6211	0	0
siR100736	AGAAATAGATAGTCTCGGACATAA	24	0	4.96339	0	0	0	11.6078	0	7.79742	7.73896	1.80799
siR100737	AGAAATAGATAGTCTCGGACGTAA	24	0	0	0	0	0	0	0	11.0305	9.43362	2.89279
siR100839	AGAAATCCTCTGATTGTAATGTGC	24	4.28103	2.6321	1.93344	0	0	0	0	0	10.3939	0						LOC_Os09g10570.1|13109.m00930|1000bp_UpstreamSeq|5770170..5769168
siR100973	AGAAATTAGAACAGCAGCCAATAA	24	0	0	0	0	0	27.6868	0	0	0	0
siR101032	AGAACAAAACACGACAGAAACTCA	24	12.1413	6.54266	0	2.74734	1.50117	0	0	23.9628	13.5008	9.76315
siR101059	AGAACAACATTGATCTCGGCCATG	24	0	4.81299	0	0	0	0	12.7102	0	0	0
siR101071	AGAACAACGCTGCAAGCAGGGCCG	24	0	0	0	0	0	0	0	12.4252	0	0
siR101079	AGAACAAGAGAGAGCCAATTTGAG	24	0	0	0	0	0	17.9706	0	0	0	0
siR101120	AGAACACATTCAAGATCGCCTCAC	24	0	0	0	0	0	38.6068	0	21.2369	0	0
siR101139	AGAACACCTGATGCTGATAAGATG	24	0	3.83535	0	0	0	35.0814	26.7	0	0	0
siR101144	AGAACACGGCCTTTCATCCTCAGC	24	0	1.05284	0	0	0	14.6173	0	0	0	0
siR101152	AGAACACTGTAGGTGCCGCCAAGC	24	0	0	0	0	0	20.2062	0	0	0	0
siR101164	AGAACAGAGGTAGAGGTTGTTGGT	24	5.96537	2.6321	0.790953	0	0	17.2828	18.8521	7.73403	4.80154	0				13108.m01397_intr4-antisense
siR101205	AGAACATACTCCATTGCAGCCTAC	24	1.8247	1.57926	0.351534	0	0	12.9836	9.554	6.21258	3.21986	1.37407					13108.m02607_intr2-sense
siR101335	AGAACCCAACGAAATGATCGTCTT	24	58.3905	57.1542	0	0	0	52.7081	56.6415	16.4824	92.0767	6.72573
siR101343	AGAACCCACAACCAAAGACTTTCA	24	0	3.53454	0	0	0	15.1332	0	9.63584	0	0
siR101376	AGAACCGAGAGAAATCAAGACTGA	24	6.38646	4.36177	1.14249	0	0	13.3275	14.331	0	0	0
siR101435	AGAACCGTCGAACATATGGCGTCA	24	28.0022	10.1524	0	0.429272	0	15.5631	0	13.1859	0	0						LOC_Os01g19300.1|13101.m02099|1000bp_UpstreamSeq|10923332..10922330
siR101438	AGAACCGTTGGGTGGTGACCGGCA	24	0	0	0	0	0	0	0	0	15.0825	0
siR101448	AGAACCTATCCGAAGTCGTAGGAC	24	112.149	0	0	0	0	0	248.233	0	0	0
siR101472	AGAACCTGGATGGTAGGAAATTTC	24	0	0	0	0	0	0	0	0	13.5573	0			13102.m03185_exon2-sense
siR101475	AGAACCTGGCAGCCGCATCTCCAA	24	0.84217	0.601624	0	0	0	10.834	4.69169	4.24738	1.63817	0
siR101491	AGAACGAAGTTCGGCAGCCATCCC	24	0	0	0	0	0	0	11.4307	0	0	0	LINE/L1:0
siR101589	AGAACGGAGCCAGCGACCTTAGAC	24	0	0	0	0	0	11.0059	9.21278	0	0	0		13108.m01397_exon3-antisense
siR101609	AGAACGGGGTGGTAGTCAATGGCC	24	0	0	0	0	0	10.662	0	0	0	0						LOC_Os07g33470.1|13107.m03400|1000bp_UpstreamSeq|20001486..200024
siR101648	AGAACTAAGAACTGATGAGCAGCA	24	0	0	0	0	0	61.7364	0	0	0	0
siR101655	AGAACTACACAAGATGAAGAACTA	24	0	12.6341	0	0	0	26.2251	0	0	0	0					13108.m01648_intr1-sense
siR101717	AGAACTCCACTGGCATGTTTAATG	24	2.9476	2.10568	0	0	0	14.6173	12.6249	12.7421	4.68857	2.67583
siR101766	AGAACTCTTCCCGCAAAGCAGAAT	24	3.01778	0	0	0	0.938228	0	2.55911	10.143	5.42292	2.9651			13101.m01408_exon2-sense
siR101799	AGAACTGCTTGTATTATTCGGACC	24	0	2.40649	0	0	0	0	11.6013	7.73403	0	0
siR101845	AGAACTTCTGGATGGTAGAGAACA	24	46.6703	0	16.6979	0	14.4487	0	54.5943	150.18	63.6628	38.5464		13102.m01414_exon7-antisense
siR101851	AGAACTTGAGTGCCTACATCATCC	24	0	0	0	0	0	40.5844	29.515	0	11.4107	0						LOC_Os11g28370.1|13111.m02728|1000bp_UpstreamSeq|15869584..158705
siR101864	AGAACTTGTATGGACAGAGGGAGT	24	0	0	0	0	0.562937	0	4.26518	14.2636	0	3.76062		13101.m07147_exon1-antisense
siR101884	AGAAGAAAATAGAACAGCAACATC	24	0	21.132	0	0	0	0	0	0	26.7192	10.8479				13111.m00819_intr3-antisense
siR101908	AGAAGAAATCAGAAGCCTGTGCAG	24	0	0	0	0	0	0	0	15.4681	2.76795	0.433918
siR101924	AGAAGAACATTGGGCCGATCATAA	24	0	0	0	0	0	15.6491	0	9.76263	0	0
siR101970	AGAAGAAGGGCGAGTGACCAGCAG	24	0	0	0	0	0	22.0979	14.4163	0	0	0
siR101975	AGAAGAAGTAGTAGCTGTCCACCA	24	11.9307	0	0	0	0	0	0	0	0	0
siR101983	AGAAGAATGAAAGAGCTAACTTAC	24	0	2.10568	0	0	0	0	16.0371	6.84652	0	0				13101.m02191_intr2-antisense
siR102006	AGAAGACACAAACAATCGCGAACA	24	35.0904	0	0	0	0	0	0	53.3775	36.3788	0
siR102037	AGAAGACCACGTAGTACACCGCGA	24	5.54429	0.827232	0.263651	0	0	0	4.09457	14.7073	3.10688	0.867836		13107.m05009_exon2-antisense		13107.m05009_intr2-antisense
siR102048	AGAAGACCCTACTCTGTGTTATCG	24	42.9507	20.0792	0	0	0	118.658	121.216	82.3484	32.481	0
siR102071	AGAAGACGACTGTAAAGTTCCATG	24	0	0	0	0	0	0	0	12.1082	0	0
siR102113	AGAAGACTCTACCGGTGACGCTGG	24	0	0	0	0	0	25.4512	0	0	6.21376	0					13112.m04157_intr1-sense
siR102134	AGAAGAGAGCAGCGTCGGGGTAGA	24	0	0	0	0	0	10.0601	0	0	0	0			13101.m04572_exon1-sense
siR102137	AGAAGAGAGCGGTCTAATCACTCA	24	6.17591	0	0	0	0	0	6.90959	10.7769	6.94812	3.03742					13108.m03738_intr1-sense
siR102144	AGAAGAGATCATCAGTAGAAGTGT	24	6.66718	1.42886	0	0	0	27.3429	25.2498	7.22688	1.75115	0
siR102213	AGAAGAGCTCCTGGTTATTAGCAT	24	0	0	0	0	0	0	0	17.1163	0	0
siR102245	AGAAGAGTGTAATATGCCTAAACG	24	7.15845	3.15852	2.10921	1.71709	1.12587	0	6.56837	14.1368	7.28705	4.19454
siR102274	AGAAGATCAACTGCATTGAAAGAA	24	2.31597	1.72967	0	0	0	10.748	0	2.21878	0	0						LOC_Os12g40000.1|13112.m04157|1000bp_UpstreamSeq|24697598..24696596
siR102326	AGAAGATGAAATCTGCAATGCCAA	24	0	0	0	0	0	0	63.3805	0	0	0			13106.m05162_exon1-sense
siR102358	AGAAGATGGATGGGCCAAATGCTA	24	0	0	0	0	0	36.7151	23.9703	32.521	11.0153	0
siR102375	AGAAGATTAACAAGACCGCAACAA	24	0	6.61786	0	0	0	66.7235	0	39.1139	0	0					13108.m02607_intr7-sense
siR102401	AGAAGCAACAGAACTGAAATAGAT	24	0	0	0	0	0	0	11.6866	0	0	0						LOC_Os11g40780.1|13111.m04045|1000bp_UpstreamSeq|23925288..23924286
siR102429	AGAAGCACTAAGGCGGGTCTGTCG	24	11.4395	3.83535	0	0	0	25.1073	33.439	5.89561	11.4107	0
siR102436	AGAAGCAGAAGGAAGAACAGCTCC	24	0	0	0	0	0	0	0	14.4538	0	0			13109.m00187_exon1-sense
siR102457	AGAAGCAGTGATCTGGTGTAGTTG	24	11.3693	5.56502	0	0	0	65.3477	53.6559	29.4147	10.6764	0					13108.m02607_intr6-sense
siR102548	AGAAGCCTCGCTGGATTGGATTGT	24	0	0	0	0	0	0	16.0371	0	0	0				13107.m00837_intr4-antisense
siR102640	AGAAGCTGAAGCTGGACTTGTTGT	24	20.1419	0	0	0	0	67.4114	58.9447	44.5658	23.1039	0
siR102656	AGAAGCTGCCGACCTACAACAAGC	24	2.10543	1.27845	0	0	0	11.3499	5.63003	6.21258	2.31604	0
siR102676	AGAAGCTGTTATGCTAGTCGTCTG	24	0	0	0	0	0	0	0	0	0	11.0649						LOC_Os12g40000.1|13112.m04157|1000bp_UpstreamSeq|24697598..246965
siR102698	AGAAGCTTCTTCAGTCGGGACTGT	24	5.96537	0	0	0	0	16.7669	0	6.14919	5.14048	0			13102.m02562_exon7-sense
siR102716	AGAAGGAACAGAGCAGTGAAGTAG	24	9.26387	1.50406	0	0	0	18.8305	18.5962	15.9752	1.58169	0
siR102778	AGAAGGCACCTGTCAAATACTTGC	24	3.78977	3.45934	0.878836	0	0	18.7445	16.6342	13.693	7.90843	2.16959
siR102782	AGAAGGCACCTGTCATACTTGCAA	24	7.50935	0	0	0	0	0	24.738	0	0	0
siR102829	AGAAGGCGTATCCGTATCTGTTCA	24	9.96568	6.09144	0	0	0	57.1793	51.6086	38.163	13.1054	5.85789			13107.m00837_exon6-sense
siR102838	AGAAGGCTAGTTGGTGATCAGTCG	24	3.15814	0	0	0	0	10.92	21.6671	2.72593	3.10688	0
siR102869	AGAAGGGGAGTAGGCTGCAGCTAT	24	6.66718	0	0	0	0	50.3006	36.3393	0	3.55879	0.723196
siR102923	AGAAGGTGAAGTGGACATAATTTT	24	0	3.76015	0	0	0	10.3181	0	5.13489	0	0
siR102986	AGAAGTACGACGATGACCACAATG	24	0	0	0	0	0	0	0	0	42.7055	0
siR103029	AGAAGTAGGCATATGGCAATCGAA	24	3.43886	2.5569	0.790953	0	0	15.5631	11.0042	9.57245	3.67177	0
siR103058	AGAAGTATTAGGAAACTTTGGCAT	24	0	0	0	0	0	30.8682	0	0	0	0
siR103207	AGAAGTGGCCACAGAACCTCATGC	24	7.79007	4.51218	0	0	0	32.8458	29.3444	25.6744	0	2.60351
siR103423	AGAATACGCAGATCTAGGTGCCCG	24	0	0	0	0	0	0	18.4256	0	0	0
siR103439	AGAATACTGGAGACAATCATAACT	24	60.917	0	0	0	0	202.32	210.188	0	125.744	0
siR103446	AGAATAGAAAGGAACCACCGATGA	24	0	1.80487	0	0	0	13.0695	0	6.40276	0	0	LTR/Gypsy:0
siR103596	AGAATCAATTGGAGGAGGAAACAC	24	0	0	0	0	0	10.662	8.01853	0	0	0
siR103604	AGAATCAGAGTTGAGGTGGAGACG	24	0	0	0	0	0	0	0	18.0038	0	0
siR103703	AGAATCGAACTGTGCATCAACTAG	24	11.9307	0	0	0	0	26.569	37.9601	0	0	0	LTR:0
siR103801	AGAATGACTAAACCAACCTAACGA	24	0	0	0	0	0	20.4642	23.2026	0	0	0				13106.m02114_intr1-antisense
siR103827	AGAATGAGTAAGGGACAAATGGTA	24	10.9482	0	0.96672	0	0	63.2841	34.9744	17.2431	13.6138	2.02495			13108.m02607_exon3-sense		13108.m02607_intr3-sense
siR103948	AGAATGGATACAACTGGTAGCGGA	24	0	1.35365	0.351534	0	0	10.49	8.61566	2.66253	2.0336	0.506237				13112.m00961_intr1-antisense
siR103983	AGAATGTACGCTGTGTTATTTGAT	24	0	6.24185	0	0	0	18.3146	0	0	0	0
siR104077	AGAATTAGGGAGCAAGTATGGATC	24	0	0	0	0	0	0	0	28.1468	0	0					13108.m02607_intr3-sense
siR104093	AGAATTATTGTGCGGCTCATCCCT	24	0	0	0	0	0	0	42.6518	0	20.1665	0
siR104134	AGAATTGAGAACAAAAACTGCATG	24	0	0	0	0	0	0	0	189.61	0	0					13107.m00953_intr2-sense
siR104331	AGACAACAGAGATTTGGCCTGGTA	24	0	0	0	0	0	11.6938	10.407	0	0	0
siR104428	AGACAAGCGACCGAAGAACGTGTG	24	66.8823	36.2478	0	0	0	0	96.9048	225.618	86.5408	0
siR104433	AGACAAGGACCTATTTAGATTGCA	24	14.8783	8.72354	0	0	0	0	0	0	0	0
siR104514	AGACAATGGTAGGAGAAGGACACA	24	0	0	0	0	0	0	11.9425	0	0	0	LINE/L1:1		13108.m01378_exon2-sense		13108.m01378_intr2-sense
siR104530	AGACAATTGGGCTTGGCTACTTCC	24	0	0	0	0	0	65.1758	0	0	0	0						LOC_Os12g09060.1|13112.m00961|1000bp_UpstreamSeq|4735236..4734234
siR104602	AGACACATGTTCTCAGAAGCTTCT	24	5.19338	5.64022	0.703069	0.343418	0	14.8752	8.61566	12.5519	4.91452	2.31423			13102.m02562_exon7-sense
siR104677	AGACACGATTAACGAGGATTGGTG	24	15.51	8.34753	0	0	0	39.8965	46.661	0	24.5726	0
siR104682	AGACACGCAGAGCAGCAGATCACA	24	0	0	0	0	0	0	0	26.562	11.2978	0
siR104984	AGACATCGGTAGGAGGGCAGCAGA	24	0	0	0	0	0	33.3617	0	0	0	0
siR105029	AGACATGCTGACACGACTGGATGA	24	6.597	0	0	0	0	23.5596	26.9559	12.0448	0	0				13108.m01397_intr4-antisense
siR105102	AGACATTTCAGAGAACAACGGAAG	24	0	0	0	0	0	268.27	161.991	0	0	0	LTR:0
siR105114	AGACCAAAACAACGAAGAGCAGGG	24	0	7.21948	0	0	0	92.8626	68.2428	60.1606	15.5344	0
siR105122	AGACCAAAGCTCAAGCGACTTCAA	24	11.4395	0	2.19709	0	0	65.3477	45.8933	35.1835	15.9863	7.015
siR105390	AGACCGAGCTGCACTAGAAGGATC	24	0.982532	0	0	0	0	20.1202	0	0	2.9939	0
siR105927	AGACGAAGTTAGAGGACTCAGGCT	24	0	0	0	0	0	0	199.354	0	0	0	LTR/Gypsy:1
siR106133	AGACGACGACGCAGTAAAAGAACA	24	6.31628	6.54266	2.72439	1.71709	1.68881	0.257952	5.63003	13.5662	9.26416	4.0499
siR106163	AGACGACGATTACTACTGGTGGCT	24	16.9136	0	1.23037	0	0	0	19.6198	22.7583	10.9023	0.795516
siR106223	AGACGACTAACCATAATACTGCGT	24	27.5109	12.4837	0	0	0	81.1688	76.2614	46.0872	15.5344	0
siR106277	AGACGAGAATGAACGAGAATACGG	24	0	1.88007	0	0	0	35.9413	24.9939	19.5886	1.63817	0.940155
siR106292	AGACGAGATTGTGCATAGCCTACC	24	93.2703	71.4428	0	0	22.7051	0	37.7895	151.004	184.266	78.3945
siR106489	AGACGATCCTAGCAGAGCTTCATC	24	16.0012	9.32517	0	1.20196	0	45.8294	41.7987	32.3942	15.8169	4.84542	LTR/Gypsy:0
siR106595	AGACGATGCGAGGAAGCTAACCTG	24	0	0	0	0	0	10.748	10.3217	0	0	0
siR106616	AGACGATGGGGTGGGCTGGCGCAT	24	0	0	0	0	0	0	24.3115	0	0	0				13108.m02607_intr4-antisense
siR106795	AGACGCGCGGAGGCAGAAGGATGT	24	0	8.04672	0	0	0	136.542	0	66.0562	0	0	DNA/MuDR:1
siR106810	AGACGCGTGGTTTCTGTTCGTGGT	24	68.9176	39.7824	0	0	0	187.101	210.614	79.8126	95.9179	30.0126
siR106848	AGACGGAAGGGGAAAATCCACGGA	24	0	0	0	0	0	26.655	0	0	0	0
siR107034	AGACGGTCAGGCGAGGTGGAGACG	24	6.17591	0	0	0	0	96.13	57.2387	34.6129	4.63208	0						LOC_Os06g23010.1|13106.m02474|1000bp_UpstreamSeq|13426643..13427645
siR107056	AGACGGTGGCCTCAATCTGTTGCA	24	5.75483	3.23373	0.878836	0	0	20.2922	32.6713	10.143	5.14048	1.80799
siR107159	AGACGTCCTAGAGCAGATACGAAG	24	10.9482	4.51218	0	0	0	32.5879	21.923	27.3861	7.73896	4.55614						LOC_Os11g28370.1|13111.m02728|1000bp_UpstreamSeq|15869584..15870586
siR107188	AGACGTCTCGCTGTAGTTGGGTGG	24	0	0	0	4.29272	0	0	0	37.2121	0	0
siR107198	AGACGTGAGTGGGAAGACTAATGG	24	35.5817	18.0487	5.3609	0	0	135.081	103.814	60.6044	41.9147	0						LOC_Os06g19790.1|13106.m02114|1000bp_UpstreamSeq|11301571..11302573
siR107301	AGACTAAGAAGACTCTACCGGTGA	24	0	0	0	0	0	305.157	0	0	45.078	0					13112.m04157_intr1-sense
siR107368	AGACTACCAAGCACTGACAACCGC	24	3.6494	1.50406	0	0	0	21.496	0	14.4538	4.46261	2.67583					13107.m00837_intr2-sense
siR107430	AGACTAGCATATCGGACATGGTGA	24	0	0	0	0	0	0	0	0	16.3817	0
siR107486	AGACTATCGGGAGCATGTTGATGT	24	12.2115	0	0	0	0	0	0	0	0	0
siR107500	AGACTATGGTCCATGGACAAGACG	24	0	0	0	0	0	100.773	0	0	0	0
siR107537	AGACTCATACAGTCAGGAGGATCA	24	0	0	0	0	0	0	22.9467	9.63584	9.60309	0					13101.m02191_intr1-sense
siR107586	AGACTCCGAACTAAGAAGTGCAAA	24	0	0	0	0	0	16.079	11.7719	0	0	0
siR107617	AGACTCGCTACAAAGACCTGGCCG	24	0	0	0	0	0	28.5466	0	0	0	0	LTR/Gypsy:0					LOC_Os11g37770.1|13111.m03701|1000bp_UpstreamSeq|21875588..21874586
siR107728	AGACTGATTGCCGCATACATGTTT	24	3.6494	2.10568	0	0	0	12.4677	8.70096	6.46616	2.59848	1.22943
siR107820	AGACTGGTGTTGATGGGCTGCAAC	24	0	0	0	0	0	0	0	14.7073	0	0			13105.m01987_exon3-sense
siR107835	AGACTGTATTTTGAGGGTATTGGG	24	0	0	0	0	0	0	12.0278	0	0	0	LTR/Gypsy:0
siR107899	AGACTTACCAACAGAAGGACCTGC	24	0	0	0	0	0	0	2.55911	13.4395	0	7.3766
siR108181	AGAGAAACTAGACGAAACAGACAG	24	0	0	0	0	0	0	0	0	17.2291	0
siR108343	AGAGAAGGAACAAGGAGGACAGGA	24	0	3.38413	0	0	0	85.8119	0	38.0362	4.74506	0	LTR/Gypsy:1
siR108437	AGAGAATGGTTGTACATGTCGTTG	24	0	0	0	0	0	0	0	12.1082	8.24736	0				13105.m03221_intr2-antisense
siR108558	AGAGACAGATGTGTATGAGGACCC	24	0	0	0	0	0	15.993	0	0	0	0			13101.m02191_exon4-sense
siR108718	AGAGACCTACTAGACTAGTACGCC	24	0	0	0	0	0	50.3866	0	0	0	0
siR108728	AGAGACCTGACCTGATAAGAGAGA	24	0	0	0	0	0	0	45.0403	0	0	0					13101.m02100_intr2-sense
siR108736	AGAGACGAACACTCCGATCAATGA	24	0	0	0	0	0	20.4642	31.1358	0	0	0
siR108740	AGAGACGAAGTTCAAAAAGGAATC	24	2.9476	3.98576	1.31825	0	0	10.2321	9.38339	7.86082	5.59239	1.66335						LOC_Os01g20170.1|13101.m02191|1000bp_UpstreamSeq|11470443..11471445
siR108809	AGAGACGCCTATGATAACTTTGTC	24	0	0	0	0	0	0	15.0134	0	0	0
siR108818	AGAGACGGAGAGACAATGCAAATC	24	0	0	0	0	0	12.8976	0	0	0	0
siR108832	AGAGACGTACTTCACCTTCACCCA	24	4.14067	2.33129	0.175767	0	0	14.7892	10.407	8.68493	3.44581	2.02495
siR108881	AGAGACTGTCTATTATACATCATG	24	0	0	0	0	0	0	61.2479	0	0	0
siR109209	AGAGATACAGAATGGTAGAAGGAG	24	0	0	0	0	0	0	0	0	12.2016	0
siR109244	AGAGATAGTTGAGACGACTTCAGC	24	0	0	0	0	0	0	23.5438	0	0	1.37407
siR109270	AGAGATATGCGGATGATTAACAGA	24	13.194	7.82111	0	0	0	24.5914	29.8562	19.3351	13.7268	3.90526
siR109379	AGAGATCTTATTTGGACTTTGGTA	24	0	0	0	0	0	0	13.0514	0	7.0611	0
siR109458	AGAGATGGAATGAGCAAGAAACAC	24	0	0	0	0	0	0	16.4636	0	0	0
siR109477	AGAGATGGTAAGCCTGTGAAAATG	24	0	0	0	0	0	0	13.3927	0	0	0				13101.m00787_intr1-antisense
siR109500	AGAGATGTGGTGTGTTTTTACTGG	24	0	0	0	0	0	0	0	0	24.2337	0
siR109554	AGAGATTGCATAAAGGACTTTTCC	24	0	0	0	0	0	0	0	0	13.1619	0	LTR/Copia:0
siR109585	AGAGCAAAAGATCCGAATTGAACC	24	0	0	0	0	0	48.237	0	0	0	0
siR109777	AGAGCATCGACAGTTGATTTGCGC	24	0	0	0	0	0	46.2593	0	0	0	5.71325						LOC_Os01g16630.1|13101.m01861|1000bp_UpstreamSeq|9436432..9437434
siR109806	AGAGCATGTGAACACAAACCGGAG	24	23.3	0	0	0	0	0	0	0	0	0
siR109873	AGAGCCCTTGCTTTGTCAGTACTG	24	2.10543	0	0	0	0	12.0377	9.12748	6.84652	2.37253	0					13106.m02474_intr2-sense
siR110090	AGAGCTAGGGCATATTGTAGAAAA	24	37.9678	0	0	0	0	0	23.9703	73.9804	74.3392	0
siR110117	AGAGCTCACACATGGACGGTCCTG	24	0	0	0	0	0	51.6763	0	23.0119	0	0
siR110145	AGAGCTCGTAGAAGAAAGCAATGT	24	0	0	0	0	0	0	0	158.104	0	0
siR110186	AGAGCTGGACGGGATGTACTACTT	24	0	0	0	0	0	13.3275	0	0	0	0	DNA/En-Spm:0
siR110226	AGAGCTTGCATGCTAGGAACTCAT	24	0	2.85771	0	0	0	9.20028	10.0658	6.90991	4.5191	0				13106.m02474_intr2-antisense
siR110234	AGAGCTTGGAACAATGAAGAGTGA	24	159.17	0	0	0	0	284.263	337.717	387.716	0	128.729				13108.m02607_intr2-antisense
siR110288	AGAGGAAGCGAGCCGGCTGTATTG	24	0	0	0	0	0	0	3.15623	11.1573	0	0
siR110310	AGAGGAATAGAACCAAGTCATCGG	24	0	0	0	0	0	0	49.3054	0	0	0	LINE/L1:0
siR110381	AGAGGACGAGCGCAACGAGTACAC	24	1.05271	0.376015	0	0	0	16.165	8.18914	7.16349	1.12978	0.867836			13106.m05162_exon3-sense
siR110400	AGAGGACTCAGGCTTATACCCCAG	24	0	0	0	0	0	0	162.589	0	0	0	LTR/Gypsy:1
siR110418	AGAGGAGAGCTAGCATAACTGTGT	24	0	0	0	0	0	0	0	26.0548	0	0
siR110441	AGAGGAGCTTTTGGTAGATGCAAC	24	0	0	0	0	0	0	5.63003	14.8975	0	0
siR110451	AGAGGAGGCGGCGACTGCATCTGG	24	0.912351	0	0	0	0	12.5536	10.6629	0	0.0564888	0.0723196
siR110499	AGAGGATAGATCTGTGAAGGCTAA	24	0	24.5914	0	0	0	0	0	0	0	0			13111.m00819_exon6-sense
siR110520	AGAGGATCCCAGTTAGAAACATGA	24	0	0	0	0	0	11.1779	9.38339	3.67683	3.27635	0.216959
siR110545	AGAGGATGCAGACAAGACCATTGG	24	0	0	0	0	0	0	0	12.0448	0	0
siR110639	AGAGGCAGAAAGTAGCATGAGTGG	24	0	0	0	0	0	137.832	0	0	0	0
siR110642	AGAGGCAGAAAGTAGTATGAGTGG	24	50.7408	19.4024	0	0	0	201.976	0	84.694	0	10.3417
siR110643	AGAGGCAGAAGAGTGGGGACTAAG	24	1.8247	0	0	0	0	11.3499	0	0	0.960309	0
siR110746	AGAGGCGAAAGAAGTAGGCAGCAG	24	0	0	0	0	0	14.7032	0	0	0	0				13105.m00973_intr1-antisense
siR110848	AGAGGGCAGGATAGAAGAGGCGCT	24	0	0	0	0	0	30.8682	0	0	0	0
siR110878	AGAGGGCTTCAGAACACCATCAAC	24	0	0	0	0	0	0	80.6118	0	0	0
siR111008	AGAGGTCAGGTAATGCTCGTTATC	24	2.59669	0	0	0	0	16.4229	12.369	5.95901	4.74506	1.22943			13102.m02562_exon2-sense		13102.m02562_intr2-sense
siR111112	AGAGGTGCGTACTGATGACAACGG	24	0	0	0	0	0	0	0	0	37.3391	0
siR111186	AGAGGTTGGGATTCATGGTATAAA	24	3.08796	0	0	0	0	10.0601	7.84792	0	0	0
siR111246	AGAGTAAGGGACGGTGACTGCAGC	24	0	0	0	0	0	0	0	15.5948	0	0
siR111280	AGAGTACTCGATTTCATGAAGACA	24	26.0371	0	0	0	0	174.375	132.647	0	0	4.0499					13106.m02474_intr2-sense
siR111567	AGAGTCTTCTTAGTCTCGTCGCTC	24	0	0	0	0	0	0	10.0658	0	2.59848	0				13112.m04157_intr1-antisense
siR111579	AGAGTGAATTTTGCAGCAAATGGG	24	0	4.96339	0	0	0	31.6421	21.2406	15.7216	0	0
siR111630	AGAGTGCCTAGTAGCGGAGTCGGG	24	2.17561	0	0	0	0	13.1555	11.4307	0	2.14657	1.08479
siR111823	AGAGTTGAGTCCAAGGCGGTCGAG	24	3.93013	1.05284	0.175767	0	0	15.735	9.12748	3.9938	0	0.289279		13108.m02607_exon7-antisense
siR111995	AGATAACATACCTTGAACCAGCAA	24	0	0	0	0	0	0	4.69169	15.2779	0	0		13103.m07097_exon9-antisense		13103.m07097_intr9-antisense
siR112104	AGATAATGAAGAAGTCTAGGATGG	24	0	0	0	0	0	33.1898	0	14.327	0	0				13105.m01987_intr2-antisense
siR112283	AGATAGACCAAAGCTCAAGCGACT	24	24.5633	0	2.81228	0	0	98.6235	0	59.1463	16.4947	3.90526
siR112435	AGATATAAGCAGTTGGATGGTGTC	24	0	0	0	0	0	83.1464	0	0	0	0
siR112542	AGATATCTAGAACACTTGATGAGC	24	4.21085	0	0	0	0	0	13.3074	0	0	0
siR112554	AGATATCTTTTCTTGCATCGTTGG	24	0	17.5975	0	0	0	0	0	57.815	52.817	0
siR112585	AGATATGCGGATGATTAACAGAGA	24	0	0	0	0	0	16.5949	0	8.93851	5.87483	0
siR112801	AGATCACTGCTTCTCTCACCCATA	24	1.61416	0.827232	0.175767	0	0	11.3499	6.99489	6.21258	1.63817	0.650877				13108.m02607_intr6-antisense
siR112840	AGATCATAACGAGGACGCCGCTGC	24	0	0	0	0	0	20.2922	15.0987	7.79742	2.71146	0		13110.m02650_exon2-antisense
siR112843	AGATCATAGTCGCGTGGACGGCCG	24	0	0	0	0	0	0	22.9467	0	0	0
siR113041	AGATCCGGAACACATACATTGAGC	24	3.85995	0	0	0	0	10.0601	9.98051	8.30457	4.5191	0
siR113048	AGATCCGGCCGGCTAGCAGTAGAG	24	9.5446	6.54266	0	0	0	31.4701	35.4863	0	11.2413	0
siR113144	AGATCCTTTTGGTGTAGCTCGGTC	24	16.9838	9.32517	4.13053	0	0	85.6399	73.4463	36.9585	18.6978	8.75068						LOC_Os06g48550.1|13106.m05162|1000bp_UpstreamSeq|29375998..29377000
siR113232	AGATCGGACACACTACAAGCAGCA	24	31.8621	10.5284	0	0	0	0	41.4575	37.1487	0	3.61598
siR113253	AGATCGGTTTGGGAGATATGGTAC	24	0	4.66258	0	0	0	21.7539	21.6671	12.0448	0	1.01247
siR113592	AGATGAAGAACATGACAAGGCAGG	24	0	0	0	0	0	0	5.97125	14.8975	55.1895	10.3417			13107.m00265_exon2-sense
siR113672	AGATGACACCAACAAGTATTCTGA	24	9.5446	4.58738	0	0.343418	0	11.0919	12.7102	8.55815	8.75576	0
siR113752	AGATGACGAGACAGATGAATATGC	24	3.01778	1.95528	0.615185	0	0	13.5855	6.56837	5.89561	2.65497	0.940155			13112.m00961_exon7-sense
siR113869	AGATGACGTAGGCTGCTGTGTAAC	24	13.5449	6.39225	0	0	0	72.3124	64.6601	59.0195	0	5.56861
siR113907	AGATGACTGCAACATAGACCACAT	24	38.1784	0	0	0	0	0	0	0	0	0
siR113935	AGATGAGATGTATGCGGTTGGATG	24	3.57922	0	0	0	0	15.821	0	8.24118	4.23666	0.940155			13112.m00961_exon1-sense
siR114056	AGATGATGGCTTGCATTCTAGATG	24	5.26356	0	0.790953	0	0	48.5809	27.6383	25.8012	6.10079	1.15711				13108.m02607_intr1-antisense
siR114092	AGATGATGTGTATGAGGAATGACA	24	0	0	0	3.00491	0	0	0	5.64204	12.2016	0
siR114168	AGATGCAGAACTAGTTAAGGGTGA	24	5.54429	0	0	0	0	21.324	19.2786	12.7421	9.99851	0			13112.m00961_exon3-sense		13112.m00961_intr2-sense
siR114368	AGATGCGGCGAAGGATTGACAACA	24	0	0	0	0	0	0	10.6629	0	0	0
siR114433	AGATGCTCTAAGCTGGTTGTCGTT	24	32.0025	0	0	0	0	72.9143	98.2697	26.3084	29.939	7.30428
siR114500	AGATGGAACGAGCAAGAAACACGC	24	0	0	0	0	0	6.62076	0	0	11.8626	0			13106.m05162_exon1-sense
siR114635	AGATGGGAAACGATGGCGAAAAGG	24	8.49188	0	0	0	0	0	0	4.81792	10.3939	1.22943			13109.m02307_exon1-sense
siR114767	AGATGTACGAAGTTATAACCCTGA	24	19.2997	12.4837	0	0	0	69.0451	68.84	38.4166	23.3863	0		13106.m02474_exon2-antisense
siR114798	AGATGTAGGCGAGCTGAGTTACCA	24	0	0	0	0	0	12.2957	7.93323	0	2.14657	0			13106.m05162_exon3-sense
siR114833	AGATGTATGCGGTTGGATGGTGTC	24	4.63194	0	0	0	0	35.8553	27.4677	17.1163	0	0			13112.m00961_exon1-sense
siR114992	AGATGTGTGGTTCAAGGCGATGTC	24	0	0	0	0	0	21.152	0	0	0	1.37407		13105.m04596_exon2-antisense
siR115084	AGATGTTTGCATATGGTCGTCTGG	24	131.238	68.7355	0	0	0	211.778	243.968	59.5901	124.671	13.813
siR115102	AGATTAACAAGACCGCAACAACCT	24	0	0	0	0	0	49.4407	0	25.4209	8.24736	0					13108.m02607_intr7-sense
siR115203	AGATTATCCCATGGTAGCTAGACA	24	1.8247	0	0	0	0	10.2321	10.2364	6.14919	0	0
siR115214	AGATTATGATAGCACACTTTCACC	24	0	0	0	0	0	18.2286	0	0	0	0
siR115231	AGATTATTGCATGGCAAGGACTAC	24	0	0	0	0	0	12.8976	0	0	0	0
siR115270	AGATTCAGCGTTGGGACCAATAAA	24	0	0	0	0	0	26.9989	32.5859	14.9609	0	0				13108.m02607_intr6-antisense
siR115347	AGATTCCGGTAAGTACATAATGTA	24	4.07049	3.60974	0	0	0	15.5631	12.1131	9.82602	5.93132	2.31423			13108.m02607_exon5-sense		13108.m02607_intr5-sense
siR115470	AGATTCTGAAATCAAATCGGCTAC	24	0	0	0	0	0	0	51.3527	0	0	0	SINE:1
siR115487	AGATTCTGAGAAGCTGCAGCTGTA	24	0	0	0	0	0	0	0	13.1859	0	0	DNA/Tourist:0
siR115535	AGATTGACTCGCGTGGGAATCGGA	24	0	0	0	0	0	61.0486	0	0	0	0					13101.m02100_intr2-sense
siR115550	AGATTGAGTCCTCGCAACCCACCA	24	0	0	0	0	0	10.662	0	0	0	0						LOC_Os01g16630.1|13101.m01861|1000bp_UpstreamSeq|9436432..9437434
siR115716	AGATTGTAGAGCCGGCCCTGCTTG	24	2.38615	0.676827	0.439418	0	0	14.8752	12.0278	8.74833	1.5252	1.22943
siR115821	AGATTTAGCCACTGGTTCGTTGGA	24	5.75483	5.48982	0	2.91905	0	0	2.3032	6.78312	10.2245	4.19454		13111.m00819_exon1-antisense
siR115929	AGATTTGATGTGGCACAGAATACT	24	0	0	0	0	0	0	0	0	40.5024	0
siR116066	AGATTTTGGCCGACTCGTAGATGG	24	13.3344	0	0	0	0	0	8.70096	0	0	0		13104.m04542_exon7-antisense					LOC_Os04g45290.2|13104.m04543|3-UTR
siR116211	AGCAAAGACAGTGTTCCATAGATG	24	0	0	0	0	0	13.5855	10.9189	7.79742	0	0
siR116244	AGCAAAGGCTAAGACTACACCATA	24	18.1067	12.0325	0	0	0	71.6246	53.0588	41.3327	22.9909	0					13112.m00961_intr1-sense
siR116361	AGCAACAGGCATGAGGAGGTAGGT	24	7.86025	5.86583	0	0.343418	0	63.8	33.9508	40.8889	16.3253	7.88284					13106.m05162_intr1-sense
siR116461	AGCAACGGAGCACACTGATGGAAG	24	0	0	0	0	0	93.4645	77.285	0	0	0
siR116623	AGCAAGCATACTCTGAAGATTCAT	24	0	0	0	0	0	0	0	35.3737	0	0						LOC_Os11g28370.1|13111.m02728|1000bp_UpstreamSeq|15869584..15870586
siR116654	AGCAAGGAACGTTGGTAGCAGCAG	24	0	0	0	0	0	56.1475	0	0	0	0	LTR/Gypsy:0
siR116690	AGCAAGGGGCTTGGCACTGAAGGA	24	0	0	0	0	0	29.4065	0	0	0	0	LTR/Copia?:1
siR116740	AGCAAGTGGTATTTTTCTGATGGG	24	0	0	0	0	0	0	15.4399	0	0	0
siR116753	AGCAAGTTGCAAGTATGACAGGTG	24	3.93013	1.65446	0	0	0	10.2321	5.88594	4.88131	2.31604	0.289279
siR116852	AGCAATGCAAGACCGTAGTTAGTG	24	0	2.03048	0	0	0	16.4229	15.9518	7.0367	3.33284	1.08479
siR117104	AGCACATGAAGAATCAACCTCGGA	24	3.78977	0	0	0	0	0	18.5109	0	0	0
siR117185	AGCACCACAGCGGCACGTCGAGTC	24	0	0	0	0	0	12.2957	0	0	0	0						LOC_Os06g23010.1|13106.m02474|1000bp_UpstreamSeq|13426643..13427645
siR117289	AGCACCTACTAGAGCGAAGACCGA	24	0	0	0	0	0	0	0	0	19.6581	0			13112.m00960_exon2-sense
siR117310	AGCACCTTCCCCGTCGACCGTCGT	24	21.5455	15.2662	0	0	0	233.532	231.428	0	45.5864	0		13107.m00837_exon5-antisense
siR117389	AGCACGATGACGAATGACCAACCA	24	0.0701808	0	0	0	0	12.8116	7.84792	1.20448	0.112978	0.0723196
siR117422	AGCACGGAAGGGGTCAACAACTCA	24	0	0	0	0	0	11.0059	10.407	0	0	0					13107.m00837_intr4-sense
siR117629	AGCACTACTGAAGTTCGAGACATA	24	10.7377	7.97151	2.81228	0	0	36.4572	35.9981	23.3923	14.2352	4.84542
siR117764	AGCAGAAGATCTGTCCGCAAGATT	24	0	0	0	0	0	0	13.3074	0	0	0					13108.m02607_intr1-sense
siR117770	AGCAGAAGTCGATCGACGCAACTC	24	24.9142	0	0	0	0	146.431	0	0	0	0
siR117775	AGCAGAATAGAAAGGAACCACCGA	24	0	0	0	0	0	21.7539	10.4923	4.75453	0	0.723196	LTR/Gypsy:0
siR117789	AGCAGACAACTCAGGGATCACATG	24	0	0	0	0	0	10.662	11.6866	6.90991	2.93742	0
siR117798	AGCAGACATCGGTAGGAGGGCAGC	24	1.89488	0	0	0	0	12.1237	7.84792	4.24738	0	0
siR117806	AGCAGACCAGGTTGGACGGACGGG	24	0	0	0	0	0	0	13.3074	0	0	0
siR117845	AGCAGAGAAGGAACAAGGAGGACA	24	0	0	0	0	0	50.5585	0	0	0	0	LTR/Gypsy:1
siR117866	AGCAGAGCTTGGCACATTTCACGG	24	38.5293	0	0	0	0	0	0	0	0	0						LOC_Os07g36310.1|13107.m03732|1000bp_UpstreamSeq|21716619..21717621
siR117968	AGCAGCAACATGACGAGGACGATG	24	0	0	0	0	0	10.2321	0	0	0	0		13102.m03554_exon2-antisense				LOC_Os02g32780.1|13102.m03553|1000bp_UpstreamSeq|19464461..19463459
siR118198	AGCAGCTGACAGAATCAAAGGGTT	24	0	0	0	0	0	55.9755	0	35.5005	0	0					13112.m04157_intr1-sense
siR118258	AGCAGGACTACGGACGAAATCAGA	24	0	0	0	0	0	10.2321	0	5.70543	0	0
siR118320	AGCAGGGCCGGCTCTACAATCTTG	24	2.87741	0.601624	0.0878836	0	0	27.7728	10.4923	19.1449	1.63817	0.940155
siR118326	AGCAGGGGTAGAAGCGATCTTCAG	24	4.56176	0.75203	0	0	0	39.2946	28.2355	12.3618	1.5252	0.433918
siR118327	AGCAGGGGTAGAGTGAGTGATGGT	24	0	0	0	0	0	42.648	0	0	0	0	LTR:0					LOC_Os01g20170.1|13101.m02191|1000bp_UpstreamSeq|11470443..11471445
siR118523	AGCAGTGATCTGGTGTAGTTGTCG	24	2.45633	1.50406	0.439418	0	0	11.5218	12.0278	2.72593	2.88093	0.361598					13108.m02607_intr6-sense
siR118529	AGCAGTGCAATTAGGAATCGGAAC	24	0	0	0	0	0	0	33.5243	0	11.8626	0
siR118604	AGCAGTTGGATGGTGTCGTGCTGA	24	0	0	0	0	0	0	12.5396	8.49475	0	0
siR118608	AGCAGTTGTAAGCTTCTTCGAACA	24	16.6329	10.754	0	0	0	79.7071	79.3323	41.3327	26.4367	0					13108.m02607_intr3-sense
siR118662	AGCATAAGCGCGGAGGATGCACAC	24	0	0	0	0	0	11.7798	5.88594	0	0	0					13102.m03554_intr1-sense	LOC_Os02g32780.1|13102.m03553|1000bp_UpstreamSeq|19464461..19463459
siR118714	AGCATACTCTGAAGATTCATTCTT	24	0	2.85771	0	0	0	17.8846	14.0751	11.2841	4.29315	0						LOC_Os11g28370.1|13111.m02728|1000bp_UpstreamSeq|15869584..15870586
siR118723	AGCATAGACGTCCTAGAGCAGATA	24	4.84248	2.25609	0.527302	0	0	23.7316	19.6198	15.7216	4.63208	2.31423						LOC_Os11g28370.1|13111.m02728|1000bp_UpstreamSeq|15869584..15870586
siR118905	AGCATCAGGCGATGGCACTCCGGT	24	0	0	0	0	0	12.4677	0	0	0	0
siR119231	AGCATGGAGCAGGGGTAGAGTGAG	24	0	0	0	0	0	21.238	0	0	0	0.216959						LOC_Os01g20170.1|13101.m02191|1000bp_UpstreamSeq|11470443..11471445
siR119333	AGCATTAGCGGCACCTGTAACTAA	24	0	0	0	0	0	0	6.22716	23.1387	9.65958	0			13108.m00931_exon1-sense
siR119693	AGCCAACTGCAAGGTGGTCGACGG	24	9.05333	6.09144	0	0	0	34.1356	38.4719	19.0815	11.2978	5.42397					13110.m02650_intr1-sense
siR119905	AGCCACCAGTAGTAATCGTCGTCT	24	4.70212	4.73779	1.23037	1.80294	1.12587	0.429919	6.73898	8.051	11.3542	3.03742
siR121044	AGCCCTAAGCACTGAACCGTCCAT	24	0	0	0	0	0	16.9388	11.0895	9.0653	5.70537	0					13112.m04157_intr1-sense
siR121226	AGCCGAAGCAATGAAGACGATGAG	24	0	0	0.351534	0	0	10.3181	0	0	0	0
siR121564	AGCCGCCATCAGACCATCGGACAA	24	7.43917	6.69306	2.54862	2.74734	0	0	0	9.44566	19.884	0
siR121700	AGCCGGCCAAGGAAAGAAGTAGAA	24	0	18.0487	7.11857	0	0	0	0	16.2288	0	0			13102.m03185_exon2-sense
siR121978	AGCCTAAGACTGCATAGCCACTTG	24	8.21116	4.21137	1.40614	0	0	45.5715	29.9415	30.3022	10.8458	0						LOC_Os12g09060.1|13112.m00961|1000bp_UpstreamSeq|4735236..4734234
siR122355	AGCCTCTGCCTGACTGCAAACATC	24	2.10543	1.65446	0	0	0	14.0154	8.87157	7.67064	4.23666	2.53119		13102.m02562_exon2-antisense		13102.m02562_intr1-antisense
siR122475	AGCCTGGAGGACATGTTGATTGTA	24	0	0	0	0	0	10.834	0	0	0	0
siR122812	AGCGAAAAGTAATAGGTCATCGTC	24	1.33344	0	0	0	0	5.93289	15.3546	2.0286	0	0
siR122818	AGCGAAACAGAGGCTCATGTCATG	24	5.1232	2.40649	0	0	0	21.8399	18.9374	10.9671	4.34963	0
siR122940	AGCGAATCTCCCGAGTCGTCGTGT	24	1.8247	0.601624	0.263651	0	0	9.37224	16.293	3.16968	1.41222	0.433918	LTR:0
siR123017	AGCGACATGATGTGCTATGGGTAT	24	0	0	0	0	0	0	14.8428	0	0	0	LTR:1
siR123022	AGCGACATTAACAGAACAAGCAAG	24	20.3524	0	0	0	0	78.4173	70.8872	67.1973	20.5619	0
siR123104	AGCGACGACGGCAGGAAGGGGACG	24	0	0	0	0	0	63.8	0	0	0	0
siR123222	AGCGAGAGAACTGAAGGCTGCTAG	24	0	2.03048	0	0	0	0	13.3927	0	0	0					13109.m01055_intr3-sense
siR123324	AGCGAGTAGCCGGCGGTGTAGTAG	24	0	1.88007	0	0	0	62.1663	43.2489	0	5.98781	0
siR123432	AGCGATCTGAAGACATAAGCAAAA	24	20.7033	0	6.06397	0	7.78729	0	4.00927	22.7583	34.0627	23.6485
siR123514	AGCGATTGTGAGAGAGTAGAAGAG	24	0	5.1138	0.96672	0	0	36.4572	35.3157	0	0	0
siR123552	AGCGCACGCGTCTGGACTCGGACA	24	8.21116	4.58738	0	1.45953	0	0	0	3.23308	11.6932	3.3267			13112.m03279_exon3-sense
siR123702	AGCGCCTCATCAAGATCTGAAGAT	24	1.33344	2.33129	0	0	0	12.2957	7.67732	0	6.0443	0	LTR/Copia:0	13111.m02728_exon1-antisense
siR123758	AGCGCGGATTTGCAGAAGTGCGAA	24	0	0	0	0	0	0	0	12.9323	0	0
siR123850	AGCGCTGTCTCTGATATCGTCGGG	24	15.9311	7.14428	4.3063	0.171709	0.0938228	11.0059	11.2601	4.69113	12.7665	1.22943	LTR/Gypsy:1
siR123937	AGCGGACGGCTGTCTTCTTCTACC	24	19.1594	0	0	0.600981	0	0	1.70607	4.24738	17.3985	1.01247			13104.m04543_exon5-sense
siR123949	AGCGGACTTCTGCAGAAAGGCACC	24	59.7239	41.8128	27.2439	21.2061	20.5472	0.515903	20.9847	118.8	76.1469	56.7709
siR123952	AGCGGAGACGATCAATGAAAGAGC	24	8.28134	6.01624	1.75767	0	0	47.6351	40.6898	0	12.0886	2.16959
siR124084	AGCGGCGTGGTATAGAGATGGGCT	24	0	0	0	0	0	26.827	0	0	0	0
siR124110	AGCGGGACTTAGCTAATTTCACCA	24	0	0	0	0	0	14.1873	15.9518	0	0	0
siR124191	AGCGGTAGAAACTAAGGCTGTGTT	24	0	0	0	0	0	0	34.9744	0	0	0
siR124202	AGCGGTATGGAGTATGTGACGTGT	24	4.07049	2.10568	0.351534	0	0	19.2604	17.9137	6.21258	4.0107	0.723196						LOC_Os06g48550.1|13106.m05162|1000bp_UpstreamSeq|29375998..29377000
siR124283	AGCGGTGACGATGCTGTGTGCTCC	24	5.89519	3.23373	0	0	0	14.2733	16.3783	6.14919	7.17407	0
siR124352	AGCGTACACGTGGAAACAGATGGC	24	0	4.43697	0	0	0	14.3593	0	10.0796	0	0
siR124799	AGCTAATGACGGAACCTCTTATGT	24	0	0	0	0	0	0	0	13.2493	0	0					13101.m07604_intr4-sense
siR124987	AGCTACTAGTGTTGTCGTACGTAC	24	3.50904	1.12804	0.439418	0.0858545	0	11.9518	10.407	6.46616	2.48551	1.01247
siR125152	AGCTAGGATTTGAGGTGGGGGTGT	24	0	0	0	0	0	10.0601	0	0	0	0
siR125201	AGCTAGTTAGGACGAATGGTGGCG	24	0	10.5284	0	0	0	35.6833	37.1923	10.5867	20.6749	0
siR125461	AGCTCAAGCGACTTCAAGACCAAT	24	0	0	0	0	0	19.2604	16.6342	12.6153	6.27025	0
siR125493	AGCTCACTACAGTTAAATCTCGGA	24	0	5.94103	0	0	0	7.13666	0	11.6644	0	0						LOC_Os11g40780.1|13111.m04045|1000bp_UpstreamSeq|23925288..23924286
siR125630	AGCTCCAGACTAGCATATCGGACA	24	22.107	0	0	0	0	0	0	0	20.5054	0
siR125726	AGCTCCTCATCCACGTCGGATCCA	24	0	0	0	0	0	0	15.5252	0	0	2.02495			13102.m03554_exon2-sense			LOC_Os02g32780.1|13102.m03553|1000bp_UpstreamSeq|19464461..19463459
siR126146	AGCTGAACTACTGAACTGCTGAAG	24	0	0	0	0	0	37.575	31.3064	28.9075	4.46261	2.74815						LOC_Os06g23010.1|13106.m02474|1000bp_UpstreamSeq|13426643..13427645
siR126217	AGCTGACGATGGAATAATGGAAGG	24	2.73705	1.35365	0.615185	0.343418	0	11.4359	10.6629	6.9733	2.93742	0
siR126243	AGCTGAGAACTGAGATAATGCAGA	24	18.4576	0	0	0	0	0	0	0	19.1497	0
siR126246	AGCTGAGACAACGGTGCAATGCAG	24	0	0	0	0	0	16.4229	14.1604	11.8546	0	0
siR126256	AGCTGAGCACGATGACGAATGACC	24	1.96506	0	0	0	0	28.9766	21.2406	0	0.282444	0
siR126274	AGCTGAGTGTAGATAGACCAAAGC	24	16.282	6.91867	1.49402	0	0	21.9259	31.8182	27.1959	14.7436	8.60604
siR126312	AGCTGATGTAGCAGAAGTGAATGC	24	16.5627	0	0	0	0	0	2.13259	18.3842	19.0932	17.1398
siR126550	AGCTGCGACATGGAAAGATGATGG	24	0	0	0	0	0	69.8189	68.84	48.623	0	0
siR126557	AGCTGCGCAGGTAGGACTGGCTAA	24	0	0	0	0	0	0	0	33.3451	0	0
siR126699	AGCTGGACGAAGGTGTTGCAAATC	24	0	0	0	0	0	0	0	18.3208	15.3649	0
siR126769	AGCTGGCTGGGTTTGCAAGAAGGT	24	0	0	0	0	0	0	0	0	15.3085	0
siR126844	AGCTGTACCTGATGATAAGACAAT	24	0	0	0	0	0	12.2957	12.0278	0	0	0
siR126990	AGCTGTGAGACAGATGAGCATAGG	24	0	0	0	0	0	0	12.1984	0	0	0
siR127031	AGCTGTTATGCTAGTCGTCTGAAT	24	37.8977	27.2235	7.47011	0	0	20.5501	15.8665	4.69113	38.5818	1.73567
siR127055	AGCTGTTGGATCCGGTATGTATGT	24	18.8786	11.3556	0	5.06542	4.03438	0	1.02364	5.64204	23.7253	11.2095
siR127097	AGCTTACAACTGCTAACCGTCGAC	24	22.879	15.7174	0	0	0	119.088	140.58	55.5329	32.481	13.2345				13108.m02607_intr3-antisense
siR127192	AGCTTATGGATGTAGCGCAGCATA	24	0	0	0	0	0	0	13.9898	22.2512	17.5115	0
siR127196	AGCTTATGTAGGTAGTAGGGTGGA	24	48.3546	0	0	0	0	105.76	0	46.7211	43.4963	14.6086
siR127239	AGCTTCACGTAGATTTAGTTGGGC	24	0	0	0	0	0	73.7742	73.9582	0	0	0
siR127310	AGCTTCCGAGAACAGGTGTCTGCA	24	4.63194	2.03048	0.351534	0	0	21.9259	16.8901	8.55815	5.42292	2.24191		13102.m02562_exon4-antisense
siR127550	AGCTTGACGATGCTGAAGGATGAT	24	22.6684	17.4471	0	0	0	9.37224	14.9281	0	0	0		13111.m04045_exon1-antisense
siR127555	AGCTTGACGGTTTTACTATAGACG	24	44.4947	19.3272	0	0	0	112.123	126.932	86.9127	30.6734	7.44892
siR127728	AGCTTGTGGGTGAATATTGTCGGT	24	0	0	0	0	0	66.7235	67.0486	39.8746	0	11.0649
siR127815	AGCTTTCCTTCTCACCGTCGATAT	24	1.26326	0.977638	0	0	0	10.1461	10.407	3.29647	2.0336	0.723196
siR127840	AGCTTTGAGTTGTATACACCTGAT	24	0	0	0	0	0	16.6809	0	0	0	1.88031
siR127965	AGGAAAAAGGACAACGAGAATGGC	24	0	10.002	0	0	0	26.9989	31.3064	9.88941	11.6367	1.73567		13102.m03554_exon3-antisense				LOC_Os02g32780.1|13102.m03553|1000bp_UpstreamSeq|19464461..194634
siR127967	AGGAAAAAGGCTCGCAGTCGCAGG	24	0	0	0	0	0	48.8388	0	0	30.7299	0
siR127978	AGGAAAACATAATTGGAACGGTAG	24	0	0	0	0	0	0	0	18.3208	0	0		13103.m07097_exon8-antisense
siR128025	AGGAAAATTTAGACAGCACCCATT	24	30.7392	0	0	3.69174	0	0	0	0	29.939	19.3093						LOC_Os10g04930.1|13110.m00410|1000bp_UpstreamSeq|2409219..2408217
siR128037	AGGAAACCATGCATGATCTGTACT	24	6.17591	0	0	0	0	0	0	0	16.6077	0
siR128074	AGGAAAGAAGTTAGCAACAGTCGA	24	0	0	0	0	0	29.3205	0	0	0	0
siR128089	AGGAAAGATGTAACGAGATAGAGC	24	0	16.4694	0	4.89371	0	0	0	4.43756	0	11.1372
siR128092	AGGAAAGCAATGCCGAGCGATGGG	24	3.36868	0	0	0	0	10.49	0	6.78312	0	0
siR128096	AGGAAAGCTACGAATCGGACGTCA	24	0	22.5609	0	0	0	173.945	194.236	101.874	50.501	20.3218
siR128107	AGGAAAGGGGTACAAAGGCTGGCA	24	0	0	0	0	0	19.2604	0	0	0	0
siR128171	AGGAAATCTCTGTGGTGGCGCATC	24	0	0	0	0	0	0	0	13.7564	0	0						LOC_Os01g44160.1|13101.m04572|1000bp_UpstreamSeq|25312748..25311746
siR128225	AGGAACAAGGAGGACAGGAAAAAT	24	0	0	0	0	0	27.0849	0	0	0	0	LTR/Gypsy:1
siR128256	AGGAACAGGAACATGAGAGGAGGC	24	0	0	0	0	0	288.648	0	0	0	0
siR128336	AGGAACGTTGGTAGCAGCAGTAGC	24	3.50904	0	0	0	0	15.0472	12.0278	6.59294	0	0	LTR/Gypsy:0
siR128363	AGGAACTGCATGCATTGGAACTAA	24	19.7208	16.5446	0	0	0	0	55.4473	0	0	0						LOC_Os01g37580.1|13101.m03823|1000bp_UpstreamSeq|21008518..210095
siR128387	AGGAAGAACATGACAGCGATGATG	24	0	0	0	0	0	68.9591	0	0	0	0
siR128402	AGGAAGAATGACAACAAAGGATAT	24	0	0	0	0	0	0	28.9179	0	6.49621	0					13102.m02562_intr6-sense
siR128406	AGGAAGAATGACGACAAAGGATAT	24	3.2985	1.80487	0.263651	0	0	33.1898	24.9939	14.7073	4.12368	0					13102.m02562_intr2-sense
siR128446	AGGAAGAGTGACGATGCCAATTTG	24	15.0889	8.64834	0	0	0	0	0	0	0	0		13109.m03271_exon1-antisense
siR128448	AGGAAGAGTGGCATCTCAGTAGTG	24	0	0	0	0	0	14.4453	0	0	0	0
siR128461	AGGAAGATGGTCATAGGCAAGTAG	24	0	0	0	0	0	0	0	11.3475	0	0
siR128475	AGGAAGCAGACTCTCCGCGGCGTG	24	0	0	0	0	0	27.1709	0	0	3.27635	0
siR128483	AGGAAGCATGTGTGTAATCAGTAA	24	0	0	0	0	0	0	35.1451	0	0	0
siR128526	AGGAAGGACAGTGTACGCGGTGTG	24	0	0	0	0	0	16.4229	0	9.31887	0	0
siR128580	AGGAAGTAGCATGAGTAGAGTCCA	24	0	0	0	0	0	38.0049	0	0	0	0			13112.m00961_exon8-sense
siR128612	AGGAAGTCTAGAGCAGGGCCAGGG	24	3.50904	1.65446	0.263651	0	0	25.1933	16.8048	10.3332	0	0.578557
siR128616	AGGAAGTGAGTATAACAGTAGAAG	24	5.40393	0	0	0	0	0	0	19.3985	0	0	LTR/Copia:0	13111.m02728_exon2-antisense
siR128634	AGGAAGTTCTTGCTGATGGACAAT	24	0	0	0	0	0	0	11.0042	0	0	0
siR128648	AGGAATAACTCGCAGCATCGGACC	24	0	0	0	0	0	0	0	71.1277	0	0
siR128672	AGGAATACATACTCTGCCGGTACC	24	2.38615	0.601624	0	0	0	12.9836	13.3074	7.35367	1.07329	0.433918
siR128730	AGGAATCAGGTCTAGCAGAAGAAT	24	0	0	0	0	0	0	0	0	25.9283	0				13109.m03271_intr1-antisense
siR128814	AGGAATGGAGACCATCAACTTGAG	24	0	0	0	0	0	0	0	0	49.6536	0			13102.m03185_exon2-sense
siR128827	AGGAATGTAGATTGCAGTTGTCAT	24	0	7.6707	0	0	0	52.7081	0	33.5987	9.15118	0
siR128841	AGGAATGTTGTGCTTGGAGGAGAA	24	0	8.19712	0	0	0	0	39.6661	23.2655	13.2749	0	DNA/Stowaway:0
siR128882	AGGAATTGTTGTCAACAGAGCGGT	24	0	0	0	0	0	0	228.016	0	0	0
siR128891	AGGAATTTTCAGGACAAGTGCGTG	24	7.71989	0	0	0	0	15.993	0	0	0	0			13105.m01987_exon3-sense
siR128946	AGGACAAGATAGCAGAAATGGTGG	24	0	0	0	0	0	371.622	260.602	0	92.1897	0			13106.m02114_exon1-sense
siR129088	AGGACAGGAACTGCATGCATTGGA	24	0	9.32517	0	0	0	108.512	71.5697	56.8641	0	0						LOC_Os01g37580.1|13101.m03823|1000bp_UpstreamSeq|21008518..21009520
siR129103	AGGACAGTTTGTAGGTAGGGTTGC	24	0	0	0	0	0	10.2321	0	0	14.0657	0					13112.m04157_intr1-sense
siR129145	AGGACATGACTATGGTATCTTGAC	24	11.5798	0	0	0	0	0	0	3.9938	0	0
siR129165	AGGACATGGTCTGAGTATAAGAGG	24	0	0	0	0	0	51.5043	54.253	0	0	0
siR129168	AGGACATGTATGATAGCAGGGCAT	24	49.4775	0	0	0	0	0	0	0	0	0
siR129610	AGGACGTGCCTGCAAGAGAGAAGA	24	0	0	0	0	0	0	30.2828	0	0	0
siR129681	AGGACTATGGCTTTCCGGTCGGGG	24	8.21116	0	13.3583	0	0	0	0	0	0	0
siR129686	AGGACTCAATCTTGGTTGCGAGGG	24	0	0	0	0	0	28.9766	0	0	0	1.15711						LOC_Os01g16630.1|13101.m01861|1000bp_UpstreamSeq|9436432..9437434
siR129718	AGGACTGATAACCAGAAGTAAGAC	24	16.9838	9.70118	0	0	0	14.1873	21.4112	14.8975	18.3588	0
siR129757	AGGACTGTGAAGAAGATAGGATTA	24	0	0	0	0	0	11.9518	0	0	0	0
siR129788	AGGACTTGCATGCACGAGATTTGA	24	0	6.09144	0	0	0	8.85634	9.04217	2.78932	13.6703	1.15711
siR129822	AGGAGAAATTACACATCGAACAAC	24	0	0	0	0	0	12.1237	0	0	0	0					13106.m02474_intr2-sense
siR129952	AGGAGACTTAACGTAGGCACACCA	24	0	0	0	0	0	0	0	0	26.6627	11.1372
siR129959	AGGAGAGAAAGATATGACTGCATA	24	0	0	0	0	0	0	48.1965	0	0	0
siR129970	AGGAGAGAGAATGGTATGGGCCCA	24	0	0	0	0	0	16.8528	8.61566	0	0	0
siR129973	AGGAGAGAGCTCGAGCACACCGGA	24	0	0	0	0	0	58.641	0	0	0	0
siR129997	AGGAGAGGAAGAACTGCCGGTGTA	24	0	0	0	0	0	0	0	115.25	0	0
siR130018	AGGAGAGTATAAAGGGACTATATG	24	4.91266	2.5569	0	0	0	13.4995	12.9661	6.52955	5.64888	0.578557
siR130048	AGGAGATATAAGCAGTTGGATGGT	24	0	0	0	0	0	16.4229	0	0	0	0
siR130099	AGGAGATGCCGTGGACCTGATGGA	24	4.98284	2.85771	0	0.515127	0	1.28976	6.56837	9.38226	12.3146	0	LINE/L1:1		13108.m01378_exon3-sense
siR130133	AGGAGATTGAGCTTATGCAATTAA	24	0	0	0	0	0	0	0	43.6149	0	0
siR130143	AGGAGATTTGACGATGGATTCACA	24	0	5.1138	0	0	0	0	0	11.0305	0	0
siR130151	AGGAGCAACGGAGCACACTGATGG	24	0	0	0	0	0	72.7424	83.1709	0	57.2231	0
siR130161	AGGAGCACACAGCATCGTCACCGC	24	0	0	0	0	0	16.7669	14.9281	0	0	0
siR130212	AGGAGCATGGATACCGAGGGCGGG	24	0	0	0	0	0	46.9472	0	15.6582	0	0
siR130292	AGGAGCGCGTAGTACATCCAACAC	24	0	0	0	0	0	126.224	127.785	0	20.2795	0
siR130356	AGGAGCTGGCTTGCTGGAATTCAT	24	0	0	0	0	0	14.2733	9.12748	0	0	0	LINE/L1:1
siR130390	AGGAGGAACAGGAACATGAGAGGA	24	0	0	0	0	0	0	15.7812	0	0	0
siR130535	AGGAGGTAGGCAAAGTTGGTAAGG	24	0	0	0	0	0	38.3488	25.847	16.6091	6.77865	1.37407
siR130537	AGGAGGTAGGTAGGGTTTCTCAAA	24	3.01778	0	0	0	0	21.8399	13.222	5.89561	0	0	DNA/hAT:0				13106.m05162_intr1-sense
siR130574	AGGAGGTTAAGGCTGATGTTGTAC	24	0	0	0	0	0	21.6679	18.4256	10.8403	0	0
siR130579	AGGAGGTTGTAGCGGGCAACGCAT	24	0	0	0	0	0	0	13.6486	0	0	0
siR130610	AGGAGTAGACTATCGGCCCCACTC	24	0	0	0	0	0	52.9661	0	0	0	0					13106.m05162_intr1-sense
siR130744	AGGAGTGTAGTGATGGATCAGATA	24	2.87741	0	0	0	0	11.2639	0	0	0	0.433918
siR130773	AGGAGTTCTGCTAGGAAGGCTGCT	24	12.0009	0	0	0	0	0	0	0	0	0			13107.m03732_exon2-sense
siR130853	AGGATAACTAGTGCAGGTGAAGAC	24	21.1946	10.2276	0	0	0	160.36	0	0	0	0	DNA/MuDR:1				13106.m02114_intr1-sense
siR130876	AGGATACAAGGGCGATGAAGAGGG	24	6.597	0	0	0	0	0	40.3486	0	0	0			13103.m04974_exon1-sense
siR130913	AGGATACGTTGTATGCGGAGAACA	24	0	0	0	0	0	55.6316	55.362	33.4719	23.7818	0
siR130927	AGGATAGAAGAGGCGCTACTCGTA	24	0	0	0	0	0	17.8846	11.7719	9.38226	0	0
siR131041	AGGATATGTCTGAAAGCACGAGGA	24	0	0	0	0	0	0	0	0	75.243	0		13107.m00904_exon5-antisense		13107.m00904_intr4-antisense
siR131126	AGGATCATGGCCAACAGAGCAAAA	24	7.64971	6.01624	0	0.171709	0	25.3652	23.7144	11.7278	12.8229	0			13112.m00961_exon1-sense
siR131186	AGGATCCTCTGACGTAGTGGTTTC	24	1.75452	1.50406	0.263651	0	0	12.8976	11.0042	8.74833	2.65497	0
siR131197	AGGATCCTGTTCCGCATGCTACAC	24	8.77261	0	0	0	0	56.8353	46.7463	22.061	13.8397	2.38655
siR131248	AGGATCTAAAGCTAATGAAGATGG	24	0	0	0	0	0	0	0	0	0	13.8854			13112.m00659_exon1-sense
siR131343	AGGATGAAAAGGAGAACCAGGTGG	24	0	0	0	0	0	110.231	95.7959	0	0	0						LOC_Os06g19790.1|13106.m02114|1000bp_UpstreamSeq|11301571..11302573
siR131349	AGGATGAACAATGCAACAAGCCAG	24	0	0	8.34894	0	0	0	22.1789	0	53.7208	0				13107.m00953_intr2-antisense
siR131370	AGGATGAAGTAATGGGCACAAAGT	24	0	0	0	0	0	0	22.6054	0	0	0
siR131372	AGGATGAAGTCTGAGAAAAGATGT	24	0	0	0	0	0	38.6068	0	0	7.11758	0
siR131380	AGGATGACAACTTAAGATGAGATT	24	2.45633	0.827232	0	0	0	8.94232	10.4923	0	1.41222	0						LOC_Os02g12880.1|13102.m01422|1000bp_UpstreamSeq|6797730..6798732
siR131384	AGGATGACAGAACGTGGGGTAGGA	24	0	0	0	0	0	0	17.999	0	3.67177	0
siR131400	AGGATGACGGAGTTAATTGGAGGG	24	0	2.33129	0	0	0	25.0213	23.2026	9.76263	4.68857	0			13105.m00371_exon1-sense
siR131408	AGGATGAGACACGGCGATTTTGAC	24	0	0	5.8882	0	0	0	9.12748	21.9342	27.7925	0			13111.m00819_exon7-sense
siR131509	AGGATGCGATGGTATGTAGATAAT	24	0	5.41461	0	0	0	0	0	11.3475	0	0					13105.m01987_intr2-sense
siR131606	AGGATGTAAGACCGTGTTGGCGAA	24	2.59669	0.977638	0	0	0	10.49	0	0	0	0
siR131636	AGGATGTAGTAGGCCGGCGTTCTG	24	0	0	0	0	0	10.92	14.8428	4.75453	0	0						LOC_Os07g27110.1|13107.m02692|1000bp_UpstreamSeq|15716343..157173
siR131661	AGGATGTGATGTCTTTTCGTCGTT	24	0	0	0	0	0	6.44879	10.9189	1.14109	0	0						LOC_Os09g15660.1|13109.m01485|1000bp_UpstreamSeq|9556217..9555215
siR131665	AGGATGTGCGGTGCGTCTCTACTG	24	0	0	0	0	0	0	0	10.9671	7.40003	0
siR131671	AGGATGTGGAGAAGGCCCTTTGGA	24	0	0	0	0	0	0	0	0	28.4703	0				13112.m03279_intr2-antisense
siR131783	AGGATTCCAACGAACCAGTGGCTA	24	46.8808	27.5243	0	10.646	0	0	0	0	0	0			13111.m00819_exon1-sense
siR131837	AGGATTGATGCAACAAGTAGATAG	24	0	0	0	0	0	0	0	32.521	0	0				13104.m06218_intr1-antisense
siR131861	AGGATTGCTGAGTGGTGCATCATG	24	0	0	0	0	0	0	0	10.9037	0	0
siR131894	AGGATTGGTCTTGAAGTCGCTTGA	24	40.2136	22.2601	7.11857	0	0	107.738	114.136	47.2917	62.985	15.2594
siR131916	AGGATTGTGTCAGTGGTAGCTAGG	24	0	71.2924	0	0	0	0	46.8316	112.397	0	85.2648
siR131964	AGGATTTCTGCATATGAGTACACA	24	0	0	0	0	0	0	0	11.918	0	0						LOC_Os09g10570.1|13109.m00930|1000bp_UpstreamSeq|5770170..5769168
siR131987	AGGATTTGCTCTTGTTTGATCAGT	24	0	0	0	0	0	69.9909	0	0	0	0
siR132060	AGGCAAAGGGCTTCTCAATCATGG	24	3.08796	0	0	0	0	10.3181	0	0	0	0	LTR/Gypsy:0
siR132064	AGGCAAAGTTGGTAAGGTTCCCTG	24	0	0	0	0	0	43.8518	26.9559	0	5.47941	0
siR132082	AGGCAACAATGTCGACGAGGAGGA	24	0	0	0.96672	0	0	41.7022	24.9086	0	0	3.6883			13106.m05162_exon3-sense
siR132098	AGGCAACCGAGACATGGGCATTCA	24	0	0	0	0	0	0	11.0895	7.67064	0	0
siR132130	AGGCAAGAACTCATCAGTCGTCGC	24	0	0	0	0	0	0	0	33.662	0	0
siR132155	AGGCAAGGAATGCAACTGTGATGC	24	26.9494	12.5589	3.42746	0	0.187646	66.7235	60.2243	27.6396	30.7299	8.67836			13105.m04596_exon2-sense
siR132201	AGGCAATGACGAGGAAGCAATGAC	24	0	0	0	0	0	6.44879	6.73898	0	10.5634	0					13110.m02650_intr1-sense
siR132354	AGGCACCTGTCAAATACTTGCAAC	24	6.80754	6.91867	1.93344	0	0	24.2475	23.032	18.7011	0	4.26686
siR132391	AGGCACGCGGCAGAACAAGTAGAG	24	0	0	0	0	0	0	15.5252	12.8055	3.67177	0
siR132410	AGGCACTAATCGACTTTACATCCT	24	7.29881	11.7317	0	0	0	0	0	0	4.40612	5.78557	LTR/Copia:1				13104.m11951_intr1-sense
siR132423	AGGCACTCGTAGGCTGCAATGGAG	24	90.3227	0	0	0	0	290.196	258.043	155.315	122.298	0				13108.m02607_intr2-antisense
siR132439	AGGCACTTAGGAGACGAGAATCTC	24	0	11.5813	0	0	0	0	0	0	0	0				13108.m02607_intr7-antisense
siR132597	AGGCAGTCTTAGCGCAGTCGGGTA	24	10.9482	5.26421	1.31825	0	0	33.0178	31.7329	9.95281	9.49011	0.940155
siR132599	AGGCAGTGACATGGACCATCAGTG	24	0	0	5.62455	0	0	0	0	0	0	10.3417
siR132607	AGGCAGTGGTAGGCATAAGGACGG	24	0	0	0	0	0	0	188.777	0	0	0			13106.m05162_exon1-sense		13106.m05162_intr1-sense
siR132622	AGGCATAAGGACGGGAAGAGATGT	24	12.8431	0	0	0	0	0	51.0968	0	5.87483	0					13106.m05162_intr1-sense
siR132668	AGGCATCAACAGTGACGGGCTCGC	24	9.12351	0	0	0.944399	0	0	0	0	13.1619	5.85789		13104.m00770_exon1-antisense
siR132817	AGGCATTTATGAACTATCTTTTGT	24	0	0	0	0	0	0	12.8808	7.92421	0	0						LOC_Os05g43600.1|13105.m04596|1000bp_UpstreamSeq|25291743..25292745
siR132831	AGGCATTTTTTTTTGAACGCGCAA	24	0	0	0	0	0	0	29.7709	0	0	0				13101.m02100_intr2-antisense
siR132875	AGGCCAATAGTAGAAGTTGATCGA	24	13.5449	0	0	0	0	46.0014	0	0	0	0
siR132944	AGGCCAGCAGCAGAAGTCGATCGA	24	6.45664	0	0	0	0	69.561	0	21.9342	4.34963	0
siR133028	AGGCCCAGATCGCAAGACAAGCAG	24	1.54398	1.05284	0	0	0	10.92	0	0	0	0
siR133481	AGGCGACCTTCAGATCTAACAGCA	24	0	0	0	0	0	0	58.177	0	17.9069	5.27933
siR133528	AGGCGAGAACTGTGCGAGGCCGAA	24	0	0	0.439418	0	0	0	20.4728	0	3.5023	0							LOC_Os12g09550.1|13112.m01013|3-UTR
siR133585	AGGCGATGATGCTGTGGGAGATGA	24	0	0	0	0	0	0	0	5.70543	14.5176	3.47134			13110.m00409_exon2-sense
siR133589	AGGCGATGGCACTCCGGTTAGTAT	24	6.597	6.54266	1.84556	0.257563	0	54.1698	31.5623	29.2879	12.0886	4.0499
siR133690	AGGCGCTAAGTAGGCAGGGCAAGT	24	10.4569	0	0	0	0	46.9472	29.0032	26.1182	10.3374	4.48382						LOC_Os06g23010.1|13106.m02474|1000bp_UpstreamSeq|13426643..13427645
siR134000	AGGCTAGTAGTAAGTAGAAGTGCT	24	0	0	0	0	0	68.3572	60.3949	0	0	0				13101.m02191_intr1-antisense
siR134117	AGGCTCCGAAGACTTGCAGCAGCC	24	1.89488	0	0.263651	0	0	10.748	9.98051	0	0	0
siR134150	AGGCTCGTGAGTAGATGGCGAACG	24	0	0	0	0	0	13.0695	15.0987	0	0	0
siR134220	AGGCTGCAACAATGTCACGATGGT	24	7.79007	0	0	0	0	17.7127	17.3166	0	5.47941	1.66335
siR134254	AGGCTGCCGAAGCATAGACGTCCT	24	2.24579	0	0.439418	0	0	0	10.3217	0	0	1.73567						LOC_Os11g28370.1|13111.m02728|1000bp_UpstreamSeq|15869584..15870586
siR134308	AGGCTGTAACTGTAAAGATGGTTC	24	0	0	0	0	0	0	18.5109	0	0	0
siR134313	AGGCTGTAGGCTGTAGTTTGATGT	24	3.50904	1.12804	0.263651	0	0	0.171968	0	16.4824	4.46261	0.578557					13103.m07097_intr11-sense
siR134315	AGGCTGTAGTTTGATGTGTTTTGT	24	7.29881	5.0386	0	0	0	0	0	15.5948	11.0718	0					13103.m07097_intr11-sense
siR134328	AGGCTGTGGGTGTAAGGTTTTGCT	24	0	0	0	0	0	0	0	13.5029	0	0	LTR/Gypsy:1
siR134583	AGGGAAAAGCAGAAAGTGAATGTG	24	0	0	0	0	0	29.2345	0	0	0	0				13101.m02191_intr2-antisense
siR134596	AGGGAAAGGGAAAAAAATCGCGCG	24	0	0	0	0	0	0	0	16.419	0	0
siR134619	AGGGAACATCAGCTAGTCGGGAAG	24	0	0	0	0	0	42.2181	33.0978	19.0815	0	2.60351		13105.m00371_exon1-antisense
siR134620	AGGGAACATCGATGGCAGCCTGAG	24	0	0	3.86688	0	0	0	0	0	14.6871	0						LOC_Os06g42920.1|13106.m04493|1000bp_UpstreamSeq|25790438..25791440
siR134630	AGGGAACGTCGATGGCAGCCTGAG	24	11.8606	6.99387	4.3063	1.37367	3.47144	0	5.03291	5.83222	17.9634	2.67583		13106.m04493_exon1-antisense
siR134678	AGGGAAGCTGAGCACGATGACGAA	24	0	0	0	0	0	0	63.2099	0	0	0
siR134791	AGGGACAGCAAGACGGAAGAGCAG	24	0	0	0	0	0	25.9671	0	0	0	0				13101.m03823_intr1-antisense
siR134881	AGGGACCTAGCTACACAACTCGCA	24	16.6329	0	0	0	0	0	0	0	0	0
siR135004	AGGGACTCTCAGCAGCAAACGATC	24	0	0	0	0	0	0	0	0	31.0123	8.96763			13107.m00904_exon3-sense
siR135017	AGGGACTGTTAGGGGTGGCAATTT	24	0	0	0.790953	0	0	17.6267	14.7575	4.43756	0	0					13107.m00837_intr3-sense
siR135057	AGGGAGAGTAGCGCCGACCGACGG	24	5.68465	0	0	0	0	27.5148	24.4821	0	6.38323	0			13101.m04572_exon1-sense
siR135096	AGGGAGCTAGGGATGTATGGTCAT	24	0	0	0.175767	0	0	21.238	10.0658	0	0	0						LOC_Os06g19790.1|13106.m02114|1000bp_UpstreamSeq|11301571..11302573
siR135135	AGGGAGTAAGATCAGAAGACACAA	24	0	1.12804	0	0	0	0	0	14.3904	0	2.31423
siR135275	AGGGATCTCTTGGATGGAAGCAGA	24	0	0	0	0	0	0	6.48307	19.2717	11.5237	0			13108.m01378_exon4-sense
siR135277	AGGGATCTGTACTTGTGAGGATGT	24	0	0	1.0546	0	0	0	0	10.6501	0	0	DNA/En-Spm:0
siR135289	AGGGATGAACTCTTAAAGATGGTG	24	85.6206	37.1503	0	0	0	0	351.877	0	0	0
siR135456	AGGGCAACAAACTGGATCGGAGGC	24	0	0	0	0	0	45.7434	46.9169	0	0	0						LOC_Os01g20170.1|13101.m02191|1000bp_UpstreamSeq|11470443..11471445
siR135544	AGGGCAGGATAGAAGAGGCGCTAC	24	0	0	0	0	0	0	24.1409	0	0	0
siR135570	AGGGCATAGAGAAAAGAAGATGAC	24	0	0	0	0	0	34.4795	0	0	0	0				13108.m01648_intr1-antisense
siR135577	AGGGCATATATGGTGTAGTCTTAG	24	7.64971	5.189	0	0	0	13.2415	14.0751	5.83222	9.0382	1.66335				13112.m00961_intr1-antisense
siR135596	AGGGCATGAGTAGCACGTATTTGC	24	10.878	8.34753	0	0	0	7.73855	5.28882	1.58484	15.139	0.795516
siR135737	AGGGCCGGCTCTACAATCTTGAGG	24	4.84248	2.10568	1.14249	0.257563	0.0938228	37.9189	23.2026	20.4762	7.0611	2.45887
siR135818	AGGGCGACAAACTTATGGTAGACG	24	6.87772	0	0	0	0	0	32.7566	0	7.23056	1.95263
siR135920	AGGGCTATGTCATACATCTTGTTC	24	10.5973	6.99387	4.21841	1.71709	1.97028	0	2.3885	7.79742	16.2688	5.06237	DNA/MuDR:1
siR135930	AGGGCTCAGGCTAGAAGGTAAGGA	24	0	0	0	0	0	14.7892	11.8572	13.1225	15.1955	2.38655
siR135971	AGGGCTGCTTGTTGTAGGTCGGCA	24	0	22.6361	0	0	0	101.031	95.1987	49.3837	0	0
siR136030	AGGGCTTTGGTTTTCGATCGTTTG	24	4.49157	0	0	0	0	6.79273	10.8335	2.28217	3.55879	0.723196
siR136076	AGGGGACAAGCAAAGATACATCAA	24	0	0	0	0	0	0	17.2313	0	8.24736	0
siR136109	AGGGGACGCGTACCTTAATCTGAA	24	4.84248	2.25609	0	0	0	11.8658	12.369	7.92421	0	0	LTR/Gypsy:0
siR136112	AGGGGACGTACATCGAGTGATAGA	24	0	2.40649	0	0	0	20.8941	15.6105	0	0	0
siR136193	AGGGGATGTGCAGATAGTATGTGC	24	21.9666	9.85159	0	0	0	100.601	68.6693	69.7964	23.2734	9.98011					13108.m02607_intr1-sense
siR136229	AGGGGCAGCGTGAACATCCTTAGC	24	0	0	0	0	0	17.7987	11.3454	6.59294	0	0
siR136285	AGGGGCGCTAATGATGATGGGCAT	24	0	0	0	0	0	140.756	0	0	0	0
siR136288	AGGGGCGGAGACAGAAAATAGCAT	24	0	0	0	0	0	66.6375	0	0	0	0
siR136331	AGGGGCTGAGCATCAGGATACGGA	24	19.5103	0	0	0	0	93.7224	0	49.8274	0	0					13101.m02100_intr2-sense
siR136449	AGGGGTAGAAGCGATCTTCAGTAG	24	2.10543	1.88007	0	0	0	13.1555	9.98051	7.10009	2.20306	0
siR136534	AGGGGTGGATGTAGAAAGTAGCAA	24	0	0	0	0	0	0	34.292	0	0	2.02495
siR136550	AGGGGTGTATGGAGTAAAATCGGT	24	6.31628	4.28657	0	0	0	22.9577	13.8192	9.95281	7.28705	2.24191
siR136602	AGGGTAACTGTCAATGCGCGCATA	24	11.2289	0	1.31825	0	0	80.5669	61.0773	26.1816	0	0
siR136613	AGGGTAATATGATGAGGACACAAC	24	0	0	0	0	0	0	0	26.1182	0	0	LTR:0
siR136648	AGGGTACCTGTCGAACTGCGGTTG	24	5.68465	11.5061	0	18.2012	0	0	0	0	0	14.1746	DNA/MuDR:1					LOC_Os09g02805.1|13109.m07523|1000bp_UpstreamSeq|1290790..1289788
siR136697	AGGGTAGATGGGTCCACTTCGACT	24	0.982532	0	0	0	0	11.4359	5.80064	2.0286	0	0
siR136707	AGGGTAGGCATTGTGTAGCAATCA	24	0	4.43697	0	0	0	0	0	13.2493	0	0
siR136793	AGGGTCATCGATCATCATTGGACA	24	7.50935	0	0	1.80294	1.97028	0	3.58275	3.80362	18.3588	4.12222						LOC_Os08g03470.1|13108.m00309|1000bp_UpstreamSeq|1627801..1628803
siR136809	AGGGTCCAGCGGATGTAGGGGGGA	24	0	0	0	0	0	35.5973	0	0	0	0
siR136941	AGGGTGCATAAATCATAGTAGAAG	24	0	0	0	0	0	14.7032	0	0	0	0				13106.m02474_intr2-antisense
siR137154	AGGGTTGTTAGGTCTAAGATGGGG	24	8.00062	0	0	0	0	28.1167	0	0	0	0
siR137155	AGGGTTGTTAGGTTTAAGATGGGG	24	0	0	0	0	0	20.2062	0	0	0	0					13105.m00973_intr1-sense
siR137161	AGGGTTGTTTGTCTATAAGCGGGT	24	6.52682	3.08332	0	0	0	32.5879	20.3875	14.5172	8.24736	0
siR137266	AGGTAAGAGATGCAAAACTGATCC	24	0	0	0	0	0	10.2321	9.6393	6.27597	5.47941	0
siR137275	AGGTAAGCGAGCAACGACATGTAC	24	12.1413	8.94915	3.42746	0	0	0	0	15.1511	11.8626	0			13105.m03221_exon2-sense		13105.m03221_intr2-sense
siR137408	AGGTACGAACAGATCGCGAGCAGT	24	37.9678	14.6646	0	5.92396	0	0	0	0	32.82	0			13101.m07147_exon1-sense
siR137453	AGGTACTGTGTAACAATCAATGGC	24	74.111	0	0	0	0	0	177.687	0	96.5958	0
siR137465	AGGTAGAAATAATGGTCAGTATAC	24	0	0	0	0	0	0	12.5396	9.88941	0	0
siR137640	AGGTAGTAGACATTAAGATTAGGC	24	5.05302	0	0	0	0	13.3275	0	11.918	0	0
siR137870	AGGTCAAAATAAGAAAGAGACGAA	24	0	0	0	0	0	0	21.1553	11.7278	0	0
siR137905	AGGTCACAGACTGATTGCCGCATA	24	4.98284	2.5569	0.703069	0	0	12.8976	13.478	2.91611	5.42292	1.51871
siR137944	AGGTCACTTTGACTCAAATCGTTT	24	1.40362	1.65446	0.263651	0	0	7.30863	15.0134	1.14109	2.09008	1.01247						LOC_Os12g40000.1|13112.m04157|1000bp_UpstreamSeq|24697598..24696596
siR138217	AGGTCCTGTTTCGTGTCGGCAATC	24	13.4045	8.04672	0	0	0	20.9801	21.07	6.65634	20.5619	1.51871					13101.m02100_intr2-sense
siR138305	AGGTCGGTGTTAGCAATTGATGGG	24	19.3699	0	0	0	0	0	44.1872	0	0	0	DNA/MuDR:1		13106.m02114_exon2-sense
siR138309	AGGTCGGTTGCGCAGTTTGGAGGC	24	22.8088	0	0	0	0	37.231	22.8613	15.0243	25.4764	0		13112.m04157_exon1-antisense
siR138351	AGGTCTAGCAGAAGAATGTGTCAA	24	15.0187	8.64834	0	0	0	0	0	0	11.5802	0				13109.m03271_intr1-antisense
siR138356	AGGTCTAGTGGAAGAAGCGGGTCG	24	0	0	0	0	0	0	3.32684	3.9938	17.2856	0
siR138471	AGGTCTTGATCTTCTGATAGGTAT	24	12.7729	9.32517	0	0	0	22.8717	20.7288	11.9814	16.2123	0	LTR:1
siR138524	AGGTGAAGGAGTGTGAAGATTGTA	24	0	0	0	0	0	0	0	11.8546	0	0
siR138544	AGGTGAATGGAAGAAGCTGTGAGA	24	0	0	0	0	0	17.7987	0	0	0	0					13108.m01397_intr4-sense
siR138620	AGGTGAGAGAGCTGTATATCCAAC	24	0	0	0	0	0	18.6585	15.2693	0	1.92062	0
siR138872	AGGTGCTCTGTCTTGATGTAGTGG	24	5.40393	2.03048	0	0	0	14.7032	16.0371	7.54385	5.14048	1.80799		13105.m04596_exon2-antisense
siR138893	AGGTGGAACTAGAAGGTGTGCAGC	24	0	0	0	0	0	133.791	0	0	0	0
siR138894	AGGTGGAAGAACGTCAACAATTTG	24	20.3524	9.62598	0	0.77269	0	97.5057	78.8205	69.9866	18.4153	7.59356
siR138907	AGGTGGAATGAGTGAGTGATGGAG	24	0	0	0	0	0	0	0	11.7278	0	0
siR138934	AGGTGGAGTAGGCCGGTTTGATGC	24	1.05271	0.601624	0	0	0	11.9518	5.88594	3.10629	1.07329	0.144639						LOC_Os08g33600.1|13108.m03502|1000bp_UpstreamSeq|20978983..20979985
siR138950	AGGTGGATGCTGCGAACATATCGG	24	0	0	0	0	0	0	38.8984	0	0	0	LINE/L1:0	13101.m02100_exon2-antisense
siR138996	AGGTGGGAATAGATGATAAGAAAG	24	0	0	0	0	0	12.5536	8.18914	0	0	0
siR139002	AGGTGGGACCCATATCGACTGCAT	24	1.61416	0	0.175767	0	0	11.7798	8.35975	0	1.24275	0.289279
siR139004	AGGTGGGACTGTGACGGTGATCGC	24	0	0	0	0	0	22.9577	0	0	0	0
siR139045	AGGTGGTCTTGACTGGTATTTGGT	24	0	0	0	0	0	0	0	13.2493	0	0
siR139232	AGGTGTTCTGATTTACCGCCGGTG	24	0	0	0	0	0	21.41	0	0	0	0
siR139238	AGGTGTTGCAAATCGTTGGCGTGC	24	6.03555	0	0	0	0	12.2957	11.7719	0	0	0
siR139301	AGGTTACTACTCATGTTCGTCTTC	24	7.43917	4.88819	1.58191	0	0	0	0	10.0162	14.4611	3.61598						LOC_Os11g07840.1|13111.m00819|1000bp_UpstreamSeq|3995875..3994873
siR139321	AGGTTAGCTTCCTCGCATCGTCTT	24	4.21085	0	0.703069	0	0	38.8647	35.6569	6.46616	6.49621	1.37407
siR139328	AGGTTAGTAGAAGGAGGCCGAGAG	24	0	0	0	0	0	0	0	16.5458	0	0
siR139480	AGGTTCTGGATGATTATGATGGTA	24	0	0	0	0	0	97.4197	0	0	0	0
siR139492	AGGTTCTGTTTGGTGAAGATCATG	24	3.2985	0	0.527302	0	0	10.0601	7.93323	4.50095	2.14657	0
siR139602	AGGTTGGAGTGAGCAGTGTATGGT	24	1.75452	0	0.351534	0	0	0	3.32684	11.7912	0	0
siR139609	AGGTTGGATTGTAGCAGCAGCAGG	24	1.96506	0	0	0	0	25.2793	19.2786	0	0.395421	0
siR139696	AGGTTTAGCAATGACGTAGGCACA	24	0	0	0	0	0	0	14.2457	7.41706	5.42292	0		13105.m00279_exon2-antisense
siR139703	AGGTTTAGTAGAATTGCATGGCAA	24	0	0	0	0	0	0	0	0	12.9359	0					13105.m04439_intr1-sense
siR139726	AGGTTTCAGGCGCTAAGTAGGCAG	24	0	0	0	0	0	23.3016	18.0843	0	0	0						LOC_Os06g23010.1|13106.m02474|1000bp_UpstreamSeq|13426643..13427645
siR139731	AGGTTTCATTGTGGTCATCGTCGT	24	22.3877	0	0	0	0	58.2111	57.4093	18.5743	0	0
siR139794	AGGTTTGTAGGCCACGTACGCAAC	24	3.22832	0.827232	0	0	0	18.1426	17.0607	7.73403	3.05039	0.506237
siR139822	AGGTTTTCGTACTATGGTTGTGGG	24	0	0	0	0	0	14.7032	0	0	0	0
siR139866	AGTAAAAGATGTCATGAGCTTGCT	24	9.19369	4.81299	0	0	0	34.6515	39.4955	19.0181	0	0		13108.m02607_exon7-antisense
siR140269	AGTAATGTTTATTGTGAGGGCGCG	24	0	0	0	0	0	0	0	11.4109	0	0
siR140366	AGTACACCAGAACGATGGGACGGA	24	0	0	1.40614	0	0	0	0	17.1163	10.9588	4.62846	LTR/Gypsy:0					LOC_Os08g25410.1|13108.m02607|1000bp_UpstreamSeq|15459622..15458620
siR140452	AGTACATGCCGTGGGACGGGCGCA	24	9.33405	4.51218	1.49402	0	0	13.4995	19.4492	4.12059	8.36034	0.867836				13108.m02607_intr4-antisense
siR140455	AGTACATGCTCGACCGCCTTGGAC	24	3.36868	0	0	0	0	34.1356	21.4112	13.4395	4.34963	0			13108.m02607_exon7-sense
siR140709	AGTACGGGTATGAATGAAGTGGCG	24	24.4229	11.7317	3.95476	0	0	42.906	55.362	23.2021	0	5.49629
siR140722	AGTACGTCAGGTGGTGGAATACGG	24	0	0	0	0	0	0	50.6703	0	0	0
siR140738	AGTACGTGGCCTCTGGAAAAGACG	24	0	0	0	0	0	0	47.0875	0	0	0
siR140788	AGTACTCGTCGCGTTGCTTGGCCA	24	6.52682	3.00812	0	1.37367	1.40734	0	3.41214	1.71163	12.371	1.59103		13112.m03279_exon3-antisense
siR140822	AGTACTGTATAAGCCAAAGTGGTA	24	4.56176	0	0	0	0	12.1237	13.5633	10.3966	5.30994	0
siR140842	AGTACTTCTTTAGGCAGTCGGCAC	24	4.84248	0	0	0	0	32.5879	0	0	0	0
siR140886	AGTAGAAGAGAGCTTGCATGCTAG	24	0	0	0	0	0	12.6396	10.0658	0	0	0				13106.m02474_intr2-antisense
siR140903	AGTAGAATCTAGTAGTTGACCATC	24	0	0	0	0	0	36.2852	34.3773	0	2.48551	0							LOC_Os10g30690.1|13110.m02649|3-UTR
siR140905	AGTAGAATGAGAGGTGGAGTAAGG	24	0	0	0	0	0	24.3334	16.293	0	0	0
siR140925	AGTAGACACGATTAACGAGGATTG	24	6.10573	0	0	0	0	25.7092	26.1882	0	0	0
siR140969	AGTAGAGACGAGACACACAATTTA	24	6.03555	0	0	0	0	0	4.00927	13.5662	7.40003	0
siR140971	AGTAGAGACGCACCGCACACCTTT	24	2.31597	0.676827	0.263651	0	0.469114	0	2.04728	11.4109	5.14048	0.795516
siR141002	AGTAGAGCTGCACATGACCTATAG	24	0	0	0	0	0	12.5536	5.80064	4.81792	1.35573	0.795516				13107.m00837_intr3-antisense
siR141007	AGTAGAGGCACTTCAAGAACTAGA	24	0	0	0	0	0	0	0	0	10.168	0
siR141008	AGTAGAGGCATGTGGATTTAGTCA	24	0	0	0	0	0	24.1615	0	0	0	0
siR141012	AGTAGAGGGAAAGTGACTTAATGG	24	0	0	0	0	0	0	0	19.4619	0	0
siR141031	AGTAGATACAAGAAGATAAGAGCA	24	0	0	0	0	0	66.8095	0	25.4843	0	0
siR141034	AGTAGATACCTACAAGACTTCGGG	24	0	0	0	0	0	0	0	18.7645	0	0					13108.m02607_intr1-sense
siR141068	AGTAGATGGTAATAAACTCGATCA	24	9.40423	0	0	0	0	0	27.2971	0	0	0
siR141077	AGTAGATTAGTGGCTCAAGAGTGA	24	0	0	0	0	0	14.1873	0	0	0	0	LTR/Copia:0
siR141169	AGTAGCCGGCGGTGTAGTAGCTTG	24	0	0	0	0.343418	0	14.4453	16.8048	9.57245	2.82444	0
siR141235	AGTAGCTGAGTGTAGATAGACCAA	24	0	0	0	0	0	0	31.5623	0	0	0
siR141311	AGTAGGCTGCCGAAGCATAGACGT	24	0	0	0	0	0	0	0	0	15.9298	0						LOC_Os11g28370.1|13111.m02728|1000bp_UpstreamSeq|15869584..15870586
siR141363	AGTAGGTGGTAGGCGTTTAGGCTG	24	0	2.40649	0	0	0	15.3911	0	0	0	0
siR141700	AGTATATGATAATCAGGAAGGTGG	24	0	0	0	0	0	42.3041	38.0454	0	0	7.7382
siR141776	AGTATCCCAACAACATGATCGCGT	24	12.1413	0	0	0	0	0	0	22.9485	0	0
siR141806	AGTATCGAAGAAAGCCTAAGACTG	24	0	0	2.10921	0	0	0	0	40.255	0	0						LOC_Os12g09060.1|13112.m00961|1000bp_UpstreamSeq|4735236..4734234
siR142024	AGTATTCGAGACCGTGCACACAAT	24	0	0	0	0	0	10.2321	6.56837	0	2.93742	0
siR142067	AGTATTTAATGATCCGGACAATAT	24	0	0	0	0	0	0	0	0	27.0581	1.88031
siR142544	AGTCACGATTGTCGCTGGTGCATG	24	56.4254	25.0426	11.6006	0	0	75.0639	103.644	28.7173	45.417	6.79805
siR142947	AGTCCAAGGAGGTCGAGCAGGTAC	24	0	4.28657	0	0	0	46.0874	24.3115	15.0243	0	0		13108.m02607_exon5-antisense
siR142954	AGTCCAAGGCGGTCGAGTAGGTAC	24	19.6506	12.4837	3.25169	0	0	7.56658	6.48307	3.67683	17.9069	0.506237		13108.m02607_exon4-antisense
siR143129	AGTCCCCCTACCTCGTTGGATCAC	24	0	0	0	0	0	0	35.2304	0	0	0
siR143593	AGTCCTCTGAGCTAACTTTCCGGC	24	15.2292	9.55078	3.60323	1.54538	0	75.1499	59.1153	55.2793	18.9237	8.02748
siR144058	AGTCGTCGAGACAATCAGAGGAGG	24	0	4.43697	0	0	0	16.4229	15.184	11.7912	10.9588	0
siR144127	AGTCTAAGATCGTAAAAAATGGAC	24	11.0184	5.48982	0	0	0	0	0	0	0	0	LTR/Copia?:1
siR144194	AGTCTAGAACACTGCAGGTGCCGC	24	0	0	0	0	0	208.081	0	0	0	0
siR144320	AGTCTCCGTCGAGATTGACGCCAT	24	0	0	0	0	0	0	0	0	13.1619	0						LOC_Os01g19300.1|13101.m02099|1000bp_UpstreamSeq|10923332..10922330
siR144446	AGTCTGAACCAGAGGAGCAAGTGA	24	0	4.81299	1.31825	0	0	30.6962	33.439	24.5334	0	2.53119
siR144540	AGTCTGTAGATTCAAGGTATGGCA	24	0	0	0	0	0	76.6116	77.6262	42.7907	0	6.87037
siR144610	AGTCTTAGCGCAGTCGGGTATTGG	24	7.22863	4.21137	1.84556	0.0858545	0	15.993	20.2169	6.9733	9.65958	1.30175
siR144628	AGTCTTATCAAACTGAATCGTCAC	24	27.16	0	0	0	0	0	0	15.5315	0	0				13108.m02607_intr1-antisense
siR144911	AGTCTTTGGATTGATGCAGGGGCG	24	0	0	0	0	0	12.8116	0	0	0	0
siR145066	AGTGAAGACTCGCATCAGCAACGT	24	0	0	0	0	0	0	0	13.2493	0	0
siR145084	AGTGAAGCCTGAGAAGAAGAAGAC	24	0	0	0	0	0	0	22.5201	27.703	0	0
siR145085	AGTGAAGCCTGCAGAGAAGAAGAC	24	0	0	0	0	0	16.251	0	0	0	0
siR145093	AGTGAAGGGCAGCAGCACAGCATA	24	0	0	0	0	0	74.2041	0	0	0	0
siR145218	AGTGACATCTGGTACGTGGAATCA	24	0	0	0	0	0	0	0	0	11.4672	0						LOC_Os02g46860.1|13102.m05266|1000bp_UpstreamSeq|28582924..28581922
siR145311	AGTGACGAGTGCATAATGAGAATA	24	0	0	1.84556	0.77269	0.469114	0	2.98562	7.35367	11.1283	3.97758					13107.m00265_intr2-sense
siR145360	AGTGACTACAGAAGATATATTCAA	24	19.7208	14.6646	0	0	0	30.2663	27.553	0	0	8.67836
siR145374	AGTGACTCGATCATCAACAAGCTG	24	0	0	0	0	0	15.993	0	0	0	2.16959					13102.m03554_intr2-sense	LOC_Os02g32780.1|13102.m03553|1000bp_UpstreamSeq|19464461..19463459
siR145456	AGTGAGACGTGAGTGGGAAGACTA	24	0	0	0	0	0	30.0944	0	12.0448	0	0						LOC_Os06g19790.1|13106.m02114|1000bp_UpstreamSeq|11301571..11302573
siR145672	AGTGATCTGCTGTAGTTACTGGTA	24	3.01778	0	0	0	0	12.8116	17.3166	8.36797	3.67177	0
siR145680	AGTGATCTGGTGTAGTTGTCGATA	24	4.7723	3.30893	0.703069	0	0	27.6008	23.2026	9.88941	8.24736	2.60351					13108.m02607_intr6-sense
siR146068	AGTGCCTGACCTGACATGACTGCT	24	0	0	5.80032	0	0	138.52	116.269	0	44.3437	0
siR146214	AGTGCTGGGAGACGTCACCAAACA	24	0	0	0	0	0	0	0	14.01	0	0
siR146275	AGTGGAACGACTGCACAAAGGCAT	24	0	0	0	0	0	24.1615	0	0	0	0
siR146291	AGTGGAAGTCAATGTTGGAAGTCA	24	17.1943	0	0	0	0	48.5809	48.8789	0	8.41683	0
siR146341	AGTGGACGGCTCAAGCGACGATGG	24	13.0536	0	0	0	0	0	0	0	0	0
siR146373	AGTGGAGCATGTTAGAAGTGGAGC	24	14.3871	0	0	0	0	0	0	0	0	0
siR146484	AGTGGATTGGTCACGCATCGCCGC	24	4.14067	0	0.96672	0	0	17.8846	10.1511	0	0	0						LOC_Os12g40000.1|13112.m04157|1000bp_UpstreamSeq|24697598..24696596
siR146504	AGTGGCAGAAGAAGGAACAGAGCA	24	0	0	0	0	0	34.6515	0	27.1959	2.37253	1.73567
siR146567	AGTGGCGACATGAGAACCTAAGGG	24	3.43886	2.25609	0	0	0	15.5631	0	8.49475	5.19697	1.51871				13107.m00837_intr3-antisense
siR146584	AGTGGCGTGGATTGGCGATGCGGG	24	7.64971	3.91055	0	0	0	18.9165	19.108	11.4743	7.68247	0		13112.m04157_exon1-antisense
siR146593	AGTGGCTCAAAGAATTGTTATGGT	24	0	0	0	0	0	0	31.9035	0	0	0
siR146684	AGTGGGTGTGTTGTAGATGGTTAT	24	0	0	0	0	0	0	0	11.9814	0	0
siR146699	AGTGGTAAGGTAGCATGTGTACGT	24	7.15845	0	0	0	0	25.6232	12.5396	9.82602	5.98781	0
siR146811	AGTGGTCTGAACGAGGTACTAGAG	24	0	9.92679	0	0	0	81.8567	0	50.2078	21.6917	0		13108.m02607_exon3-antisense		13108.m02607_intr2-antisense
siR147008	AGTGTAGAGGATAAACATGTATGC	24	5.61447	4.58738	1.0546	0	0	26.655	22.0936	10.6501	7.85194	2.09727
siR147011	AGTGTAGATAGACCAAAGCTCAAG	24	0	2.93292	0	0	0	41.1003	29.0032	22.1878	0	0
siR147023	AGTGTAGCCTGATAAGTGAGTTGG	24	3.2985	0.827232	0	0	0	13.6714	12.9661	0	3.55879	0
siR147038	AGTGTAGGAGCACTGGATGCCGGG	24	0	0	0	0	0	0	35.4863	0	0	0					13107.m00837_intr4-sense
siR147042	AGTGTAGGCATAGTAAAAAAACAA	24	0	0	0	0	0	15.0472	0	0	0	0
siR147065	AGTGTAGTGTTTTTGAGTTGAAGA	24	0	5.26421	0	0	0	26.9989	17.7431	15.6582	0	2.38655	LTR/Gypsy:1
siR147537	AGTGTTACTGCACAGAGGTCGTCA	24	25.8266	0	0	0	0	0	3.32684	0	0	1.08479
siR147595	AGTGTTGAGCCTGCAATGCGTCGT	24	0	0	0.263651	0	0	18.7445	22.5201	7.73403	2.88093	0
siR147761	AGTTAAGTCCAAGGAGGTCGAGCA	24	0	0	2.02132	0	0	0	52.8882	48.623	9.94202	4.55614		13108.m02607_exon5-antisense
siR147827	AGTTACCACGACTGATATGCTTAC	24	6.10573	5.33941	1.75767	0.343418	0	11.1779	15.6105	9.69923	6.0443	2.9651
siR147929	AGTTAGAGGACTCAGGCTTATACC	24	0	0	0	0	0	36.8871	0	0	0	0	LTR/Gypsy:1
siR147967	AGTTAGGACGAATGGTGGCGGTGA	24	0	0	0	0	0	15.3051	0	0	0	0
siR148167	AGTTCAAGGTGTTAGACGGACTTC	24	0	0	0	0	0	0	0	0	10.3374	3.90526	DNA:0
siR148270	AGTTCATGAGCTCTGATTAGTAGA	24	0	0	0	0	0	48.9248	0	0	0	0					13108.m02607_intr1-sense
siR148383	AGTTCCTGATTGATCGTGATGTTT	24	6.17591	5.79063	2.02132	0.257563	0	8.34044	13.3074	4.88131	11.1283	1.73567
siR148553	AGTTCTCAAGACTGATTGACCAAT	24	0	0	0	0	0	25.3652	0	0	0	0
siR148773	AGTTGACGCTCTCTACTCACCATT	24	2.59669	0	0	0	0	0	12.2837	0	3.5023	0
siR148849	AGTTGAGCTCTGGGTACTGTCGAA	24	2.9476	1.80487	0	0	0	22.4418	18.1697	11.7912	2.71146	1.08479	LTR/Gypsy:1				13111.m03701_intr1-sense
siR148865	AGTTGAGTCCAAGGCGGTCGAGCA	24	0	0	0	0	0	33.7057	24.4821	12.4886	0	0		13108.m02607_exon7-antisense
siR148965	AGTTGATTTGCGCGGACCATGGCT	24	0	0	0	0	0	59.5008	47.2582	16.3556	4.57559	0						LOC_Os01g16630.1|13101.m01861|1000bp_UpstreamSeq|9436432..9437434
siR149160	AGTTGCTGCTCAGATAGAGGGACG	24	3.2985	1.20325	0	0	0	12.5536	13.7339	5.83222	3.38933	2.02495		13105.m04596_exon2-antisense
siR149183	AGTTGGAACTTGGAAGTAAAAGGA	24	0	0	0	0	0	0	0	0	11.8626	0
siR149259	AGTTGGGTACGTAAACAGAAGATG	24	0	3.00812	0	0	0	84.3502	0	42.2202	5.70537	0
siR149280	AGTTGGTGGAGTTGGAGACGATGA	24	0	0	0	0	0	0	0	0	23.8383	0
siR149307	AGTTGGTTGTAGGACGGATGTAAA	24	0	3.30893	0	0	0	36.0272	30.3681	22.9485	5.19697	1.59103
siR149362	AGTTGTAGATGAAGGCAGTGGAGC	24	0	0	0	0	0	0	2.81502	0	0	29.9403		13110.m00412_exon1-antisense				LOC_Os10g04940.1|13110.m00411|1000bp_UpstreamSeq|2412403..2411401
siR149661	AGTTTAAGGCTTTCATGAATACAC	24	2.9476	0	0	0	0	19.4324	10.5776	7.67064	4.40612	0				13106.m02474_intr2-antisense
siR149692	AGTTTACCGTCGATGGCAATATCT	24	0	0	0	0	0	0	0	0	11.0153	0
siR149954	AGTTTGAGACTTGAGGCACCATGC	24	0	0	0	0	0	13.6714	0	5.83222	3.84124	0
siR150497	ATAAACAGGAGGTAGGCAAAGTTG	24	0	0	0	0	0	71.0227	0	0	0	0
siR150594	ATAAACTTAGGGCTTGTTCGGTAG	24	0	10.4532	0	0	0	0	0	24.3432	0	0
siR150631	ATAAAGACATGTGGCGCGGGACTG	24	0	0	0	0	0	0	16.7195	9.25548	0	0
siR150743	ATAAATAACGTACCGGAGATGATA	24	6.2461	2.5569	0	0	0	17.1108	19.108	12.235	0	0
siR150790	ATAAATATGTAAAACGAAATGGCA	24	0	0	0	0	0	0	43.2489	0	29.3177	0			13105.m04596_exon1-sense
siR150803	ATAAATCATAGTAGAAGAGAGCTT	24	0	0	0	0	0	0	173.763	0	0	0				13106.m02474_intr2-antisense
siR151084	ATAACATTGTCGACATTGCGGTTC	24	4.14067	0	1.0546	0	0	0	0	10.7769	0	0
siR151235	ATAACGAACTTGAGGAATGCAGCG	24	15.2994	7.5955	1.93344	0.686836	0	57.5232	54.1677	40.6987	0	7.15964
siR151287	ATAACGGAGCAACTGACAGTGTGT	24	0	0	0	0	0	0	0	14.2002	10.5069	0
siR151407	ATAACTGTCCTCGGAATTGACTGC	24	14.8783	0	0	4.722	0	0	13.5633	38.0996	32.1421	0		13104.m04542_exon4-antisense		13104.m04542_intr3-antisense
siR151496	ATAAGACATCCAAGCATACTCTCG	24	0	0	0	0	0	13.5855	11.6013	0	0	0.650877	LTR/Gypsy:1
siR151831	ATAAGATCATCAGAAATTCGGAGG	24	0	0	0	0	0	0	0	13.8832	15.9863	0
siR151849	ATAAGATGGAATAAGGAAAGATGT	24	7.93044	9.24996	0	0	0	0	2.13259	9.19208	13.7268	4.99005
siR151898	ATAAGCAATGCAAGACCGTAGTTA	24	0	0	0	0	0	33.1038	28.4061	19.8422	5.76185	0
siR151903	ATAAGCACGAGCATAGAGCGGTTG	24	2.66687	0	0	0	0	0	10.9189	9.50905	0	0
siR151920	ATAAGCAGTTGGATGGTGTCGTGC	24	0	0.827232	0	0	0	0	9.21278	12.1082	0	0
siR152085	ATAAGGAGGGGAAGAGATGTGATG	24	0	0.902435	0	0	0	0	19.108	6.46616	0	0					13106.m05162_intr1-sense
siR152088	ATAAGGATGGAGAGGTTGGTTTGT	24	0	0	0	0	0	0	27.1265	0	0	0
siR152136	ATAAGGTCTAGGGCGAGGTGGTAA	24	0	0	0	0	0	0	0	21.6172	0	0			13106.m02114_exon1-sense		13106.m02114_intr1-sense
siR152176	ATAAGTACCAGGAGTAGCAGATGT	24	2.80723	0	0	0	0	17.1108	9.89521	10.7769	1.92062	0			13105.m00973_exon2-sense
siR152187	ATAAGTAGACGCGGTTCCAATTGG	24	10.0359	5.189	2.72439	2.40393	0	0.429919	12.1984	23.7726	14.0657	5.27933		13104.m00770_exon3-antisense
siR152189	ATAAGTAGATAAGCATCATTCCCT	24	0	0	0	0	0	25.7092	0	0	0	0	LTR:0
siR152269	ATAAGTGGAGCAAAAGACGAATAT	24	0	0	0	0	0	44.4537	0	0	0	0					13112.m00961_intr1-sense
siR152405	ATAATAGAGAGGGAAGTCGGTGTT	24	0	0	0	0	0	18.7445	0	0	0	0			13101.m01861_exon1-sense
siR152559	ATAATCCAATATTTTTTGCCGGAC	24	0	3.38413	0	0	0	18.5725	17.4019	0	0	2.09727
siR152639	ATAATCTCATCAAGCAGTAGACTA	24	0	0	0	0	0	91.1429	0	81.3341	0	0						LOC_Os01g16630.1|13101.m01861|1000bp_UpstreamSeq|9436432..9437434
siR152767	ATAATGGAAGGATGTAGCGGCGTG	24	0	0	0	0	0	0	15.5252	0	0	0
siR153099	ATACAACTGGTAGCGGAAATTGCA	24	0	0	0	0	0	15.821	0	0	0	0				13112.m00961_intr1-antisense
siR153126	ATACAAGGAAACAGCTATGAATGA	24	20.8437	0	3.51534	0	0	0	0	0	0	0
siR153132	ATACAAGGGCGGATATAGAGTGTA	24	0	0	0	0	0	12.4677	0	0	0	0
siR153283	ATACACACAGTACTTTGAGTCCGT	24	0	0	0	0	0	0	38.7278	0	14.0092	0
siR153471	ATACACTAGCTTGGAATTCGATAT	24	18.247	9.24996	0	0	0	74.72	65.8543	35.5005	15.5344	3.90526					13107.m00837_intr4-sense
siR153513	ATACACTGTTCATCCTATACTCCC	24	3.78977	0	0	0	0	16.9388	0	0	0	0	DNA/MuDR:1
siR153584	ATACAGGGTGATAGAGAACAATCA	24	0	0	0	0	0	15.3911	0	0	0	0
siR153629	ATACATAAATCCGGAGTGCGTGCA	24	3.2985	0	0	0	0	12.6396	14.6722	0	0	0
siR153668	ATACATACTCTGCCGGTACCTTAT	24	3.08796	1.72967	0.878836	0	0	15.821	12.0278	9.95281	4.40612	2.02495
siR153718	ATACATCAGGCAATCATAGATCCA	24	0	0	0	0	0	26.3971	21.1553	0	8.41683	0						LOC_Os01g20170.1|13101.m02191|1000bp_UpstreamSeq|11470443..11471445
siR154433	ATACCCGACTGCGCTAAGACTGCC	24	27.0898	0	0	0	0	165.777	105.009	0	0	19.9602
siR154666	ATACCGGGTAGAAAATGCATTATT	24	0	0	0	0	0	0	16.7195	0	0	1.01247
siR154800	ATACCTATCAGAAGATCAAGACCT	24	5.89519	4.73779	0	0	0	20.2922	16.5489	0	0	3.83294	LTR:0
siR154978	ATACCTTCCCCGCACGCTGGATAA	24	0	0	0	0	0	26.0531	20.3022	0	7.68247	0		13112.m04157_exon1-antisense		13112.m04157_intr1-antisense
siR155031	ATACGAACCGCTCTAGACTGTAAA	24	9.5446	0	0	0	0	29.4065	29.3444	0	0	6.87037
siR155033	ATACGAACCGGGACTAAAGATGAT	24	0	0	0	0	0	0	0	24.2798	11.5802	0	DNA/En-Spm:0
siR155168	ATACGATGTGGAAGGCCAAACTAA	24	0	0	0	0	0	0	0	0	19.6016	0
siR155397	ATACGTGCGTCTAGAGGGAGTGAA	24	4.21085	1.35365	0.439418	0	0	13.1555	13.5633	9.38226	2.54199	0.506237
siR155399	ATACGTGCGTGTAGAGGGAGTTAG	24	6.38646	1.65446	0.175767	0	0	25.7092	23.2879	11.0305	2.54199	0.867836
siR155471	ATACTAAGAAACACGCTGTGCTCC	24	0	0	0	0	0	0	0	11.9814	0	0
siR155782	ATACTCCTAGACAGTCGGCCATTA	24	0	3.30893	0	0	0	14.1014	14.6722	7.67064	5.47941	0
siR155803	ATACTCGCAGATCGGACACACTAC	24	0	3.15852	0	0	0	11.6078	0	0	0	0
siR156305	ATACTTCTGTGTATTCATGAAAGC	24	0	0	1.58191	0	0	21.0661	20.5582	0	0	6.65341					13106.m02474_intr2-sense
siR156401	ATACTTTAGTACCAACAAATCTCA	24	6.17591	3.83535	0	0	0	10.0601	9.6393	11.0939	4.29315	3.3267				13108.m02607_intr3-antisense
siR156411	ATACTTTCAGCACTGGCGCCTTCA	24	8.56206	4.43697	0	0	0	0	0	14.5172	7.17407	0
siR156523	ATAGAACGATAGTTGGCCCGATAA	24	8.84279	4.36177	1.23037	0	0	17.5407	17.6578	11.7278	8.13438	2.31423
siR156531	ATAGAACTCCACTGGCATGTTTAA	24	93.13	53.3941	0	0	0	307.134	283.805	290.787	91.8507	0
siR156562	ATAGAAGTAGGGTAAGTCGTGAAC	24	0	0	0	0	0	0	0	0	25.7024	8.60604
siR156619	ATAGACATTTCAGAGAACAACGGA	24	124.431	69.3371	0	0	0	327.083	0	291.484	0	0	LTR:0
siR156621	ATAGACCAAAGCTCAAGCGACTTC	24	0	7.5203	0	0	0	36.3712	0	0	14.7436	0
siR156694	ATAGACGTCCTAGAGCAGATACGA	24	0	0	0	0	0	29.8364	16.6342	21.4905	0	0						LOC_Os11g28370.1|13111.m02728|1000bp_UpstreamSeq|15869584..15870586
siR156735	ATAGAGAAACTGGCCCATCAGCAT	24	1.96506	0	0	0	0	9.20028	10.3217	3.74023	1.92062	0
siR156744	ATAGAGACCTACTAGACTAGTACG	24	7.36899	4.06096	0.527302	0.257563	0	23.6456	23.885	16.7359	9.65958	3.76062
siR157174	ATAGCAGCGCTGGGAAAATATGGA	24	0	0	0	0	0	18.5725	0	0	0	0
siR157178	ATAGCAGGGGTAGAAGCGATCTTC	24	0	0	0	0	0	31.4701	24.8233	19.2717	0	0
siR157280	ATAGCCACCTCCAATCTCGTCGAG	24	2.59669	1.05284	0.175767	0.257563	0	14.5313	15.2693	4.18398	1.69466	0.650877				13108.m02607_intr3-antisense
siR157574	ATAGCTCTAATGATCACCGGTTAA	24	11.1588	0	0	0	0	0	10.407	9.50905	15.252	0
siR157645	ATAGCTTATGTAGGTAGTAGGGTG	24	0	2.10568	0	0	0	0	10.6629	0	0	0.723196
siR157744	ATAGGACGATTACAGAGGGTGGAA	24	0	0	0	0	0	0	0	0	22.3131	0
siR157778	ATAGGAGCTATAGAAATCATCGGG	24	0	0	0	0	0	0	0	0	26.9451	0
siR157830	ATAGGATGTGGAGAAGGCCCTTTG	24	0	0	0	0	0	0	0	10.3966	0	0				13112.m03279_intr2-antisense
siR157842	ATAGGCAAAATCTTGACGTCTGGC	24	0	0	0	0	0	17.5407	0	0	0	0	LTR/Gypsy:0
siR157859	ATAGGCAGTCTTAGCGCAGTCGGG	24	7.71989	2.85771	1.49402	0	0	34.0496	30.5387	14.7707	6.72216	0.867836
siR158113	ATAGGTTCTGGATGATTATGATGG	24	11.9307	0	2.02132	0	0	49.7847	0	20.7297	0	0
siR158164	ATAGTACAAGAGGAAAAGGAGACG	24	16.0012	0	0	0	0	0	4.69169	0	0	0			13101.m07147_exon1-sense
siR158244	ATAGTATACCTTGAACCAGATGCA	24	0	0	0	0	0	0	0	0	30.8429	0		13102.m03185_exon3-antisense		13102.m03185_intr3-antisense
siR158422	ATAGTCTAGAACACTGCAGGTGCC	24	0	2.03048	0	0	0	28.3747	21.5818	13.3127	0	0
siR158493	ATAGTGATTTAAGGGTATGGCTAA	24	0	0	0	0	0	37.489	26.7853	0	0	0
siR158618	ATAGTTGAACCGGAGATGACGAGG	24	0	0	0	0	0	0	0	0	43.1009	0
siR158689	ATATAAAAATCGGTCTTGTCGTGC	24	0	0	0	0	0	0	47.6847	22.1878	0	0	DNA/MuDR:0
siR159043	ATATACGAGCGATGAAATCTGGGA	24	0	0	0	0	0	11.8658	0	0	0	0
siR159761	ATATATTGGACACTGTCAGTTGAC	24	0	0	0	0	0	0	16.293	0	0	0					13106.m02474_intr2-sense
siR159855	ATATCACACGTTGGTCAGTTTGGT	24	10.5973	0	0	0	0	0	33.8655	15.9118	0	0
siR160067	ATATCCAACGTAGCCGGCTGATTC	24	6.2461	2.70731	0.790953	0.0858545	0.187646	15.3051	17.0607	12.3618	6.21376	1.73567
siR160112	ATATCCACCGAGCAACTCCAGCAT	24	0	0	0	0	0	10.92	0	0	0	0
siR160315	ATATCCGCACGTGCGAAAGATCGT	24	6.31628	4.21137	0	0	0	7.9965	13.6486	0	0	0
siR160528	ATATCGATATAGAACTGACGGTGG	24	0	26.7723	0	0	0	0	0	0	0	0
siR160859	ATATCTTGTAGAGGCATTCTTTCG	24	0	8.72354	0	0	0	28.4607	36.9364	20.9833	19.3756	0
siR161034	ATATGAGGAAAGCTACGAATCGGA	24	0	0	0	0	0	0	19.7904	0	0	0
siR161095	ATATGATTAGAGAAGATGTGGTAA	24	0	0	0	0	0	0	0	53.6311	0	0
siR161387	ATATGGACATATTAATAGGCGACA	24	0	0	0	0	0	0	11.3454	0	0	0
siR161433	ATATGGCGAGAATAGAGAAAATGA	24	0	10.5284	0	0	0	18.3146	0	0	0	0
siR161491	ATATGGTGACAGGCTGACAGCGAT	24	89.8315	25.2682	0	0	0	0	0	0	65.7529	17.5737				13101.m01138_intr2-antisense
siR161523	ATATGTAAGTAGAGGGGGCCTTGG	24	0	0	0	0	0	0	8.35975	10.143	0	0
siR161537	ATATGTACCCGTCAAACCACTCGA	24	3.85995	1.42886	0	0	0	18.4006	11.4307	9.38226	5.0275	1.37407	LTR:0
siR161723	ATATGTGACGATGGATACAATTTA	24	2.87741	1.80487	0	0	0	10.0601	10.1511	4.37416	1.80764	0.0723196
siR161972	ATATTAGGGATTGTGTGCATTTAA	24	0	0	0	0	0	10.404	0	0	0	0
siR162430	ATATTGGCGTAGAGGCAAGAAATT	24	0	0	4.3063	0	0	0	0	15.4681	0	5.13469		13108.m02988_exon6-antisense
siR163028	ATCAAAAGGATAAGTGGATGGTAT	24	14.8082	0	0	0	0	0	0	0	0	0	DNA/En-Spm:1		13101.m02191_exon4-sense
siR163105	ATCAAACCGGCCTACTCCACCTCC	24	2.10543	0.601624	0	0	0	12.8116	6.31246	4.56434	1.58169	0.361598						LOC_Os08g33600.1|13108.m03502|1000bp_UpstreamSeq|20978983..20979985
siR163248	ATCAAATACTTTCAAGATCGTGGT	24	0	0	0	0	0	0	0	10.9037	0	0
siR163348	ATCAACAACGAGATACTAGGGCAT	24	8.56206	0	0	0	0	25.1073	21.7524	8.74833	0	1.01247	DNA/MuDR:1
siR163646	ATCAACTAGTAGACAAACATGCAG	24	0	0	0	0	0	134.565	0	0	0	0
siR163721	ATCAAGAACCCACAACCAAAGACT	24	3.22832	2.85771	0.790953	0	0	19.7763	15.8665	12.8689	6.38323	0
siR163745	ATCAAGACAGAGCACCTCGTCCCT	24	0	0	0	0	0	12.5536	0	0	0	0			13105.m04596_exon2-sense
siR163763	ATCAAGAGGATGAGCGAGCGTGAG	24	0	1.50406	0.439418	0	0	17.8846	0	0	0	0.0723196
siR163821	ATCAAGCGATGGCACTCCGATTAG	24	0	0	0	0	0	0	10.6629	0	0	0
siR163892	ATCAAGTAGTGGCGCTCCGGTTGG	24	0	0	0	0	0	20.2922	0	0	0	0						LOC_Os01g19300.1|13101.m02099|1000bp_UpstreamSeq|10923332..10922330
siR163988	ATCAATATCAAGAATCGTCGAGTT	24	0	0	0	0	0	11.6938	0	0	0	0		13107.m00837_exon7-antisense
siR164056	ATCAATCGGCCATAGCAGAGTACA	24	4.14067	2.33129	0	0	0	9.45823	11.8572	0	4.91452	0
siR164257	ATCACAAGCCATGTAGCATCTTCA	24	0	0	0	0	0	21.9259	20.3022	0	0	0				13108.m01397_intr4-antisense
siR164336	ATCACACGTTGGTCAGTTTGGTAA	24	16.7732	0	0	0	0	72.7424	74.1288	33.2817	25.7589	9.90779
siR164706	ATCACCATGCAGTTAGACTATCCA	24	4.98284	0	0	0	0	0	14.6722	12.9957	0	2.38655			13105.m04596_exon2-sense
siR165022	ATCACTAGAGACGGTGCATGAACG	24	0	0	0	0	0	14.7032	0	7.9876	0	3.39902
siR165062	ATCACTCCTAAACTGACTGAAGAC	24	0	0	0	0	0	10.92	0	0	0	0				13108.m01397_intr4-antisense
siR165102	ATCACTGCAGCATTCATCGGCGTC	24	25.2651	0	0	0	0	46.6033	61.7598	29.3513	14.2352	0			13107.m00837_exon5-sense		13107.m00837_intr4-sense
siR165139	ATCACTGTGCTGCTCACCGGATTG	24	0	1.95528	0	0	0	0	10.6629	17.877	8.5298	0				13109.m01055_intr3-antisense
siR165222	ATCAGAACTGCTTGTATTATTCGG	24	12.3518	7.5203	1.75767	0	0	48.8388	37.7895	25.928	11.8062	5.20701
siR165223	ATCAGAACTGGCAAGCGTAGGACG	24	0	0	0	0	0	18.6585	11.0895	0	0	0
siR165247	ATCAGAATTATTGTGCGGCTCATC	24	7.93044	4.58738	0	0.0858545	0	14.5313	20.2169	10.2064	7.34354	1.08479
siR165308	ATCAGACTCTCAGTTGTACGTCCT	24	0	0	0	0	0	0	52.2911	0	0	0
siR165416	ATCAGATTTGTGAAGCCGTCAGAA	24	8.77261	4.51218	1.58191	0	0	20.0342	22.1789	15.4047	6.5527	0
siR165449	ATCAGCAGGAGAGGAGAGCTAGCA	24	0	2.25609	0	0	0	47.3771	28.7473	29.4781	2.93742	2.02495
siR165705	ATCAGGGAAAAGCAGAAAGTGAAT	24	0	0	0	0	0	12.6396	8.95687	0	0	0				13101.m02191_intr2-antisense
siR165737	ATCAGGTCTAGCAGAAGAATGTGT	24	0	17.7479	0	0	0	0	0	85.0743	35.4749	33.7733				13109.m03271_intr1-antisense
siR165774	ATCAGTAAGACAGTAACCTAACCA	24	0	0	0	0	0	18.0566	0	0	0	0
siR165796	ATCAGTAGCACACTTTAGGATGGT	24	21.7561	5.86583	0	0	0	81.5127	70.2048	40.1916	9.60309	0
siR166271	ATCATATCTCCATAAGGTCGGTAA	24	5.47411	0	0	0	0	19.0024	22.4348	0	6.32674	2.31423
siR166782	ATCATGAATGATCTGACCGTTGGA	24	35.7221	19.1016	0	0	0	99.3114	117.975	49.7006	51.4048	14.7532					13112.m04157_intr1-sense
siR166822	ATCATGATGCTTGGTTGGATGTGT	24	7.50935	2.85771	0.703069	0.171709	0	38.0909	28.9179	10.7769	7.0611	2.09727
siR166885	ATCATGCCTTGTAAAGATCGTCAT	24	61.7591	0	29.0016	0	0	0	0	9.12869	95.2965	12.7283						LOC_Os10g04950.1|13110.m00412|1000bp_UpstreamSeq|2413300..2412298
siR167107	ATCATTCAGACGACTAGCATAACA	24	3.71958	0	0	0	0	0	15.6958	0	0	0
siR167180	ATCATTGAACACTTGTCGGAGTCG	24	10.878	5.48982	0	0	0	16.3369	24.9086	0	10.7894	0
siR167225	ATCATTGGAGAGAATAGCATGTAA	24	5.89519	4.43697	0	0	0	19.0024	16.0371	9.76263	7.56949	2.67583					13106.m02474_intr1-sense
siR167234	ATCATTGGGAGTCAGAGTCAGGTA	24	4.70212	2.4817	1.40614	0	0	27.8588	18.6815	10.6501	5.19697	2.9651
siR167246	ATCATTGTAAGCAGAGCGAATTAA	24	3.36868	0	0	0	0	13.0695	7.59201	10.9671	3.10688	1.73567			13102.m03554_exon2-sense		13102.m03554_intr2-sense	LOC_Os02g32780.1|13102.m03553|1000bp_UpstreamSeq|19464461..19463459
siR167326	ATCATTTGATACCGATGGACGTCT	24	7.64971	3.15852	0	0	0	19.9483	18.7668	11.2841	7.11758	2.45887	DNA/MuDR:1
siR167774	ATCCAATATTTTTTGCCGGACACA	24	0	0	0	0	0	0	70.9725	0	0	0
siR168961	ATCCCAGTAGACACGATTAACGAG	24	6.45664	3.53454	1.66979	0	0	21.41	27.553	14.6439	7.45652	3.25438
siR169009	ATCCCATGATAGAGAAACTGGCCC	24	0	0	0	0	0	10.662	8.27444	5.13489	0	0
siR169329	ATCCCGGGAAGATATGATGGCGTA	24	30.5287	0	0	0	0	88.7354	85.3035	36.2612	34.9101	4.19454
siR169787	ATCCGACCACTGCAAGCTCGAGGA	24	12.6326	0	3.69111	2.48978	0	0	14.7575	0	14.6306	0				13108.m01378_intr4-antisense
siR169941	ATCCGAGTTGACAAGTTTAGAATG	24	11.65	8.19712	0	0	0	37.6609	42.1399	24.8503	14.4046	4.62846					13112.m00961_intr1-sense
siR170205	ATCCGCGCGCTGCAGGACGGTTGT	24	23.7211	14.2886	0	0	0	202.32	129.405	115.25	38.8078	0
siR170270	ATCCGGAAGCAGCATAGATCACCT	24	0	0	0	0	0	49.1828	0	0	0	0	LTR/Gypsy:0
siR170489	ATCCGGTGAACAGTGATATTTGGA	24	1.96506	0	0	0	0	8.16847	10.3217	4.75453	2.59848	1.08479	DNA/hAT:0
siR170653	ATCCGTCAGAGAGCAAGGACAGCC	24	12.5624	7.97151	4.74572	0	0	0	0	36.6415	0	0		13107.m03750_exon3-antisense
siR171386	ATCCTCAGCATGAGACGTAGATGT	24	0	0	0	0	0	18.0566	15.4399	11.1573	0	0							LOC_Os01g16060.1|13101.m01782|3-UTR
siR172226	ATCCTTCCATTATTCCATCGTCAG	24	1.54398	0.225609	0	0	0	5.58895	11.9425	1.58484	1.12978	0.506237
siR172555	ATCGAACATTCCGAAGACTCGTCA	24	8.14098	3.76015	2.19709	0	0.281468	36.8871	33.8655	16.9261	7.68247	5.49629	LTR/Gypsy:0					LOC_Os11g37770.1|13111.m03701|1000bp_UpstreamSeq|21875588..21874586
siR172589	ATCGAACTGTCCAAGGTACTGGTA	24	5.82501	0	0	0	0	25.2793	33.6096	14.7707	8.19087	3.47134
siR172602	ATCGAAGAAAGCCTAAGACTGCAT	24	6.66718	0	0	0	0	29.4925	17.999	0	2.9939	0						LOC_Os12g09060.1|13112.m00961|1000bp_UpstreamSeq|4735236..4734234
siR172761	ATCGACAGTTGATTTGCGCGGACC	24	2.10543	0	0	0	0	14.3593	13.478	5.76882	2.76795	0						LOC_Os01g16630.1|13101.m01861|1000bp_UpstreamSeq|9436432..9437434
siR172874	ATCGACGGAAGAACATACTCCATT	24	32.2832	25.7194	5.00937	0	0	118.4	113.795	99.0843	34.0627	19.7433					13108.m02607_intr2-sense
siR172911	ATCGACGTTGCATACCTCTTAATA	24	4.63194	2.03048	0.175767	0.171709	0	10.1461	10.3217	9.19208	4.0107	0.940155	LTR/Copia?:0
siR172915	ATCGACTAAGTTGACGGAGAACAA	24	0	0	0	0	0	0	26.7	0	8.0214	0
siR172919	ATCGACTAGCTGTGCTCGCGGTCA	24	0	0	0	0	0	13.6714	16.9754	8.81172	0	0	LTR:1
siR172943	ATCGACTGTAAATATCAATGGTAT	24	0	24.817	0	0	0	0	82.4032	0	0	0	LTR/Gypsy:0
siR172948	ATCGACTGTTTATCCATACCTATC	24	0	0	0	0	0	24.1615	23.2026	0	0	0	LTR:0
siR173108	ATCGAGTTGGCAGGAGAAAGTAGA	24	0	0	0	0	0	0	0	40.0014	0	0		13109.m03271_exon1-antisense
siR173249	ATCGATGCATACAAACTCCTCTGG	24	4.07049	1.57926	0	0	0	8.85634	11.1748	9.0019	3.10688	0
siR173298	ATCGATTGAGAGCTAGTCAGGTGT	24	0	19.4776	0	0	0	0	102.62	53.5677	0	0
siR173473	ATCGCCGCTCAGATTGTCGCCGTG	24	10.1762	6.31705	5.00937	0	0	0	15.0987	13.693	16.3253	8.60604			13112.m03279_exon2-sense
siR173753	ATCGGACACACTACAAGCAGCAAC	24	0	0	0	0	0	12.9836	12.9661	0	10.7894	0
siR173785	ATCGGACGCTGACATCAGTATGAC	24	0	11.13	0	0	0	0	0	0	0	0	DNA/Tourist:0					LOC_Os07g11000.1|13107.m01131|1000bp_UpstreamSeq|6034078..6035080
siR173829	ATCGGAGTATATGATTGCATCGGA	24	0	0	0	0	0	0	15.6958	0	0	0
siR174048	ATCGGCTTTAGAGAGATGTGTGTG	24	0	3.76015	0	0	0	40.5844	34.292	0	0	0
siR174064	ATCGGGAGCATGTTGATGTGGTTG	24	0	0	0	0	0	0	0	13.1859	0	0
siR174239	ATCGGTTCGTGGGATACGTTGGCA	24	0	0	0	0	0	26.483	0	0	0	0	LTR/Gypsy:1
siR174464	ATCGTGAGGCAGAGACATCTAAGT	24	1.40362	0.676827	0	0	0	10.1461	8.27444	6.33937	1.97711	0
siR175252	ATCTAGAGCTCGTAGAAGAAAGCA	24	0	34.7438	0	0	0	0	0	0	0	0
siR175270	ATCTAGATGACTGCAACATAGACC	24	0	0	0	0	0	0	0	67.0071	0	0
siR175326	ATCTAGGAGGGCATTGGAGTGGAT	24	12.5624	0	0	0	0	0	26.0176	11.5376	0	0			13105.m04596_exon2-sense
siR175943	ATCTCAGGATTATTTACGATTGGC	24	9.75514	5.56502	1.40614	0	0	26.1391	24.3115	9.50905	8.69927	3.10974		13112.m00961_exon4-antisense
siR175948	ATCTCAGGGGACATGAATGGTATA	24	0	0	0	0	0	0	44.3578	0	0	0
siR176022	ATCTCATCTTTTGCTCTGTTGGCC	24	7.79007	4.21137	1.14249	0	0	28.2027	0	9.38226	10.4504	0		13112.m00961_exon1-antisense
siR176251	ATCTCCCGAGTCGTCGTGTTTTAC	24	3.78977	3.45934	0.96672	0	0	11.1779	14.6722	6.21258	4.0107	1.08479	LTR:0
siR176903	ATCTCTGGATATTTAGCATGTGGT	24	0	0	0	0	0	0	0	0	26.2108	0
siR177017	ATCTCTTGGGTCTGGACAGATGAG	24	0	0	0	0	0	0	0	0	21.8047	0
siR177068	ATCTGAAACAGCTCGGTAACTACA	24	0	0	0	0	0	66.7235	0	0	0	0						LOC_Os06g48550.1|13106.m05162|1000bp_UpstreamSeq|29375998..29377000
siR177106	ATCTGAACCTAGATTGTGTACTCA	24	0	0	0	0	0	0	0	23.5191	0	0
siR177111	ATCTGAACTCTCTAAGCATCCTAT	24	6.17591	5.0386	0	0	0	27.8588	17.0607	25.2941	7.96492	6.50877
siR177159	ATCTGAATTCTGAGTACAAGAGGA	24	8.98315	4.88819	1.0546	0.343418	0	14.6173	22.5201	22.5682	7.51301	3.47134
siR177223	ATCTGACCCCGAAGACTTGTTACC	24	2.9476	2.4817	2.02132	0.858545	0.469114	0.171968	2.98562	10.6501	7.34354	2.82047	DNA:0
siR177261	ATCTGACGTGGTTTGATGTTTGTG	24	3.36868	2.03048	0.439418	0	0	10.834	12.4543	6.08579	3.67177	1.37407
siR177334	ATCTGATCAGGCGTAAGGATCCGC	24	23.9317	0	0	0	0	0	0	0	0	0
siR177436	ATCTGCAAGAAGATGTGCTCTGTA	24	0	0	0	0	0	0	0	10.2064	0	0
siR177466	ATCTGCACAGAAGAAAATAGAACA	24	0	0	0	0	0	0	0	72.9661	0	0		13111.m00819_exon4-antisense		13111.m00819_intr3-antisense
siR177684	ATCTGGAACAGCTCGGTAACTTCA	24	0	0	0	0	0	14.2733	0	9.19208	0	0
siR177685	ATCTGGAACTAGAAGAGTGTGCTT	24	0	0	0	0	0	0	20.3875	0	0	0
siR177693	ATCTGGAATGAAGGGAGAAGAGGT	24	0	0	0	0	0	11.7798	0	0	0.338933	0
siR177701	ATCTGGACAGAAGAAGAGGACAGG	24	13.4747	0	0	0	0	0	0	0	0	0			13107.m01247_exon3-sense
siR177703	ATCTGGACAGAGGAAGAGGACAGG	24	6.9479	0	0	0	0	0	13.6486	0	0	0			13107.m01465_exon3-sense
siR178261	ATCTGTTGTCGTTGGAGAAGATGC	24	0	3.98576	0	0	0	23.8175	19.2786	15.9752	0	0	LTR/Gypsy:0	13106.m03500_exon1-antisense
siR178497	ATCTTATAGGGACACTTGGGCTAA	24	6.03555	0	0	0	0	12.2097	16.8048	5.83222	2.48551	0			13112.m00961_exon7-sense
siR178923	ATCTTCGTAAACTAGTTGGGCATA	24	12.0009	6.99387	3.779	1.97465	0	0	0	7.41706	16.8901	1.66335						LOC_Os09g02580.1|13109.m00178|1000bp_UpstreamSeq|1075317..1074315
siR179333	ATCTTGGTTCTGGAAGAAGAAGGC	24	11.65	5.1138	3.42746	0	0	55.7176	39.7514	45.897	10.9588	7.52124			13105.m00371_exon1-sense
siR179950	ATCTTTTCGATTTGTTCGTCGTTG	24	0	1.05284	0	0	0	7.4806	13.5633	3.74023	3.55879	0
siR179957	ATCTTTTCTTGCATCGTTGGTACA	24	0	0	0	3.17662	2.34557	0	0	17.3699	0	0
siR179966	ATCTTTTGCTCTGTTGGCCATGAT	24	9.5446	8.27232	2.54862	0	0	37.317	35.3157	17.7502	12.9924	3.90526		13112.m00961_exon1-antisense
siR180031	ATGAAAAGAAGCCTCGCTGGATTG	24	2.38615	0	0	0	0	9.02831	10.1511	4.31077	2.20306	0				13107.m00837_intr4-antisense
siR180139	ATGAAATGCAGCTGCGACTTTGGT	24	8.56206	0	0	0	0	0	0	8.87512	14.0657	0
siR180186	ATGAACACTTCCCTCATATCGTCT	24	0	0	0	0	0	0	10.0658	9.12869	5.93132	0						LOC_Os04g08500.1|13104.m00770|1000bp_UpstreamSeq|4585910..4586912
siR180277	ATGAACGATGAGGAGAACTTAGGA	24	6.597	0	0	0	0	16.079	17.0607	0	0	0
siR180341	ATGAACTGGTTCAAGGAGATCTGC	24	0	0	0	0	0	0	0	27.3227	0	0						LOC_Os11g40780.1|13111.m04045|1000bp_UpstreamSeq|23925288..23924286
siR180368	ATGAAGACAAAGCGGTGCCTCACT	24	0	0	0	0	0	18.5725	0	7.86082	0	0					13106.m02474_intr2-sense
siR180407	ATGAAGATGGCTCCTGGAATATAC	24	3.85995	0	0	0.686836	0	1.03181	0	10.2698	0	0	LINE/L1:1		13108.m01378_exon3-sense
siR180464	ATGAAGCTTGCAGTTCTGATTCAT	24	0	0	0	0	0	0	0	13.4395	0	0
siR180490	ATGAAGGTTGTTTGGGGAGATTGG	24	0	0	0	0	0	0	34.4626	0	0	0	DNA/MuDR:1				13106.m02114_intr1-sense
siR180529	ATGAATAAGATGGACGACAAGTTA	24	0	0	0	0	0	13.1555	0	0	2.93742	0						LOC_Os12g40000.1|13112.m04157|1000bp_UpstreamSeq|24697598..24696596
siR180650	ATGAATCTTAAATCAGTTGGATGG	24	3.22832	0	0.439418	0	0	15.0472	17.7431	7.73403	3.33284	0
siR181064	ATGACCAGATAGACAAACATGCAT	24	0	0	0	0	0	0	11.3454	0	0	0
siR181191	ATGACGAATGTAGTAGAAGTAACG	24	0	0	0	0	0	0	18.4256	0	0	0
siR181192	ATGACGAATTAGCACCAGACAACG	24	6.597	1.80487	0	0	0	58.813	46.7463	22.6949	5.47941	1.51871
siR181335	ATGACGGAGGTAGCAGACTGGTTG	24	0	0	0	0	0	0	0	38.7335	0	0		13102.m01414_exon7-antisense
siR181359	ATGACGGTAAGTGGGGATGTGTAC	24	14.6678	0	0	0	0	0	36.254	18.0672	11.8062	1.88031					13106.m05162_intr2-sense
siR181369	ATGACGGTTGTAATTGCGGTAACT	24	0	0	0	0	0	0	11.1748	0	0	0
siR181512	ATGACTGCTTTACGGGACGGAGTG	24	43.7928	24.2906	10.4582	2.23222	0	70.0769	85.4741	43.4247	47.507	10.2694
siR181670	ATGAGACGTAGATGTGTACATAGT	24	0	0	0	0	0	0	20.5582	0	0	0							LOC_Os01g16060.1|13101.m01782|3-UTR
siR181709	ATGAGATAGCTTTTTTGGTCGTGG	24	14.1765	6.09144	0	0	0	31.4701	64.5748	10.0162	13.6703	4.55614						LOC_Os05g43600.1|13105.m04596|1000bp_UpstreamSeq|25291743..25292745
siR181722	ATGAGATGACCAGGAGACTTGAAT	24	0	0	0	0	1.78263	0	2.3032	12.4252	0	0			13111.m00819_exon8-sense
siR181745	ATGAGATGTATGCGGTTGGATGGT	24	7.79007	1.80487	0	0	0	49.2688	36.6805	19.0815	2.59848	0.506237			13112.m00961_exon1-sense
siR181754	ATGAGCAAAAGATCCTGTAATTAT	24	3.78977	3.08332	0	0	0	11.7798	15.184	9.38226	6.10079	0						LOC_Os03g46240.1|13103.m04974|1000bp_UpstreamSeq|26141101..26142103
siR181762	ATGAGCAATAGGAGCAGGAGCTGA	24	0	0	0	0	0	0	0	12.0448	3.61528	0
siR181794	ATGAGCAGTAAGTCAGGAACACAA	24	5.89519	0	0	0	0	0	18.6815	18.7011	4.97101	0
siR181890	ATGAGCTGCAAGTTTGAAATGATG	24	23.5808	14.8902	0	0	0	69.217	0	37.1487	27.849	0			13105.m04595_exon3-sense
siR181910	ATGAGGAAAGCTACGAATCGGACG	24	0	0	0	0	0	0	71.9109	33.979	0	0
siR181991	ATGAGGTGCCAGTAGAGGATTTGG	24	12.2816	4.96339	0	0	0	0	0	0	14.5176	0		13110.m00412_exon1-antisense				LOC_Os10g04940.1|13110.m00411|1000bp_UpstreamSeq|2412403..2411401
siR182126	ATGAGTGGGATGAATGATATGTAG	24	0	4.81299	0	0	0	19.8623	15.184	7.0367	0	2.02495
siR182148	ATGAGTTCCTAGCATGCAAGCTCT	24	4.91266	2.6321	0	0	0	9.88815	11.4307	6.71973	3.05039	1.30175					13106.m02474_intr2-sense
siR182211	ATGATAATCAGGAAGGTGGCAATG	24	0	0.150406	0	0	0	0	10.1511	0	0	0
siR182702	ATGATTAATATGTGACGATGGATA	24	0	13.1605	0	0	0	0	0	0	0	0
siR182748	ATGATTCTGTAGGCGGTACTTTTG	24	0	0	0	0	0	0	6.31246	10.0796	6.72216	0			13101.m01409_exon8-sense		13101.m01409_intr7-sense
siR182839	ATGATTTGTATGAGTGAAGATTGA	24	21.2648	15.2662	0	0	0	0	14.5869	24.0262	26.2108	11.3542
siR183107	ATGCAATGGTGAGTAGAGAGCGTC	24	0	0	0	0	0	35.9413	30.624	16.5458	0	0
siR183230	ATGCACCCTTAAGATTTCTAACGA	24	0	0	0	0	0	10.834	0	0	0	0			13106.m02474_exon3-sense		13106.m02474_intr2-sense
siR183350	ATGCAGAACAGGGAACAGTAATGA	24	0	0.150406	0	0	0	12.1237	10.2364	0	0.338933	0.216959
siR183355	ATGCAGAAGTTGTGAAAAGTGGAG	24	0	9.40037	0	0	0	71.2806	0	55.2159	0	7.015
siR183600	ATGCATAGTTTGACGGTTGAGTGA	24	10.4569	0	0	0	0	19.0884	0	0	10.3939	0
siR184053	ATGCCATGGAACCGTACGAAGACG	24	3.50904	0	0	0	0	19.0024	10.2364	12.4252	3.10688	0	LTR/Copia:1		13108.m03502_exon1-sense
siR184481	ATGCCTTGTAAAGATCGTCATCTG	24	10.5271	0	4.3063	0	0	0	0	0	0	0						LOC_Os10g04950.1|13110.m00412|1000bp_UpstreamSeq|2413300..2412298
siR184569	ATGCGAGAGAGAAGACTAGTAGAA	24	0	0	0	0	0	0	31.2211	25.9914	0	0
siR184608	ATGCGATGGCGATGTAGGAGAAGA	24	0	0	0	0	0	0	0	13.7564	0	0
siR184798	ATGCGTCAATATGAGGAAAGCTAC	24	0	0	0	0	0.281468	19.2604	20.1316	8.11439	12.6535	0
siR184839	ATGCGTGAGAAACTGAAGTGGTGA	24	0	0	0	0	0	0	33.6096	0	0	0
siR184946	ATGCTACAGGACGAGAACAGGTAA	24	0	0	0	0	0	317.796	211.212	185.046	0	0
siR185366	ATGCTGAACGAGATGGGGACGTGG	24	0	0	0	0	0	24.1615	24.9939	0	0	0		13102.m03554_exon2-antisense				LOC_Os02g32780.1|13102.m03553|1000bp_UpstreamSeq|19464461..19463459
siR185461	ATGCTGCTGAATGAGAAGATGGAT	24	48.495	25.4186	0	0	0	264.142	207.714	207.614	71.3453	29.7957
siR185838	ATGGAACAAGCGCAGTACGGGCCA	24	0	0	0	0	0	0	18.6815	0	0	0						LOC_Os11g28370.1|13111.m02728|1000bp_UpstreamSeq|15869584..15870586
siR185845	ATGGAACAGCTCGGTAACTACATG	24	7.15845	1.72967	0	0	0	29.6644	30.5387	12.4252	0	0.433918
siR185847	ATGGAACCAAGCAATGATTGATTA	24	0	0	0	0	0	0	27.9796	0	0	0
siR185858	ATGGAACGACAGTGAGGAGAGGCC	24	8.91297	0	0	0	0	17.7127	13.6486	0	0	0
siR185891	ATGGAAGCAAGCATACTCTGAAGA	24	1.68434	0	0	0	0	10.834	13.478	8.68493	1.35573	0						LOC_Os11g28370.1|13111.m02728|1000bp_UpstreamSeq|15869584..15870586
siR185976	ATGGAATTTAAGCAGGGTAGAATT	24	0	0	0	0	0	0	0	19.5886	0	0
siR186007	ATGGACACTTCTGTCAGGAGAACC	24	0	0	0	0	0	0	0	0	36.3788	0			13111.m00819_exon1-sense
siR186026	ATGGACATGTTCAGCATTGGAAGG	24	0	0	0	0	0	18.3146	0	6.40276	0	0				13112.m00961_intr1-antisense
siR186137	ATGGACGGCCTAGATGAATCTAAT	24	9.68496	6.46745	2.54862	0.429272	0.938228	0	0.341214	1.20448	12.9924	1.01247						LOC_Os07g36310.1|13107.m03732|1000bp_UpstreamSeq|21716619..21717621
siR186152	ATGGACGTCGATTGTGATGACGGG	24	0	0	0	0	0	10.834	0	0	0	0
siR186266	ATGGAGCTCGAGCAAGAATGTGGT	24	0	0	0	0	0	0	94.431	95.4709	0	0
siR186362	ATGGATAAACAGTCGATTTGGGCG	24	8.84279	0	0	0	0	0	12.0278	3.61344	0	0	LTR:1
siR186386	ATGGATAGTCTAACTGCATGGTGA	24	9.33405	4.58738	1.58191	0	0	30.8682	31.7329	12.4886	9.49011	3.03742		13105.m04596_exon2-antisense
siR186592	ATGGCAAGTTAAGATGCGGGCTGT	24	0	0	0	0	0	11.7798	0	0	0	0	LTR/Copia:1		13111.m02728_exon1-sense
siR186633	ATGGCACGAGCACGATCTTTCGCA	24	10.4569	6.84347	2.98804	0	0	20.3782	22.3495	6.08579	15.3649	0
siR186665	ATGGCAGAGCGACGAGACTAAGAA	24	32.8446	0	0	0	0	132.845	103.814	121.969	0	0					13112.m04157_intr1-sense
siR186669	ATGGCAGATTCTCGGTAAGAAGTG	24	4.14067	1.80487	0	0	0	1.46173	0	10.3966	0	2.89279	LINE/L1:1		13108.m01378_exon3-sense
siR186773	ATGGCCAACAGAGCAAAAGATGAG	24	7.43917	2.4817	1.23037	0	0	19.7763	18.5962	21.5539	5.93132	4.19454			13112.m00961_exon1-sense
siR187118	ATGGCTCCGTGCTTGATTGTTGGT	24	11.0886	0	0	0	0	41.2723	39.6661	19.8422	19.7146	4.62846
siR187175	ATGGCTGGAGGCGCGTTATGCATG	24	0	0	0	0	0	0	20.2169	0	0	0
siR187339	ATGGGATTGCTATGATTGCCTGGT	24	9.05333	1.57926	0	0	0	0	24.3968	9.50905	2.88093	0.216959
siR187483	ATGGGCTGGGATGGTAGATCAATT	24	0	0	0	0	0	0	10.9189	0	0	0
siR187495	ATGGGGAATGACGACTAAGACCAC	24	0	0	0	0	0	11.3499	0	0	0	0
siR187723	ATGGTAATTGTATTGATCTGTGGA	24	0	8.12192	0	0	0	32.158	38.9837	0	0	0	LTR:0					LOC_Os01g20170.1|13101.m02191|1000bp_UpstreamSeq|11470443..11471445
siR187785	ATGGTAGACGCTGAAGAACATGGC	24	30.3181	9.47557	0	0	0	113.757	86.7537	0	13.7833	0
siR187815	ATGGTAGGTAGACGCGTGGTTTCT	24	1.75452	0	0	0	0	11.5218	9.89521	5.76882	0	0.795516
siR188146	ATGGTCTTCATGTTCTTTGGTTAT	24	9.61478	11.0548	3.07593	2.66149	1.87646	0	4.35048	10.8403	21.5787	6.58109
siR188224	ATGGTGCACACCTCGGTCGTGGGA	24	0	0	0	0	0	19.0024	21.8377	0	0	0						LOC_Os08g33600.1|13108.m03502|1000bp_UpstreamSeq|20978983..20979985
siR188246	ATGGTGCCGGTACTAGTTTGATGG	24	3.50904	0.451218	0	0	0	7.56658	12.8808	5.32507	1.63817	0.361598
siR188487	ATGGTTTCCCTTTGTCAGACCTCC	24	0	0	0	0	0	0	12.1984	6.84652	0	0			13102.m02562_exon3-sense		13102.m02562_intr2-sense
siR188562	ATGTAACAAAGATAGCAGGACGTG	24	66.3911	19.9288	0	0	0	313.497	243.115	231.767	39.7116	22.7084
siR188703	ATGTACCACTGACTGCAGAAGAGA	24	0	0	2.28497	0	0	0	9.89521	29.9218	17.9634	10.1247				13109.m01055_intr1-antisense
siR188826	ATGTAGACGACGATACTCTCATGC	24	7.29881	2.10568	0.703069	0	0	0	5.03291	10.9037	2.88093	1.37407			13101.m07603_exon4-sense
siR188839	ATGTAGAGATGGTGAAGCAAAGGC	24	11.4395	0	0	0	0	0	0	0	0	0			13107.m05009_exon1-sense
siR188885	ATGTAGATTTGAAAAGAGAAATGG	24	0	0	0	0	0	0	0	55.7864	0	0						LOC_Os12g09060.1|13112.m00961|1000bp_UpstreamSeq|4735236..4734234
siR189154	ATGTATGCGGTTGGATGGTGTCAT	24	0	1.35365	0	0	0	12.4677	10.0658	8.11439	3.84124	1.22943			13112.m00961_exon1-sense
siR189395	ATGTCAGGGAAGGGGTAAGATTGC	24	0	0	0	0	0	34.7375	19.7051	0	0	0				13108.m02607_intr4-antisense
siR189596	ATGTCCCTCTGAACCCTGCTTGAC	24	0	0	0	0	3.00233	0	0	58.7659	0	0		13106.m01303_exon2-antisense
siR189994	ATGTCTCGTACTGTTATGTGCATC	24	25.3353	0	0	0	0	0	0	0	0	0						LOC_Os01g16060.1|13101.m01782|1000bp_UpstreamSeq|9042203..9041201
siR190414	ATGTGCAAGAGGGGAATGAACGTG	24	0	0	0	0	0	18.0566	14.5869	0	1.58169	0
siR190615	ATGTGGAAGGAACCAGAAGCTGAT	24	12.422	0	0	0	0	0	0	0	0	0
siR190793	ATGTGTAGAACAGAGAACAGGAAG	24	0	0	0	0	0	0	0	20.6029	0	0				13101.m04239_intr2-antisense
siR190966	ATGTGTGGTTCAAGGCGATGTCGG	24	0	0	0	0	0	10.49	0	0	0	0		13105.m04596_exon2-antisense
siR191233	ATGTTCGACAACTATGATGAGGAC	24	14.1765	0	0	0	0	0	0	0	0	0						LOC_Os07g36310.1|13107.m03732|1000bp_UpstreamSeq|21716619..21717621
siR191315	ATGTTCTTCGATCGTAGGATGGCG	24	18.8786	7.44509	3.51534	0	0	20.1202	24.3968	8.93851	15.4779	1.73567						LOC_Os08g33600.1|13108.m03502|1000bp_UpstreamSeq|20978983..20979985
siR191597	ATGTTTCAAATATTTGTCGGGTGC	24	0	0	0	0	0	11.6938	0	0	0	0						LOC_Os06g23010.1|13106.m02474|1000bp_UpstreamSeq|13426643..13427645
siR192009	ATTAACAAGACCGCAACAACCTAT	24	7.22863	4.51218	0	0	0	32.072	17.146	20.3494	7.28705	0					13108.m02607_intr7-sense
siR192117	ATTAAGAAGGGACATGTAGTCGGA	24	0	0	0	0	0	0	58.8594	0	0	0
siR192134	ATTAAGAGGTATGCAACGTCGATG	24	4.07049	1.88007	0.351534	0	0	16.3369	16.8048	8.17778	2.48551	0.723196	LTR/Copia?:1
siR192274	ATTAATATGTGACGATGGATACAA	24	5.19338	3.08332	0.703069	0	0	15.2191	13.5633	9.57245	4.74506	2.09727
siR192315	ATTAATCGATCTGTTCTGGCTTCC	24	6.31628	3.53454	0	0	0	13.2415	11.6866	7.73403	6.15728	0
siR192478	ATTACAAGGTCGACTGCATCCCAA	24	0	0	0	0	0	61.3925	0	0	0	0				13101.m02191_intr2-antisense
siR192568	ATTACAGGACATGCAACAAGTAAG	24	14.2467	0	0	0	0	0	50.4144	33.9156	21.3528	0
siR192757	ATTACCTGAGCACTACAGGACGTG	24	0	0	0	0	0	11.4359	0	0	0	0					13106.m02474_intr2-sense
siR192934	ATTACTCCTTTCAGTGATCCGGTA	24	2.9476	2.18089	0.527302	0	0	8.94232	10.1511	5.07149	3.38933	1.30175
siR193026	ATTAGAACATGAGTAATAAGCAGA	24	0	0	0	0	0	0	0	42.0934	0	0				13112.m00961_intr3-antisense
siR193056	ATTAGAATTGAGAACGGTTGCTTA	24	0	0	0	0	0	0	0	10.5234	0	0
siR193122	ATTAGAGATTTAGAGTAAACCGGT	24	0	0	0	0	0	0	52.547	30.112	19.6581	0				13108.m02607_intr4-antisense
siR193238	ATTAGCACGGGCACAATAATGTTT	24	0	0	0	0	0	21.41	14.7575	9.31887	0	0						LOC_Os06g19790.1|13106.m02114|1000bp_UpstreamSeq|11301571..11302573
siR193251	ATTAGCAGTAGACACGAATTATCA	24	0	0	0	0	0	0	0	11.2207	1.69466	2.09727
siR193369	ATTAGCTTGGTCTATCGGAAATAA	24	7.79007	0	0	0	0	10.748	0	8.55815	9.15118	0
siR193581	ATTAGTGACAAGTGTAGGCCGACA	24	18.1067	0	0	0	0	60.7906	56.8975	43.805	10.6199	0
siR193855	ATTATCATTGAACACTTGTCGGAG	24	0	0	0	0	0	24.8493	0	0	0	0
siR194462	ATTCAATTATTGTAGATGATGGCA	24	0	0	0	0	0	0	0	88.1172	0	0
siR194576	ATTCACGACATAGCCAGTAGAGCA	24	16.5627	0	0	0	0	26.3971	35.9128	21.4271	14.0657	4.91773	LTR/Gypsy:0
siR194754	ATTCAGGGCAGCGCTAAGAGATGT	24	0	6.39225	0	0	0	0	8.53035	17.2431	0	0		13103.m07097_exon9-antisense
siR195068	ATTCATTGAATGAACCTGGTGTAT	24	0	0	0	0	0	0	3.66805	7.67064	12.3146	0				13111.m00819_intr8-antisense
siR195476	ATTCCGACTCATACATCTAATGCA	24	8.21116	5.48982	2.81228	0	1.2197	0	0	10.3966	13.6703	6.87037
siR195714	ATTCCTCGGTCAGCAGCAGCAGCA	24	3.78977	0	0	0	0	17.1108	0	10.9671	0	0				13112.m04157_intr1-antisense
siR196101	ATTCGGATGGCACTTCAAGTGGAG	24	28.1425	8.87395	0	0	0	98.4515	0	57.6249	0	0
siR196153	ATTCGGTGGAGCTAGCGGTTGTTT	24	0	0	0	0	0	0	12.0278	0	0	0
siR196349	ATTCTAACAGGGGCAAACAAACTA	24	0	0	0	0	0	24.3334	18.255	0	0	0
siR196417	ATTCTACTAGGAAACTGCGAGACG	24	0	0	0	0	0	28.2027	0	0	0	0	DNA/Tourist:1
siR196777	ATTCTCTCGATGGTATGTGGGTCA	24	0	0	0	0	0	0	0	11.9814	0	0
siR196791	ATTCTCTGAAGCCTTACTACTTAT	24	2.73705	3.91055	0	0	0	10.748	8.95687	9.0019	0	0
siR197041	ATTCTGTCTACTGGAGTTCAGGTT	24	5.82501	0	1.93344	0	0	0	9.7246	15.4681	11.0718	0			13102.m01414_exon6-sense
siR198169	ATTGCACTTGCAGGGCATGTAGCA	24	0	0	0	0	0	0	17.3166	0	4.18017	0
siR198183	ATTGCAGAGGACAGAAACGCAGAT	24	0	0	0	0	0	0	0	91.4771	0	0			13111.m00819_exon8-sense		13111.m00819_intr7-sense
siR198216	ATTGCAGGATGAATTGGATTGAAC	24	0	0	0	0	0	0	0	18.0038	0	0
siR198221	ATTGCAGGTGTTATGAACGACGTA	24	0	0	0	0	0	0	10.5776	0	0	0	LTR/Copia:0					LOC_Os10g19020.1|13110.m01574|1000bp_UpstreamSeq|9617748..9616746
siR198224	ATTGCAGTAGCTGAGTGTAGATAG	24	10.2464	0	0	0	0	15.821	20.0463	12.9323	0	0
siR198591	ATTGCGGAACCGATGATGCGACGG	24	0	0	0	0	0	0	0	0	14.4611	0		13111.m00819_exon7-antisense
siR198639	ATTGCGTGTACGATTGATCTTGAG	24	7.29881	3.00812	1.14249	0.600981	0	11.6938	13.3074	6.71973	6.38323	1.51871
siR198880	ATTGGAACTCTGCCGGCAGCCCTG	24	0	0	0	0	0	12.8976	0	0	0	0				13109.m00561_intr10-antisense
siR198885	ATTGGAACTTGGCAGCATATGGAG	24	12.0009	0	0	0	0	0	0	0	0	0					13110.m02650_intr1-sense
siR198918	ATTGGACATCTGGGTGAGAGGTAA	24	0	0.676827	0	0	0	10.0601	0	2.21878	1.18626	0					13105.m04595_intr2-sense
siR198955	ATTGGAGATGACGAGACAGATGAA	24	0	0	0.703069	0	0	14.0154	15.184	9.76263	0	0.578557			13112.m00961_exon7-sense
siR199035	ATTGGATTGAACTTGAAAGTAGAA	24	0	0	0	0	0	0	47.5994	0	0	0
siR199042	ATTGGATTGTGGCAGACAAGAGAA	24	0	0	0	0	0	0	0	31.6334	0	0				13107.m00837_intr4-antisense
siR199265	ATTGGTAAAGTAGCATCTAGGTAT	24	26.5284	0	0	4.29272	0	0	36.6805	78.2912	21.5787	0
siR199315	ATTGGTCAAGCAGGGTTCAGAGGG	24	5.54429	1.20325	0.615185	0.343418	0.844405	0	1.96198	13.0591	4.57559	4.55614			13106.m01303_exon2-sense
siR199448	ATTGGTTGTTCGTGAGCGTCGTCA	24	5.19338	0	0	0	0	10.3181	13.7339	4.37416	3.89772	0.795516
siR199488	ATTGTAAGCAGAGCGAATTAATGT	24	4.98284	4.51218	1.0546	0	0	18.3146	13.3074	12.8689	5.98781	1.95263			13102.m03554_exon2-sense		13102.m03554_intr2-sense	LOC_Os02g32780.1|13102.m03553|1000bp_UpstreamSeq|19464461..19463459
siR199569	ATTGTAGAGGCATAGAGGCAGTTT	24	0	0	0	0	0	0	0	0	10.055	0						LOC_Os09g24310.1|13109.m02307|1000bp_UpstreamSeq|14443601..14444603
siR199664	ATTGTATGAGTGGACTATCGGTTT	24	10.4569	7.89631	0	0	0	0	0	14.2636	20.8444	6.65341
siR199792	ATTGTCCATCAAGAAAGCAGACGC	24	0	0	0	0	0	27.6868	0	0	0	0					13101.m02191_intr1-sense
siR199936	ATTGTCTCTGTTAATCATCCGCAT	24	5.33374	0	0	0	0	29.7504	0	0	0	0
siR199952	ATTGTCTGTATGAGTTGGTTGCAT	24	0	0	0	0	0	0	1.53546	0	17.1726	0				13109.m03271_intr1-antisense
siR200364	ATTGTTTGTCCGATGGTCTGATGG	24	0	16.6199	0	0	7.03671	0	0	0	55.3025	0
siR200445	ATTTAACGACGCGGAATGAACGGA	24	31.5814	11.2804	4.39418	0	0	72.9143	79.4176	88.8779	25.7024	19.5986	DNA/MuDR:0
siR200474	ATTTAAGGAAACTAGCACGTGCAA	24	0	0	0	0	0	0	11.1748	0	0	0
siR200690	ATTTAGAACCGACGCCATAGATAA	24	12.5624	0	0	0	0	0	0	0	14.3481	0					13109.m01055_intr1-sense
siR201171	ATTTCATGAAGACAAAGCGGTGCC	24	0	0	0	0	0	12.5536	0	0	0	0					13106.m02474_intr2-sense
siR201199	ATTTCATTGGAACTTGGCAGCATA	24	0	13.5365	0	0	0	0	0	26.4352	11.6932	0					13110.m02650_intr1-sense
siR201476	ATTTCGCGAGAGGTGTGAGTTGTA	24	0	0	0	0	0	28.8906	0	0	0	0
siR201911	ATTTGACTGATGTTGAGGACAAGA	24	0	3.91055	0	0	0	0	21.3259	10.0796	8.86874	2.24191				13101.m02191_intr1-antisense
siR202383	ATTTGGGAATCGTTGCACAAATGG	24	6.597	2.78251	0	0	0	8.5124	12.0278	3.80362	0	1.59103						LOC_Os12g40000.1|13112.m04157|1000bp_UpstreamSeq|24697598..24696596
siR202799	ATTTTAATGTAAGACGTCGTTGAC	24	4.14067	2.78251	0	0	0	14.0154	20.2169	11.5376	6.49621	2.31423
siR203137	ATTTTCGGACTTACATGTGGTATT	24	98.6041	0	0	0	0	0	53.5706	19.969	0	6.21949
siR203467	ATTTTGTCGAACAACCACGAGGGC	24	0	0	0	0	0	11.8658	0	0	0	1.22943
siR203635	ATTTTTCTAAATGGCTGAATCGAC	24	11.2289	0	0	0	0	0	0	19.5253	0	0
siR203668	ATTTTTGATGTAGAGGCCGGTTTA	24	4.07049	0	0	0	0	12.9836	8.70096	10.143	0	0					13111.m04455_intr6-sense
[truncated: 2,217 more rows]
