# Supplementary material for: Genome-Wide Analysis of 24-nt siRNAs Dynamic Variations during Rice Superior and Inferior Grain Filling
Source: PLoS One. 2013 Apr 12;8(4):e61029. doi: 10.1371/journal.pone.0061029 (PMC3625182; doi:10.1371/journal.pone.0061029)
Supplement: Table S3 — Expression level of key enzymes involved in producing 24 nt-siRNAs detected by digital gene expression profiling. (XLS) [file pone.0061029.s007.xls]

## Sheet: Sheet1
Table S3, Expression level of key enzymes involved in producing 24nt-siRNAs detected by digital gene expression profiling
Locus_ID	putative function	S10DAF_gene_TPM	S15DAF_gene_TPM	S21DAF_gene_TPM	S27DAF_gene_TPM	S35DAF_gene_TPM	I10DAF_gene_TPM	I15DAF_gene_TPM	I21DAF_gene_TPM	I27DAF_gene_TPM	I35DAF_gene_TPM
LOC_Os04g48370.1	RNA polymerase IV subunit, putative, expressed	1.46	0.85	1.48	0	1.87	19.6	10.63	4.56	2.77	2.19
LOC_Os09g38268.1	RNA polymerase IV largest subunit, putative, expressed	0	0.34	0.89	0.99	3.11	4.47	3.72	1.82	1.54	0.94
LOC_Os01g73430.1	RNA polymerase IV largest subunit, putative	0	0	0	0	0.62	0	0	0	0	0
LOC_Os04g39160.1	RNA-dependent RNA polymerase, putative, expressed	13.54	8.14	9.77	3.65	17.75	58.36	38.27	33.44	16.02	16.28
LOC_Os01g68120.1	DCL3a, putative, expressed	13.12	8.82	8.59	1.66	14.64	52.19	17.54	16.41	20.64	10.64
LOC_Os10g34430.1	DCL3b, putative, expressed	1.87	1.02	0	0	1.56	6.39	3.37	2.43	2.16	0
