# Supplementary material for: Genome-Wide Analysis of 24-nt siRNAs Dynamic Variations during Rice Superior and Inferior Grain Filling
Source: PLoS One. 2013 Apr 12;8(4):e61029. doi: 10.1371/journal.pone.0061029 (PMC3625182; doi:10.1371/journal.pone.0061029)
Supplement: Table S4 — Number of predicted target genes in known rice pathways revealed by KEGG analysis. Statistic was performed using pair-wise T test between each period of superior and inferior grains. (XLS) [file pone.0061029.s008.xls]

## Sheet: make_KEGG_count_table
Table S4, Number of predicted target genes in known rice pathways revealed by KEGG analysis. Statistic was performed using pair-wise T test between each period of superior and inferior grains.
Pathway code	Pathway name	S10DAF	S15DAF	S21DAF	S27DAF	S35DAF	I10DAF	I15DAF	I21DAF	I27DAF	I35DAF	p value of pair-wise T test
ko00562	Inositol phosphate metabolism	97	33	7	4	4	188	156	128	76	50	0.0191553
ko00280	Valine, leucine and isoleucine degradation	91	30	7	4	4	180	149	128	74	50	0.0157818
ko00640	Propanoate metabolism	91	30	7	4	4	174	144	123	72	48	0.017541
ko00230	Purine metabolism	30	11	2	0	2	111	90	58	38	8	0.0262662
ko00500	Starch and sucrose metabolism	23	12	0	1	0	99	78	53	24	5	0.0361336
ko04120	Ubiquitin mediated proteolysis	17	6	2	1	1	99	72	40	25	6	0.0345491
ko03050	Proteasome	13	22	0	0	1	59	61	13	12	3	0.130645
ko00240	Pyrimidine metabolism	15	3	2	0	1	43	32	19	23	4	0.0222813
ko00051	Fructose and mannose metabolism	13	3	2	0	0	41	50	33	13	5	0.0225443
ko00190	Oxidative phosphorylation	14	4	1	1	1	38	37	26	19	5	0.0137754
ko00360	Phenylalanine metabolism	7	5	0	1	0	37	30	13	9	4	0.0393493
ko00940	Phenylpropanoid biosynthesis	7	3	0	0	0	33	33	16	8	1	0.0404929
ko03010	Ribosome	13	2	0	0	0	33	25	15	6	3	0.0624437
ko00710	Carbon fixation in photosynthetic organisms	9	3	0	0	0	29	23	15	11	2	0.0263814
ko03420	Nucleotide excision repair	6	3	0	0	0	29	22	12	11	2	0.0242482
ko00010	Glycolysis / Gluconeogenesis	3	0	0	0	0	28	24	12	10	2	0.0159584
ko00520	Amino sugar and nucleotide sugar metabolism	3	2	0	0	0	28	23	14	6	2	0.0252823
ko00903	Limonene and pinene degradation	5	4	0	1	0	28	22	13	8	3	0.0254907
ko04070	Phosphatidylinositol signaling system	8	3	0	0	0	28	32	13	12	2	0.0294388
ko00040	Pentose and glucuronate interconversions	8	4	0	0	0	26	20	12	7	1	0.0523288
ko00480	Glutathione metabolism	12	2	2	1	0	26	24	18	10	4	0.0245197
ko00620	Pyruvate metabolism	6	1	0	0	0	25	23	16	10	3	0.0108913
ko00030	Pentose phosphate pathway	4	2	0	0	0	24	13	8	10	1	0.0315621
ko03020	RNA polymerase	4	0	0	0	0	24	20	7	7	0	0.044981
ko00330	Arginine and proline metabolism	2	2	0	0	0	23	18	17	5	2	0.0170769
ko03030	DNA replication	11	3	0	0	0	23	18	14	13	2	0.0252289
ko00350	Tyrosine metabolism	11	11	1	1	1	22	22	15	16	10	0.00712907
ko00450	Selenocompound metabolism	10	8	1	0	1	19	21	14	15	6	0.0105932
ko00460	Cyanoamino acid metabolism	2	2	0	0	0	18	20	9	1	1	0.0580543
ko04144	Endocytosis	10	3	3	0	0	18	20	18	11	3	0.0179228
ko00270	Cysteine and methionine metabolism	4	4	0	0	0	17	18	8	7	0	0.0432427
ko03440	Homologous recombination	6	3	0	0	0	17	15	8	7	1	0.0374277
ko00380	Tryptophan metabolism	3	1	0	1	0	16	14	9	4	2	0.0204173
ko00195	Photosynthesis	3	3	0	0	0	15	11	13	4	10	0.00154146
ko00561	Glycerolipid metabolism	7	1	0	0	0	15	12	7	6	0	0.0601573
ko00860	Porphyrin and chlorophyll metabolism	7	2	0	0	0	15	12	9	7	2	0.0241719
ko00945	Stilbenoid, diarylheptanoid and gingerol biosynthesis	2	0	0	0	0	15	14	7	3	0	0.0380828
ko00970	Aminoacyl-tRNA biosynthesis	4	0	0	0	0	15	12	4	5	1	0.0425096
ko00510	N-Glycan biosynthesis	1	2	0	0	0	14	8	6	3	1	0.034787
ko00564	Glycerophospholipid metabolism	9	2	0	0	0	14	16	9	7	2	0.0414242
ko02010	ABC transporters	7	4	2	1	2	14	9	5	8	4	0.0480801
ko04626	Plant-pathogen interaction	2	1	0	0	0	14	16	5	5	1	0.0312865
ko00052	Galactose metabolism	7	2	0	0	0	13	11	13	5	4	0.0145558
ko00053	Ascorbate and aldarate metabolism	6	3	0	0	0	13	12	12	6	0	0.038915
ko00071	Fatty acid metabolism	4	1	0	0	0	13	11	8	7	0	0.0202288
ko00290	Valine, leucine and isoleucine biosynthesis	3	0	0	0	0	13	7	4	6	2	0.0179385
ko00650	Butanoate metabolism	1	0	0	0	0	13	9	5	4	1	0.0182649
ko03410	Base excision repair	11	2	0	0	0	13	7	8	7	1	0.146855
ko04146	Peroxisome	4	1	0	0	0	13	9	4	7	0	0.0434079
ko00020	Citrate cycle (TCA cycle)	3	1	0	0	0	12	11	9	5	2	0.00746889
ko00910	Nitrogen metabolism	4	3	0	0	0	12	14	9	7	2	0.0112418
ko03430	Mismatch repair	4	2	0	0	0	12	14	6	9	3	0.00749579
ko00310	Lysine degradation	3	0	0	0	0	11	8	6	4	0	0.0284705
ko00340	Histidine metabolism	9	7	1	0	1	10	13	10	10	7	0.0146478
ko00061	Fatty acid biosynthesis	3	1	0	0	0	9	9	6	2	1	0.0330515
ko00100	Steroid biosynthesis	3	1	0	0	0	9	11	9	4	1	0.0149785
ko00250	Alanine, aspartate and glutamate metabolism	2	1	0	0	0	9	11	8	4	1	0.0117991
ko04130	SNARE interactions in vesicular transport	2	0	0	0	0	9	2	4	3	0	0.0736983
ko00590	Arachidonic acid metabolism	1	1	0	0	0	8	8	4	3	0	0.0270798
ko00592	alpha-Linolenic acid metabolism	3	0	0	0	0	8	5	4	2	1	0.0373472
ko00630	Glyoxylate and dicarboxylate metabolism	5	1	0	0	0	8	6	5	4	1	0.0442575
ko00960	Tropane, piperidine and pyridine alkaloid biosynthesis	3	0	0	0	0	8	9	4	3	1	0.0271659
ko01040	Biosynthesis of unsaturated fatty acids	1	1	0	0	0	8	10	6	2	0	0.0333495
ko00260	Glycine, serine and threonine metabolism	3	2	0	0	0	7	9	3	3	1	0.0545673
ko00563	Glycosylphosphatidylinositol(GPI)-anchor biosynthesis	3	2	1	1	1	7	6	2	2	2	0.100032
ko00770	Pantothenate and CoA biosynthesis	0	0	0	0	0	7	4	4	2	1	0.0081191
ko00790	Folate biosynthesis	2	0	0	0	0	7	4	3	3	0	0.035946
ko00900	Terpenoid backbone biosynthesis	5	1	0	0	0	7	6	4	4	1	0.053493
ko00920	Sulfur metabolism	1	1	0	0	0	7	9	4	3	0	0.0294493
ko03022	Basal transcription factors	2	0	0	0	0	7	9	2	2	1	0.0494873
ko04650	Natural killer cell mediated cytotoxicity	6	3	1	1	1	7	7	5	6	3	0.0318376
ko00600	Sphingolipid metabolism	1	2	0	0	0	6	6	4	3	0	0.0268863
ko00904	Diterpenoid biosynthesis	7	0	0	0	0	6	6	4	8	1	0.0851351
ko00941	Flavonoid biosynthesis	3	0	0	0	0	6	7	3	1	0	0.0970193
ko00430	Taurine and hypotaurine metabolism	2	0	0	0	0	5	1	3	2	0	0.0943498
ko00906	Carotenoid biosynthesis	1	0	0	0	0	5	4	2	1	0	0.0489956
ko00072	Synthesis and degradation of ketone bodies	0	0	0	0	0	4	4	1	1	0	0.0438246
ko00410	beta-Alanine metabolism	2	0	0	0	0	4	3	3	3	1	0.00527611
ko00565	Ether lipid metabolism	3	1	0	0	0	4	4	3	3	1	0.0250589
ko00591	Linoleic acid metabolism	0	0	0	0	0	4	1	2	1	0	0.0460249
ko00730	Thiamine metabolism	3	2	0	0	0	4	4	3	4	0	0.0805162
ko03018	RNA degradation	0	0	0	0	0	4	4	3	2	1	0.00135214
ko04140	Regulation of autophagy	2	0	0	0	0	4	4	0	1	2	0.0789763
ko04712	Circadian rhythm	2	0	0	0	0	4	2	0	0	0	0.397204
ko00300	Lysine biosynthesis	1	1	0	0	0	3	3	2	2	2	0.000417607
ko00531	Glycminoglycan degradation	0	0	0	0	0	3	1	0	0	0	0.207305
ko00740	Riboflavin metabolism	0	0	0	0	0	3	3	2	1	0	0.014958
ko00750	Vitamin B6 metabolism	0	0	0	0	0	3	3	0	0	0	0.141113
ko00760	Nicotinate and nicotinamide metabolism	3	1	0	0	0	3	3	2	3	2	0.0216099
ko00905	Brassinosteroid biosynthesis	0	1	0	0	0	3	1	0	1	1	0.095452
ko03040	Spliceosome	1	0	0	0	0	3	3	2	1	0	0.0318376
ko03060	Protein export	0	0	0	0	0	3	2	1	2	0	0.0138499
ko03450	Non-homologous end-joining	1	0	0	0	0	3	2	1	1	0	0.0598379
ko00130	Ubiquinone and other terpenoid-quinone biosynthesis	0	0	0	0	0	2	3	2	1	1	0.00133713
ko00232	Caffeine metabolism	0	0	0	0	0	2	1	1	0	0	0.0649694
ko00944	Flavone and flavonol biosynthesis	0	0	0	0	0	2	0	0	0	0	0.346594
ko00196	Photosynthesis	0	0	0	0	0	1	3	0	0	0	0.207305
ko00400	Phenylalanine, tyrosine and tryptophan biosynthesis	3	1	1	0	0	1	6	6	4	1	0.0709312
ko00511	Other glycan degradation	0	0	0	0	0	1	1	2	0	0	0.0649694
ko00603	Glycosphingolipid biosynthesis	0	0	0	0	0	1	1	0	0	0	0.141113
ko00660	C5-Branched dibasic acid metabolism	0	0	0	0	0	1	1	0	0	0	0.141113
ko00670	One carbon pool by folate	0	1	0	0	0	1	1	0	0	0	0.544737
ko00780	Biotin metabolism	0	0	0	0	0	1	2	2	0	0	0.0557665
ko00908	Zeatin biosynthesis	1	1	0	0	0	1	3	1	2	1	0.0337304
ko00950	Isoquinoline alkaloid biosynthesis	1	0	0	0	0	1	4	1	1	1	0.0577563
ko00785	Lipoic acid metabolism	1	0	0	0	0	0	0	2	2	0	0.289672
