# Supplementary material for: Genome-Wide Analysis of 24-nt siRNAs Dynamic Variations during Rice Superior and Inferior Grain Filling
Source: PLoS One. 2013 Apr 12;8(4):e61029. doi: 10.1371/journal.pone.0061029 (PMC3625182; doi:10.1371/journal.pone.0061029)
Supplement: Table S6 — Frequency of 24 nt-siRNAs that matched perfectly on the antisense strand of coding exons and the expression level of their corresponding target genes. The correlation between 24 nt-siRNA and targets was evaluated by Pearson correlation index, index greater 0.878 was significant at the 0.05 level. (XLS) [file pone.0061029.s010.xls]

## Sheet: siRNA_DGE_link_match_exon_antis
Table S6, Frequency of 24nt-siRNAs that matched perfectly on the antisense strand of coding exons and the expression level of their corresponding target genes. The correlation between 24nt-siRNA and targets was evaluated by Pearson correlation index, index greater 0.878 was significant at the 0.05 level.
siRNA	sequence	S10DAF_siRNA_TPM	S15DAF_siRNA_TPM	S21DAF_siRNA_TPM	S27DAF_siRNA_TPM	S35DAF_siRNA_TPM	I10DAF_siRNA_TPM	I15DAF_siRNA_TPM	I21DAF_siRNA_TPM	I27DAF_siRNA_TPM	I35DAF_siRNA_TPM	target_gene	putative_function	S10DAF_gene_TPM	S15DAF_gene_TPM	S21DAF_gene_TPM	S27DAF_gene_TPM	S35DAF_gene_TPM	I10DAF_gene_TPM	I15DAF_gene_TPM	I21DAF_gene_TPM	I27DAF_gene_TPM	I35DAF_gene_TPM	Pearson correlation index between superior siRNA and targets	Pearson correlation index between inferior siRNA and targets
siR384875	GCCGGTAGGATGAAAGTTGATGGA	7.22863	6.99387	4.56995	3.09076	2.72086	0	2.3032	3.86701	11.0718	11.6435	LOC_Os01g08570.1	2-oxoglutarate and iron-dependent oxygenase domain-containing protein2, putative, expressed	52.07	26.11	24.57	9.29	2.8	0	1.42	24.92	35.43	32.55	0.882746	0.906896
siR265468	CCGGTAGGATGAAAGTTGATGGAT	10.6675	4.36177	2.63651	3.34833	0	0	0	0	5.42292	7.15964	LOC_Os01g08570.1	2-oxoglutarate and iron-dependent oxygenase domain-containing protein2, putative, expressed	52.07	26.11	24.57	9.29	2.8	0	1.42	24.92	35.43	32.55	0.936399	0.788265
siR421907	GTAGGATGAAAGTTGATGGATCAT	0	0	0	0	0	0	0	8.55815	10.3939	0	LOC_Os01g08570.1	2-oxoglutarate and iron-dependent oxygenase domain-containing protein2, putative, expressed	52.07	26.11	24.57	9.29	2.8	0	1.42	24.92	35.43	32.55	#DIV/0!	0.629114
siR17894	AACATCTGGCAGAATGAGGGCTTC	0	0	0	0	0	0	10.2364	25.611	0	9.61851	LOC_Os01g08570.1	2-oxoglutarate and iron-dependent oxygenase domain-containing protein2, putative, expressed	52.07	26.11	24.57	9.29	2.8	0	1.42	24.92	35.43	32.55	#DIV/0!	0.151546
siR545166	TGGATTGAATACGGTTGATGTCAG	0	13.5365	0	0	9.10081	0.859839	15.184	0	24.5726	12.8006	LOC_Os01g12890.1	expressed protein	2.29	3.05	5.33	0	1.87	2.56	5.49	2.74	8.01	5.01	0.0308956	0.993691
siR443300	GTTGTCTTGGATTGAATACGGTTG	0	0	0	0	0	0	0	5.76882	14.2917	0	LOC_Os01g12890.1	expressed protein	2.29	3.05	5.33	0	1.87	2.56	5.49	2.74	8.01	5.01	#DIV/0!	0.618924
siR515886	TCTTGGATTGAATACGGTTGATGT	8.4217	6.01624	4.39418	3.7776	3.56527	0	11.4307	12.0448	10.4504	4.12222	LOC_Os01g12890.1	expressed protein	2.29	3.05	5.33	0	1.87	2.56	5.49	2.74	8.01	5.01	0.13244	0.398507
siR558094	TGTCTTGGATTGAATACGGTTGAT	0	0	0	0	0	0	10.1511	0	0	0	LOC_Os01g12890.1	expressed protein	2.29	3.05	5.33	0	1.87	2.56	5.49	2.74	8.01	5.01	#DIV/0!	0.181645
siR234426	CATAAGGTCGGTAAGCATATCCAT	0	0	0	0	0	0	10.3217	0	0	0	LOC_Os01g16060.1	expressed protein	1.04	0	0.59	0	1.56	2.77	2.48	2.13	0.62	0	#DIV/0!	0.40353
siR530536	TGCAACGGAGCGGAGCACAGATGG	0	0	0	0	0	0	13.5633	0	0	0	LOC_Os01g16060.1	expressed protein	1.04	0	0.59	0	1.56	2.77	2.48	2.13	0.62	0	#DIV/0!	0.40353
siR138950	AGGTGGATGCTGCGAACATATCGG	0	0	0	0	0	0	38.8984	0	0	0	LOC_Os01g19310.1	retrotransposon protein, putative, unclassified	0	0	0	0	0	1.28	0	0	0.62	0	#DIV/0!	-0.372506
siR101864	AGAACTTGTATGGACAGAGGGAGT	0	0	0	0	0.562937	0	4.26518	14.2636	0	3.76062	LOC_Os01g66070.1	PHD-finger domain containing protein, putative	0	0	0	0	0	0	0.53	0.91	0	0	#DIV/0!	0.906387
siR531800	TGCAGAACTTCTGGATGGTAGAGA	17.1943	10.9044	9.31566	9.44399	7.88112	0	17.6578	40.5086	17.1726	27.8431	LOC_Os02g12840.1	DEAD-box ATP-dependent RNA helicase, putative, expressed	4.37	0.68	0.59	2.65	1.25	0	1.24	1.82	2.16	6.26	0.78895	0.496132
siR376553	GCAGAACTTCTGGATGGTAGAGAA	33.1955	13.6869	9.6672	7.46934	6.75524	0	8.95687	33.2183	19.7146	17.0674	LOC_Os02g12840.1	DEAD-box ATP-dependent RNA helicase, putative, expressed	4.37	0.68	0.59	2.65	1.25	0	1.24	1.82	2.16	6.26	0.7562	0.338197
siR101845	AGAACTTCTGGATGGTAGAGAACA	46.6703	0	16.6979	0	14.4487	0	54.5943	150.18	63.6628	38.5464	LOC_Os02g12840.1	DEAD-box ATP-dependent RNA helicase, putative, expressed	4.37	0.68	0.59	2.65	1.25	0	1.24	1.82	2.16	6.26	0.68158	0.0287039
siR181335	ATGACGGAGGTAGCAGACTGGTTG	0	0	0	0	0	0	0	38.7335	0	0	LOC_Os02g12840.1	DEAD-box ATP-dependent RNA helicase, putative, expressed	4.37	0.68	0.59	2.65	1.25	0	1.24	1.82	2.16	6.26	#DIV/0!	-0.112582
siR539964	TGCTGCCCACTTTGAACATGACGG	0	0	0	0	0	0	0	19.0815	0	0	LOC_Os02g12840.1	DEAD-box ATP-dependent RNA helicase, putative, expressed	4.37	0.68	0.59	2.65	1.25	0	1.24	1.82	2.16	6.26	#DIV/0!	-0.112582
siR500846	TCGGCAGATCGTAGAAGATGGCAG	13.966	0	0	6.52494	0	0	17.9137	35.754	0	0	LOC_Os02g12840.1	DEAD-box ATP-dependent RNA helicase, putative, expressed	4.37	0.68	0.59	2.65	1.25	0	1.24	1.82	2.16	6.26	0.986503	-0.237659
siR127978	AGGAAAACATAATTGGAACGGTAG	0	0	0	0	0	0	0	18.3208	0	0	LOC_Os03g63940.1	CBS domain containing membrane protein, putative, expressed	17.29	11.02	18.35	5.64	19.93	61.77	31.36	24.32	27.11	15.34	#DIV/0!	-0.242511
siR194754	ATTCAGGGCAGCGCTAAGAGATGT	0	6.39225	0	0	0	0	8.53035	17.2431	0	0	LOC_Os03g63940.1	CBS domain containing membrane protein, putative, expressed	17.29	11.02	18.35	5.64	19.93	61.77	31.36	24.32	27.11	15.34	-0.320664	-0.252552
siR111995	AGATAACATACCTTGAACCAGCAA	0	0	0	0	0	0	4.69169	15.2779	0	0	LOC_Os03g63940.1	CBS domain containing membrane protein, putative, expressed	17.29	11.02	18.35	5.64	19.93	61.77	31.36	24.32	27.11	15.34	#DIV/0!	-0.256245
siR59785	ACAGACAGATAACATACCTTGAAC	15.4398	9.02435	2.72439	2.57563	0	0	4.52109	15.9118	11.9191	4.7731	LOC_Os03g63940.1	CBS domain containing membrane protein, putative, expressed	17.29	11.02	18.35	5.64	19.93	61.77	31.36	24.32	27.11	15.34	0.00634188	-0.581779
siR61154	ACAGGTAGAAGTCGAACTCACTAG	9.26387	0	0	0	0	0	0	20.4762	0	0	LOC_Os07g09020.1	argonaute, putative, expressed	11.46	11.19	2.07	2.65	0.93	129.94	86.63	52.28	19.72	5.95	0.622421	-0.0733353
siR131041	AGGATATGTCTGAAAGCACGAGGA	0	0	0	0	0	0	0	0	75.243	0	LOC_Os07g09020.1	argonaute, putative, expressed	11.46	11.19	2.07	2.65	0.93	129.94	86.63	52.28	19.72	5.95	#DIV/0!	-0.433812
siR562301	TGTTCCCTGGACAGACAAGAGCAA	0	0	0	0	0	0	0	0	18.9237	0	LOC_Os07g09020.1	argonaute, putative, expressed	11.46	11.19	2.07	2.65	0.93	129.94	86.63	52.28	19.72	5.95	#DIV/0!	-0.433812
siR342595	GAAGAATGGGGTAGAGGATATGTC	0	0	7.64587	7.64105	0	0	0	4.50095	17.1726	0	LOC_Os07g09020.1	argonaute, putative, expressed	11.46	11.19	2.07	2.65	0.93	129.94	86.63	52.28	19.72	5.95	-0.578318	-0.467854
siR368195	GATGAACTCGTGCAGGTGGTGCAG	0	0	0	0	0	0	0	0	0	10.8479	LOC_Os07g09020.1	argonaute, putative, expressed	11.46	11.19	2.07	2.65	0.93	129.94	86.63	52.28	19.72	5.95	#DIV/0!	-0.586261
siR420855	GTAGAACGACCGAGAAACGATGAC	7.93044	5.94103	0	2.40393	1.59499	0	0	0	0	17.3567	LOC_Os07g09020.1	argonaute, putative, expressed	11.46	11.19	2.07	2.65	0.93	129.94	86.63	52.28	19.72	5.95	0.941775	-0.586261
siR296280	CGGCGATGAACTCGTGCAGGTGGT	10.106	1.27845	0	3.7776	0	0	0	0	0	8.60604	LOC_Os07g09020.1	argonaute, putative, expressed	11.46	11.19	2.07	2.65	0.93	129.94	86.63	52.28	19.72	5.95	0.614146	-0.586261
siR162430	ATATTGGCGTAGAGGCAAGAAATT	0	0	4.3063	0	0	0	0	15.4681	0	5.13469	LOC_Os08g28940.1	OsFBX289 - F-box domain containing protein, expressed	2.5	0.51	6.81	1.66	2.8	0	1.42	2.13	0.62	3.44	0.92789	0.534133
siR94128	ACTGACCAGACTGAGCTTCAGAAA	0	0	0	0	1.40734	0	1.96198	16.2288	0	0	LOC_Os08g28940.1	OsFBX289 - F-box domain containing protein, expressed	2.5	0.51	6.81	1.66	2.8	0	1.42	2.13	0.62	3.44	-0.0131416	0.254283
siR128446	AGGAAGAGTGACGATGCCAATTTG	15.0889	8.64834	0	0	0	0	0	0	0	0	LOC_Os09g32750.1	FHA domain containing protein, putative, expressed	0.62	0	0	0	0	0	0.35	0	0	0	0.839294	#DIV/0!
siR173108	ATCGAGTTGGCAGGAGAAAGTAGA	0	0	0	0	0	0	0	40.0014	0	0	LOC_Os09g32750.1	FHA domain containing protein, putative, expressed	0.62	0	0	0	0	0	0.35	0	0	0	#DIV/0!	-0.25
siR518805	TGAACTTGGCGCGGAAGATCTCAC	7.29881	0	0	0	0	0	0	0	0	11.3542	LOC_Os10g05520.1	OsFBX371 - F-box domain containing protein, expressed	1.04	1.36	0.89	0	0.62	0	1.95	2.43	1.85	0.94	0.28149	-0.285909
siR59082	ACACTCTAGTAGTTCTTTCGTCTT	0	0	0	0	0	0	22.4348	0	0	0	LOC_Os10g30690.1	MYB family transcription factor, putative, expressed	0.42	0	0.89	0.99	0	8.31	6.73	3.65	1.23	0	#DIV/0!	0.434951
siR484967	TCATCTTTTAGCTTCGGACGGTCA	0	2.03048	0	0	0	21.0661	15.0987	8.74833	2.82444	0	LOC_Os11g44680.1	calmodulin binding protein, putative, expressed	0	0	0	0	0	1.28	1.06	0	0	0.94	#DIV/0!	0.550016
siR537548	TGCGGTGATCAAACTCAGATTCGG	7.86025	3.91055	0	0	0	21.8399	23.6291	11.918	8.19087	2.9651	LOC_Os11g44680.1	calmodulin binding protein, putative, expressed	0	0	0	0	0	1.28	1.06	0	0	0.94	#DIV/0!	0.500112
siR241095	CATCTTTTAGCTTCGGACGGTCAC	4.49157	2.70731	0	0	0	10.662	11.8572	8.62154	6.77865	1.88031	LOC_Os11g44680.1	calmodulin binding protein, putative, expressed	0	0	0	0	0	1.28	1.06	0	0	0.94	#DIV/0!	0.195944
